# Supplementary material for: Genome-wide screen reveals Rab12 GTPase as a critical activator of Parkinson’s disease-linked LRRK2 kinase
Source: eLife journal article supplement (doi:10.7554/elife.87098), 2023-06-23

WT GFP + ML2

WT GFP

WT  
GFP-Rab12

RC GFP

RC  
GFP-Rab12

GS GFP

GS  
GFP-Rab12

WT GFP + ML2

WT GFP

WT  
GFP-Rab12

RC GFP

RC  
GFP-Rab12

GS GFP

GS  
GFP-Rab12

250 -

50 -

250 -

25 -

25 -

- LRRK2 -

- GFP-Rab12 -

- LRRK2 pS935 -

- pRab10 -

- total Rab10 -

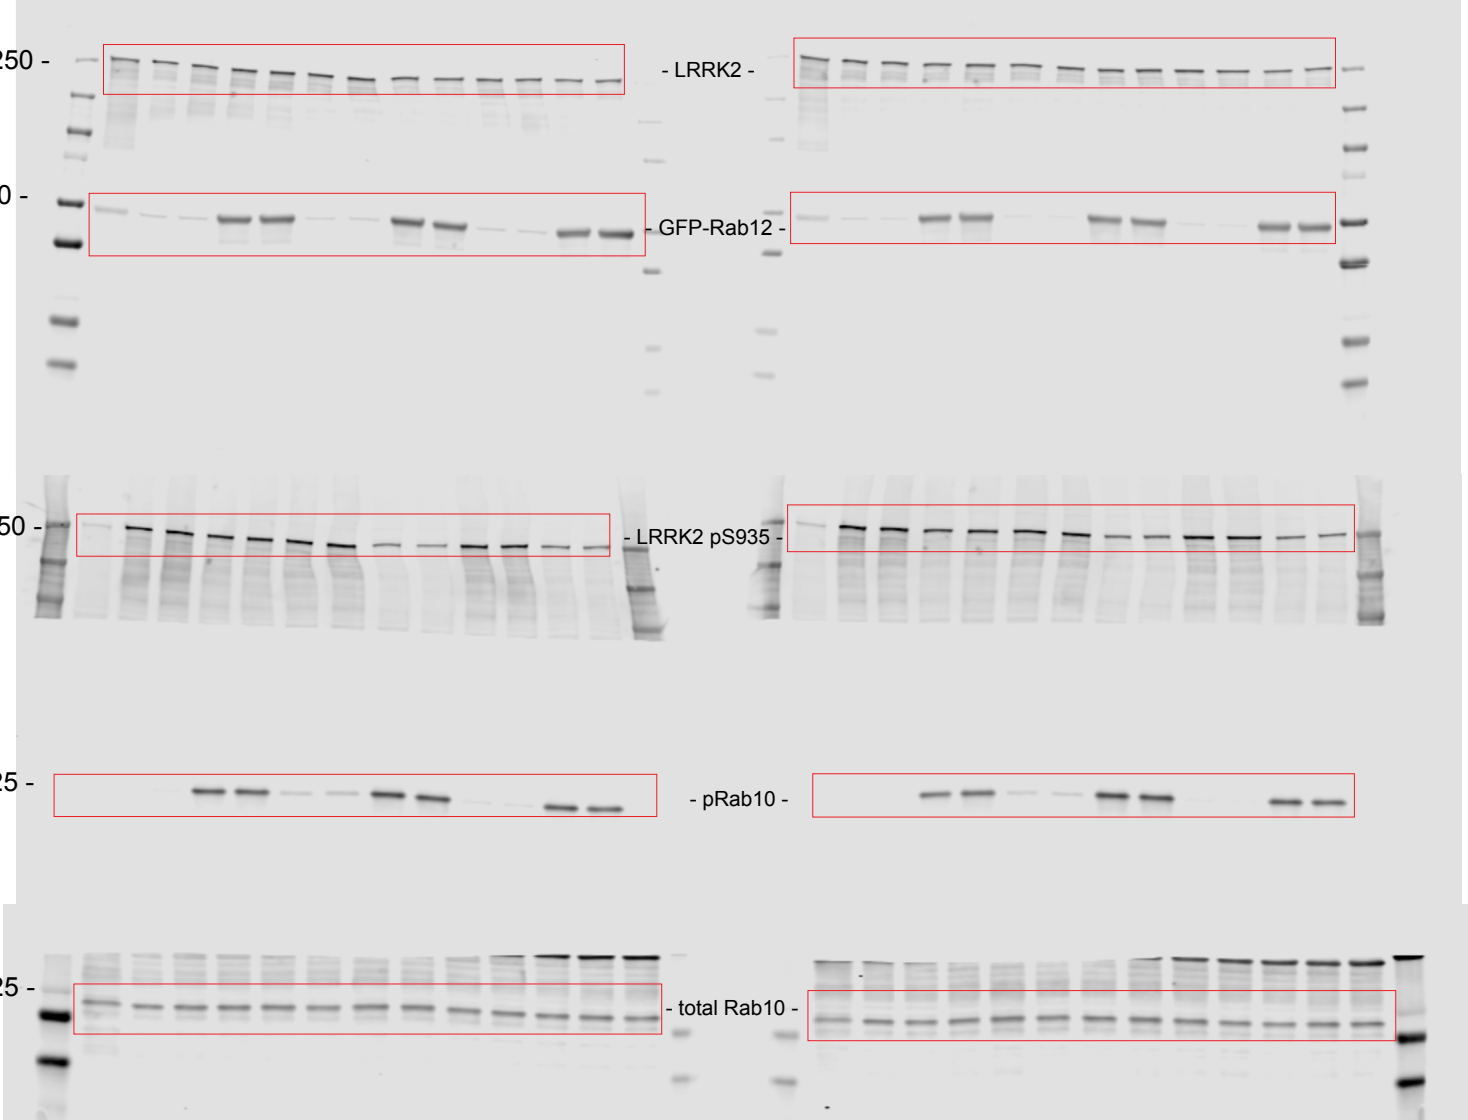

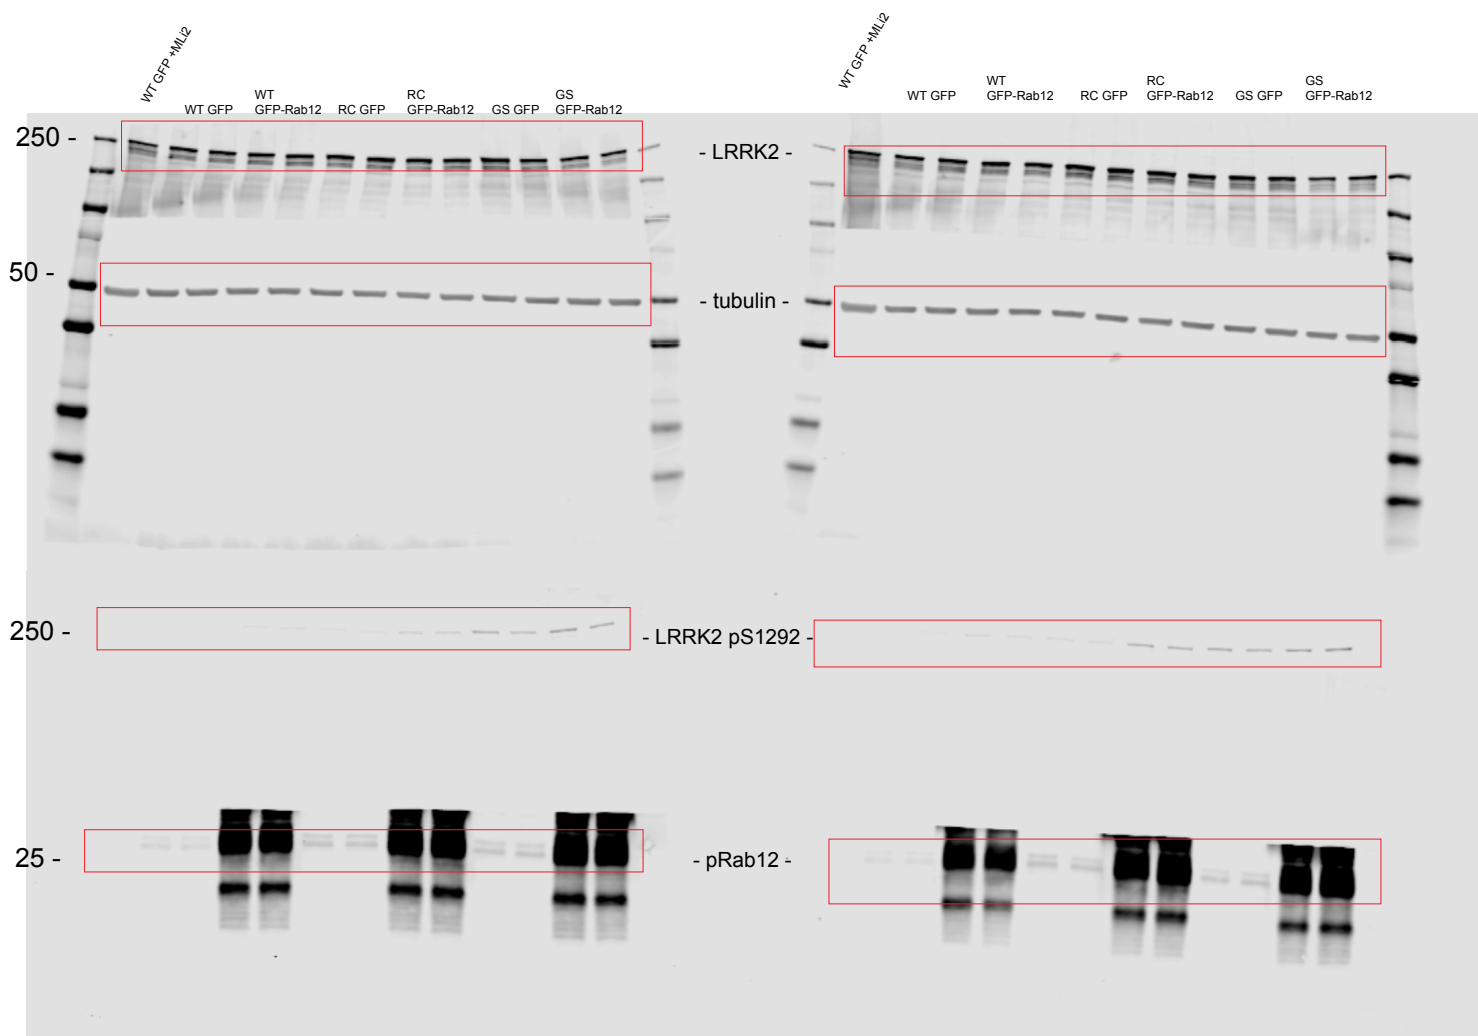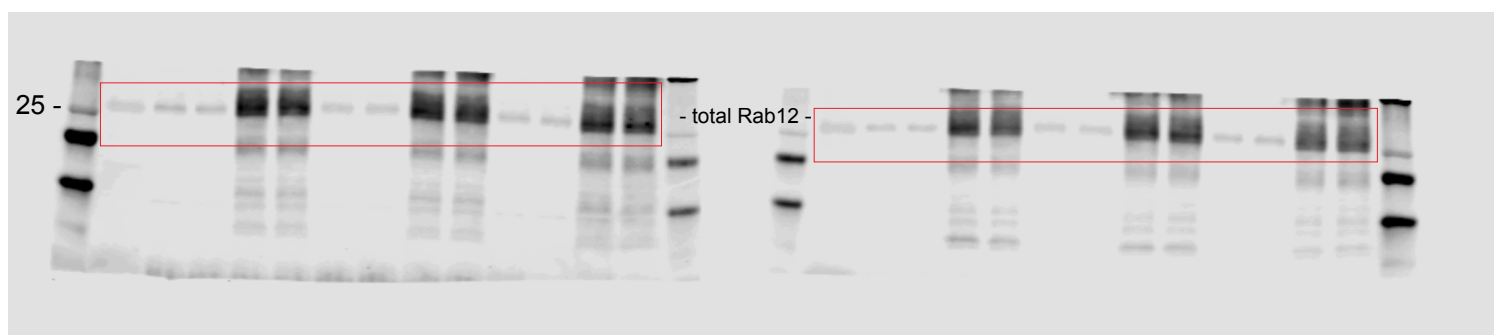

Supplement: fig3-data1 [file elife-87098-fig3-data1-v2.zip]
