# Supplementary material for: Genome-wide screen reveals Rab12 GTPase as a critical activator of Parkinson’s disease-linked LRRK2 kinase
Source: eLife journal article supplement (doi:10.7554/elife.87098), 2023-06-23

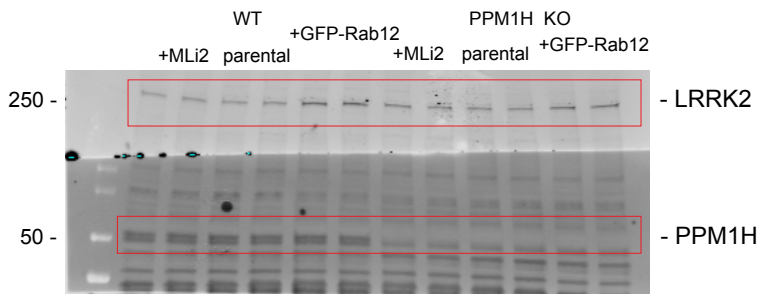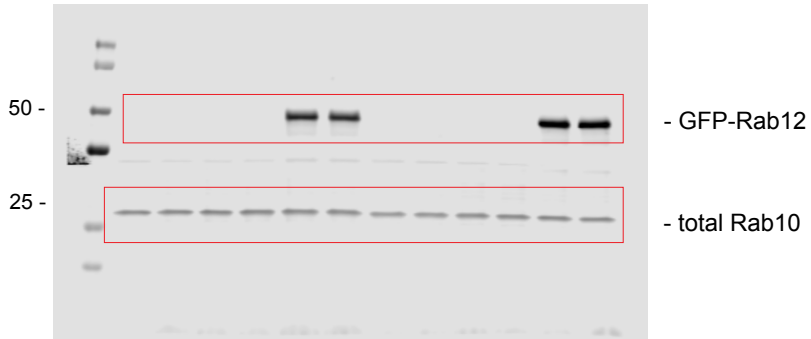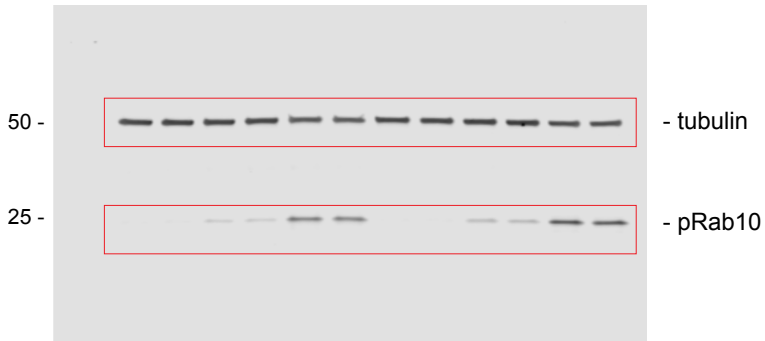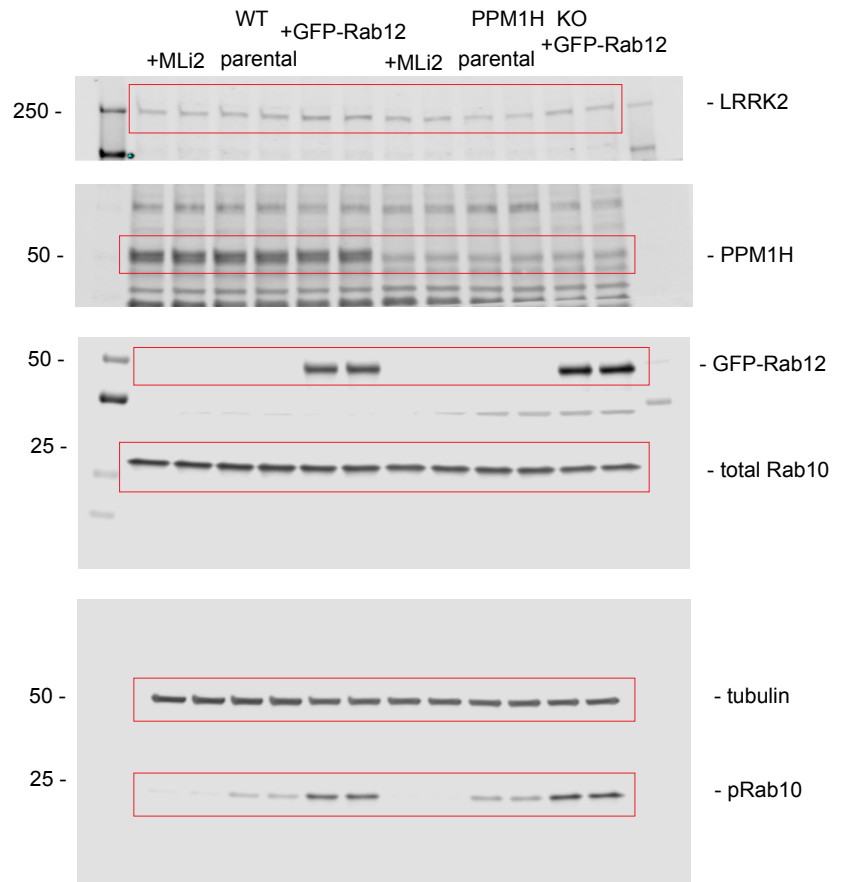

WT +GFP-Rab12 PPM1H KO +GFP-Rab12  
 +MLi2 parental +MLi2 parental

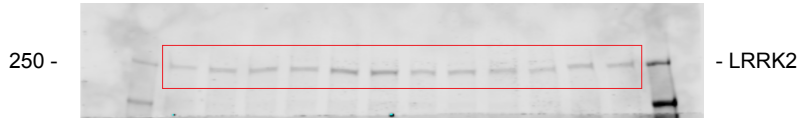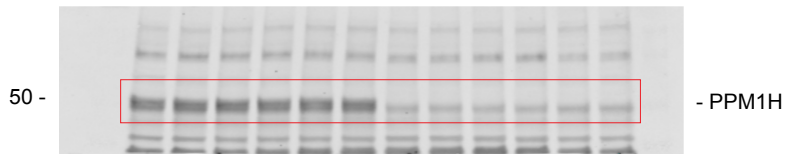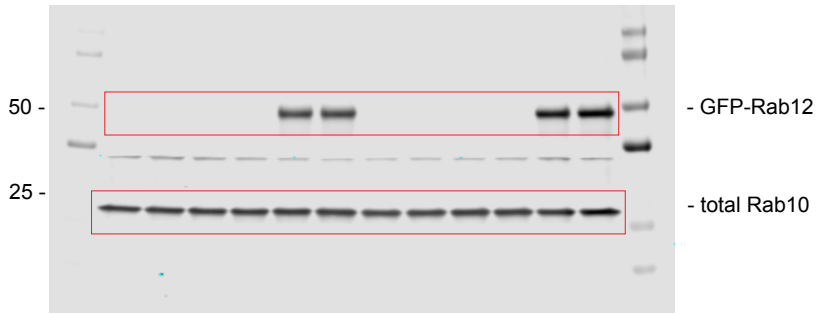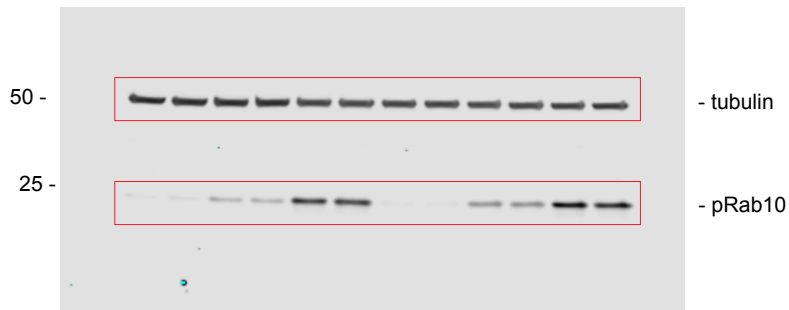

WT +GFP-Rab12 PPM1H KO +GFP-Rab12  
 +MLi2 parental +MLi2 parental

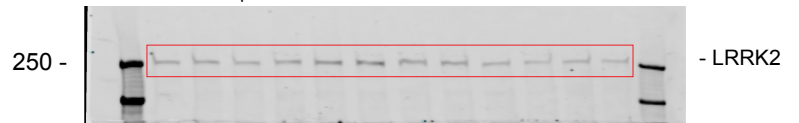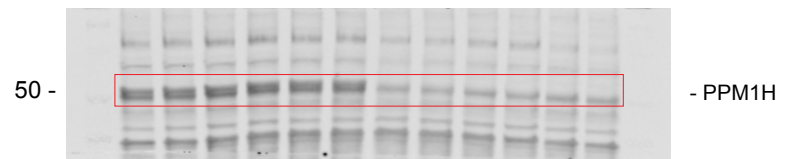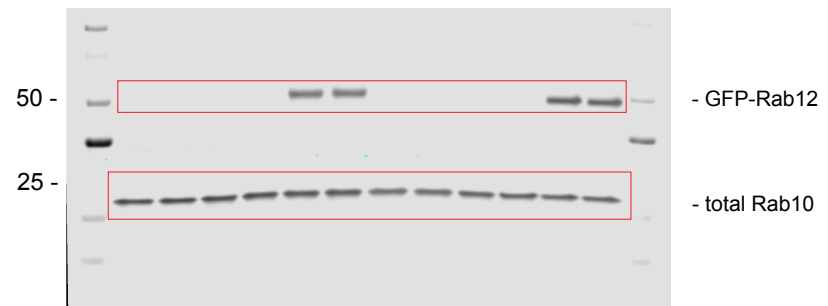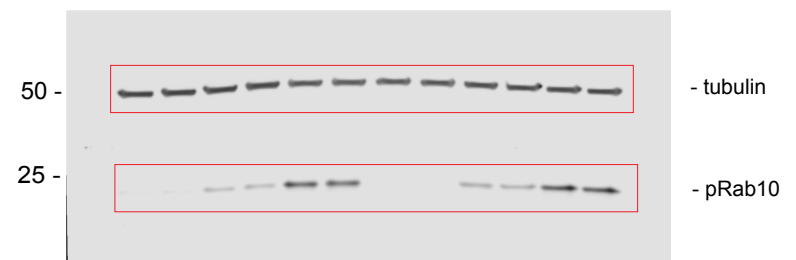

Supplement: fig5-data1 [file elife-87098-fig5-data1-v2.zip]
