# Supplementary material for: Genome-wide screen reveals Rab12 GTPase as a critical activator of Parkinson’s disease-linked LRRK2 kinase
Source: eLife. 2023 Oct 24;12:e87098. doi: 10.7554/eLife.87098 (PMC10708890; doi:10.7554/eLife.87098)
Supplement: Supplementary file 1. [file elife-87098-supp1.xlsx]

## Sheet: Primer
	Primer	Category	Sequence	Description
	seq-lenti-WPRE	Sequencing	aagcagcgtatccacatagcg	Reverse downstrm of gene in pMCB306 in wpre
	CMV_seqFor	Sequencing	cggtaggcgtgtacggtg	CMV forward primer upstream from sequetech cmv primer
	Puro T2A Fw	Sequencing	CGTCGAGGTGCCCGAAGGAC	To sequence any thing in lentiviral vector pMCB306 forward
	seq-U6	Sequencing	gcctatttcccatgattccttc	Sequencing gRNA sequence plasmids
	CMV promoter-Fw	PCR	cgcaaatgggcggtaggc	colony reactions plus sequencing
	Seq-ef1a-fw	Sequencing	TCAAGCCTCAGACAGTGG	3' of ef1a promoter
	pmcb306 mU6-fw	Sequencing	cattttacatgataggcttgg
	P5-illumina-Fw	Sequencing	AATGATACGGCGACCACCG
	P7-illumina-Rv	Sequencing	CAAGCAGAAGACGGCATACG
	TRE3G-Fw	sequencing	atcgcctggagcaattcc	lenti TO
	Seq_bgh_rv		ggaggggcaaacaacagatgg	pCMV reverse
	Addgene-P5-F-0	Sequencing	AATGATACGGCGACCACCGAGATCTACACTCTTTCCCTACACGACGCTCTTCCGATCTTTGTGGAAAGGACGAAACACCG	P5-pool-Forward NGS illumina library prep
	Addgene-P5-F-1	Sequencing	AATGATACGGCGACCACCGAGATCTACACTCTTTCCCTACACGACGCTCTTCCGATCTCTTGTGGAAAGGACGAAACACCG	P5-pool-Forward NGS illumina library prep
	Addgene-P5-F-2	Sequencing	AATGATACGGCGACCACCGAGATCTACACTCTTTCCCTACACGACGCTCTTCCGATCTGCTTGTGGAAAGGACGAAACACCG	P5-pool-Forward NGS illumina library prep
	Addgene-P5-F-3	Sequencing	AATGATACGGCGACCACCGAGATCTACACTCTTTCCCTACACGACGCTCTTCCGATCTAGCTTGTGGAAAGGACGAAACACCG	P5-pool-Forward NGS illumina library prep
	Addgene-P5-F-4	Sequencing	AATGATACGGCGACCACCGAGATCTACACTCTTTCCCTACACGACGCTCTTCCGATCTCAACTTGTGGAAAGGACGAAACACCG	P5-pool-Forward NGS illumina library prep
	Addgene-P5-F-6	Sequencing	AATGATACGGCGACCACCGAGATCTACACTCTTTCCCTACACGACGCTCTTCCGATCTTGCACCTTGTGGAAAGGACGAAACACCG	P5-pool-Forward NGS illumina library prep
	Addgene-P5-F-7	Sequencing	AATGATACGGCGACCACCGAGATCTACACTCTTTCCCTACACGACGCTCTTCCGATCTACGCAACTTGTGGAAAGGACGAAACACCG	P5-pool-Forward NGS illumina library prep
	Addgene-P5-F-8	Sequencing	AATGATACGGCGACCACCGAGATCTACACTCTTTCCCTACACGACGCTCTTCCGATCTGAAGACCCTTGTGGAAAGGACGAAACACCG	P5-pool-Forward NGS illumina library prep
	Addgene-P7-R-H01	Sequencing	CAAGCAGAAGACGGCATACGAGATGCGTTCGGGTGACTGGAGTTCAGACGTGTGCTCTTCCGATCTTCTACTATTCTTTCCCCTGCACTGTAC	P7-index-Reverse NGS illumina library prep
	Addgene-P7-R-H02	Sequencing	CAAGCAGAAGACGGCATACGAGATCGACTCTTGTGACTGGAGTTCAGACGTGTGCTCTTCCGATCTTCTACTATTCTTTCCCCTGCACTGTAC	P7-index-Reverse NGS illumina library prep
	Addgene-P7-R-H03	Sequencing	CAAGCAGAAGACGGCATACGAGATATACCTAAGTGACTGGAGTTCAGACGTGTGCTCTTCCGATCTTCTACTATTCTTTCCCCTGCACTGTAC	P7-index-Reverse NGS illumina library prep
	Addgene-P7-R-H04	Sequencing	CAAGCAGAAGACGGCATACGAGATCGGTGATTGTGACTGGAGTTCAGACGTGTGCTCTTCCGATCTTCTACTATTCTTTCCCCTGCACTGTAC	P7-index-Reverse NGS illumina library prep
	Addgene-P7-R-H05	Sequencing	CAAGCAGAAGACGGCATACGAGATTAACGACCGTGACTGGAGTTCAGACGTGTGCTCTTCCGATCTTCTACTATTCTTTCCCCTGCACTGTAC	P7-index-Reverse NGS illumina library prep
	Addgene-P7-R-H06	Sequencing	CAAGCAGAAGACGGCATACGAGATATACAGCCGTGACTGGAGTTCAGACGTGTGCTCTTCCGATCTTCTACTATTCTTTCCCCTGCACTGTAC	P7-index-Reverse NGS illumina library prep
	Addgene-P7-R-D01	Sequencing	CAAGCAGAAGACGGCATACGAGATTATGGACCGTGACTGGAGTTCAGACGTGTGCTCTTCCGATCTTCTACTATTCTTTCCCCTGCACTGTAC	P7-index-Reverse NGS illumina library prep
	Addgene-P7-R-D02	Sequencing	CAAGCAGAAGACGGCATACGAGATGCCAAGTTGTGACTGGAGTTCAGACGTGTGCTCTTCCGATCTTCTACTATTCTTTCCCCTGCACTGTAC	P7-index-Reverse NGS illumina library prep
	Addgene-P7-R-D03	Sequencing	CAAGCAGAAGACGGCATACGAGATCGCAGACCGTGACTGGAGTTCAGACGTGTGCTCTTCCGATCTTCTACTATTCTTTCCCCTGCACTGTAC	P7-index-Reverse NGS illumina library prep
	Addgene-P7-R-D04	Sequencing	CAAGCAGAAGACGGCATACGAGATCGACCTCCGTGACTGGAGTTCAGACGTGTGCTCTTCCGATCTTCTACTATTCTTTCCCCTGCACTGTAC	P7-index-Reverse NGS illumina library prep
	Addgene-P7-R-D05	Sequencing	CAAGCAGAAGACGGCATACGAGATGCCACTGGGTGACTGGAGTTCAGACGTGTGCTCTTCCGATCTTCTACTATTCTTTCCCCTGCACTGTAC	P7-index-Reverse NGS illumina library prep
	Addgene-P7-R-D06	Sequencing	CAAGCAGAAGACGGCATACGAGATGCGTAGTTGTGACTGGAGTTCAGACGTGTGCTCTTCCGATCTTCTACTATTCTTTCCCCTGCACTGTAC	P7-index-Reverse NGS illumina library prep
	1stPCR-HD-BRIE-fw	PCR	ATCATATGCTTACCGTAACTTGAAAGTATTTCG	PLentiGuide for library vector
	1stPCR-HD-BRIE-Rv	PCR	GACTCGGTGCCACTTTTTCAAG	PLentiGuide for library vector

## Sheet: Mageck-MLE results
Gene	sgRNA	pRab.beta	pRab.z	pRab.p.value	pRab.fdr	pRab.wald.p.value	pRab.wald.fdr
Hist1h2bk	4	1.2729	0.7695	0	0	0.4416	0.85019
Rab10	4	-1.134	-4.044	0	0	5.2551e-05	0.086161
Rpl17	4	0.93989	0.83591	0	0	0.4032	0.83428
Rps4x	4	0.93277	1.1371	0	0	0.25549	0.76243
Rps14	4	0.93032	1.0137	0	0	0.31071	0.79204
Lrrk2	4	-0.90644	-6.7115	0	0	1.9261e-11	3.7896e-07
Gins2	4	0.906	1.2802	0	0	0.20047	0.7349
Uba3	4	0.83087	1.6363	0	0	0.10177	0.68249
Capzb	4	0.81801	1.6382	0	0	0.10139	0.682
Tubb5	4	0.81362	1.4306	0	0	0.15253	0.7052
Tuba1c	4	0.81004	1.255	0	0	0.20947	0.73982
Med12	4	0.80183	1.7435	0	0	0.081248	0.67147
Eif2s1	4	0.79017	1.4516	0	0	0.14663	0.7052
Phb2	4	0.78926	1.6575	0	0	0.097417	0.67975
Metap1	4	0.7783	1.4977	0	0	0.1342	0.70189
Srsf1	4	0.77048	1.7249	0	0	0.08454	0.67147
Smc3	4	0.76172	1.8503	0	0	0.064273	0.67147
Hgs	4	0.75907	1.3149	0	0	0.18856	0.72614
Psmb7	4	0.75781	1.559	0	0	0.119	0.68961
Eif4a3	4	0.75077	1.1403	0	0	0.25415	0.76139
Nipbl	4	0.74136	1.8244	0	0	0.068095	0.67147
Tsc2	4	0.73671	1.8503	0	0	0.064266	0.67147
Slmo2	4	0.73149	1.6234	0	0	0.1045	0.68346
Actb	4	0.72613	1.8224	0	0	0.068401	0.67147
Tbca	4	0.72315	1.8259	0	0	0.067864	0.67147
C130026I21Rik	4	0.71793	1.6706	0	0	0.094801	0.67907
Gm15319	4	0.71112	1.5779	0	0	0.11458	0.68874
Eif2b2	4	0.70535	1.8158	0	0	0.069409	0.67147
Eif5	4	0.70368	1.7771	0	0	0.07555	0.67147
Actl6a	4	0.68121	1.6663	0	0	0.095645	0.67975
Gm14632	4	0.67522	1.4474	0	0	0.14779	0.7052
Nedd8	4	0.67419	1.8604	0	0	0.062823	0.67147
Nfib	4	0.67361	2.1643	0	0	0.030438	0.67147
Pcna	4	0.67315	1.6823	0	0	0.092503	0.6783
Uba1	4	0.6681	1.74	0	0	0.081867	0.67147
Atp6v0c	4	0.65976	1.8627	0	0	0.06251	0.67147
Mau2	4	0.65925	2.0451	0	0	0.040841	0.67147
Ttk	4	0.65754	1.825	0	0	0.068008	0.67147
Atp6v1b2	4	0.65506	1.7235	0	0	0.0848	0.67147
Xpo1	4	0.65202	1.5143	0	0	0.12994	0.69689
Med7	4	0.64722	2.1042	0	0	0.035362	0.67147
Chaf1b	4	0.64699	2.0099	0	0	0.044444	0.67147
Eif3d	4	0.64558	1.8752	0	0	0.060766	0.67147
Wdr70	4	0.64167	1.7382	0	0	0.082182	0.67147
Ube2m	4	0.63846	2.0077	0	0	0.044675	0.67147
Psma6	4	0.636	1.6153	0	0	0.10626	0.68346
Hist1h3g	4	0.63542	1.6158	0	0	0.10615	0.68346
Nf2	4	0.63373	1.81	0	0	0.0703	0.67147
Med22	4	0.63209	1.9534	0	0	0.050771	0.67147
Rpl11	4	0.63039	1.3246	0	0	0.18529	0.72547
Rnf40	4	0.62688	1.8579	0	0	0.06318	0.67147
Med20	4	0.62016	1.679	0	0	0.093158	0.6783
Med10	4	0.61975	2.0051	0	0	0.04495	0.67147
Mcm4	4	0.61813	1.9301	0	0	0.053592	0.67147
Rpl5	4	0.61469	1.5742	0	0	0.11545	0.68874
Phb	4	0.61009	1.8023	0	0	0.071499	0.67147
Polr2g	4	0.60936	1.5168	0	0	0.12931	0.69609
Pmpcb	4	0.60732	1.9792	0	0	0.047797	0.67147
Cops6	4	0.607	1.9763	0	0	0.048116	0.67147
Grwd1	4	0.6042	1.9056	0	0	0.056707	0.67147
Kat5	4	0.60256	1.7227	0	0	0.084945	0.67147
Wdr1	4	0.60166	2.1656	0	0	0.030344	0.67147
Polr2c	4	0.60045	1.6738	0	0	0.094168	0.6783
Psmb6	4	0.60021	1.9178	0	0	0.05514	0.67147
Snrpa1	4	0.5997	1.4611	0	0	0.14398	0.7046
Naa15	4	0.59964	2.2302	0	0	0.025733	0.67147
Med4	4	0.59821	1.808	0	0	0.070614	0.67147
Myh9	4	-0.59451	-5.8068	0	0	6.3695e-09	6.266e-05
Qars	4	0.59203	1.7815	0	0	0.074838	0.67147
Cct4	4	0.59193	2.0012	0	0	0.045373	0.67147
Srbd1	4	0.59153	1.5512	0	0	0.12085	0.68961
Psmc1	4	0.5908	2.1377	0	0	0.032537	0.67147
U2af1	4	0.58783	1.7922	0	0	0.073094	0.67147
Hspe1	4	0.58618	1.762	0	0	0.078064	0.67147
Urod	4	0.58607	2.1369	0	0	0.032603	0.67147
Polr2b	4	0.58541	1.4603	0	0	0.1442	0.7046
Cct5	4	0.58439	1.5721	0	0	0.11592	0.68874
Psma5	4	0.5839	1.6721	0	0	0.094497	0.6783
Ifnz	4	0.58147	1.8499	0	0	0.06433	0.67147
Psmg3	4	0.5812	2.1112	0	0	0.034753	0.67147
Tubg1	4	0.57596	1.9138	0	0	0.055647	0.67147
Hist1h3h	4	0.57399	1.5002	0	0	0.13356	0.70094
Psma7	4	0.56834	1.91	0	0	0.05613	0.67147
Plk1	4	0.56775	1.796	0	0	0.072492	0.67147
Orc1	4	0.56638	2.2491	0	0	0.024507	0.67147
Gnl3	4	0.56255	1.9848	0	0	0.047162	0.67147
Cnot8	4	0.56186	2.0691	0	0	0.03854	0.67147
Cdk1	4	0.56051	1.1274	0	0	0.25958	0.76525
Mylip	4	0.55945	2.2861	0	0	0.022246	0.67147
Polr2l	4	0.55909	1.7632	0	0	0.077872	0.67147
Ncapg2	4	0.5586	1.8834	0	0	0.059642	0.67147
Mcm5	4	0.55777	1.8328	0	0	0.066828	0.67147
Cct8	4	0.55763	1.8922	0	0	0.058469	0.67147
Usp5	4	0.55733	1.769	0	0	0.076898	0.67147
LOC100861615	4	0.55396	1.1706	0	0	0.24178	0.75844
Snrpg	4	0.55095	1.4637	0	0	0.14327	0.7046
Srsf2	4	0.55071	1.8418	0	0	0.065511	0.67147
Psma1	4	0.54964	1.871	0	0	0.061344	0.67147
Rpl10a	4	0.54853	1.3718	0	0	0.17012	0.71564
Psmc3	4	0.54699	1.9162	0	0	0.055338	0.67147
Psmb4	4	0.54447	1.7045	0	0	0.088288	0.67496
Dnajc13	4	0.54263	2.1435	0	0	0.032076	0.67147
Tbcc	4	0.54182	2.0449	0	0	0.040861	0.67147
Hist1h2ag	4	0.54106	1.5141	0	0	0.12999	0.69689
Psma3	4	0.54044	1.7826	0	0	0.074652	0.67147
Rplp2	4	0.5392	1.7207	0	0	0.085306	0.6726
Mars	4	0.53765	1.8408	0	0	0.065653	0.67147
Rps13	4	0.53758	1.456	0	0	0.14538	0.7052
Mad2l1	4	0.53699	1.8027	0	0	0.071432	0.67147
Gm10220	4	0.53688	1.8139	0	0	0.0697	0.67147
Timm10	4	0.53531	2.0132	0	0	0.04409	0.67147
Cct7	4	0.53384	1.8629	0	0	0.062471	0.67147
Amotl2	4	0.52741	2.238	0	0	0.025224	0.67147
Rps25	4	0.527	1.3814	0	0	0.16717	0.71533
Ppp1cb	4	0.5245	1.958	0	0	0.050234	0.67147
Tceb2	4	0.52416	2.1471	0	0	0.031783	0.67147
Dbf4	4	0.52276	1.876	0	0	0.060653	0.67147
1600014C10Rik	4	0.52205	1.7326	0	0	0.08316	0.67147
Snrpf	4	0.52201	1.0622	0	0	0.28816	0.78191
Kctd10	4	0.51931	2.3289	0	0	0.019865	0.67147
Hist1h2bj	4	0.51838	1.2956	0	0	0.19511	0.73008
BC061237	4	0.51833	1.8033	0	0	0.071344	0.67147
Atrip	4	0.51775	2.094	0	0	0.036257	0.67147
Sf3a3	4	0.5167	1.6679	0	0	0.095331	0.67975
Tango6	4	0.51633	2.178	0	0	0.029406	0.67147
Rpl4	4	0.51621	1.5146	0	0	0.12989	0.69689
Dtymk	4	0.51539	1.737	0	0	0.082391	0.67147
Nudt21	4	0.51426	2.1312	0	0	0.03307	0.67147
Grpel1	4	0.51384	2.0962	0	0	0.036065	0.67147
Cenpk	4	0.51308	1.755	0	0	0.079253	0.67147
Cdc23	4	0.51274	2.0176	0	0	0.043631	0.67147
Rae1	4	0.51237	1.7875	0	0	0.073865	0.67147
Vps11	4	0.51207	2.425	0	0	0.01531	0.67147
Med26	4	0.51149	2.2055	0	0	0.027416	0.67147
Iars2	4	0.51048	2.0367	0	0	0.041677	0.67147
Med21	4	0.50914	2.1876	0	0	0.028701	0.67147
Gm21119	4	0.5089	1.4042	0	0	0.16025	0.70913
Pole2	4	0.50779	1.5612	0	0	0.11848	0.68961
Gm4305	4	0.50614	1.7846	0	0	0.074323	0.67147
Snrpd3	4	0.50518	1.4908	0	0	0.13601	0.70189
Rpl19	4	0.50501	1.366	0	0	0.17195	0.71894
Tada3	4	0.50497	2.1769	0	0	0.029487	0.67147
Cul3	4	0.50376	2.224	0	0	0.02615	0.67147
Rplp0	4	0.50273	1.5526	0	0	0.12052	0.68961
Cct2	4	0.50077	1.8594	0	0	0.062967	0.67147
Vps16	4	0.49963	2.1819	0	0	0.029119	0.67147
Snapc1	4	0.49836	1.9522	0	0	0.050915	0.67147
Rps3a1	4	0.498	1.0194	0	0	0.30801	0.79023
Cap1	4	0.49566	2.2741	0	0	0.022957	0.67147
Wdr82	4	0.49558	2.3095	0	0	0.020918	0.67147
Gpn2	4	0.49303	2.4821	0	0	0.013061	0.67147
Gmppb	4	0.49249	1.9499	0	0	0.05119	0.67147
Cops3	4	0.49212	1.9545	0	0	0.050637	0.67147
Fau	4	0.49202	1.5656	0	0	0.11744	0.68961
Smc1a	4	0.49198	2.0091	0	0	0.044524	0.67147
Mcm7	4	0.48823	1.9329	0	0	0.053246	0.67147
Ube2l3	4	0.48794	1.8694	0	0	0.061572	0.67147
Rangap1	4	0.48682	2.1455	0	0	0.031909	0.67147
Krtap4-13	4	0.48603	1.8755	0	0	0.060722	0.67147
Hjurp	4	0.48582	1.901	0	0	0.057298	0.67147
Gps1	4	0.4847	1.9362	0	0	0.052843	0.67147
Exoc8	4	0.48464	2.2905	0	0	0.021992	0.67147
Gm11237	4	0.48389	1.7564	0	0	0.079013	0.67147
Polr2i	4	0.48374	1.6456	0	0	0.099846	0.67975
Rnf20	4	0.48372	1.9909	0	0	0.046491	0.67147
Rab12	4	-0.48309	-4.3572	0	0	1.3176e-05	0.038958
Rfc2	4	0.48019	2.0126	0	0	0.044155	0.67147
Kif11	4	0.47994	1.4267	0	0	0.15367	0.70623
Wdr73	4	0.47786	2.0236	0	0	0.043011	0.67147
Nup160	4	0.47715	1.742	0	0	0.081509	0.67147
Zpr1	4	0.47555	2.18	0	0	0.029255	0.67147
Ccdc101	4	0.47461	2.4091	0	0	0.01599	0.67147
Arid5b	4	0.47416	2.3428	0	0	0.019139	0.67147
Med30	4	0.47274	1.7737	0	0	0.076116	0.67147
Atp5d	4	0.47271	1.696	0	0	0.08989	0.67566
Hist2h3c2	4	0.47167	1.3351	0	0	0.18186	0.72254
Sptlc2	4	-0.47159	-4.5987	0	0	4.2509e-06	0.016727
Rps27rt	4	0.47093	1.701	0	0	0.088952	0.67496
Ywhae	4	-0.47063	-2.7134	0	0	0.0066598	0.67147
Supt6	4	0.4704	1.6502	0	0	0.098912	0.67975
Dpagt1	4	0.46951	2.0457	0	0	0.040787	0.67147
Metap2	4	0.4695	1.5282	0	0	0.12647	0.6929
Romo1	4	0.46917	2.1049	0	0	0.035302	0.67147
Col4a3bp	4	-0.46809	-2.7516	0	0	0.0059298	0.67147
Smu1	4	0.46765	2.141	0	0	0.03227	0.67147
Eprs	4	0.46737	1.6516	0	0	0.098606	0.67975
Ruvbl2	4	0.46717	1.5737	0	0	0.11555	0.68874
Iscu	4	0.46702	2.1584	0	0	0.030898	0.67147
Hist1h2bn	4	0.46702	1.3942	0	0	0.16327	0.7123
Gm14346	4	0.46688	2.0047	0	0	0.044997	0.67147
Rpl10	4	0.46563	1.5483	0	0	0.12155	0.68961
Hist1h2bp	4	0.46523	1.2728	0	0	0.20307	0.73581
Pfdn2	4	0.46333	2.3945	0	0	0.016641	0.67147
Cbfb	4	0.46275	2.2414	0	0	0.025001	0.67147
Pfdn6	4	0.46273	2.2051	0	0	0.027446	0.67147
Hist1h2ai	4	0.46259	1.8307	0	0	0.067147	0.67147
Cpsf3l	4	0.46243	2.0293	0	0	0.042424	0.67147
Vac14	4	0.46238	2.3322	0	0	0.019692	0.67147
Chm	4	-0.44685	-4.1526	0	0	3.2876e-05	0.064684
Ric8	4	-0.44496	-4.6875	0	0	2.7661e-06	0.016727
Alg2	3	0.60761	1.5911	1.0165e-06	8.7719e-05	0.11158	0.68874
Taf2	4	0.459	1.8618	1.0165e-06	8.7719e-05	0.062627	0.67147
Tuba1b	4	0.45896	1.4691	1.0165e-06	8.7719e-05	0.1418	0.70424
Kirrel	4	0.45847	2.4841	1.0165e-06	8.7719e-05	0.012986	0.67147
Dad1	4	0.45551	1.8986	1.0165e-06	8.7719e-05	0.057616	0.67147
Ctr9	4	0.45491	1.9887	1.0165e-06	8.7719e-05	0.046735	0.67147
Pold1	4	0.45389	1.9176	1.0165e-06	8.7719e-05	0.055165	0.67147
Snw1	4	0.45325	1.8848	1.0165e-06	8.7719e-05	0.059454	0.67147
Prim2	4	0.45142	1.6754	1.0165e-06	8.7719e-05	0.093856	0.6783
Eif2s3x	4	0.45028	2.128	1.0165e-06	8.7719e-05	0.033335	0.67147
Csnk1a1	4	0.44997	2.3795	1.0165e-06	8.7719e-05	0.017335	0.67147
Nsl1	4	0.44981	1.3638	1.0165e-06	8.7719e-05	0.17263	0.71894
Atp5c1	4	0.44853	1.6502	1.0165e-06	8.7719e-05	0.09891	0.67975
Txnrd1	4	0.4485	2.2887	1.0165e-06	8.7719e-05	0.022095	0.67147
Triap1	4	0.44787	1.9759	1.0165e-06	8.7719e-05	0.048168	0.67147
Prelid1	4	0.44757	1.7575	1.0165e-06	8.7719e-05	0.078838	0.67147
Snrpd1	4	0.44719	1.7461	1.0165e-06	8.7719e-05	0.080794	0.67147
Tbcd	4	0.44664	2.4379	1.0165e-06	8.7719e-05	0.014772	0.67147
Igbp1	4	0.44552	1.5799	1.0165e-06	8.7719e-05	0.11413	0.68874
Speer4c	4	0.44427	1.5524	1.0165e-06	8.7719e-05	0.12056	0.68961
Psmb1	4	0.44395	2.1764	1.0165e-06	8.7719e-05	0.029528	0.67147
Rpl28	4	0.44301	1.5279	1.0165e-06	8.7719e-05	0.12654	0.6929
Eif3e	4	0.44272	2.2734	1.0165e-06	8.7719e-05	0.023001	0.67147
Mrfap1	4	0.44245	2.0731	1.0165e-06	8.7719e-05	0.038163	0.67147
Cirh1a	4	0.44155	1.3995	1.0165e-06	8.7719e-05	0.16165	0.7112
Aars	4	0.44031	2.0156	1.0165e-06	8.7719e-05	0.043838	0.67147
Vprbp	4	0.44008	1.924	1.0165e-06	8.7719e-05	0.05436	0.67147
Dna2	4	0.43974	1.8102	1.0165e-06	8.7719e-05	0.070261	0.67147
Tnpo3	4	0.43924	1.7019	2.033e-06	0.00017316	0.08878	0.67496
Dock1	4	-0.42032	-4.6005	2.033e-06	0.00017316	4.2149e-06	0.016727
Vhl	4	-0.41318	-3.2809	2.033e-06	0.00017316	0.0010349	0.49948
Sf3b5	4	0.43802	1.2831	3.0496e-06	0.00024194	0.19944	0.73387
Eftud2	4	0.43775	1.514	3.0496e-06	0.00024194	0.13004	0.69691
Rpl3	4	0.4371	1.6581	3.0496e-06	0.00024194	0.097302	0.67975
Dut	4	0.43636	1.821	3.0496e-06	0.00024194	0.068609	0.67147
Actg1	4	0.43604	2.419	3.0496e-06	0.00024194	0.015563	0.67147
Csnk2b	4	0.43504	2.1884	3.0496e-06	0.00024194	0.028637	0.67147
Tcp1	4	0.43445	1.6112	3.0496e-06	0.00024194	0.10714	0.68346
Gm9758	4	0.43445	1.6781	3.0496e-06	0.00024194	0.093331	0.6783
Timeless	4	0.43422	2.0194	3.0496e-06	0.00024194	0.043449	0.67147
Ncapd2	4	0.43401	1.9188	3.0496e-06	0.00024194	0.055006	0.67147
Rpl18	4	0.43338	1.1285	3.0496e-06	0.00024194	0.25909	0.76517
Pdcd7	4	0.43289	1.7557	3.0496e-06	0.00024194	0.079136	0.67147
Rpl37a	4	0.43208	1.2623	3.0496e-06	0.00024194	0.20685	0.73795
Spc24	4	0.43167	1.8164	3.0496e-06	0.00024194	0.069307	0.67147
Mup16	4	0.43084	1.8959	3.0496e-06	0.00024194	0.057979	0.67147
Mcm2	4	0.42981	1.5937	3.0496e-06	0.00024194	0.11101	0.68758
Psmd2	4	0.4289	1.7431	3.0496e-06	0.00024194	0.081318	0.67147
Gm13157	3	0.51095	1.8759	4.0661e-06	0.00031496	0.060667	0.67147
Pmpca	4	0.42771	2.1054	4.0661e-06	0.00031496	0.035258	0.67147
Cpsf6	4	0.4265	1.9118	4.0661e-06	0.00031496	0.055908	0.67147
Bysl	4	0.42537	1.4437	4.0661e-06	0.00031496	0.14883	0.7052
Cdan1	4	0.42499	1.9289	4.0661e-06	0.00031496	0.053746	0.67147
Orc5	4	0.424	2.0633	4.0661e-06	0.00031496	0.039084	0.67147
Ccnh	4	0.42316	1.8769	5.0826e-06	0.00039216	0.060538	0.67147
Paf1	4	0.422	1.9514	6.0991e-06	0.0004461	0.051008	0.67147
Supt20	4	0.42153	2.5226	6.0991e-06	0.0004461	0.011648	0.67147
Wdr74	4	0.42114	1.9458	6.0991e-06	0.0004461	0.051679	0.67147
Rpl24	4	0.42067	1.5594	6.0991e-06	0.0004461	0.1189	0.68961
Timm50	4	0.42051	2.156	6.0991e-06	0.0004461	0.031083	0.67147
Letm1	4	0.41973	2.1354	6.0991e-06	0.0004461	0.032732	0.67147
Exosc10	4	0.41965	1.3535	6.0991e-06	0.0004461	0.17588	0.72093
Pdcd10	4	0.41916	2.1986	6.0991e-06	0.0004461	0.027904	0.67147
Timm23	4	0.41864	1.9625	6.0991e-06	0.0004461	0.049703	0.67147
Rpl13	4	0.41703	1.1106	6.0991e-06	0.0004461	0.26675	0.77045
Atp6v1a	4	0.41654	2.1096	6.0991e-06	0.0004461	0.034891	0.67147
Psmg4	4	0.41634	2.592	6.0991e-06	0.0004461	0.0095431	0.67147
D8Ertd738e	4	0.41633	1.3632	6.0991e-06	0.0004461	0.17282	0.71894
F2r	4	-0.39105	-3.1695	6.0991e-06	0.0004461	0.0015271	0.57278
F8a	4	0.41599	2.6137	7.1156e-06	0.00051661	0.0089573	0.67147
Dars	4	0.41521	2.0246	7.1156e-06	0.00051661	0.042912	0.67147
Pik3r4	3	0.47337	1.8416	8.1321e-06	0.00058182	0.065541	0.67147
Psmd14	4	0.41502	2.0217	8.1321e-06	0.00058182	0.043212	0.67147
Med19	4	0.41475	2.3035	8.1321e-06	0.00058182	0.02125	0.67147
Vrk1	4	0.41458	1.9912	8.1321e-06	0.00058182	0.046456	0.67147
1810026J23Rik	4	0.41357	2.2356	9.1487e-06	0.00058824	0.025375	0.67147
Psma2	4	0.41305	1.8032	9.1487e-06	0.00058824	0.071359	0.67147
Bub3	4	0.41291	1.7561	9.1487e-06	0.00058824	0.079066	0.67147
Cenpm	4	0.41273	1.9339	9.1487e-06	0.00058824	0.053124	0.67147
Mrgbp	4	0.41184	2.1338	9.1487e-06	0.00058824	0.032862	0.67147
Atad3a	4	0.41163	2.161	9.1487e-06	0.00058824	0.030695	0.67147
Smc4	4	0.41094	1.7786	9.1487e-06	0.00058824	0.075309	0.67147
Mup1	4	0.41003	1.883	9.1487e-06	0.00058824	0.059697	0.67147
Gm3286	4	0.40875	1.8038	9.1487e-06	0.00058824	0.071268	0.67147
Taf5l	4	0.40871	2.518	9.1487e-06	0.00058824	0.011803	0.67147
Socs3	4	0.40851	2.3366	9.1487e-06	0.00058824	0.019459	0.67147
Gtf3a	4	0.40756	1.6768	9.1487e-06	0.00058824	0.093591	0.6783
Hist1h3f	4	0.40731	1.9879	9.1487e-06	0.00058824	0.046825	0.67147
Hscb	4	0.40721	2.3752	9.1487e-06	0.00058824	0.01754	0.67147
Dis3	4	0.40643	2.0265	9.1487e-06	0.00058824	0.042711	0.67147
Rbm8a	4	0.40391	1.1991	9.1487e-06	0.00058824	0.2305	0.74954
Anapc1	4	0.40381	2.0466	9.1487e-06	0.00058824	0.040702	0.67147
Ccnc	4	0.40356	2.4742	9.1487e-06	0.00058824	0.013355	0.67147
Nup214	4	0.40345	1.7009	9.1487e-06	0.00058824	0.088954	0.67496
Gtf2f2	4	0.40252	2.1498	9.1487e-06	0.00058824	0.031572	0.67147
Gm4836	4	0.40243	1.4646	9.1487e-06	0.00058824	0.14302	0.7046
Erh	4	0.40163	1.8616	9.1487e-06	0.00058824	0.062666	0.67147
Rrm1	4	0.40154	1.5933	9.1487e-06	0.00058824	0.1111	0.68758
Srsf7	4	0.39879	2.1578	9.1487e-06	0.00058824	0.030945	0.67147
Ccm2	4	0.39795	1.6945	9.1487e-06	0.00058824	0.09017	0.67614
Katnb1	4	0.39759	2.228	9.1487e-06	0.00058824	0.025882	0.67147
Cdk7	4	0.39713	2.5437	9.1487e-06	0.00058824	0.01097	0.67147
Mzt1	4	0.39676	2.178	9.1487e-06	0.00058824	0.029408	0.67147
Gm21637	4	0.39675	1.6329	9.1487e-06	0.00058824	0.10249	0.68346
Lmna	4	0.39648	2.122	9.1487e-06	0.00058824	0.033837	0.67147
Ascc3	4	-0.37935	-4.3461	9.1487e-06	0.00058824	1.386e-05	0.038958
Timm44	4	0.39583	1.9098	1.0165e-05	0.00064309	0.056159	0.67147
Yrdc	4	0.39563	1.9341	1.0165e-05	0.00064309	0.053097	0.67147
Arih1	4	0.39549	1.8638	1.0165e-05	0.00064309	0.062346	0.67147
Tada1	4	0.39521	2.5323	1.0165e-05	0.00064309	0.011332	0.67147
Anapc2	4	0.39503	1.8855	1.0165e-05	0.00064309	0.059366	0.67147
Dolpp1	3	0.45941	1.7363	1.1182e-05	0.00070288	0.08251	0.67147
Rbms1	4	-0.37708	-4.0089	1.1182e-05	0.00070288	6.1004e-05	0.092327
Tardbp	4	0.39282	2.1011	1.2198e-05	0.00075	0.035635	0.67147
Vps18	4	0.39177	1.6446	1.2198e-05	0.00075	0.10006	0.68013
Pola1	4	0.3917	1.9003	1.2198e-05	0.00075	0.057392	0.67147
Nutf2	4	0.39146	1.2029	1.2198e-05	0.00075	0.22902	0.74954
Rbbp6	4	0.39126	1.8291	1.2198e-05	0.00075	0.067384	0.67147
Ddb1	4	0.39101	2.1327	1.2198e-05	0.00075	0.032947	0.67147
Crybb3	4	0.39065	2.195	1.2198e-05	0.00075	0.028161	0.67147
4930467E23Rik	4	0.38984	1.546	1.3215e-05	0.0007855	0.1221	0.68961
Hnrnpu	4	0.38981	2.1033	1.3215e-05	0.0007855	0.035438	0.67147
Nae1	4	0.38961	2.2271	1.3215e-05	0.0007855	0.025941	0.67147
Med11	4	0.38928	1.926	1.3215e-05	0.0007855	0.05411	0.67147
Ints9	4	0.38907	1.837	1.3215e-05	0.0007855	0.066214	0.67147
Tpt1	4	0.38829	2.2763	1.3215e-05	0.0007855	0.022826	0.67147
Tonsl	4	0.3878	1.7691	1.3215e-05	0.0007855	0.076877	0.67147
Rbm25	4	0.38775	1.806	1.3215e-05	0.0007855	0.070911	0.67147
Prpf40a	4	0.38757	2.2231	1.3215e-05	0.0007855	0.026206	0.67147
Eif3g	4	0.38737	1.9496	1.3215e-05	0.0007855	0.051219	0.67147
Ap3b1	4	0.38736	2.3248	1.3215e-05	0.0007855	0.020085	0.67147
Ccna2	4	0.38614	2.1386	1.5248e-05	0.00087464	0.032468	0.67147
Vps33a	4	0.38561	2.5479	1.5248e-05	0.00087464	0.010836	0.67147
Nrbp1	4	0.38557	2.4372	1.5248e-05	0.00087464	0.0148	0.67147
E2f1	4	0.38525	1.978	1.5248e-05	0.00087464	0.047932	0.67147
Elovl1	4	0.38522	2.2844	1.5248e-05	0.00087464	0.022349	0.67147
Mcm6	4	0.38465	1.5375	1.5248e-05	0.00087464	0.12416	0.6929
Usp17lc	4	0.38458	2.1202	1.5248e-05	0.00087464	0.033991	0.67147
Atp5e	4	0.38457	1.6092	1.5248e-05	0.00087464	0.10757	0.68383
Hist1h3e	4	0.38406	1.3719	1.5248e-05	0.00087464	0.17008	0.71564
Ppp1r12a	4	0.38389	2.1504	1.5248e-05	0.00087464	0.031525	0.67147
Cnot1	4	0.38374	1.6614	1.5248e-05	0.00087464	0.096624	0.67975
Ebna1bp2	4	0.38338	1.7188	1.5248e-05	0.00087464	0.085643	0.6734
Yars	4	0.38269	1.9502	1.7281e-05	0.00094972	0.051151	0.67147
Ldha	4	0.3825	2.2967	1.7281e-05	0.00094972	0.021635	0.67147
Gm11757	4	0.38246	1.7687	1.7281e-05	0.00094972	0.076938	0.67147
Txn1	4	0.38219	2.1118	1.7281e-05	0.00094972	0.034707	0.67147
Ypel5	4	0.38118	2.4679	1.7281e-05	0.00094972	0.013592	0.67147
Gm10408	4	0.38006	1.7011	1.7281e-05	0.00094972	0.088927	0.67496
Spcs2	4	0.37945	1.7302	1.7281e-05	0.00094972	0.083597	0.67147
Vps4b	4	0.37939	2.0687	1.7281e-05	0.00094972	0.038576	0.67147
Polr2h	4	0.37902	1.542	1.7281e-05	0.00094972	0.12307	0.69101
Chmp6	4	0.37814	1.9717	1.7281e-05	0.00094972	0.04864	0.67147
Stk24	4	0.37804	2.29	1.7281e-05	0.00094972	0.022022	0.67147
Ppp1r2	4	0.37796	1.9582	1.7281e-05	0.00094972	0.050206	0.67147
Gm10147	4	0.37785	1.4746	1.7281e-05	0.00094972	0.14032	0.70408
Tmsb10	4	0.37779	2.1731	1.7281e-05	0.00094972	0.029771	0.67147
Yme1l1	4	0.37771	2.2764	1.7281e-05	0.00094972	0.022819	0.67147
Gpn1	4	0.37681	1.4827	1.8297e-05	0.00099448	0.13815	0.70225
Hist1h3c	4	0.37614	2.0028	1.8297e-05	0.00099448	0.045195	0.67147
Rabif	4	-0.36981	-3.482	1.8297e-05	0.00099448	0.00049764	0.41409
4932438A13Rik	4	-0.3686	-2.889	1.8297e-05	0.00099448	0.0038641	0.67147
Chchd4	4	0.37546	2.1386	1.9314e-05	0.0010468	0.032465	0.67147
Trrap	4	0.37534	1.7806	2.033e-05	0.0010989	0.074977	0.67147
Eif6	4	0.37499	1.97	2.2363e-05	0.0011989	0.048836	0.67147
Polr3e	4	0.37498	1.8483	2.2363e-05	0.0011989	0.064563	0.67147
Wdr26	4	0.37483	2.681	2.2363e-05	0.0011989	0.0073409	0.67147
Rfwd2	4	0.37433	2.6559	2.338e-05	0.0012366	0.0079088	0.67147
Pabpc1	4	0.37422	1.6957	2.338e-05	0.0012366	0.089939	0.67566
Kif23	4	0.37376	1.9564	2.338e-05	0.0012366	0.050424	0.67147
Tfdp1	4	0.37343	2.2185	2.338e-05	0.0012366	0.026519	0.67147
Ap2s1	4	-0.36251	-4.0807	2.338e-05	0.0012366	4.4903e-05	0.080315
Kars	4	0.37309	2.1644	2.4396e-05	0.0012598	0.030437	0.67147
Nbn	4	0.37291	2.159	2.4396e-05	0.0012598	0.030854	0.67147
Cpsf2	4	0.37237	1.7648	2.4396e-05	0.0012598	0.077589	0.67147
Rhox3g	4	0.37208	2.1846	2.4396e-05	0.0012598	0.028918	0.67147
Stag2	4	0.37142	2.5128	2.4396e-05	0.0012598	0.011978	0.67147
Rpl36a	4	0.37037	1.2077	2.4396e-05	0.0012598	0.22717	0.74954
Ykt6	4	0.36984	1.7154	2.4396e-05	0.0012598	0.086269	0.67408
Sf3b6	4	0.36933	1.3905	2.4396e-05	0.0012598	0.16437	0.71279
Psmd13	4	0.36928	1.6836	2.4396e-05	0.0012598	0.092264	0.6783
Cul1	4	0.36884	2.2518	2.5413e-05	0.0012953	0.024335	0.67147
Gm5622	4	0.36872	1.4941	2.5413e-05	0.0012953	0.13514	0.70189
Chaf1a	4	0.3687	2.2582	2.5413e-05	0.0012953	0.023932	0.67147
Hnrnpl	4	0.36852	2.0512	2.5413e-05	0.0012953	0.040251	0.67147
Hypk	4	0.36848	2.1908	2.5413e-05	0.0012953	0.028465	0.67147
Cwc22	4	0.36795	1.6353	2.6429e-05	0.0013402	0.10199	0.68322
Becn1	4	0.36787	1.9714	2.6429e-05	0.0013402	0.048675	0.67147
Hist2h3c1	4	0.36687	1.473	2.8463e-05	0.0014322	0.14076	0.70424
Btg1	4	0.36619	2.2834	2.8463e-05	0.0014322	0.022409	0.67147
Birc5	4	0.36567	1.0315	2.8463e-05	0.0014322	0.30233	0.78895
Atp6v0b	4	0.36527	1.6387	2.9479e-05	0.0014758	0.10127	0.682
Pold3	4	0.36516	1.9456	2.9479e-05	0.0014758	0.051701	0.67147
Eapp	4	0.36484	1.9752	3.0496e-05	0.0015152	0.04824	0.67147
Rpl15	4	0.36459	0.82943	3.0496e-05	0.0015152	0.40686	0.83576
Rpl32	4	0.36449	0.90335	3.0496e-05	0.0015152	0.36634	0.81797
Gm14308	4	0.36324	2.011	3.6595e-05	0.001791	0.04433	0.67147
Rps2	4	0.36323	1.291	3.6595e-05	0.001791	0.19669	0.73182
Akap10	4	0.36298	2.0179	3.6595e-05	0.001791	0.043605	0.67147
Eef1a1	4	0.36287	1.2968	3.6595e-05	0.001791	0.19471	0.7297
Gm8898	4	0.36285	1.6556	3.6595e-05	0.001791	0.09781	0.67975
Cdc6	4	0.36248	1.6389	3.6595e-05	0.001791	0.10124	0.682
Psma4	4	0.36189	1.8313	3.7611e-05	0.0018182	0.067059	0.67147
Gm3139	4	0.36184	2.0882	3.7611e-05	0.0018182	0.03678	0.67147
Med28	4	0.36157	2.5026	3.7611e-05	0.0018182	0.01233	0.67147
Hnrnpa1	4	0.3615	1.6281	3.7611e-05	0.0018182	0.1035	0.68346
Rhox4d	4	0.36129	2.349	3.7611e-05	0.0018182	0.018824	0.67147
Rhox4b	4	0.36074	2.2018	3.9644e-05	0.0019071	0.027681	0.67147
Pmf1	4	0.35991	2.0287	3.9644e-05	0.0019071	0.042484	0.67147
Tubgcp4	4	0.35925	2.1429	4.0661e-05	0.0019324	0.03212	0.67147
Mak16	4	0.35906	1.1267	4.0661e-05	0.0019324	0.25986	0.76539
Slc25a37	4	0.3587	2.1578	4.0661e-05	0.0019324	0.030942	0.67147
Trp53rk	4	0.35869	1.955	4.0661e-05	0.0019324	0.050578	0.67147
Nup155	4	0.35867	1.8225	4.0661e-05	0.0019324	0.068384	0.67147
Exoc1	4	0.35851	2.23	4.1677e-05	0.0019664	0.025747	0.67147
Wdr18	4	0.35843	1.8429	4.1677e-05	0.0019664	0.065345	0.67147
Ulk2	4	0.35831	2.0752	4.1677e-05	0.0019664	0.037971	0.67147
Gpi1	4	0.35692	1.5274	4.371e-05	0.0020331	0.12665	0.6929
Brd7	4	0.35685	2.4789	4.371e-05	0.0020331	0.013178	0.67147
Naa50	4	0.35671	1.8552	4.371e-05	0.0020331	0.063565	0.67147
Mgat1	4	0.35653	2.2041	4.371e-05	0.0020331	0.027518	0.67147
Paxip1	4	0.3564	2.0442	4.371e-05	0.0020331	0.040932	0.67147
Lsm11	4	0.35605	2.1387	4.371e-05	0.0020331	0.03246	0.67147
Rpl30	4	0.35565	1.1981	4.4727e-05	0.0020755	0.23086	0.74954
Xlr5b	4	0.35533	2.1582	4.5743e-05	0.0020957	0.03091	0.67147
Haus3	4	0.35513	1.928	4.5743e-05	0.0020957	0.05385	0.67147
Nupl1	4	0.35456	1.911	4.5743e-05	0.0020957	0.056001	0.67147
Rpl21	4	0.35424	1.0459	4.676e-05	0.0020957	0.29561	0.78488
Rps29	4	0.35411	1.0416	4.676e-05	0.0020957	0.29758	0.7859
Usp8	4	0.35404	1.7597	4.676e-05	0.0020957	0.078467	0.67147
LOC100862015	4	0.35374	1.5296	4.676e-05	0.0020957	0.12612	0.6929
Cdc7	4	0.35361	1.3855	4.676e-05	0.0020957	0.16589	0.71427
Prpf19	4	0.35345	2.0046	4.676e-05	0.0020957	0.045004	0.67147
Gid8	4	0.3533	2.1455	4.676e-05	0.0020957	0.031915	0.67147
Gm5796	4	0.35329	1.286	4.676e-05	0.0020957	0.19844	0.73335
Rad51d	4	0.35284	2.5678	4.676e-05	0.0020957	0.010235	0.67147
Ash2l	4	0.35232	2.3015	4.676e-05	0.0020957	0.021361	0.67147
Hnrnpk	4	0.35225	1.8808	4.676e-05	0.0020957	0.059994	0.67147
Gm12886	4	0.35221	2.4088	4.676e-05	0.0020957	0.016006	0.67147
Ep400	4	0.35188	1.3003	4.8793e-05	0.0021719	0.19351	0.72958
Kin	4	0.35177	2.0073	4.8793e-05	0.0021719	0.044719	0.67147
Tyms	4	0.35166	1.8031	4.8793e-05	0.0021719	0.071366	0.67147
Cdt1	4	0.35005	1.147	5.2859e-05	0.0023423	0.25139	0.76
Prcc	4	0.34994	1.7303	5.2859e-05	0.0023423	0.083574	0.67147
Atg9b	4	0.34949	2.4844	5.3875e-05	0.0023767	0.012979	0.67147
Ninj2	4	0.34923	2.326	5.3875e-05	0.0023767	0.020019	0.67147
Uvrag	4	0.34691	1.997	5.7942e-05	0.0025277	0.04583	0.67147
Dda1	4	0.3469	2.6066	5.7942e-05	0.0025277	0.0091444	0.67147
Smg5	4	0.3469	1.802	5.7942e-05	0.0025277	0.071547	0.67147
Gm17019	4	0.34679	1.6123	5.7942e-05	0.0025277	0.10689	0.68346
Keap1	4	0.34669	1.8189	5.7942e-05	0.0025277	0.068929	0.67147
Zwint	4	0.34605	1.9959	5.8958e-05	0.0025607	0.04595	0.67147
Rpl6	4	0.34571	1.0684	5.8958e-05	0.0025607	0.28532	0.78065
Rpain	4	0.34542	2.1944	5.9975e-05	0.0025991	0.028209	0.67147
Upf1	4	0.34446	1.5029	6.3024e-05	0.0027133	0.13287	0.70094
Ppp1r8	4	0.34419	2.4274	6.3024e-05	0.0027133	0.015209	0.67147
Cacna1c	4	0.34409	2.024	6.3024e-05	0.0027133	0.042965	0.67147
Med27	4	0.3439	2.007	6.4041e-05	0.0027451	0.044749	0.67147
Ddx56	4	0.34367	1.6335	6.4041e-05	0.0027451	0.10236	0.68346
Cse1l	4	0.34351	1.4764	6.5057e-05	0.0027826	0.13983	0.70348
Dtnbp1	4	0.34328	1.9792	6.6074e-05	0.00282	0.047791	0.67147
Uxt	4	0.34279	2.1207	6.709e-05	0.0028571	0.033948	0.67147
Evi5	4	-0.34282	-4.278	6.8107e-05	0.0028755	1.8854e-05	0.041218
Hmgb1	4	0.34254	1.4241	6.8107e-05	0.0028755	0.15441	0.70672
Mcm3	4	0.34249	1.7555	6.8107e-05	0.0028755	0.079176	0.67147
1700001F09Rik	4	0.34246	1.1812	6.8107e-05	0.0028755	0.23751	0.75505
Flcn	4	0.34202	2.2374	7.014e-05	0.002955	0.025259	0.67147
Fam47c	4	0.34133	2.216	7.6239e-05	0.0032051	0.026695	0.67147
Meaf6	4	0.34091	2.2047	7.7255e-05	0.0032409	0.027473	0.67147
Ncbp2	4	0.34063	1.9679	7.8272e-05	0.0032558	0.049081	0.67147
Exoc7	4	0.3403	2.1613	7.8272e-05	0.0032558	0.030675	0.67147
Exosc5	4	0.33996	1.8009	7.8272e-05	0.0032558	0.071721	0.67147
Rab1	4	0.3399	2.0596	7.8272e-05	0.0032558	0.039438	0.67147
Aldoa	4	0.33965	1.3064	7.9288e-05	0.0032911	0.19141	0.7287
Vmp1	4	0.33932	1.8883	8.0305e-05	0.0033193	0.058979	0.67147
Nr2f2	4	-0.33814	-3.5994	8.0305e-05	0.0033193	0.000319	0.33083
Gins4	4	0.33818	1.8297	8.2338e-05	0.0033962	0.067291	0.67147
Prim1	4	0.33793	2.0326	8.4371e-05	0.0034728	0.042092	0.67147
Rad21	4	0.33699	2.2036	8.6404e-05	0.0035417	0.027551	0.67147
Smarca5	4	0.33666	2.4195	8.6404e-05	0.0035417	0.015542	0.67147
Rpa2	4	0.33634	1.5652	8.8437e-05	0.00361	0.11754	0.68961
Pnn	4	0.33624	2.1688	8.8437e-05	0.00361	0.0301	0.67147
Tsc1	4	0.33545	2.2269	8.9454e-05	0.0036364	0.025954	0.67147
Epb4.1l2	4	0.3354	1.9151	8.9454e-05	0.0036364	0.055482	0.67147
Chmp3	4	0.33535	2.3772	9.047e-05	0.0036701	0.017446	0.67147
Lin9	4	0.33476	1.9026	9.4536e-05	0.0038193	0.057099	0.67147
Clp1	4	0.33469	2.1748	9.4536e-05	0.0038193	0.029645	0.67147
Ssrp1	3	0.39767	1.508	0.00010368	0.0041803	0.13156	0.69929
Ppp1r35	4	-0.33321	-3.0422	0.0001047	0.0041955	0.0023488	0.64963
Nudcd3	4	-0.33288	-2.8185	0.0001047	0.0041955	0.004825	0.67147
Crkl	4	-0.3326	-3.3835	0.0001047	0.0041955	0.00071558	0.41409
Snrpd2	4	0.33211	1.7106	0.00010572	0.0042276	0.087147	0.67443
Naa35	4	0.33164	1.0617	0.00010673	0.004251	0.28836	0.78191
Eif3c	4	0.3316	2.0338	0.00010673	0.004251	0.041969	0.67147
Haus4	4	0.33148	2.3647	0.00010775	0.0042742	0.018045	0.67147
Cdk4	4	0.33107	1.8603	0.00010775	0.0042742	0.062836	0.67147
Sf3b4	4	0.33056	2.557	0.00011182	0.0044	0.010559	0.67147
Rbbp4	4	0.33029	2.2963	0.00011182	0.0044	0.021657	0.67147
Orc6	4	0.33021	0.99933	0.00011182	0.0044	0.31763	0.7948
Psmb5	4	0.33011	1.4393	0.00011182	0.0044	0.15006	0.7052
Srp19	4	-0.33033	-1.3855	0.00011283	0.0044311	0.1659	0.71427
Sdad1	4	0.32991	1.3278	0.00011385	0.0044444	0.18424	0.72546
Mrpl12	4	0.32981	2.5746	0.00011385	0.0044444	0.010034	0.67147
Eif2b4	4	0.32965	1.5873	0.00011385	0.0044444	0.11244	0.68874
Dyrk1a	4	-0.32904	-4.2847	0.00011588	0.0045149	1.8302e-05	0.041218
Psmd4	4	0.32918	1.4519	0.00011995	0.004664	0.14653	0.7052
Nup85	4	0.3289	1.4736	0.000123	0.0047732	0.1406	0.70424
Usp39	4	0.32869	1.6239	0.00012503	0.004833	0.1044	0.68346
Rps10	4	0.32869	1.0795	0.00012503	0.004833	0.28038	0.77643
Chek1	4	0.32749	1.4297	0.00012706	0.0048924	0.1528	0.70533
Rfc1	4	0.32739	0.96274	0.00012706	0.0048924	0.33568	0.80458
Ddx3x	4	0.32734	1.4159	0.00012808	0.0049123	0.15682	0.70872
Atp2b1	4	0.32712	1.959	0.00012808	0.0049123	0.050116	0.67147
Kif18b	4	0.32677	2.1124	0.00013011	0.0049805	0.03465	0.67147
Ap3d1	4	0.32672	2.5056	0.00013113	0.0050097	0.012224	0.67147
Gnl2	4	0.32649	1.7122	0.00013316	0.0050775	0.086868	0.67443
Casp8ap2	4	0.32628	2.1349	0.0001352	0.0051351	0.032772	0.67147
Gm13275	4	0.32625	1.9159	0.0001352	0.0051351	0.055376	0.67147
Mapk14	4	-0.32552	-3.4268	0.00013621	0.0051638	0.00061067	0.41409
Cnot3	4	0.32603	2.1836	0.00013723	0.0051923	0.02899	0.67147
Atp6v0d1	4	0.32552	2.0106	0.00013825	0.0052207	0.04437	0.67147
Orc4	4	0.32519	1.9051	0.00013926	0.005239	0.056772	0.67147
Sprtn	4	0.32497	1.6787	0.00013926	0.005239	0.093206	0.6783
Hist1h2ap	4	0.32485	1.7895	0.0001413	0.0052952	0.073535	0.67147
Zfp202	4	0.32477	2.0205	0.0001413	0.0052952	0.043329	0.67147
Polr3c	4	0.32383	1.8818	0.00014638	0.0054753	0.059857	0.67147
Syvn1	4	0.32366	2.2504	0.0001474	0.0055028	0.024423	0.67147
Ldlr	4	-0.32384	-3.4329	0.00014841	0.0055303	0.00059724	0.41409
Nup107	4	0.32299	1.9029	0.00015146	0.0056333	0.057053	0.67147
Skint7	4	0.32257	1.9784	0.00015553	0.0057736	0.047888	0.67147
Mup9	4	0.32118	1.0404	0.00016264	0.0060264	0.29817	0.7867
Hsp90b1	4	-0.32132	-3.4151	0.00016874	0.0062289	0.00063749	0.41409
Med15	4	0.32072	1.9064	0.00016874	0.0062289	0.056603	0.67147
Tamm41	4	0.32048	1.9823	0.00017179	0.0063296	0.047451	0.67147
Smarca4	4	0.31982	2.285	0.00017281	0.0063551	0.022313	0.67147
Med14	4	0.31976	2.0921	0.00017382	0.0063569	0.036432	0.67147
Ubr4	4	0.31965	1.9596	0.00017382	0.0063569	0.050044	0.67147
Napa	4	0.31964	1.4858	0.00017382	0.0063569	0.13734	0.70189
Yae1d1	4	0.31924	1.5725	0.00017891	0.0065306	0.11584	0.68874
Naa30	4	0.31908	1.8252	0.00018094	0.0065804	0.067964	0.67147
Polr3h	4	0.31903	1.9668	0.00018094	0.0065804	0.049208	0.67147
Supv3l1	4	0.31824	1.9772	0.00018399	0.006679	0.048016	0.67147
Anxa2	4	0.31763	2.0389	0.00018602	0.0067403	0.041459	0.67147
Sgpp2	4	0.31761	2.3808	0.00018704	0.0067647	0.017273	0.67147
Cenpw	4	0.31696	1.4464	0.00019009	0.0068624	0.14806	0.7052
Ubap1	4	0.31548	2.4046	0.00020025	0.0071898	0.016192	0.67147
Polr2f	4	0.31536	1.8162	0.00020025	0.0071898	0.069339	0.67147
Casc5	4	0.31525	2.2967	0.00020025	0.0071898	0.021637	0.67147
Polr1b	4	0.31467	1.3169	0.00020432	0.0073091	0.18786	0.72563
Fnbp4	4	0.31459	2.2921	0.00020432	0.0073091	0.021899	0.67147
Psmd6	4	0.31446	1.3463	0.00020534	0.0073321	0.17822	0.72159
Mios	4	-0.31677	-3.2054	0.00020635	0.0073551	0.0013488	0.54157
Psmc6	4	0.3141	1.5019	0.00020737	0.0073779	0.13313	0.70094
Ncaph	4	0.31406	1.679	0.00020839	0.0073874	0.093147	0.6783
Rpl35	4	0.31405	1.0093	0.00020839	0.0073874	0.31281	0.79277
Gtf3c3	4	0.31381	2.3365	0.00021042	0.007446	0.019465	0.67147
Gm3500	4	0.31351	1.5998	0.00021347	0.0075404	0.10964	0.68572
Cenpn	4	0.31344	1.9068	0.00021449	0.0075492	0.056545	0.67147
Kdm1a	4	0.31338	2.5779	0.00021449	0.0075492	0.0099408	0.67147
Gm14434	4	0.31313	2.0046	0.00021652	0.0075936	0.045007	0.67147
Gm14440	4	0.31304	1.5686	0.00021652	0.0075936	0.11674	0.68952
Nubp1	4	0.31297	1.6218	0.00021753	0.0076157	0.10485	0.68346
Hist1h2ab	4	0.31272	1.9154	0.0002216	0.0077442	0.055437	0.67147
Ppp2r1b	4	0.31245	1.8262	0.00022262	0.007766	0.067819	0.67147
Sfpq	4	0.31207	1.7889	0.00022363	0.0077876	0.073636	0.67147
Defb46	4	0.31195	1.8274	0.00022567	0.0078445	0.06764	0.67147
Med8	4	0.31106	1.9839	0.00023075	0.007993	0.04727	0.67147
Tubgcp2	4	0.31101	1.8157	0.00023075	0.007993	0.06941	0.67147
Mcmbp	4	0.31075	1.9806	0.00023278	0.008042	0.047638	0.67147
Rabgef1	4	0.31058	2.1361	0.0002338	0.008042	0.032671	0.67147
Sympk	4	0.31055	1.7431	0.0002338	0.008042	0.081313	0.67147
Pcdhga4	4	0.31055	2.3635	0.0002338	0.008042	0.018104	0.67147
Psmc4	4	0.3105	1.439	0.00023482	0.0080628	0.15014	0.7052
Ints3	4	0.31026	2.1902	0.0002399	0.008223	0.028513	0.67147
Sf3a1	3	0.36834	1.5981	0.00024091	0.0082292	0.11002	0.68624
3300002I08Rik	4	0.30997	2.0297	0.00024091	0.0082292	0.042389	0.67147
Rps28	4	0.30968	0.97667	0.00024193	0.0082496	0.32873	0.80057
Prpf8	4	0.3096	1.0935	0.00024295	0.0082556	0.27419	0.77244
Gmcl1l	4	0.30954	1.5281	0.00024295	0.0082556	0.12648	0.6929
Itgav	4	-0.3135	-2.4129	0.00024498	0.0082818	0.015825	0.67147
Polr1a	4	0.30942	1.4522	0.00024498	0.0082818	0.14644	0.7052
Dync1i2	4	0.3094	2.2255	0.00024498	0.0082818	0.026046	0.67147
Rhox4g	4	0.30937	2.0308	0.00024701	0.0083219	0.042274	0.67147
U2af2	4	0.30928	1.7193	0.00024701	0.0083219	0.085564	0.67339
Lcorl	4	0.30909	2.4192	0.00024803	0.0083419	0.015554	0.67147
Prmt5	4	0.30864	2.5759	0.00024905	0.0083618	0.0099989	0.67147
Palb2	4	0.30818	1.9843	0.00025108	0.0084157	0.04722	0.67147
Nkiras2	4	-0.31238	-3.3117	0.00025616	0.0085714	0.0009274	0.46786
Eif2b5	4	0.30733	1.1623	0.00025718	0.0085908	0.2451	0.75863
Edc4	4	0.30727	2.1633	0.0002582	0.0086102	0.03052	0.67147
Ppp2r2a	4	-0.31187	-3.5185	0.00026226	0.008731	0.00043402	0.40664
Mis12	4	0.30655	2.1128	0.00026429	0.0087838	0.034622	0.67147
Chmp2a	4	0.30649	0.65995	0.00026734	0.0088702	0.50929	0.87727
Pop5	4	0.3064	1.9135	0.00026836	0.0088889	0.055681	0.67147
A4galt	4	0.30609	1.944	0.00027243	0.0090084	0.051893	0.67147
Eef1g	4	0.30578	1.6975	0.00027649	0.0091275	0.089608	0.67563
Ltbp1	4	-0.31042	-3.3451	0.00027954	0.0092127	0.00082245	0.42726
Psmc2	4	0.30545	1.7584	0.00028158	0.0092642	0.078685	0.67147
Deb1	4	0.30518	1.1922	0.00028564	0.0093823	0.23317	0.75047
Otop2	4	0.30496	1.5304	0.00028767	0.0094333	0.12592	0.6929
Atp6v1e1	4	0.30484	1.7413	0.00028869	0.0094509	0.081636	0.67147
Mtbp	4	0.30412	2.1433	0.00029682	0.009701	0.032092	0.67147
Mat2a	4	0.30369	2.0782	0.00030292	0.009868	0.037695	0.67147
Ppil4	4	0.30359	1.9732	0.00030394	0.009868	0.04847	0.67147
Rsl24d1	4	0.30356	1.6116	0.00030394	0.009868	0.10706	0.68346
Gm8677	4	0.30344	1.9716	0.00030394	0.009868	0.048659	0.67147
Tipin	4	0.30336	1.6171	0.00030597	0.0099176	0.10586	0.68346
Elmsan1	4	-0.30793	-3.2523	0.00030801	0.0099671	0.0011447	0.52376
Cdc42	4	-0.30774	-3.599	0.00031004	0.010016	0.00031948	0.33083
Loxhd1	4	-0.30755	-2.2717	0.0003141	0.010131	0.023104	0.67147
Magoh	4	0.30235	1.3046	0.00031715	0.010213	0.19204	0.72904
St3gal5	4	0.30223	2.3425	0.00031919	0.010261	0.019157	0.67147
Ebp	4	0.30197	2.1672	0.00032224	0.010343	0.030223	0.67147
Psmd12	4	0.30109	1.8168	0.00033139	0.010619	0.069243	0.67147
Rragc	4	0.30103	2.619	0.0003324	0.010634	0.0088195	0.67147
Rps26	4	-0.30519	-1.921	0.00033748	0.010777	0.054733	0.67147
Emg1	4	0.3006	1.2336	0.0003385	0.010777	0.21734	0.74593
Actr5	4	0.30059	2.1004	0.0003385	0.010777	0.035689	0.67147
Ube2g2	4	0.30035	2.5356	0.00034663	0.010997	0.011227	0.67147
Rhox4e	4	0.30029	2.3596	0.00034663	0.010997	0.018293	0.67147
Timm13	4	0.30022	1.9801	0.00034765	0.010997	0.047691	0.67147
Cep192	4	0.30021	2.0411	0.00034765	0.010997	0.04124	0.67147
Ints8	4	0.29979	1.7722	0.00034968	0.011026	0.076363	0.67147
Cpsf4	4	0.2997	1.6458	0.00034968	0.011026	0.09981	0.67975
Rbmxl1	4	0.29948	1.5403	0.0003507	0.01104	0.12349	0.69129
Pik3c2a	4	-0.30403	-3.4082	0.00035273	0.011086	0.00065396	0.41409
Prkch	4	0.2989	2.2302	0.00035781	0.011228	0.025734	0.67147
Nip7	4	0.29855	1.4237	0.00035883	0.011242	0.15453	0.70672
Olfr1330	4	0.29825	1.6161	0.00036595	0.011447	0.10608	0.68346
Tbcb	3	0.3533	1.7501	0.00037408	0.011683	0.080096	0.67147
Sec61b	4	-0.3019	-3.6002	0.00037713	0.011759	0.00031799	0.33083
Mthfd2l	4	0.2977	2.1137	0.00037814	0.011772	0.034537	0.67147
Map3k14	4	-0.30177	-2.3263	0.00037916	0.011785	0.020004	0.67147
Vps25	4	0.29748	1.9405	0.00038119	0.01183	0.052317	0.67147
Gm4133	4	0.29698	0.99942	0.00038526	0.011937	0.31759	0.7948
Mfap1b	4	0.29658	1.504	0.00038831	0.011987	0.13259	0.70094
Fgf5	4	0.29656	1.9823	0.00038933	0.011987	0.04744	0.67147
Dhrs2	4	0.29648	2.3635	0.00038933	0.011987	0.018101	0.67147
Foxf2	4	0.29633	2.6675	0.00038933	0.011987	0.0076428	0.67147
Npc1	4	0.29619	2.351	0.00039238	0.012062	0.018721	0.67147
Nifk	4	0.29557	1.8751	0.00040559	0.012422	0.060784	0.67147
Defa-rs1	4	0.29552	1.6106	0.00040559	0.012422	0.10727	0.68346
Rad23b	4	0.29538	2.5371	0.00040661	0.012422	0.011177	0.67147
Hspa9	4	0.29537	1.6755	0.00040661	0.012422	0.093834	0.6783
Gm10922	4	0.29519	2.0391	0.00040966	0.012496	0.041436	0.67147
Ncoa5	4	-0.29984	-3.8216	0.00041169	0.012539	0.00013261	0.17394
Telo2	4	0.29473	2.0619	0.00041982	0.012747	0.039216	0.67147
Rnf183	4	0.2947	2.5273	0.00041982	0.012747	0.011493	0.67147
Zfp808	4	0.29458	1.8331	0.00042186	0.012789	0.066786	0.67147
Gm11758	4	0.29442	2.2863	0.00042389	0.012831	0.022234	0.67147
Cog4	4	0.29431	1.5932	0.0004249	0.012842	0.11112	0.68758
Sf1	4	0.29427	1.3738	0.00042592	0.012853	0.1695	0.71564
Bub1	4	0.29393	2.219	0.00043202	0.013008	0.02649	0.67147
Med17	4	0.29388	2.1929	0.00043304	0.013008	0.028315	0.67147
Ahctf1	4	0.29374	1.8434	0.00043304	0.013008	0.065278	0.67147
Traf2	4	0.29337	2.2992	0.00043812	0.01314	0.021491	0.67147
Chordc1	4	-0.29838	-2.9117	0.00044117	0.013212	0.0035945	0.67147
Dhfr	4	0.29311	2.1241	0.0004432	0.013252	0.033659	0.67147
Cars	3	0.34704	1.6772	0.00044828	0.013364	0.093494	0.6783
Gm14347	4	0.2929	1.3947	0.00044828	0.013364	0.1631	0.7123
Adrbk1	4	-0.29764	-1.3428	0.00045337	0.013495	0.17935	0.72213
Ptbp2	4	-0.29709	-2.2796	0.00045845	0.013625	0.022633	0.67147
Rps23	4	-0.29678	-1.1092	0.00046557	0.013795	0.26733	0.77045
Pkn2	4	-0.29678	-2.5354	0.00046557	0.013795	0.011233	0.67147
Polk	4	0.29159	1.9091	0.0004737	0.014015	0.056246	0.67147
Rfc4	4	0.29088	1.4619	0.0004859	0.014333	0.14378	0.7046
Opa1	4	0.29086	2.4798	0.0004859	0.014333	0.013144	0.67147
Ctps	4	0.29064	2.2414	0.00048895	0.01438	0.024999	0.67147
Cdc45	4	0.29041	1.1461	0.00048895	0.01438	0.25177	0.76035
Senp2	4	0.29028	1.9741	0.00049301	0.014478	0.048371	0.67147
Aldh4a1	4	-0.2944	-3.565	0.00049911	0.014635	0.0003639	0.35798
Bpifb6	4	0.28995	2.0952	0.00050013	0.014643	0.036153	0.67147
Gm15284	4	0.28986	1.5636	0.00050318	0.01471	0.11791	0.68961
Zbtb7a	4	0.28977	2.3184	0.00050521	0.014726	0.020429	0.67147
Znhit2	4	0.28973	1.5143	0.00050521	0.014726	0.12996	0.69689
Hoxc13	4	0.28918	2.7908	0.00051233	0.014911	0.0052581	0.67147
Nfs1	4	0.28903	1.5184	0.00051741	0.015037	0.12891	0.69588
Gle1	4	0.28888	1.995	0.00052046	0.015103	0.046039	0.67147
Vmn2r41	4	0.28853	1.8014	0.00052452	0.015176	0.071645	0.67147
Mybl2	4	0.2885	1.9651	0.00052452	0.015176	0.0494	0.67147
Mtmr6	4	0.2883	1.3391	0.00052656	0.015213	0.18053	0.72213
Rnf146	4	0.2879	2.5934	0.00053469	0.015425	0.009502	0.67147
Mccc2	4	0.2873	2.1966	0.00054689	0.015754	0.028051	0.67147
Mrps7	4	0.2869	2.0067	0.00055909	0.016082	0.044784	0.67147
Cenph	4	0.28677	1.6682	0.00056112	0.016117	0.095279	0.67975
Ppic	4	-0.29162	-2.8349	0.00056213	0.016122	0.0045838	0.67147
Rpl8	4	-0.29155	-0.96705	0.00056518	0.016145	0.33352	0.80362
Mad2l1bp	4	-0.29143	-2.5208	0.0005662	0.016145	0.011708	0.67147
Tada2b	4	0.2863	2.3569	0.0005662	0.016145	0.018427	0.67147
Trmt61a	4	0.28622	2.1667	0.0005662	0.016145	0.030258	0.67147
Rhox3a	4	0.28594	1.6768	0.00057332	0.016324	0.093584	0.6783
Thpo	4	0.28559	1.9699	0.0005784	0.016445	0.048853	0.67147
Heatr3	4	0.28545	1.7836	0.00057942	0.01645	0.074495	0.67147
Pomp	4	0.28512	2.0301	0.00058145	0.016484	0.042347	0.67147
Hinfp	4	0.285	1.7435	0.00058551	0.016576	0.081247	0.67147
Cct3	4	0.28496	1.6732	0.00058653	0.01658	0.09428	0.6783
Rpl35a	4	0.28487	0.82958	0.00058958	0.016643	0.40677	0.83576
Polr1c	4	0.28481	1.5726	0.00059263	0.016705	0.11582	0.68874
Mybbp1a	4	0.28476	1.7666	0.00059466	0.016719	0.077298	0.67147
Zfp414	4	0.28467	2.3297	0.00059568	0.016719	0.01982	0.67147
Mrpl16	4	0.28464	2.1959	0.00059568	0.016719	0.028099	0.67147
Haus5	4	0.28443	2.1422	0.00059873	0.016781	0.032175	0.67147
Pdcl	4	-0.29003	-3.0586	0.0006028	0.016803	0.0022239	0.64756
Mms22l	4	0.28434	2.2642	0.00060076	0.016803	0.023559	0.67147
Stag1	4	0.28418	2.3365	0.00060381	0.016803	0.019467	0.67147
Dand5	4	0.28413	1.9064	0.00060381	0.016803	0.056594	0.67147
Timm9	4	0.28413	2.0523	0.00060381	0.016803	0.040139	0.67147
Taz	4	0.28408	2.0899	0.00060483	0.016808	0.036623	0.67147
Hsd17b13	4	0.28393	1.7107	0.00060788	0.016869	0.087141	0.67443
Kifc1	4	0.28369	1.7756	0.00061499	0.017042	0.075798	0.67147
Cdk2	4	0.28341	1.758	0.00061601	0.017046	0.078748	0.67147
Ppie	4	0.28317	1.7646	0.00061804	0.017055	0.077634	0.67147
Plxna1	4	0.28316	2.7415	0.00061804	0.017055	0.0061153	0.67147
Vps52	4	0.28289	1.9862	0.00062313	0.017171	0.047013	0.67147
Cwf19l2	4	0.28234	1.7783	0.00064447	0.01767	0.075354	0.67147
Pelp1	4	0.28231	1.4796	0.00064651	0.01767	0.13897	0.70261
Top2a	4	0.28229	1.346	0.00064651	0.01767	0.17829	0.72159
Rpp38	4	0.28219	1.2454	0.00064752	0.01767	0.21299	0.74355
Rfc5	4	0.28217	1.84	0.00064752	0.01767	0.065775	0.67147
Heatr1	4	0.28216	1.2143	0.00064752	0.01767	0.22462	0.74954
Psap	4	0.28215	2.9785	0.00064752	0.01767	0.002897	0.67147
4732456N10Rik	4	0.28192	1.9406	0.00065057	0.017729	0.052305	0.67147
Gm3558	4	0.28186	0.54601	0.00065159	0.017732	0.58506	0.9011
Cisd3	4	0.28167	2.0207	0.00065565	0.017818	0.043308	0.67147
Krtap4-7	4	0.2815	1.7828	0.00066379	0.018014	0.074626	0.67147
Col3a1	4	0.28126	2.2446	0.00066785	0.018099	0.024793	0.67147
Shoc2	4	-0.28597	-2.3726	0.00068208	0.018358	0.017661	0.67147
Wars	4	0.28085	1.6275	0.00068107	0.018358	0.10364	0.68346
Pagr1a	4	0.28084	1.6788	0.00068107	0.018358	0.093193	0.6783
Iars	4	0.28082	1.6827	0.00068208	0.018358	0.092435	0.6783
Top3a	4	0.28081	1.5598	0.00068208	0.018358	0.1188	0.68961
Pola2	4	0.28067	1.4454	0.00068412	0.018363	0.14834	0.7052
Rpl18a	4	0.28067	0.6381	0.00068412	0.018363	0.52341	0.88109
Gm2927	4	0.28065	1.7968	0.00068513	0.018365	0.072362	0.67147
Pvrl2	4	0.27993	2.1331	0.00070546	0.018884	0.032914	0.67147
Vps29	4	-0.28498	-2.7674	0.00071258	0.019049	0.0056506	0.67147
Smarcb1	4	0.27972	2.0716	0.00071665	0.019132	0.038301	0.67147
Fam98c	4	0.27932	2.0233	0.00072884	0.019431	0.043044	0.67147
Terf1	4	0.27896	1.5756	0.00074104	0.019703	0.11512	0.68874
Olfr1306	4	0.27894	1.7548	0.00074104	0.019703	0.079295	0.67147
Brcc3	4	0.27862	2.0714	0.00074816	0.019838	0.038319	0.67147
Apob	4	0.27857	2.0515	0.00074816	0.019838	0.040218	0.67147
Polr2d	4	0.27853	1.7745	0.00075121	0.019892	0.075989	0.67147
Bap1	4	-0.28282	-2.6171	0.00076442	0.020215	0.0088679	0.67147
Psmb3	4	0.27786	1.3963	0.00077255	0.020402	0.16261	0.7123
Prkar1b	4	0.27774	2.286	0.00077357	0.020402	0.022256	0.67147
Ntsr2	4	-0.28237	-3.5039	0.00077967	0.020535	0.00045856	0.4101
Oip5	4	0.27735	1.8947	0.0007878	0.020722	0.058129	0.67147
Vmn1r36	4	0.27715	1.7656	0.00079187	0.020772	0.07746	0.67147
Psat1	4	0.27711	1.9257	0.00079288	0.020772	0.054147	0.67147
Vars2	4	0.2771	2.7288	0.00079288	0.020772	0.006357	0.67147
Cdc26	4	0.27692	2.238	0.00079695	0.020851	0.025223	0.67147
Ncapd3	4	0.27686	1.7776	0.00079898	0.020875	0.075471	0.67147
Foxc2	4	0.27682	2.2024	0.0008	0.020875	0.027635	0.67147
Parp4	4	0.27656	2.1975	0.0008061	0.020895	0.027981	0.67147
Nrf1	4	0.27655	1.7855	0.0008061	0.020895	0.074187	0.67147
Nufip1	4	0.27654	1.8652	0.0008061	0.020895	0.062159	0.67147
Ube2c	4	0.27651	2.2968	0.00080712	0.020895	0.021629	0.67147
Tspan33	4	0.27651	2.1331	0.00080712	0.020895	0.032916	0.67147
Psmd11	4	0.2765	1.4592	0.00080712	0.020895	0.14452	0.70478
Rapgef1	4	-0.28111	-1.7945	0.00081017	0.020946	0.072735	0.67147
Xpc	4	0.27641	2.2318	0.00081423	0.021024	0.025631	0.67147
Slc35a2	4	0.27627	2.3222	0.00082033	0.021126	0.020223	0.67147
Tm9sf4	4	0.27625	2.3742	0.00082033	0.021126	0.017585	0.67147
Alg11	4	0.27619	1.4365	0.0008244	0.021203	0.15086	0.7052
Ghsr	4	-0.28024	-2.9901	0.00083659	0.021432	0.0027888	0.67147
Cyp7a1	4	0.27584	2.2774	0.00083456	0.021432	0.022764	0.67147
Swsap1	4	0.27576	1.7782	0.00083558	0.021432	0.075377	0.67147
Senp6	4	0.27568	1.8673	0.00084168	0.021534	0.06186	0.67147
Zbtb48	4	0.27533	2.1741	0.00085184	0.021766	0.029696	0.67147
Neurl2	4	-0.2795	-2.6875	0.00085591	0.021813	0.0071984	0.67147
Arl6ip6	4	0.27522	1.7548	0.00085591	0.021813	0.079295	0.67147
Epb4.1l1	4	-0.27911	-2.3828	0.00087014	0.022147	0.01718	0.67147
Gtf2e2	4	0.27485	1.3507	0.00087421	0.022222	0.17678	0.72145
Rpl34	4	0.27481	1.1615	0.00087726	0.022271	0.24546	0.75871
Olfr435	4	0.27437	1.84	0.00089555	0.022706	0.065764	0.67147
Dr1	4	0.27432	1.9922	0.0008986	0.022754	0.046346	0.67147
Depdc7	4	0.27422	1.7373	0.00090064	0.022776	0.082327	0.67147
Wdr24	4	-0.2779	-2.6996	0.00090267	0.022798	0.0069432	0.67147
Speer4b	4	0.27383	2.0523	0.0009108	0.022974	0.040142	0.67147
4921524J17Rik	4	0.27377	2.019	0.00091283	0.022989	0.043491	0.67147
Ube2n	4	0.27367	2.0277	0.00091487	0.022989	0.042587	0.67147
BC055324	4	0.27354	2.2042	0.00091487	0.022989	0.027508	0.67147
Trp53bp2	4	-0.27753	-3.254	0.0009169	0.02301	0.0011379	0.52376
Hist1h2an	4	0.27342	1.6542	0.00091995	0.023057	0.098094	0.67975
Abcf1	4	0.27327	1.4195	0.00092198	0.023079	0.15576	0.70769
Tm4sf5	4	-0.27722	-3.9622	0.00092402	0.0231	7.4269e-05	0.10437
Kctd12b	4	-0.27694	-3.4751	0.00092808	0.023173	0.00051073	0.41409
Ercc3	4	0.27283	2.0121	0.00093011	0.023194	0.044208	0.67147
Prorsd1	4	0.27278	1.9898	0.00093215	0.023215	0.046608	0.67147
Ddx41	4	0.27266	1.3492	0.00093621	0.023287	0.17727	0.72153
Trim28	4	-0.2765	-2.6712	0.00094435	0.02346	0.0075569	0.67147
Mgat2	4	0.27235	1.6843	0.00094638	0.02348	0.092122	0.6783
Zfp763	4	0.27233	2.0122	0.00094841	0.023501	0.044197	0.67147
Ctdspl2	4	0.27161	2.1358	0.00097484	0.024126	0.032699	0.67147
Polr3k	4	0.27137	1.911	0.00098399	0.024322	0.056007	0.67147
Pak1ip1	4	0.27109	1.7779	0.00099212	0.024492	0.075418	0.67147
Rad51	4	0.271	1.2898	0.0009972	0.024586	0.19713	0.73249
Dnaja3	4	0.27093	1.8579	0.00099924	0.024606	0.063183	0.67147
Hist2h3b	4	0.27084	1.2935	0.0010043	0.024694	0.19584	0.73109
Alox8	4	0.27079	2.2673	0.0010053	0.024694	0.023374	0.67147
Pcdh18	4	-0.27478	-2.875	0.0010125	0.024838	0.0040399	0.67147
Nop2	4	0.27057	1.5899	0.0010145	0.024857	0.11186	0.68874
Zfp58	4	0.27056	1.9414	0.0010165	0.024864	0.052208	0.67147
Cmtm6	4	0.27047	1.7595	0.0010186	0.024864	0.078486	0.67147
Ccdc115	4	0.2704	2.1659	0.0010186	0.024864	0.030316	0.67147
Uba2	4	0.27035	1.5642	0.0010206	0.024882	0.11778	0.68961
G6pdx	4	0.27015	2.252	0.0010287	0.02505	0.024321	0.67147
Atad5	4	0.2699	1.8423	0.0010379	0.025241	0.065436	0.67147
Dtwd1	4	0.26967	1.901	0.0010501	0.025506	0.057298	0.67147
Nrp1	4	0.26944	2.6608	0.0010572	0.025633	0.0077944	0.67147
Gtf2h4	4	0.26933	2.1419	0.0010592	0.025633	0.032202	0.67147
Ciao1	4	0.26932	1.7298	0.0010592	0.025633	0.083668	0.67147
Slc7a6os	4	0.26917	1.5044	0.0010643	0.025725	0.13249	0.70094
Ufd1l	4	0.26913	1.5197	0.0010673	0.025767	0.12859	0.69563
Tsnax	4	0.26899	2.0451	0.0010745	0.025907	0.040843	0.67147
Abcf3	4	0.26888	2.6508	0.0010765	0.025924	0.008031	0.67147
Lsm3	4	0.26866	1.7786	0.0010846	0.026088	0.0753	0.67147
Mroh9	4	0.26849	2.4125	0.0010917	0.02622	0.015845	0.67147
Fbxo5	4	0.26846	1.4116	0.0010928	0.02622	0.15808	0.70872
Exosc8	4	-0.27249	-1.1457	0.0010978	0.026277	0.25191	0.76041
Chmp7	4	0.26831	2.043	0.0010978	0.026277	0.041049	0.67147
Hist2h2ac	4	0.26792	1.1929	0.0011161	0.026675	0.2329	0.75008
Rbm28	4	0.2679	1.7104	0.0011172	0.026675	0.087188	0.67443
Hspa8	4	0.26778	1.2781	0.0011202	0.026715	0.20122	0.7358
Hsd3b6	4	0.26759	2.0725	0.0011294	0.026901	0.038218	0.67147
Scd1	3	0.31701	1.881	0.0011314	0.026917	0.059973	0.67147
Faf2	4	0.2675	2.3632	0.0011344	0.026957	0.018118	0.67147
Supt7l	4	0.26724	2.4259	0.0011476	0.027238	0.015271	0.67147
Pam16	4	0.26713	2.4719	0.0011507	0.027268	0.013439	0.67147
Gm5891	4	0.26699	1.4791	0.0011517	0.027268	0.13912	0.70261
Olfr739	4	0.26652	1.8462	0.0011619	0.027443	0.064868	0.67147
Dhx16	4	0.26651	1.2079	0.0011619	0.027443	0.22709	0.74954
Gm4175	4	0.26638	1.5633	0.001169	0.027578	0.11799	0.68961
Zfp488	4	0.2662	2.5266	0.0011751	0.027679	0.011517	0.67147
Anapc11	4	0.26619	2.1293	0.0011761	0.027679	0.033229	0.67147
Ube3b	4	0.26606	2.28	0.0011802	0.027742	0.022608	0.67147
Mup8	4	0.26604	1.1142	0.0011822	0.027757	0.2652	0.77045
Exoc5	4	0.26586	2.5758	0.0011883	0.027867	0.010002	0.67147
Atp6ap1	4	0.26571	2.0873	0.0011975	0.028048	0.036859	0.67147
Rpl12	4	0.26558	1.3232	0.0012015	0.028109	0.18578	0.72551
Defb14	4	0.26543	1.9024	0.0012076	0.028142	0.057122	0.67147
Vit	4	0.26542	1.8456	0.0012076	0.028142	0.064947	0.67147
Hspa12a	4	0.26541	2.074	0.0012086	0.028142	0.038077	0.67147
Mterf1a	4	0.26538	1.8639	0.0012086	0.028142	0.062339	0.67147
Hist1h2ae	4	0.26525	1.7541	0.0012147	0.028251	0.079408	0.67147
Egln1	4	-0.26971	-3.2374	0.0012178	0.028288	0.0012061	0.53932
Cops4	4	0.26504	2.1632	0.00123	0.028538	0.030527	0.67147
Skp1a	4	0.26486	1.4124	0.0012432	0.028776	0.15782	0.70872
Anapc10	4	0.26486	2.3278	0.0012432	0.028776	0.019923	0.67147
Nubp2	4	0.26432	1.6995	0.0012625	0.029189	0.089217	0.67507
Gm14345	4	0.26421	1.1788	0.0012686	0.029296	0.23848	0.75591
Uba1y	4	0.26417	2.0759	0.0012717	0.029297	0.037904	0.67147
Ssu72	4	0.26411	2.1365	0.0012717	0.029297	0.032638	0.67147
H60b	4	0.264	2.0672	0.0012767	0.02938	0.038716	0.67147
Mbtps1	4	0.26382	1.6605	0.0012869	0.029579	0.096805	0.67975
Sel1l	4	0.2638	1.5577	0.00129	0.029615	0.1193	0.68961
Smarcd1	4	0.26378	2.244	0.001292	0.029627	0.024833	0.67147
Ptpn23	4	0.26348	2.0337	0.0013103	0.030012	0.041987	0.67147
Rec8	4	0.26342	2.0715	0.0013123	0.030023	0.038312	0.67147
Arfip2	4	0.26309	2.1671	0.0013296	0.030383	0.030225	0.67147
Sc5d	4	0.26298	2.0711	0.0013388	0.030557	0.038354	0.67147
Zfp934	4	-0.26688	-3.4532	0.0013418	0.030591	0.00055388	0.41409
Pfkm	4	0.26285	1.5764	0.0013459	0.030636	0.11494	0.68874
Mavs	4	0.2628	1.659	0.0013469	0.030636	0.097113	0.67975
Zfp207	4	0.26269	1.6703	0.001351	0.030693	0.094858	0.67907
Vmn1r38	4	0.26249	1.8697	0.0013591	0.030817	0.061522	0.67147
Snf8	4	0.26241	1.9576	0.0013611	0.030817	0.050272	0.67147
Snip1	4	0.26241	1.6456	0.0013611	0.030817	0.099839	0.67975
Cenpo	4	0.2623	2.1729	0.0013672	0.03092	0.029786	0.67147
Tlx2	4	0.26223	2.2512	0.0013693	0.03093	0.024376	0.67147
Vgll4	4	0.26207	1.9586	0.0013733	0.030986	0.050156	0.67147
Gm4301	4	0.26188	0.99629	0.0013855	0.031226	0.31911	0.7948
Cdc123	4	0.26168	2.184	0.0013896	0.031281	0.028961	0.67147
Bmpr1a	4	0.26153	2.0387	0.0013977	0.031393	0.041482	0.67147
Pfdn5	4	0.26149	2.6105	0.0013977	0.031393	0.0090419	0.67147
Aqp3	4	0.26136	2.1223	0.0014069	0.031562	0.033812	0.67147
9130011E15Rik	4	-0.26555	-2.1463	0.0014099	0.031595	0.031853	0.67147
Fen1	4	0.2612	2.1322	0.001414	0.03165	0.032993	0.67147
Skiv2l2	4	0.2611	1.5515	0.0014231	0.031782	0.12078	0.68961
Dnmt1	4	0.26108	1.297	0.0014231	0.031782	0.19464	0.7297
Adh1	4	0.26105	1.7942	0.0014252	0.031791	0.072787	0.67147
Jmjd7	4	0.26085	2.423	0.0014353	0.031982	0.015394	0.67147
Abhd17a	4	0.26075	2.343	0.0014384	0.032014	0.019131	0.67147
Aifm1	4	0.26067	2.3172	0.0014414	0.032045	0.02049	0.67147
Ppa1	4	0.26041	1.8612	0.0014526	0.032257	0.062718	0.67147
Zcchc11	4	0.26037	1.5715	0.0014567	0.032311	0.11608	0.68874
Vmn1r197	4	0.26032	1.9947	0.0014628	0.03241	0.046078	0.67147
Rps6	3	0.3078	0.93474	0.0014689	0.032472	0.34992	0.80882
Vmn1r37	4	0.26022	2.2092	0.0014679	0.032472	0.027164	0.67147
2010107E04Rik	4	0.26011	1.2807	0.001477	0.032615	0.2003	0.73462
Ilkap	4	0.26009	2.315	0.001479	0.032623	0.020616	0.67147
Rps20	3	0.30749	0.81045	0.0014831	0.03264	0.41768	0.84212
Ccnd1	4	0.25999	2.1272	0.0014831	0.03264	0.033405	0.67147
Rps24	4	0.2599	0.8041	0.0014861	0.03267	0.42134	0.84427
Ppfia1	4	0.25983	2.2499	0.0014882	0.032679	0.024452	0.67147
Rrp7a	4	0.25949	1.356	0.0015065	0.032913	0.1751	0.72063
Ece2	4	0.25947	2.0389	0.0015065	0.032913	0.04146	0.67147
Prl3d2	4	0.25946	1.9308	0.0015065	0.032913	0.053506	0.67147
Hist1h4n	4	0.25934	1.797	0.0015095	0.032913	0.072334	0.67147
Fam210a	4	0.2593	2.3547	0.0015095	0.032913	0.018536	0.67147
Actr10	4	0.25925	1.9444	0.0015095	0.032913	0.051848	0.67147
Oraov1	4	0.25922	1.5751	0.0015105	0.032913	0.11522	0.68874
Wars2	4	0.25919	2.4989	0.0015126	0.03292	0.012458	0.67147
Nop10	4	0.259	2.0193	0.0015238	0.033127	0.043459	0.67147
Gtse1	4	0.25893	1.8389	0.0015299	0.033223	0.065932	0.67147
Ccdc84	4	0.25886	1.7876	0.0015329	0.033238	0.073834	0.67147
9130023H24Rik	4	0.2588	1.8077	0.0015339	0.033238	0.070646	0.67147
Rhox2b	4	0.2585	1.7827	0.0015492	0.033524	0.074628	0.67147
Cspp1	4	0.25844	1.9144	0.0015512	0.033524	0.055564	0.67147
Arid2	4	0.25842	2.4645	0.0015522	0.033524	0.013722	0.67147
Eif3m	4	0.25837	1.7438	0.0015563	0.033575	0.081186	0.67147
Arf6	4	0.25832	1.9623	0.0015583	0.033582	0.049729	0.67147
Tulp4	4	-0.26262	-2.3772	0.0015644	0.033676	0.017444	0.67147
Glrx3	4	0.2582	2.0392	0.0015685	0.033719	0.041434	0.67147
Prpf4	4	0.25815	1.5325	0.0015705	0.033719	0.1254	0.6929
Orai2	4	0.25806	1.9996	0.0015715	0.033719	0.045542	0.67147
Fthl17	3	0.30471	1.7617	0.0015929	0.034139	0.078128	0.67147
Rprd1b	4	0.25743	1.9621	0.0016091	0.034413	0.049751	0.67147
Hace1	4	0.2574	2.0592	0.0016091	0.034413	0.039478	0.67147
Usp14	4	0.25732	2.1885	0.0016132	0.034463	0.028636	0.67147
Mycs	4	0.25728	2.0871	0.0016163	0.034475	0.036877	0.67147
Psmb2	4	0.25726	1.363	0.0016173	0.034475	0.17287	0.71894
Srp9	4	-0.2617	-1.4966	0.0016203	0.034486	0.13449	0.70189
Arhgef12	4	-0.26165	-2.7843	0.0016213	0.034486	0.0053644	0.67147
Klhl9	4	-0.26116	-3.2105	0.0016437	0.034924	0.001325	0.54157
Bsdc1	4	0.25673	2.1398	0.0016457	0.03493	0.032372	0.67147
Riiad1	4	0.25654	2.0283	0.0016579	0.035135	0.042529	0.67147
St7l	4	0.25652	2.3955	0.001659	0.035135	0.016595	0.67147
Nedd1	4	0.2564	1.8329	0.001664	0.035166	0.06682	0.67147
Krit1	4	0.25639	1.7882	0.001664	0.035166	0.073747	0.67147
Slfn9	4	-0.2608	-2.8997	0.0016712	0.035279	0.0037352	0.67147
Ifna2	4	0.25609	1.8019	0.0016793	0.035413	0.071563	0.67147
Atp5b	4	0.25578	2.5868	0.0016986	0.035782	0.0096876	0.67147
Gm6460	4	0.25572	1.6571	0.0017027	0.035829	0.0975	0.67975
Fem1c	4	0.25512	2.2874	0.0017311	0.036389	0.022172	0.67147
Gm3604	4	0.25508	1.9124	0.0017342	0.036414	0.055823	0.67147
Olfr1263	4	0.25499	2.1318	0.0017393	0.036482	0.033027	0.67147
Sez6	4	0.25484	2.4319	0.0017504	0.036638	0.01502	0.67147
Cog2	4	0.25484	1.9125	0.0017504	0.036638	0.055807	0.67147
Wasl	4	-0.25944	-3.0698	0.0017647	0.036822	0.0021421	0.64756
Vmn2r31	4	-0.2594	-2.2314	0.0017657	0.036822	0.025653	0.67147
Nploc4	4	0.25468	1.3298	0.0017626	0.036822	0.18357	0.72459
Mterf1b	4	0.25463	1.662	0.0017667	0.036822	0.096515	0.67975
Polr3a	4	0.2543	0.76147	0.0017881	0.037228	0.44637	0.85123
Zfp217	4	0.25372	2.2575	0.0018226	0.037867	0.023977	0.67147
Cops2	4	0.25371	2.0488	0.0018226	0.037867	0.040478	0.67147
Gm10104	3	0.30018	1.6781	0.0018257	0.03789	0.093326	0.6783
Rqcd1	4	-0.25806	-3.046	0.001847	0.038293	0.0023193	0.64963
Nf1	4	0.25335	2.1831	0.0018572	0.038463	0.029028	0.67147
Ica1	4	0.25326	1.8877	0.0018633	0.038549	0.05906	0.67147
Olfr117	4	0.25319	1.9131	0.0018653	0.03855	0.055737	0.67147
Rsbn1	4	0.25306	1.9859	0.0018724	0.038657	0.047049	0.67147
Bud13	4	0.253	1.7938	0.0018785	0.038742	0.072849	0.67147
Olfr847	4	0.25294	2.0715	0.0018816	0.038764	0.038315	0.67147
Abca8b	4	0.25278	2.0377	0.0018968	0.039038	0.041576	0.67147
Tuba1a	4	0.25273	1.0216	0.0019009	0.03908	0.30695	0.79023
Lrrc41	4	0.25257	1.9433	0.001909	0.039166	0.051979	0.67147
Vmn1r86	4	0.25257	2.2095	0.001909	0.039166	0.027142	0.67147
Sec13	4	0.25246	1.6593	0.0019161	0.039271	0.097047	0.67975
Utp11l	4	0.25225	2.0035	0.0019294	0.03948	0.045128	0.67147
Gm10413	4	0.25225	1.8496	0.0019304	0.03948	0.064368	0.67147
Vps53	4	0.25215	2.0682	0.0019375	0.039585	0.038618	0.67147
Mrgprb2	4	0.25209	2.2077	0.0019456	0.039668	0.027268	0.67147
Kifc3	4	0.25208	1.9282	0.0019456	0.039668	0.053829	0.67147
Evi2a	4	0.25203	2.1519	0.0019497	0.03971	0.031404	0.67147
Fgfr3	4	0.25196	1.663	0.0019558	0.039793	0.096304	0.67975
Olfr937	4	0.25183	1.8717	0.0019649	0.039917	0.061248	0.67147
Cherp	4	0.25182	1.9746	0.0019659	0.039917	0.048316	0.67147
Abca7	4	0.25165	2.0669	0.0019792	0.040062	0.038741	0.67147
Gmfb	4	0.25165	2.34	0.0019792	0.040062	0.019283	0.67147
Anapc5	4	0.25164	1.8668	0.0019792	0.040062	0.061931	0.67147
Dctn2	4	0.2516	1.776	0.0019842	0.040123	0.07573	0.67147
Kcnq4	4	0.25133	1.9677	0.0020056	0.040513	0.049101	0.67147
Ces5a	4	0.25114	2.3596	0.0020168	0.040697	0.018293	0.67147
Ppox	4	0.25095	2.6559	0.002029	0.040902	0.0079095	0.67147
Atp6v1g1	4	0.25028	1.6191	0.0020564	0.041412	0.10542	0.68346
Hist1h4j	4	0.24991	1.7499	0.0020869	0.041984	0.080136	0.67147
Noc2l	4	0.24974	1.3719	0.0020971	0.042145	0.17009	0.71564
Lsm8	4	0.24945	2.1179	0.0021245	0.042653	0.034187	0.67147
Bop1	4	0.2494	1.271	0.0021276	0.042665	0.20372	0.73607
Cln8	4	0.24936	2.0016	0.0021316	0.042665	0.045332	0.67147
Nrde2	4	0.24933	1.8807	0.0021316	0.042665	0.060012	0.67147
Preb	4	0.24893	1.5445	0.0021591	0.043171	0.12248	0.69018
Cxxc1	4	0.24889	1.5144	0.0021642	0.043198	0.12993	0.69689
Cldn3	4	0.24885	2.1663	0.0021662	0.043198	0.030289	0.67147
Afap1l2	4	0.24879	1.9869	0.0021672	0.043198	0.046928	0.67147
BC055111	4	0.24876	2.0783	0.0021693	0.043198	0.037682	0.67147
Rpl23	4	-0.2541	-1.0995	0.0021835	0.043438	0.27155	0.77207
Aven	4	0.24855	1.8473	0.0021886	0.043495	0.064697	0.67147
Lyzl4	4	0.2485	2.1146	0.0021916	0.043512	0.034462	0.67147
Alyref	4	0.24841	1.5773	0.0021967	0.043569	0.11472	0.68874
Tpsg1	4	0.24825	1.7988	0.0022038	0.043666	0.072044	0.67147
Eif3h	4	0.24814	2.5727	0.0022079	0.043702	0.010091	0.67147
Zhx2	4	0.24796	2.1407	0.0022191	0.043879	0.032294	0.67147
Chpf2	4	-0.25351	-2.8133	0.0022221	0.043896	0.0049029	0.67147
Lrrc16a	4	-0.2533	-3.0153	0.0022353	0.044112	0.0025669	0.66452
Sp1	4	-0.25315	-3.1688	0.0022475	0.044309	0.0015309	0.57278
Rpa1	4	0.24743	1.4417	0.0022567	0.04442	0.14939	0.7052
Parg	4	0.24742	1.7799	0.0022577	0.04442	0.075098	0.67147
Gpr137b	4	0.24729	0.89226	0.0022658	0.044535	0.37225	0.81951
Eif2s2	4	0.24697	1.7446	0.0022902	0.04497	0.081063	0.67147
N6amt1	4	0.24686	1.1621	0.0023004	0.045125	0.24519	0.75863
Mical2	4	0.24655	2.0231	0.0023309	0.045677	0.043065	0.67147
Zcwpw1	4	-0.25197	-2.2009	0.002337	0.045751	0.027745	0.67147
Slc35a1	4	0.24644	2.1771	0.0023421	0.045805	0.029473	0.67147
4930503E14Rik	4	0.24617	1.605	0.0023685	0.046276	0.10849	0.68522
Kcnh6	4	0.24595	2.2251	0.0023888	0.046627	0.026075	0.67147
Fastkd5	4	-0.25092	-2.8306	0.0024193	0.047129	0.0046454	0.67147
Syngr2	4	0.24562	1.6167	0.0024183	0.047129	0.10594	0.68346
Cst13	4	0.24545	1.9673	0.0024366	0.047418	0.04915	0.67147
Elp5	4	0.24535	2.0206	0.0024488	0.047609	0.043324	0.67147
Abcb7	4	0.24519	1.7125	0.0024651	0.04785	0.086799	0.67443
Hist1h4h	4	0.24513	1.9235	0.0024661	0.04785	0.054415	0.67147
Aldh16a1	4	0.24511	1.6459	0.0024712	0.047901	0.099777	0.67975
Pwwp2b	4	0.24503	2.3066	0.0024742	0.047913	0.021078	0.67147
Mctp1	4	-0.25032	-2.838	0.0024823	0.047929	0.0045396	0.67147
Mfap1a	4	0.24498	1.167	0.0024793	0.047929	0.24323	0.75847
Prkra	4	0.24495	2.0765	0.0024813	0.047929	0.037844	0.67147
Acsl4	4	0.24485	1.5505	0.0024935	0.048098	0.12102	0.68961
Trnt1	4	0.24445	1.9996	0.0025291	0.048737	0.045548	0.67147
Mcm3ap	4	0.24427	2.1998	0.0025403	0.048904	0.027824	0.67147
Cd209c	4	0.24418	2.8823	0.0025494	0.049032	0.0039476	0.67147
Kcnk6	4	0.24406	1.7724	0.0025586	0.04916	0.076323	0.67147
Rps15	4	0.24392	0.84488	0.0025698	0.049327	0.39818	0.83291
Gm609	4	-0.24904	-2.9063	0.0025952	0.049766	0.0036569	0.67147
Crcp	4	0.24361	1.5958	0.0026023	0.049854	0.11053	0.68652
Ttc1	4	0.24356	1.3801	0.0026135	0.050019	0.16754	0.71533
Rps7	4	0.24336	0.81279	0.0026358	0.050398	0.41634	0.84116
Smg1	4	0.24329	1.5591	0.0026409	0.050447	0.11898	0.68961
Vmn2r38	4	0.24319	1.3343	0.0026562	0.050591	0.1821	0.72265
Cenpa	4	0.24318	2.1168	0.0026562	0.050591	0.034279	0.67147
Racgap1	4	0.24318	1.4853	0.0026562	0.050591	0.13747	0.70189
4933402N22Rik	4	0.24311	1.6895	0.0026623	0.050658	0.091126	0.67745
Fuca2	4	0.24293	2.4752	0.0026795	0.050937	0.013317	0.67147
Rgl1	4	0.24282	1.8736	0.0026917	0.05112	0.060991	0.67147
Acd	4	0.24278	1.8593	0.0026968	0.051167	0.062983	0.67147
Imp4	4	0.24263	1.1569	0.00271	0.051319	0.24731	0.75871
Tecr	4	0.24263	1.8268	0.00271	0.051319	0.067732	0.67147
1110004E09Rik	4	0.24243	1.7586	0.0027334	0.051651	0.078639	0.67147
Slc17a1	4	0.24242	2.0651	0.0027334	0.051651	0.03891	0.67147
Gbp10	4	0.24239	1.8781	0.0027355	0.051651	0.060363	0.67147
Gm21319	4	0.24217	2.0494	0.0027578	0.052023	0.04042	0.67147
Eif4ebp2	4	0.24193	2.0848	0.0027781	0.052294	0.037086	0.67147
Taf10	4	0.24187	1.2294	0.0027802	0.052294	0.21891	0.74658
Gm11562	4	0.24186	1.0656	0.0027802	0.052294	0.28662	0.78073
Leo1	4	0.24169	1.7217	0.0027995	0.052557	0.085131	0.67195
Smn1	4	0.24168	1.8175	0.0027995	0.052557	0.069133	0.67147
Olfr1188	4	0.24158	2.304	0.0028097	0.052698	0.021221	0.67147
Gm5634	4	0.24145	1.6753	0.0028168	0.052769	0.093879	0.6783
Pou2f1	4	0.24138	2.5464	0.0028188	0.052769	0.010883	0.67147
Nlrp4f	4	0.24116	1.7711	0.0028442	0.053194	0.076548	0.67147
1700029P11Rik	4	0.24088	2.1333	0.0028696	0.053605	0.032898	0.67147
Oxa1l	4	0.24087	1.8121	0.0028717	0.053605	0.069973	0.67147
Trim30a	4	0.2408	2.373	0.0028808	0.053725	0.017643	0.67147
BC052040	4	0.24073	1.9139	0.0028849	0.05375	0.05563	0.67147
Krr1	4	0.2405	1.1317	0.0029052	0.054078	0.25775	0.76415
Sept7	4	0.24045	1.3543	0.0029133	0.054178	0.17563	0.72093
Ptgr1	3	0.28355	2.1499	0.0029205	0.054208	0.031563	0.67147
Csnk1g3	4	0.24042	1.8784	0.0029194	0.054208	0.060321	0.67147
Prkcdbp	4	0.24037	2.1832	0.0029286	0.054307	0.029021	0.67147
Cdc73	4	0.24035	1.2008	0.0029316	0.054313	0.22982	0.74954
Hist1h2ak	4	0.24029	1.6745	0.0029428	0.054468	0.094035	0.6783
Tlcd2	4	0.24025	1.9209	0.0029459	0.054474	0.05474	0.67147
Myo9b	4	0.24012	2.6778	0.002951	0.054503	0.0074105	0.67147
Gins1	4	0.24009	1.2754	0.002953	0.054503	0.20216	0.73581
Ceacam19	4	0.24002	2.0304	0.0029581	0.054545	0.042316	0.67147
Kng2	4	0.23992	1.8924	0.0029632	0.054588	0.058441	0.67147
Gm10142	4	0.23987	1.8265	0.0029672	0.054612	0.067773	0.67147
Slc2a1	4	0.23978	1.4359	0.0029774	0.054748	0.15102	0.7052
Vmn1r200	4	0.23973	1.5613	0.0029814	0.054771	0.11846	0.68961
Vmn1r217	4	0.23968	1.5286	0.0029865	0.054813	0.12637	0.6929
Csnk1g2	4	0.23954	2.0836	0.0030058	0.055065	0.037192	0.67147
Lin52	4	0.23954	2.0253	0.0030058	0.055065	0.042833	0.67147
Itgb6	4	0.23945	1.7287	0.003016	0.0552	0.083861	0.67147
Ddx20	4	0.23914	1.922	0.0030475	0.055725	0.054603	0.67147
Rpl14	4	0.23911	0.8533	0.0030536	0.055785	0.39349	0.83036
Nfyc	4	0.23895	1.4995	0.0030729	0.056085	0.13374	0.70112
Fabp9	4	-0.24428	-3.0723	0.0030811	0.05613	0.0021242	0.64756
Wdr45	4	0.23886	2.4211	0.0030811	0.05613	0.015472	0.67147
Ropn1	4	-0.24424	-3.4443	0.0030872	0.056155	0.00057257	0.41409
Yipf7	4	-0.24422	-2.5634	0.0030882	0.056155	0.010366	0.67147
Cdc20	4	0.23863	0.87689	0.0031136	0.056565	0.38055	0.823
Ect2	4	0.23858	1.4638	0.0031187	0.056605	0.14326	0.7046
Bmpr2	4	0.23846	2.1323	0.0031309	0.056722	0.032982	0.67147
Kif18a	4	0.23846	2.0018	0.0031309	0.056722	0.045301	0.67147
Cops8	4	0.23825	1.9749	0.0031593	0.057185	0.048277	0.67147
Trit1	4	0.23817	1.7232	0.0031715	0.057353	0.084848	0.67147
Pld6	4	-0.24329	-2.4192	0.0031817	0.05747	0.015553	0.67147
Scaf1	4	-0.24326	-2.9161	0.0031868	0.05747	0.003544	0.67147
Fars2	4	0.23799	2.7318	0.0031868	0.05747	0.0062988	0.67147
Fam168a	4	0.23793	1.8176	0.0031898	0.057473	0.069122	0.67147
Slmap	4	-0.24311	-2.2159	0.003202	0.057587	0.026697	0.67147
Ammecr1	4	0.23782	2.4707	0.003202	0.057587	0.013486	0.67147
Brix1	4	-0.24304	-1.4443	0.0032112	0.057699	0.14865	0.7052
Hars	4	0.23771	1.3855	0.0032193	0.057758	0.16591	0.71427
Il18rap	4	0.23769	2.102	0.0032203	0.057758	0.03555	0.67147
Agpat6	4	0.23763	2.1566	0.0032264	0.057814	0.03104	0.67147
Speer4e	4	0.2376	1.4668	0.0032295	0.057816	0.14242	0.70424
Ndufab1	4	0.23755	1.5283	0.0032325	0.057818	0.12643	0.6929
Vmn1r229	4	-0.24251	-2.9444	0.003259	0.058238	0.0032356	0.67147
Lrig1	4	0.23728	2.1813	0.003263	0.058258	0.02916	0.67147
Ccl21b	4	0.23723	1.7893	0.0032722	0.058368	0.073563	0.67147
Vmn1r158	4	0.237	0.92422	0.0032935	0.058662	0.35537	0.81225
Arglu1	4	0.23698	1.7345	0.0032976	0.058662	0.082836	0.67147
Hk2	4	0.23696	1.2591	0.0032976	0.058662	0.20801	0.73903
Bod1l	4	-0.24194	-2.6517	0.0033149	0.058916	0.0080087	0.67147
Tcp10b	4	0.23666	1.8476	0.0033352	0.059224	0.06466	0.67147
Smc6	4	0.23658	2.1904	0.0033454	0.059315	0.028498	0.67147
Hist1h1c	4	0.23657	2.3465	0.0033464	0.059315	0.01895	0.67147
Strn4	4	-0.24159	-1.6069	0.0033596	0.059461	0.10807	0.68482
Glyatl3	4	-0.24155	-2.6746	0.0033637	0.059461	0.0074809	0.67147
Gm20604	4	0.2364	1.8598	0.0033616	0.059461	0.062915	0.67147
Krtap4-6	4	0.23634	1.5612	0.0033677	0.059479	0.11849	0.68961
Pmvk	4	-0.24137	-2.9918	0.0033911	0.059839	0.0027738	0.67147
Cfl2	4	0.23611	1.67	0.0033982	0.05991	0.094915	0.67907
Vwa9	4	0.2359	1.8134	0.0034236	0.060304	0.069763	0.67147
Hspa1b	4	0.23579	1.9856	0.0034338	0.060429	0.047083	0.67147
A430089I19Rik	4	0.23574	1.7748	0.0034379	0.060447	0.075938	0.67147
Polr1e	4	0.23566	1.8663	0.0034429	0.060482	0.062001	0.67147
Fkbp4	4	-0.24076	-1.8768	0.0034643	0.060749	0.060541	0.67147
Katnal1	4	0.23546	2.2198	0.0034633	0.060749	0.026435	0.67147
Pdpk1	4	-0.24061	-1.5565	0.0034836	0.061033	0.11958	0.68961
Vcan	4	-0.24058	-1.8691	0.0034887	0.061068	0.061606	0.67147
Nrip2	4	0.23512	1.89	0.0034978	0.061136	0.058762	0.67147
Amhr2	4	0.23511	2.3734	0.0034999	0.061136	0.017627	0.67147
Slc2a4	4	0.23507	1.8725	0.0035019	0.061136	0.061139	0.67147
Ear2	4	0.23501	1.9003	0.003508	0.061188	0.057394	0.67147
Tsg101	4	0.2349	1.7373	0.0035202	0.061327	0.082335	0.67147
Olfr1222	4	0.23487	2.46	0.0035222	0.061327	0.013893	0.67147
Ccnk	4	0.2348	2.2317	0.0035294	0.061397	0.025636	0.67147
Rps8	4	-0.24022	-0.86508	0.0035385	0.06141	0.387	0.82681
Wdr7	4	0.23471	1.8631	0.0035395	0.06141	0.062448	0.67147
Gpbp1	4	0.23469	1.987	0.0035405	0.06141	0.046919	0.67147
Gm15140	4	0.23468	2.3734	0.0035426	0.06141	0.017627	0.67147
Psmc5	4	0.2346	1.362	0.0035497	0.061479	0.17319	0.71894
Tmc8	4	0.23443	1.8488	0.0035741	0.061847	0.064481	0.67147
Traf6	4	0.2343	2.223	0.0035964	0.062179	0.026215	0.67147
Prss58	4	0.23416	1.8334	0.0036137	0.062386	0.066738	0.67147
Rbm33	4	0.23414	1.8656	0.0036147	0.062386	0.062095	0.67147
Lep	4	0.23404	1.9447	0.0036361	0.062699	0.051807	0.67147
Agap2	4	-0.23947	-2.4518	0.0036524	0.062925	0.014216	0.67147
Ndrg2	4	0.23383	1.7739	0.0036676	0.063132	0.076081	0.67147
Tigd3	4	0.23375	1.8719	0.0036788	0.063231	0.061221	0.67147
Aurka	4	0.23373	1.5486	0.0036798	0.063231	0.12147	0.68961
Timm8a1	4	0.23364	2.274	0.0036971	0.063473	0.022963	0.67147
Prpf40b	4	0.23359	2.5227	0.0037022	0.063505	0.011647	0.67147
Aqr	4	-0.23895	-2.2904	0.0037184	0.063617	0.021997	0.67147
Eya3	4	0.23348	2.0236	0.0037123	0.063617	0.043013	0.67147
Mrpl28	4	0.23344	2.0351	0.0037184	0.063617	0.041844	0.67147
Olfr312	4	-0.23887	-3.6447	0.0037347	0.063785	0.00026769	0.32917
Hoxa10	4	0.23331	1.955	0.0037327	0.063785	0.050577	0.67147
Sva	4	0.23311	2.0047	0.0037581	0.064128	0.044993	0.67147
Dkc1	3	0.2743	1.5617	0.0037723	0.064204	0.11836	0.68961
Rhox3c	4	0.23296	1.6907	0.0037703	0.064204	0.090893	0.67745
Lsm5	4	0.23295	1.557	0.0037713	0.064204	0.11947	0.68961
Pa2g4	4	0.23285	1.9432	0.0037896	0.064443	0.051988	0.67147
Osgep	4	0.23281	1.9692	0.0037967	0.064508	0.04893	0.67147
Rtf1	4	0.2327	1.3151	0.0038119	0.064655	0.18849	0.72606
Zscan4b	4	0.23269	1.5882	0.0038119	0.064655	0.11225	0.68874
Vkorc1l1	4	-0.23832	-2.295	0.0038221	0.064772	0.021735	0.67147
Dek	4	0.23255	1.9964	0.0038394	0.06497	0.045888	0.67147
Rpp21	4	0.23253	1.9503	0.0038404	0.06497	0.051141	0.67147
Tdo2	4	-0.23811	-2.2696	0.0038587	0.065223	0.02323	0.67147
Lrch4	4	-0.23789	-2.5623	0.0038882	0.065621	0.010397	0.67147
Hsdl2	4	0.23223	2.2341	0.0038912	0.065621	0.02548	0.67147
Rmi1	4	0.23221	2.3788	0.0038922	0.065621	0.017367	0.67147
AK010878	4	0.23205	1.8271	0.0039065	0.065805	0.067686	0.67147
Lrpprc	4	-0.23759	-2.761	0.003939	0.066296	0.0057622	0.67147
Tmem255a	4	0.23175	1.8534	0.0039451	0.066342	0.063825	0.67147
Liph	4	0.23173	1.7393	0.0039492	0.066354	0.081991	0.67147
Egr4	4	0.23161	2.2698	0.0039604	0.066445	0.02322	0.67147
Ppil3	4	0.23161	1.9354	0.0039614	0.066445	0.052946	0.67147
Sugp1	4	0.23144	1.651	0.0039746	0.066531	0.098735	0.67975
Slc38a10	4	0.23144	1.9896	0.0039746	0.066531	0.046636	0.67147
Alg9	4	0.23143	2.0798	0.0039766	0.066531	0.037541	0.67147
Cfap70	4	-0.23713	-2.2654	0.0039929	0.066689	0.023488	0.67147
Ifna12	4	0.23127	1.405	0.0039919	0.066689	0.16001	0.70913
Col4a2	4	0.23113	1.8581	0.0040041	0.066819	0.063154	0.67147
Pwp2	4	0.23102	1.7868	0.0040203	0.066937	0.073967	0.67147
Dmxl1	4	0.23102	1.749	0.0040203	0.066937	0.080287	0.67147
Olfr1366	4	0.231	2.1281	0.0040213	0.066937	0.033328	0.67147
B3gat1	4	-0.2367	-3.2173	0.0040529	0.067405	0.0012941	0.54157
Zbtb9	4	0.23071	1.8545	0.0040712	0.067525	0.063663	0.67147
Oas3	4	0.23067	1.5482	0.0040752	0.067525	0.12158	0.68961
Thoc3	4	0.23065	1.8826	0.0040752	0.067525	0.059757	0.67147
Rhox2d	4	0.23065	1.5153	0.0040773	0.067525	0.1297	0.69683
Lysmd4	4	0.23064	1.9134	0.0040773	0.067525	0.055693	0.67147
Bcl6	3	0.27133	1.9183	0.0041027	0.067832	0.055078	0.67147
Cebpb	4	-0.23641	-2.0485	0.0040996	0.067832	0.040509	0.67147
Clcn1	4	0.23048	2.6578	0.0041098	0.067893	0.0078663	0.67147
Smad5	4	0.23029	2.1744	0.0041301	0.068171	0.029674	0.67147
Timm17a	4	0.23016	2.1041	0.0041474	0.068358	0.035373	0.67147
Itga1	4	0.23014	1.9546	0.0041484	0.068358	0.050634	0.67147
Dync1h1	4	0.23008	1.4091	0.0041576	0.068452	0.1588	0.70872
Ankrd49	4	0.23003	2.7366	0.0041667	0.068545	0.0062082	0.67147
4930505A04Rik	4	0.22987	2.007	0.0041911	0.068889	0.044748	0.67147
Gpatch8	4	0.22979	1.9238	0.0042033	0.069032	0.054381	0.67147
Park2	4	0.22962	2.9355	0.0042287	0.069391	0.0033304	0.67147
Fam185a	4	0.22952	1.7169	0.004245	0.0696	0.086005	0.67389
Gm8298	3	0.26982	1.62	0.0042704	0.069958	0.10524	0.68346
Srsf10	4	0.22938	1.6721	0.0042755	0.069983	0.094497	0.6783
Olfr787	4	0.22927	1.6087	0.0042917	0.070191	0.10768	0.68409
Elac2	4	0.22916	1.8261	0.0043111	0.070423	0.067836	0.67147
Nr2c1	4	0.22914	2.111	0.0043131	0.070423	0.034768	0.67147
Arsb	4	0.22897	2.111	0.0043426	0.070846	0.034774	0.67147
Atl3	4	0.22881	1.2349	0.0043639	0.071093	0.21688	0.74593
Puf60	4	0.2288	0.99918	0.0043649	0.071093	0.31771	0.7948
Ninl	4	0.22866	1.7876	0.0043771	0.071174	0.073836	0.67147
Ric8b	4	0.22866	2.0354	0.0043771	0.071174	0.041813	0.67147
Eif1a	4	0.22862	1.6216	0.0043812	0.071181	0.10489	0.68346
Ptov1	4	0.2286	2.0486	0.0043863	0.071205	0.040499	0.67147
Gtpbp8	4	0.22856	2.2521	0.0043903	0.071212	0.024317	0.67147
Bloc1s1	4	0.22849	2.333	0.0044005	0.071318	0.01965	0.67147
Rrp9	4	0.22834	1.4885	0.0044198	0.071513	0.13663	0.70189
Ssxb5	4	0.22834	2.3633	0.0044198	0.071513	0.018115	0.67147
Trp53bp1	4	0.2281	2.0781	0.0044503	0.071947	0.037703	0.67147
Wee1	4	0.22801	1.024	0.0044554	0.07197	0.30584	0.7902
Recql4	4	0.22799	1.5171	0.0044595	0.071977	0.12923	0.69605
Mis18bp1	4	0.22784	1.8289	0.0044828	0.072295	0.067412	0.67147
C87499	4	0.22759	2.0249	0.0045184	0.072809	0.042881	0.67147
Papss1	4	0.22751	1.9782	0.0045316	0.072962	0.047909	0.67147
Elk4	4	0.22745	2.1378	0.0045459	0.073132	0.032533	0.67147
2310057M21Rik	4	-0.23366	-2.4538	0.0045723	0.073497	0.014135	0.67147
Sgms1	4	-0.23344	-3.0673	0.0045947	0.073796	0.0021598	0.64756
Foxe3	4	0.22709	1.6025	0.0046038	0.07386	0.10904	0.68522
Krtap4-8	4	0.22703	1.6772	0.0046079	0.07386	0.093509	0.6783
Ecd	4	0.22699	1.7308	0.0046099	0.07386	0.083494	0.67147
A530032D15Rik	4	0.22696	1.4092	0.004615	0.073881	0.15877	0.70872
Btk	4	-0.23323	-2.5048	0.0046262	0.073929	0.012253	0.67147
Rps18	4	0.22692	0.79882	0.0046241	0.073929	0.42439	0.84552
Ncbp1	4	0.2269	1.4108	0.0046292	0.073929	0.15831	0.70872
Dennd5a	4	-0.23305	-2.9248	0.0046475	0.0741	0.0034473	0.67147
Siva1	4	0.22682	1.6609	0.0046445	0.0741	0.096742	0.67975
Arl5a	4	-0.23273	-2.9984	0.0046922	0.074272	0.0027141	0.67147
Usp30	4	-0.23273	-2.7081	0.0046922	0.074272	0.006766	0.67147
Gm3404	4	0.22666	2.0179	0.0046628	0.074272	0.043604	0.67147
Ddx5	4	0.22658	1.7931	0.004674	0.074272	0.072956	0.67147
Tmem5	4	0.22653	1.4701	0.004677	0.074272	0.14152	0.70424
Pisd	4	0.22652	1.621	0.004679	0.074272	0.10502	0.68346
Ifna5	4	0.22648	1.9711	0.0046811	0.074272	0.048713	0.67147
Kif4	4	0.22644	1.7777	0.0046861	0.074272	0.075448	0.67147
Lhfpl2	4	0.22639	1.5933	0.0046892	0.074272	0.11109	0.68758
Naa20	4	0.2263	1.8707	0.0047166	0.07457	0.06138	0.67147
Stau1	4	0.22626	1.8778	0.0047187	0.07457	0.060414	0.67147
Tmem14c	4	0.22617	1.9733	0.0047299	0.074663	0.048465	0.67147
Pik3cg	4	0.22611	2.774	0.004736	0.074663	0.0055377	0.67147
Nudt11	4	0.22611	1.506	0.0047349	0.074663	0.13207	0.70094
Cmip	4	0.22607	2.3406	0.004741	0.074684	0.01925	0.67147
Fig4	4	0.22601	1.8725	0.0047522	0.07476	0.061133	0.67147
1700057G04Rik	4	0.22598	2.4592	0.0047573	0.07476	0.013924	0.67147
Mtmr10	4	0.22598	1.9718	0.0047573	0.07476	0.048633	0.67147
Birc6	4	0.22587	1.7936	0.0047675	0.07486	0.072878	0.67147
Dhps	4	0.22576	2.564	0.0047807	0.075008	0.010347	0.67147
Cxcl1	4	0.22572	1.7421	0.0047898	0.07502	0.081489	0.67147
Vmn1r79	4	0.22569	1.4868	0.0047929	0.07502	0.13707	0.70189
H2-Q1	4	0.22568	1.8601	0.0047929	0.07502	0.062871	0.67147
Ppp6r3	4	0.22565	1.5599	0.004797	0.075024	0.11877	0.68961
Chchd5	4	0.2256	2.0744	0.0048091	0.075127	0.038045	0.67147
Lsm6	4	0.22558	1.3737	0.0048112	0.075127	0.16953	0.71564
Lamp1	4	0.2255	2.172	0.0048244	0.075261	0.029856	0.67147
Tekt4	4	0.22546	1.6739	0.0048274	0.075261	0.09415	0.6783
Pmp2	4	-0.23192	-2.3566	0.0048356	0.075269	0.018444	0.67147
Fam163b	4	0.22541	1.8944	0.0048346	0.075269	0.058166	0.67147
Ccny	4	0.2253	1.7424	0.0048529	0.075478	0.081447	0.67147
Abcc6	4	0.22519	1.7758	0.004863	0.075577	0.075765	0.67147
Prkag2	4	-0.2317	-2.1992	0.0048691	0.075612	0.027865	0.67147
Atp5g1	4	0.22505	1.0839	0.0048813	0.075741	0.27839	0.77496
Tex43	4	0.22502	1.8831	0.0048874	0.075776	0.059685	0.67147
Tdpoz3	4	0.22496	1.9607	0.0048986	0.07589	0.049911	0.67147
Clk3	4	0.22476	1.9833	0.0049321	0.076292	0.047339	0.67147
Npm1	4	0.22473	1.4345	0.0049362	0.076292	0.15144	0.7052
Gm3415	4	0.22472	1.9404	0.0049362	0.076292	0.05233	0.67147
Acat3	4	-0.23125	-2.0628	0.0049423	0.076327	0.03913	0.67147
Grik3	4	0.22463	1.8085	0.0049515	0.076379	0.070529	0.67147
Olfr446	4	0.22461	1.9285	0.0049535	0.076379	0.053799	0.67147
Tnr	4	-0.23116	-3.0967	0.0049596	0.076413	0.0019568	0.64471
Ssr2	4	-0.23105	-2.5125	0.0049799	0.076667	0.011989	0.67147
Furin	4	-0.23099	-1.7118	0.0049921	0.076794	0.08693	0.67443
Vmn1r9	4	0.22429	2.0918	0.0050125	0.077047	0.036461	0.67147
Camkv	4	-0.23075	-2.8165	0.0050368	0.077361	0.0048557	0.67147
Rhox7a	4	0.22403	2.053	0.005049	0.077488	0.040075	0.67147
Nudt9	4	0.22398	2.2234	0.0050582	0.077568	0.026187	0.67147
9830147E19Rik	4	0.22393	2.1723	0.0050694	0.077679	0.029834	0.67147
Ralgps1	4	0.22378	2.1896	0.0050938	0.077992	0.028554	0.67147
Olfr1385	4	0.22371	1.8736	0.0051029	0.078012	0.060981	0.67147
Pdrg1	4	0.22369	1.8602	0.005107	0.078012	0.062861	0.67147
Gm10334	4	0.22369	1.7703	0.005107	0.078012	0.076676	0.67147
Rbmx2	4	0.22367	1.5491	0.0051121	0.078029	0.12137	0.68961
2200002J24Rik	4	0.22361	2.1643	0.0051222	0.078124	0.030438	0.67147
Defb45	4	0.22359	2.6526	0.0051273	0.078141	0.0079873	0.67147
Mocs3	4	0.22341	1.8264	0.0051568	0.078529	0.067796	0.67147
Pald1	4	0.22325	2.085	0.0051832	0.078871	0.037074	0.67147
Bola1	4	0.22319	2.1368	0.0051995	0.078996	0.032611	0.67147
Kcnk16	4	0.22319	1.7471	0.0051995	0.078996	0.080616	0.67147
Cpsf1	4	0.22316	1.6739	0.0052056	0.079028	0.094146	0.6783
Bloc1s4	4	0.22312	2.2288	0.0052137	0.07909	0.025828	0.67147
Rrm2b	3	0.26201	1.7684	0.0052757	0.079846	0.077002	0.67147
Veph1	4	-0.22942	-2.9108	0.0052737	0.079846	0.0036053	0.67147
Gm7073	4	-0.22939	-3.1469	0.0052798	0.079846	0.0016503	0.59036
Scgb1b29	4	0.22283	1.7277	0.0052737	0.079846	0.084038	0.67147
Olfr1471	4	0.22265	1.9958	0.0052991	0.080077	0.045959	0.67147
Vmn2r46	4	-0.2292	-2.9027	0.0053144	0.080246	0.0036996	0.67147
Gm4302	4	0.22238	1.4434	0.0053367	0.08046	0.14891	0.7052
Ttyh2	4	0.22237	1.6893	0.0053367	0.08046	0.09117	0.67745
Apol7b	4	0.22223	1.6006	0.0053601	0.080689	0.10947	0.68526
Gm5662	4	0.22223	1.4691	0.0053581	0.080689	0.1418	0.70424
Uba52	4	0.22216	1.0144	0.0053713	0.080795	0.3104	0.7918
Trappc5	4	0.22194	2.2493	0.0054109	0.081329	0.024493	0.67147
Ptcra	4	-0.22832	-3.3842	0.0054811	0.082192	0.0007139	0.41409
Taf6l	4	0.22156	1.9739	0.005478	0.082192	0.048399	0.67147
Gabpa	4	0.22155	2.4514	0.0054811	0.082192	0.01423	0.67147
Ddi2	4	0.2215	2.5393	0.0054882	0.082192	0.011108	0.67147
Krt34	4	0.22148	2.038	0.0054892	0.082192	0.041546	0.67147
Prl8a2	4	-0.22788	-2.117	0.0055624	0.083207	0.034262	0.67147
Pdcd4	4	0.22101	1.8493	0.0055654	0.083207	0.06441	0.67147
Mia	4	0.22094	2.1433	0.0055736	0.083265	0.032087	0.67147
Gltpd2	4	-0.22773	-2.2305	0.0055878	0.083414	0.025713	0.67147
Ddx19b	4	0.22075	1.6658	0.0056	0.083533	0.095751	0.67975
Pdik1l	4	-0.22736	-1.8004	0.0056488	0.084197	0.071795	0.67147
Gprc5b	4	0.22051	2.0107	0.0056559	0.084239	0.044361	0.67147
Prss41	4	-0.22723	-3.3442	0.0056712	0.084381	0.0008252	0.42726
Olfr774	4	0.22038	1.8035	0.0056783	0.084381	0.071309	0.67147
Rft1	4	0.22038	1.6933	0.0056783	0.084381	0.090403	0.67684
Smo	4	0.22024	1.5194	0.0057098	0.084785	0.12866	0.69563
Szrd1	4	-0.22681	-1.6203	0.0057586	0.085445	0.10518	0.68346
Il7r	4	0.21988	1.6553	0.0057728	0.085592	0.097865	0.67975
Bnip3	4	0.21964	1.6168	0.0058084	0.086054	0.10592	0.68346
Prl8a8	4	0.21945	2.0931	0.0058338	0.086366	0.036344	0.67147
Tgs1	4	0.21938	1.5223	0.0058531	0.086586	0.12792	0.6947
Rps9	4	-0.22636	-1.3295	0.0058623	0.086657	0.1837	0.72459
Rassf2	4	-0.22618	-2.9473	0.0058958	0.086951	0.003206	0.67147
Pbrm1	4	0.21917	1.9922	0.0058968	0.086951	0.046353	0.67147
F830045P16Rik	4	0.21916	2.2255	0.0058968	0.086951	0.026049	0.67147
Rad1	4	0.21915	1.9571	0.0058999	0.086951	0.050334	0.67147
Src	4	-0.22614	-2.1728	0.005905	0.086961	0.029797	0.67147
Cep170b	4	0.21897	0.90091	0.0059365	0.08736	0.36764	0.81852
Gcn1l1	4	0.21884	2.2056	0.0059659	0.087728	0.027412	0.67147
Zc3h8	4	0.21872	2.336	0.0059863	0.087961	0.019491	0.67147
Kcnh7	4	0.21865	1.7861	0.0060025	0.088084	0.074085	0.67147
Srcap	4	0.21864	1.4119	0.0060036	0.088084	0.15799	0.70872
Zfp146	4	-0.22548	-2.5033	0.0060442	0.08841	0.012303	0.67147
Nmu	4	0.21849	2.1827	0.0060381	0.08841	0.029055	0.67147
Olfr297	4	0.21846	1.7351	0.0060473	0.08841	0.08273	0.67147
Kctd18	4	0.21845	1.7414	0.0060473	0.08841	0.081608	0.67147
Atp6v1d	4	0.21844	1.8897	0.0060483	0.08841	0.0588	0.67147
Pold2	4	0.21841	1.1098	0.0060534	0.088412	0.26708	0.77045
Nelfa	4	0.2184	1.6447	0.0060574	0.088412	0.10004	0.68013
Grhl2	4	0.21831	1.8583	0.0060686	0.08851	0.063127	0.67147
Nucb2	4	0.21823	1.6685	0.0060737	0.088519	0.095221	0.67975
Mtmr2	4	0.2182	2.0982	0.0060839	0.088601	0.035888	0.67147
Adsl	4	0.21813	1.61	0.0060981	0.088743	0.1074	0.68365
Sox9	4	0.21803	1.7697	0.0061194	0.088981	0.076775	0.67147
Slc30a6	4	0.218	1.5604	0.0061235	0.088981	0.11866	0.68961
Ppan	4	0.21785	1.0697	0.006151	0.089314	0.28476	0.78044
Vmn1r31	4	0.21777	1.1872	0.0061713	0.089543	0.23515	0.75211
Ccnyl1	4	0.21769	1.9949	0.0061967	0.089845	0.04605	0.67147
Coq6	4	0.21753	2.2453	0.0062272	0.090221	0.024751	0.67147
Sp3	4	-0.22467	-2.4182	0.0062323	0.090228	0.015599	0.67147
1700010I14Rik	4	0.21748	2.0239	0.0062374	0.090235	0.042978	0.67147
Pqbp1	4	0.21745	2.2608	0.0062424	0.090242	0.02377	0.67147
Tmem128	4	0.21739	2.199	0.0062496	0.090279	0.027876	0.67147
Upp2	4	-0.22447	-2.1104	0.0062729	0.090484	0.034827	0.67147
Cd3eap	4	0.2173	1.5097	0.0062689	0.090484	0.13112	0.69821
Dlx4	4	0.21723	1.8049	0.0062851	0.090593	0.071086	0.67147
Cdk5r2	4	0.21721	1.9401	0.0062963	0.090688	0.052369	0.67147
Ivd	4	-0.22433	-2.043	0.0063085	0.090797	0.041056	0.67147
Banf1	4	0.21707	1.7559	0.0063146	0.090819	0.079106	0.67147
Gls	4	0.21704	1.6363	0.0063197	0.090825	0.10177	0.68249
Sp2	4	0.21698	2.756	0.0063268	0.090861	0.0058509	0.67147
Gm14458	4	0.21696	1.8642	0.0063349	0.090912	0.062292	0.67147
Hist3h2ba	4	0.21689	1.5721	0.0063543	0.091122	0.11593	0.68874
Cys1	4	0.21686	2.0482	0.0063614	0.09115	0.040536	0.67147
Asxl1	4	0.21683	2.0306	0.0063654	0.09115	0.042292	0.67147
Mboat7	4	0.21672	2.391	0.0063858	0.091375	0.016804	0.67147
Creb3l1	4	0.21666	1.9821	0.006397	0.091468	0.047467	0.67147
Scn9a	4	0.21648	2.1614	0.0064407	0.092026	0.030664	0.67147
Fam76a	4	-0.22362	-2.4209	0.006464	0.092032	0.015482	0.67147
Vmn1r148	4	0.2164	1.8035	0.0064549	0.092032	0.071308	0.67147
Ckap5	4	0.21635	1.238	0.006461	0.092032	0.21571	0.74498
C2cd4c	4	0.21632	1.7238	0.0064671	0.092032	0.084745	0.67147
Olfr1449	4	0.21631	1.7817	0.0064681	0.092032	0.074795	0.67147
Psenen	4	0.2163	1.8099	0.0064691	0.092032	0.070312	0.67147
Slitrk1	4	-0.2235	-2.6253	0.0064915	0.092217	0.0086576	0.67147
Myo10	4	0.21619	1.9665	0.0064895	0.092217	0.04924	0.67147
Sdk1	4	0.2161	2.453	0.0065006	0.09228	0.014168	0.67147
Gm5941	4	0.21601	1.7347	0.006524	0.092545	0.082789	0.67147
Chst1	4	0.21592	1.7112	0.0065382	0.09268	0.087038	0.67443
Vps54	4	0.21559	1.6722	0.0065992	0.093343	0.094484	0.6783
Btg1-ps1	4	0.21559	2.206	0.0065992	0.093343	0.027385	0.67147
Ccl19	4	0.21558	2.1152	0.0065992	0.093343	0.034414	0.67147
Ext1	4	0.21545	1.7821	0.0066328	0.09375	0.074738	0.67147
Coch	4	0.21525	1.5771	0.0066673	0.094171	0.11477	0.68874
Onecut2	4	0.21522	2.113	0.0066755	0.094218	0.034604	0.67147
Arnt	4	0.21513	1.6886	0.0066846	0.09428	0.091301	0.67761
Kdr	4	0.2151	1.8133	0.0066938	0.094341	0.069784	0.67147
Rnf24	4	0.21506	1.6263	0.0067029	0.094402	0.10388	0.68346
Nufip2	4	-0.22219	-2.3383	0.0067588	0.094783	0.019373	0.67147
Aco2	4	-0.22208	-2.4343	0.0067781	0.094783	0.01492	0.67147
Aamp	4	0.21486	1.4015	0.0067466	0.094783	0.16105	0.70989
Sec1	4	0.21483	1.7753	0.0067568	0.094783	0.075849	0.67147
Mrpl52	4	0.21483	2.1247	0.0067578	0.094783	0.033615	0.67147
Slc4a9	4	0.21483	2.3607	0.0067558	0.094783	0.018239	0.67147
Rpl39	4	0.21478	1.3285	0.006769	0.094783	0.18401	0.72537
Ctdnep1	4	0.21476	2.0841	0.0067741	0.094783	0.037154	0.67147
Olfr472	4	0.21476	2.2686	0.0067741	0.094783	0.023296	0.67147
Foxf1	4	0.21473	1.7335	0.0067761	0.094783	0.083009	0.67147
Cenpe	4	0.21469	1.2865	0.0067873	0.094791	0.19827	0.73335
Jmjd6	4	0.21467	1.6405	0.0067883	0.094791	0.1009	0.682
Teddm3	4	0.21455	1.5759	0.0068198	0.095163	0.11505	0.68874
Prss52	4	0.2145	2.1672	0.006831	0.095252	0.030219	0.67147
Gm4788	4	0.21445	1.6385	0.0068412	0.095326	0.10132	0.682
Rad50	4	0.21442	1.9791	0.0068534	0.095428	0.047803	0.67147
Olfr1076	4	-0.22151	-2.2835	0.0068869	0.095684	0.022403	0.67147
Ankrd50	4	-0.22148	-2.595	0.006893	0.095684	0.0094584	0.67147
Gm5935	4	0.21431	1.7312	0.0068808	0.095684	0.083418	0.67147
Lrp4	4	0.21425	1.5776	0.006893	0.095684	0.11465	0.68874
Fam129b	4	0.21422	1.7479	0.0068961	0.095684	0.080478	0.67147
Gemin4	4	0.21419	1.728	0.0069032	0.095715	0.083988	0.67147
Nus1	4	0.21402	1.3924	0.0069428	0.096197	0.1638	0.7123
Hunk	4	-0.22129	-2.8936	0.0069479	0.0962	0.0038085	0.67147
Rfpl4b	4	-0.22123	-2.3028	0.0069571	0.096259	0.021289	0.67147
Klhl17	4	0.21388	2.3268	0.0069743	0.09643	0.019978	0.67147
Pycr1	4	-0.22107	-2.0015	0.0070038	0.096634	0.04534	0.67147
Tubgcp6	4	0.21379	1.8013	0.0069977	0.096634	0.071648	0.67147
Bcl2l10	4	0.21378	1.7451	0.0070038	0.096634	0.080975	0.67147
Vcp	4	0.21347	0.82767	0.007076	0.097561	0.40786	0.83642
0610011F06Rik	4	-0.22072	-2.1718	0.0070872	0.097647	0.029869	0.67147
Aktip	4	-0.22055	-2.4353	0.0071177	0.097999	0.014881	0.67147
Mocos	4	-0.22055	-2.1433	0.0071227	0.098	0.032088	0.67147
Serpinb8	4	0.21323	1.654	0.007139	0.098155	0.09812	0.67975
Urb2	4	0.21316	1.4853	0.0071614	0.098394	0.13747	0.70189
Farsa	4	0.21311	1.8827	0.0071705	0.098451	0.059738	0.67147
Amd2	4	0.21297	1.7883	0.0072071	0.098872	0.073727	0.67147
Surf4	4	0.21295	1.8555	0.0072142	0.098872	0.063524	0.67147
Ppp4c	4	0.21295	1.7938	0.0072163	0.098872	0.072838	0.67147
Ipo11	4	0.21285	2.0471	0.0072447	0.099193	0.040646	0.67147
Spice1	4	0.21278	1.6293	0.0072559	0.099277	0.10325	0.68346
Itgb3bp	4	0.21271	1.0238	0.0072701	0.099402	0.30591	0.7902
Incenp	4	0.21265	1.6543	0.0072905	0.099404	0.098069	0.67975
Gm10377	4	0.21265	0.85046	0.0072895	0.099404	0.39507	0.83143
Bub1b	4	0.21264	1.6251	0.0072915	0.099404	0.10413	0.68346
Rhbdf2	4	0.21264	1.4932	0.0072905	0.099404	0.13538	0.70189
Poc5	4	0.21263	1.7079	0.0072956	0.099404	0.087655	0.67443
Zfp872	4	0.21254	2.0274	0.007321	0.099682	0.042624	0.67147
Ccser2	4	0.21236	1.9695	0.0073637	0.10019	0.048891	0.67147
Dusp12	4	0.2123	2.6972	0.0073809	0.10036	0.0069916	0.67147
Xk	4	0.21217	1.9551	0.0074053	0.10062	0.050572	0.67147
Prl2c2	4	0.21208	1.6832	0.0074267	0.10084	0.092333	0.6783
Rap1b	4	-0.21938	-1.5761	0.0074328	0.10086	0.11501	0.68874
Brca2	4	-0.21936	-2.3693	0.0074409	0.1009	0.017822	0.67147
Psme2	4	-0.21934	-2.5983	0.007448	0.10092	0.009369	0.67147
Tmem199	4	0.21189	1.4699	0.0074785	0.10122	0.14159	0.70424
Pin4	4	0.21187	1.7639	0.0074806	0.10122	0.07775	0.67147
Olfr1406	4	0.21183	1.913	0.0074887	0.10126	0.055745	0.67147
Pgam1	4	0.21169	0.93319	0.0075222	0.10159	0.35072	0.80954
Gtf3c6	4	0.21168	1.4673	0.0075233	0.10159	0.14229	0.70424
Cdc16	4	0.21156	0.73518	0.0075558	0.10196	0.46223	0.85846
Fzd10	4	0.21152	1.8652	0.007567	0.10204	0.062158	0.67147
Gsr	4	0.21144	1.7045	0.0075893	0.10227	0.088283	0.67496
Tacc3	4	0.21137	1.7231	0.0076046	0.10241	0.084867	0.67147
Avpr1a	4	0.21132	2.4073	0.0076158	0.10249	0.016071	0.67147
Wdr48	3	0.24815	1.7325	0.0076554	0.10295	0.083187	0.67147
Srf	4	-0.21849	-2.4912	0.0076605	0.10295	0.012733	0.67147
Setd2	4	0.21101	2.0977	0.0076767	0.1031	0.03593	0.67147
Gabra2	4	0.21092	2.0602	0.0077062	0.10342	0.039375	0.67147
Foxk1	4	0.21087	1.704	0.0077144	0.10346	0.088382	0.67496
Ncor2	4	-0.21815	-3.3937	0.0077377	0.10371	0.00068959	0.41409
Amelx	4	0.21071	1.5555	0.007753	0.10384	0.11983	0.68961
S100a10	4	0.21066	2.1267	0.0077693	0.10399	0.033449	0.67147
Krtap1-4	4	0.21052	1.689	0.0078008	0.10434	0.09121	0.67745
Hist1h4b	4	0.21044	1.31	0.0078262	0.10461	0.19019	0.72697
Ruvbl1	3	0.24732	1.0128	0.0078435	0.10469	0.31116	0.7925
Gm4070	4	0.21038	1.5402	0.0078424	0.10469	0.1235	0.69129
Oard1	4	-0.2177	-3.0204	0.0078607	0.10485	0.0025246	0.66229
Cxx1b	4	0.21027	1.8191	0.0078729	0.10495	0.068901	0.67147
Ccnj	4	0.21017	2.2205	0.0078963	0.10519	0.026386	0.67147
Gpr25	4	0.21009	2.3326	0.0079126	0.10533	0.019669	0.67147
Phospho2	4	0.21004	2.4408	0.0079278	0.10546	0.014653	0.67147
Mrgprx2	4	0.20996	2.0916	0.0079492	0.10568	0.036478	0.67147
Tfpi	4	0.20987	2.0293	0.0079736	0.10593	0.042432	0.67147
Pvr	4	0.2098	1.6581	0.0079919	0.1061	0.097301	0.67975
Vmn1r126	4	0.20974	0.82695	0.008001	0.10615	0.40826	0.83699
Lrch3	4	-0.21719	-3.2792	0.0080173	0.10629	0.0010408	0.49948
Vps41	4	0.20963	1.9544	0.0080366	0.1064	0.050658	0.67147
Sdhd	4	0.20962	1.7339	0.0080396	0.1064	0.082944	0.67147
Prepl	4	0.2096	1.5697	0.0080417	0.1064	0.11648	0.68912
Angptl3	4	0.20956	1.6994	0.0080478	0.10641	0.089238	0.67507
Vmn1r103	4	0.20952	1.6416	0.008063	0.10654	0.10067	0.682
Gm13871	4	0.20947	1.242	0.0080762	0.10664	0.21423	0.74456
Smad7	4	-0.21691	-2.4789	0.0080884	0.10673	0.013178	0.67147
Det1	4	0.20939	1.9849	0.0080966	0.10677	0.047159	0.67147
9330182O14Rik	4	0.20931	1.4737	0.0081128	0.10691	0.14055	0.70424
1700016D06Rik	4	0.20925	1.6525	0.008126	0.10701	0.098433	0.67975
Atpaf1	4	-0.21679	-2.6905	0.0081382	0.1071	0.0071339	0.67147
Sod1	4	0.20917	1.5326	0.0081504	0.10719	0.12538	0.6929
Olfr1383	4	0.20915	1.6494	0.0081555	0.10719	0.099062	0.67975
Polr1d	4	0.20909	2.166	0.0081769	0.10735	0.030309	0.67147
Hoxa7	4	0.20908	1.587	0.0081789	0.10735	0.11251	0.68874
Ecsit	4	0.20889	1.8777	0.0082226	0.10785	0.060428	0.67147
Rps12	4	0.2088	0.73334	0.008247	0.1081	0.46335	0.85846
4933402N03Rik	4	0.20857	2.0468	0.0083222	0.10901	0.040675	0.67147
Hps6	4	0.20851	2.3762	0.0083294	0.10904	0.01749	0.67147
Zmynd11	3	0.24508	2.3827	0.0083446	0.10916	0.017188	0.67147
Pten	4	0.20839	2.5579	0.0083741	0.10942	0.010531	0.67147
Exosc7	4	0.20837	1.057	0.0083761	0.10942	0.29051	0.78268
Nup133	4	0.20833	1.6884	0.0083842	0.10942	0.091343	0.67766
Phlpp2	4	0.20831	2.2777	0.0083863	0.10942	0.022742	0.67147
Cd101	4	0.20826	1.8486	0.0084046	0.10958	0.064519	0.67147
Dmap1	4	0.20816	1.5614	0.0084269	0.10974	0.11843	0.68961
Uhrf1	4	0.20815	1.3388	0.008428	0.10974	0.18062	0.72213
Rbbp5	4	0.20812	2.1594	0.0084371	0.10979	0.030819	0.67147
Pcbd1	4	0.2081	1.6796	0.0084483	0.10986	0.093039	0.6783
Tbc1d2b	4	0.20775	1.8502	0.0085388	0.11096	0.064289	0.67147
Fcrl1	4	0.2075	2.1497	0.0086018	0.11166	0.03158	0.67147
Cenpc1	4	0.20749	1.5602	0.0086038	0.11166	0.11872	0.68961
Gm4303	4	0.20743	1.0334	0.0086221	0.11183	0.3014	0.78843
Rab9	4	0.20739	1.7758	0.0086394	0.1119	0.075758	0.67147
Ghdc	4	0.20739	1.5743	0.0086394	0.1119	0.11542	0.68874
Nol11	4	0.20732	1.4234	0.0086607	0.11211	0.15462	0.70672
Ceacam10	4	0.20729	2.0154	0.0086729	0.11219	0.043861	0.67147
Olfr1252	4	0.2072	1.9126	0.0086943	0.11239	0.055801	0.67147
Utp20	4	-0.21454	-1.8632	0.0087665	0.11325	0.062434	0.67147
Rpl36	4	0.2067	0.76149	0.0088285	0.11398	0.44636	0.85123
Olfr287	4	0.20663	1.6826	0.0088396	0.11405	0.092448	0.6783
Thoc7	4	-0.21434	-1.6032	0.0088488	0.11409	0.10889	0.68522
Smap1	4	-0.21425	-3.2143	0.0088732	0.11433	0.0013075	0.54157
P3h1	4	0.20645	1.8179	0.0088956	0.11454	0.069073	0.67147
Tsr1	3	0.24254	1.281	0.0089718	0.11545	0.20021	0.73462
Taar2	4	0.20612	1.9539	0.0089952	0.11567	0.050718	0.67147
Ppm1d	4	0.206	1.2523	0.0090348	0.11611	0.21047	0.74118
Ikbkb	4	-0.21359	-1.8287	0.0090765	0.1165	0.067439	0.67147
Wbscr17	4	0.2059	1.7054	0.0090775	0.1165	0.088124	0.67496
Uqcrh	4	0.20585	1.5338	0.0090968	0.11668	0.12507	0.6929
Spata2	4	-0.21343	-2.2977	0.0091365	0.11703	0.021577	0.67147
Maged1	4	0.20573	2.2986	0.0091334	0.11703	0.021526	0.67147
Chgb	4	-0.21321	-2.6219	0.0091985	0.11775	0.0087447	0.67147
Xrcc1	4	0.20535	1.5404	0.0092564	0.11841	0.12347	0.69129
Gm5148	4	0.20532	1.09	0.0092645	0.11844	0.27573	0.77369
Apbb3	4	0.20529	1.4445	0.0092727	0.11847	0.14859	0.7052
4931423N10Rik	4	0.20511	1.7741	0.0093337	0.11909	0.076039	0.67147
Snrpb2	4	0.2051	1.8875	0.0093347	0.11909	0.059092	0.67147
Ilf2	4	0.20508	1.7128	0.0093398	0.11909	0.086746	0.67443
Uso1	4	0.20501	1.7051	0.0093601	0.11922	0.088171	0.67496
Copa	4	0.20498	0.72973	0.0093672	0.11922	0.46555	0.8587
Zfp641	4	0.20497	1.9705	0.0093682	0.11922	0.048783	0.67147
Prdm10	4	0.20496	1.4106	0.0093753	0.11924	0.15836	0.70872
Ssxb3	4	0.20492	1.5633	0.0093896	0.11934	0.11798	0.68961
Taf1d	4	0.2049	1.2834	0.0093987	0.11938	0.19937	0.73387
4933434E20Rik	4	-0.2125	-2.8189	0.009413	0.11941	0.0048192	0.67147
Nup43	4	0.20486	1.7577	0.0094109	0.11941	0.078806	0.67147
Bad	4	-0.21243	-1.4378	0.0094333	0.11959	0.1505	0.7052
Dpyd	4	0.20469	1.5482	0.0094719	0.12	0.12158	0.68961
Eef1b2	3	0.24036	1.6181	0.0095095	0.1204	0.10564	0.68346
Ranbp1	4	0.20441	1.2638	0.0095654	0.12103	0.20631	0.73791
4930427A07Rik	4	-0.21202	-2.4539	0.0095848	0.12105	0.01413	0.67147
Serpine3	4	-0.21202	-1.776	0.0095858	0.12105	0.075732	0.67147
Gcnt1	4	0.20439	1.5933	0.0095746	0.12105	0.11108	0.68758
Patl1	4	-0.21193	-2.8202	0.0096234	0.12129	0.0047998	0.67147
Eif3i	4	0.20424	1.3207	0.0096173	0.12129	0.18661	0.72563
Gm8693	4	0.20424	1.4863	0.0096173	0.12129	0.1372	0.70189
Oit3	4	-0.21186	-2.3485	0.0096427	0.12146	0.01885	0.67147
Mmp2	4	0.20415	1.7688	0.0096488	0.12146	0.076927	0.67147
Ube2g1	4	0.20408	2.4806	0.0096803	0.12178	0.013116	0.67147
Mrps26	4	0.20403	2.0588	0.0096986	0.12193	0.039512	0.67147
Cdk2ap1	4	0.20399	1.9667	0.0097067	0.12195	0.049222	0.67147
Cd82	4	0.20381	2.0557	0.0097626	0.1225	0.039816	0.67147
Rint1	4	0.20381	1.8734	0.0097626	0.1225	0.06101	0.67147
Slfn8	4	0.20367	1.8099	0.0097982	0.12274	0.070307	0.67147
Cds2	4	0.20366	1.4404	0.0097992	0.12274	0.14975	0.7052
Gpr155	4	0.20365	2.3066	0.0098003	0.12274	0.021074	0.67147
Trim33	4	0.20356	2.1008	0.0098277	0.123	0.035656	0.67147
Gabra5	4	0.20352	2.5066	0.0098399	0.12308	0.012189	0.67147
Sec22b	4	0.20344	1.7709	0.0098602	0.12319	0.076584	0.67147
Xkr5	4	0.20344	2.1227	0.0098612	0.12319	0.033781	0.67147
Haus8	4	0.20333	1.1652	0.0098958	0.12354	0.24395	0.75857
4930447A16Rik	4	-0.21104	-2.0827	0.0099039	0.12356	0.037276	0.67147
Srprb	4	-0.211	-2.0988	0.0099161	0.12364	0.035833	0.67147
Plekhf2	4	0.20325	2.1682	0.0099243	0.12366	0.030147	0.67147
Tuba4a	4	0.20313	2.1107	0.0099649	0.12409	0.034796	0.67147
Alpk2	4	0.20307	1.7188	0.0099883	0.1243	0.085653	0.6734
Xpo6	4	-0.21063	-2.2847	0.010038	0.12461	0.02233	0.67147
Btf3	4	0.20295	1.0446	0.010025	0.12461	0.29619	0.78546
Pramel3	4	0.20293	1.7138	0.01003	0.12461	0.086567	0.67443
Ago3	4	0.20292	1.9511	0.010035	0.12461	0.051047	0.67147
Gm2897	4	0.20287	0.77288	0.010057	0.12475	0.43959	0.84977
Rhoa	4	0.20286	1.0873	0.010063	0.12475	0.27691	0.77424
Defa2	1	0.51758	0.8585	0.010125	0.12512	0.39062	0.82926
Gm13278	1	0.50848	1.1209	0.010125	0.12512	0.26233	0.76782
Rnaseh2a	4	0.20274	1.1496	0.010103	0.12512	0.25029	0.7597
Nom1	4	0.2027	0.93452	0.010116	0.12512	0.35004	0.80882
Dpep2	4	0.20265	1.8757	0.010131	0.12512	0.0607	0.67147
Dhcr7	4	0.20264	2.0733	0.010131	0.12512	0.03814	0.67147
Bpifb2	4	0.20253	1.8688	0.010178	0.12563	0.061645	0.67147
Vps39	4	0.20248	0.87579	0.010198	0.12579	0.38115	0.82353
Bdp1	4	0.20244	1.4857	0.010208	0.12584	0.13735	0.70189
2700029M09Rik	4	-0.21	-2.4156	0.010223	0.12589	0.01571	0.67147
Fcgbp	4	0.20238	1.9272	0.010225	0.12589	0.053952	0.67147
Dcun1d5	4	-0.20991	-2.1059	0.010251	0.12605	0.035212	0.67147
Gm13152	4	0.20229	1.6701	0.010247	0.12605	0.094898	0.67907
Pyurf	4	0.20226	1.7051	0.010257	0.12605	0.08818	0.67496
Gm12794	4	-0.20981	-3.0634	0.010279	0.12624	0.0021884	0.64756
Ap2m1	4	-0.20976	-2.1937	0.010295	0.12628	0.028254	0.67147
Jakmip2	4	0.20216	1.735	0.010288	0.12628	0.082735	0.67147
Pemt	4	0.20203	2.3928	0.010331	0.12656	0.016721	0.67147
Zfp280c	4	0.20203	1.8621	0.01033	0.12656	0.062587	0.67147
Olfr487	4	-0.20954	-2.5413	0.010363	0.12688	0.011044	0.67147
Cope	4	0.20189	1.6235	0.01038	0.127	0.10447	0.68346
Sh2d2a	4	0.20183	2.0647	0.010399	0.12716	0.038952	0.67147
Jak1	4	-0.20941	-3.1089	0.010409	0.1272	0.001878	0.64471
Rad9a	4	0.20179	1.8657	0.010417	0.12723	0.062079	0.67147
Afg3l2	4	0.20175	1.9506	0.010425	0.12725	0.051108	0.67147
Apex2	4	0.20166	2.0155	0.010464	0.12762	0.043852	0.67147
Alg1	4	0.20164	1.424	0.010469	0.12762	0.15445	0.70672
Antxrl	4	0.20158	1.5263	0.01049	0.1278	0.12694	0.6929
Nme1	4	-0.20908	-2.0501	0.010526	0.12808	0.040353	0.67147
Tatdn2	4	-0.20906	-1.9362	0.010533	0.12808	0.052845	0.67147
Igf2bp3	4	-0.20905	-2.3273	0.010533	0.12808	0.019949	0.67147
Trim54	4	0.20144	2.303	0.010551	0.12823	0.021279	0.67147
Gm14459	4	0.2014	1.8652	0.010569	0.12836	0.062151	0.67147
Gm14501	4	0.20129	1.8744	0.010607	0.12875	0.060876	0.67147
Rassf8	4	0.20117	2.2712	0.010636	0.12901	0.023136	0.67147
Lyzl1	4	0.20109	1.2502	0.010663	0.12927	0.21122	0.74142
Olfr301	4	-0.20854	-1.8697	0.010728	0.12986	0.061529	0.67147
Eps8	4	0.20091	1.9639	0.010722	0.12986	0.049542	0.67147
Gnb1l	4	0.20088	1.6716	0.010732	0.12986	0.094605	0.67851
Gm6034	4	-0.20831	-2.7962	0.010812	0.13068	0.0051715	0.67147
Tceb1	4	0.20063	1.2742	0.010814	0.13068	0.20258	0.73581
Dtna	4	0.20062	2.0197	0.01082	0.13068	0.043415	0.67147
Nsmaf	4	-0.20822	-2.1308	0.010847	0.13077	0.033103	0.67147
Map2k6	4	-0.20822	-1.5785	0.010847	0.13077	0.11446	0.68874
Cnot2	4	0.20054	1.6328	0.010846	0.13077	0.10252	0.68346
Mum1l1	4	0.20043	1.659	0.010882	0.13089	0.09712	0.67975
Fdx1l	4	0.20041	1.002	0.010883	0.13089	0.31637	0.7943
Ttc29	4	0.20041	2.0309	0.010883	0.13089	0.04227	0.67147
Mastl	4	0.20039	1.1225	0.010887	0.13089	0.26163	0.76715
Gm14850	4	0.20039	1.4691	0.01089	0.13089	0.14181	0.70424
Vmn1r119	4	0.20025	1.0233	0.01093	0.13128	0.30619	0.7902
Prss51	4	-0.20797	-2.3045	0.010939	0.13131	0.021192	0.67147
Pcdha2	4	0.20017	1.7233	0.010961	0.1315	0.084828	0.67147
Lsm4	4	0.20015	1.3136	0.010968	0.13151	0.18899	0.72639
Nr2f1	4	-0.20779	-2.1415	0.011007	0.13186	0.032237	0.67147
Brip1	4	0.20004	2.2999	0.011011	0.13186	0.021454	0.67147
Cd248	4	-0.20757	-2.2932	0.011098	0.13282	0.021837	0.67147
Aup1	4	0.19979	1.5118	0.011113	0.13291	0.13059	0.69719
Eml5	4	0.19975	1.5276	0.011127	0.133	0.12662	0.6929
Brwd1	4	-0.20747	-2.7542	0.011141	0.13306	0.0058828	0.67147
Slit2	4	-0.20746	-2.8788	0.011145	0.13306	0.0039915	0.67147
Olfr1532-ps1	4	-0.20743	-2.8098	0.011157	0.13308	0.0049579	0.67147
AF067063	4	0.19964	1.7113	0.01116	0.13308	0.087031	0.67443
Gm11559	4	0.19957	1.2727	0.011185	0.13318	0.20311	0.73581
Rpl31	4	0.19955	1.0902	0.011189	0.13318	0.27564	0.77369
Gtf2f1	4	0.19954	1.4931	0.011189	0.13318	0.13542	0.70189
Slc30a9	4	0.19947	1.8027	0.011207	0.13331	0.071443	0.67147
Cyr61	4	0.19942	1.7731	0.011224	0.13344	0.076215	0.67147
Plekhg6	4	-0.20715	-2.5048	0.01126	0.13376	0.012251	0.67147
Ndufaf1	4	0.1993	1.5742	0.011265	0.13376	0.11543	0.68874
Ndufb7	4	-0.20704	-2.6643	0.011298	0.13382	0.0077144	0.67147
9330159F19Rik	4	0.19925	1.8768	0.011279	0.13382	0.060544	0.67147
Terf2	4	0.19922	1.0284	0.011289	0.13382	0.30375	0.78977
Tmem161a	4	0.19922	1.6077	0.011291	0.13382	0.10789	0.68435
Gfra3	4	0.19902	1.7435	0.011363	0.13451	0.081246	0.67147
Slc26a2	4	0.19898	1.3844	0.011378	0.13461	0.16625	0.71475
Polr3f	4	-0.20678	-1.2657	0.011398	0.13469	0.20561	0.73791
BC147527	4	0.19892	1.491	0.011395	0.13469	0.13597	0.70189
Myo16	4	0.19889	1.729	0.011409	0.13474	0.083813	0.67147
Mis18a	4	0.19886	0.94876	0.011424	0.13483	0.34274	0.80635
Clhc1	4	-0.20664	-2.0085	0.011449	0.13497	0.044594	0.67147
Pik3cb	4	0.19878	1.9607	0.011448	0.13497	0.049911	0.67147
Smim15	4	0.19859	1.7434	0.011513	0.13558	0.081264	0.67147
Tmem230	4	0.19857	1.6945	0.011515	0.13558	0.090174	0.67614
Adap2	4	0.19848	1.9049	0.011561	0.13604	0.05679	0.67147
Myo1a	4	-0.20626	-3.173	0.01159	0.13616	0.0015089	0.57278
Abl1	4	0.19838	1.8156	0.011598	0.13616	0.069435	0.67147
Pkib	4	0.19838	1.6757	0.011598	0.13616	0.09379	0.6783
Adam26b	4	0.19838	1.9863	0.011598	0.13616	0.046999	0.67147
Ints5	4	0.19832	1.7099	0.011617	0.13629	0.087277	0.67443
Ddt	4	-0.20616	-1.5964	0.011629	0.13635	0.11039	0.68624
Olfr517	4	-0.20615	-3.4536	0.011637	0.13637	0.00055318	0.41409
Prpf38a	4	0.19821	0.94932	0.011653	0.13648	0.34246	0.80635
Met	4	-0.20609	-1.7269	0.011676	0.13657	0.084181	0.67147
4931428F04Rik	4	-0.20608	-2.9089	0.011682	0.13657	0.0036271	0.67147
Ddx10	4	0.19819	1.6115	0.011669	0.13657	0.10706	0.68346
Fdxacb1	4	0.19797	1.6504	0.011747	0.13724	0.098864	0.67975
Trim62	4	0.19796	0.90686	0.011754	0.13725	0.36448	0.81686
Cyp2b9	4	0.19792	1.3976	0.011775	0.13741	0.16223	0.7123
Kdelc2	4	0.19789	1.9071	0.011783	0.13743	0.056513	0.67147
Ppp1r10	4	0.19774	1.4907	0.011837	0.13797	0.13605	0.70189
Sphk2	4	0.19769	1.7448	0.011858	0.13813	0.081027	0.67147
Taf1c	4	0.1976	1.4217	0.011901	0.13856	0.15513	0.70682
Col12a1	4	-0.20533	-1.8566	0.011979	0.13919	0.063367	0.67147
Ctbs	4	0.19745	2.0023	0.011967	0.13919	0.045255	0.67147
Kir3dl1	4	0.19743	1.8925	0.011977	0.13919	0.058427	0.67147
Rpa3	4	0.19741	1.2289	0.011984	0.13919	0.2191	0.74666
Necab1	4	0.19739	1.535	0.011991	0.13919	0.12479	0.6929
Chchd7	4	0.19728	1.3123	0.012024	0.13949	0.18943	0.72697
Igfals	4	-0.20512	-2.4822	0.012064	0.13987	0.013058	0.67147
Alg6	4	-0.20506	-1.9162	0.012086	0.13996	0.05534	0.67147
Vmn1r28	4	0.19712	1.175	0.012079	0.13996	0.23998	0.75704
Sorcs1	4	0.19703	2.0251	0.012116	0.14009	0.042856	0.67147
Tram1	4	0.19702	1.6868	0.012117	0.14009	0.091635	0.67816
Cdk9	4	0.19702	0.96599	0.012119	0.14009	0.33405	0.80362
Asun	4	0.19698	1.4782	0.01213	0.14014	0.13934	0.70278
Hmg20b	4	0.19686	1.9703	0.012175	0.14058	0.048808	0.67147
Rergl	4	0.19673	1.7033	0.012225	0.14105	0.088505	0.67496
Zdhhc7	4	0.19671	1.6098	0.012231	0.14105	0.10744	0.68366
Ssxb1	4	0.19666	1.4149	0.012246	0.14105	0.1571	0.70872
Olfr1116	4	0.19665	1.9432	0.012248	0.14105	0.051993	0.67147
Gemin5	4	0.19664	1.2972	0.012252	0.14105	0.19458	0.72967
Adat3	4	0.19652	1.8739	0.012299	0.14151	0.060948	0.67147
Lrrc56	4	-0.20449	-2.4301	0.012318	0.14165	0.015095	0.67147
Psma8	4	0.19639	1.8272	0.01235	0.14191	0.067672	0.67147
Atf6	4	0.19637	1.8528	0.012358	0.14191	0.063912	0.67147
Ccin	4	0.19635	1.8771	0.012363	0.14191	0.060508	0.67147
Tmigd1	4	0.19627	1.7187	0.012389	0.14213	0.085674	0.6734
Adamtsl1	4	0.19621	1.6374	0.012412	0.14231	0.10155	0.68223
Sdhaf2	4	0.19609	1.7056	0.012456	0.14267	0.088083	0.67496
Mrpl20	4	0.19607	1.6638	0.012457	0.14267	0.096147	0.67975
Atp2a2	4	0.19596	1.1221	0.01251	0.14319	0.26183	0.76741
Crlf3	4	0.19585	1.8844	0.012544	0.1434	0.059508	0.67147
Eaf1	4	0.19585	1.2623	0.012544	0.1434	0.20683	0.73795
Hist1h3b	4	0.19582	0.96446	0.012552	0.14341	0.33481	0.80386
Colq	4	-0.20385	-1.8998	0.012584	0.1437	0.057465	0.67147
Tcp11	4	-0.20373	-2.2673	0.012633	0.14418	0.023373	0.67147
Xylt1	4	-0.20367	-2.1885	0.012668	0.14446	0.028633	0.67147
Ints6	4	0.19548	1.7588	0.012673	0.14446	0.078611	0.67147
Chia1	4	-0.20355	-2.2617	0.012721	0.14484	0.023719	0.67147
Col10a1	4	0.19539	2.0531	0.012717	0.14484	0.040063	0.67147
Zfp781	4	0.19535	1.6619	0.012735	0.1449	0.096538	0.67975
Rnpc3	4	0.19533	1.0661	0.012741	0.1449	0.28636	0.78073
Apoc3	4	0.19525	2.2786	0.012774	0.14518	0.02269	0.67147
Med31	4	0.19522	2.1666	0.012781	0.14518	0.030267	0.67147
Fam227b	4	0.19519	1.6074	0.012796	0.14527	0.10797	0.68435
Foxd1	4	0.19512	1.677	0.012819	0.14544	0.093539	0.6783
Mrps14	4	0.1951	1.4694	0.012825	0.14544	0.14174	0.70424
Ces1f	3	-0.23704	-2.7404	0.012834	0.14545	0.0061364	0.67147
Cenpt	4	0.19503	1.2143	0.012857	0.14563	0.22465	0.74954
Ginm1	4	0.19499	1.8886	0.01287	0.1457	0.05895	0.67147
Ndufa6	4	-0.20315	-2.3698	0.012891	0.14573	0.0178	0.67147
Memo1	4	0.19494	1.7062	0.012899	0.14573	0.087972	0.67484
Chst4	4	0.19491	1.9959	0.012909	0.14573	0.045941	0.67147
Med29	4	0.19491	2.13	0.012909	0.14573	0.033174	0.67147
Tspan6	4	0.1949	1.5781	0.012916	0.14573	0.11455	0.68874
Eif3f	4	0.19489	1.1859	0.01292	0.14573	0.23567	0.75274
Gm1979	4	0.19488	0.78192	0.012925	0.14573	0.43426	0.84886
Slc16a5	4	-0.20297	-2.0283	0.01296	0.14604	0.04253	0.67147
Higd1c	4	0.19474	1.7887	0.012993	0.14633	0.073664	0.67147
Ssbp1	4	-0.20285	-1.7035	0.013006	0.1464	0.088473	0.67496
Rreb1	4	-0.20278	-1.6271	0.013044	0.14657	0.10371	0.68346
Rtfdc1	4	0.19458	1.8255	0.013038	0.14657	0.067933	0.67147
Exoc2	4	0.19458	1.7232	0.013036	0.14657	0.084855	0.67147
Gm20822	4	-0.20267	-2.4335	0.013091	0.14699	0.014955	0.67147
Wdr61	4	0.19442	1.5374	0.013104	0.14699	0.12419	0.6929
Taar6	4	0.19439	1.7983	0.013109	0.14699	0.072135	0.67147
Olfr881	4	0.19437	1.6288	0.013119	0.14699	0.10335	0.68346
Gm14151	4	0.19437	1.6013	0.013118	0.14699	0.10931	0.68526
Olfr340	4	-0.20247	-1.7503	0.013167	0.14713	0.080067	0.67147
Atp6ap2	4	0.19423	2.3521	0.013157	0.14713	0.018669	0.67147
Olfr133	4	0.19423	1.7875	0.013156	0.14713	0.073854	0.67147
Psmd3	4	0.19421	1.0648	0.013169	0.14713	0.28696	0.78112
Lce1d	4	0.19421	1.7558	0.013169	0.14713	0.079115	0.67147
Gpr1	4	0.19402	1.7027	0.01324	0.14784	0.088629	0.67496
Atxn1	4	0.19391	1.8506	0.013286	0.14827	0.064223	0.67147
Tmem169	4	-0.20214	-3.0308	0.013318	0.14855	0.0024394	0.65478
Vmn1r59	4	0.19372	1.6386	0.01336	0.14893	0.1013	0.682
Sstr2	4	-0.20204	-2.4043	0.013369	0.14895	0.016202	0.67147
Gm14137	4	0.19368	1.726	0.013384	0.14903	0.084356	0.67147
Wdr20rt	4	-0.2019	-2.3748	0.013426	0.14933	0.01756	0.67147
Lrrc16b	4	0.1936	1.9763	0.01342	0.14933	0.048124	0.67147
Vps33b	4	0.19345	1.3874	0.013482	0.14986	0.16531	0.71416
Ebf1	4	0.19339	2.2249	0.013503	0.15002	0.026089	0.67147
Atp5a1	4	0.19329	2.3588	0.013554	0.1505	0.018334	0.67147
Fkbp15	4	0.19323	2.3215	0.013579	0.15068	0.02026	0.67147
Olfr74	4	-0.20151	-2.0398	0.013598	0.15081	0.041368	0.67147
Rdh14	4	0.19306	1.7277	0.01365	0.1513	0.08404	0.67147
Tmprss3	4	0.19297	1.4895	0.013684	0.15155	0.13635	0.70189
Sbds	4	0.19296	1.4671	0.013687	0.15155	0.14234	0.70424
1700066M21Rik	4	0.19293	2.109	0.0137	0.1516	0.034946	0.67147
Sele	4	-0.20126	-2.3	0.013709	0.15161	0.021449	0.67147
H2afy2	4	0.1929	1.8325	0.013721	0.15166	0.066882	0.67147
Tnfsf8	4	0.19286	2.0366	0.01373	0.15168	0.041693	0.67147
Rexo4	4	0.19281	1.73	0.013753	0.15185	0.083634	0.67147
Entpd8	4	0.19277	1.5522	0.013766	0.1519	0.12062	0.68961
Kitl	3	-0.23439	-1.9918	0.013789	0.15199	0.046388	0.67147
Prkdc	4	0.19273	2.0964	0.013785	0.15199	0.036049	0.67147
Treml1	4	0.19267	1.7975	0.013812	0.15216	0.072253	0.67147
Coa6	4	-0.20099	-2.1151	0.013832	0.15221	0.034421	0.67147
Prop1	4	-0.20098	-2.2807	0.013833	0.15221	0.022566	0.67147
2810408M09Rik	4	0.19255	1.0169	0.013869	0.15246	0.3092	0.79078
Apobec3	4	0.19254	1.5491	0.01387	0.15246	0.12136	0.68961
Nsfl1c	4	0.19237	1.6598	0.013949	0.15323	0.096948	0.67975
Fcho2	4	-0.20066	-2.2544	0.013977	0.15337	0.024174	0.67147
5031414D18Rik	4	-0.20066	-2.4697	0.013977	0.15337	0.013524	0.67147
Phf5a	4	0.19227	0.84282	0.013993	0.15347	0.39933	0.83345
Vmn2r30	4	0.19207	0.92403	0.014075	0.15423	0.35547	0.81225
Ago1	4	0.19207	1.6929	0.014079	0.15423	0.090481	0.67684
Gm5168	4	0.19202	1.301	0.014096	0.15434	0.19324	0.72958
Sap30bp	4	0.19194	1.2728	0.014127	0.15453	0.20308	0.73581
Fam179b	4	0.1919	1.5108	0.014135	0.15453	0.13085	0.69719
Rln3	4	0.19189	1.6443	0.014138	0.15453	0.10012	0.68013
Ostn	4	-0.20022	-2.6716	0.014161	0.1547	0.0075496	0.67147
Otogl	4	-0.20006	-1.968	0.01423	0.15537	0.049067	0.67147
Sec61a2	4	-0.20004	-2.1672	0.014241	0.15541	0.030222	0.67147
Cdhr5	4	-0.19992	-2.243	0.014306	0.15594	0.024894	0.67147
Barx2	4	0.19149	1.2361	0.0143	0.15594	0.21644	0.74593
Cyp4a32	4	0.19144	2.2916	0.014322	0.15598	0.021929	0.67147
Olfr1377	4	0.19143	1.6201	0.014326	0.15598	0.10521	0.68346
Dck	4	0.1913	1.2585	0.014375	0.15638	0.20822	0.73903
Fam126b	4	0.19129	1.737	0.014382	0.15638	0.082378	0.67147
Runx2	4	0.19127	2.0782	0.014386	0.15638	0.037687	0.67147
Ccdc87	4	0.19114	2.1471	0.01444	0.15687	0.031786	0.67147
Abcb11	4	-0.1995	-2.2952	0.014514	0.15759	0.021722	0.67147
Ubr2	4	-0.19941	-1.6385	0.014567	0.15808	0.10132	0.682
Plekho2	4	-0.19937	-2.8588	0.014589	0.15824	0.0042523	0.67147
Vmn2r11	4	0.1908	1.8393	0.014612	0.1584	0.065877	0.67147
Ccdc126	4	-0.19931	-1.6998	0.014622	0.15841	0.089165	0.67507
Phf23	4	0.19075	1.4505	0.014634	0.15846	0.14692	0.7052
Krtap5-2	4	0.19066	1.6955	0.014679	0.15886	0.089977	0.67568
Gzf1	4	0.19059	1.4419	0.014722	0.15924	0.14933	0.7052
Spin2d	4	0.19057	1.7068	0.014734	0.15929	0.087856	0.67443
Hectd1	4	0.19055	2.1358	0.014749	0.15935	0.032694	0.67147
Nmrk1	4	-0.19889	-2.088	0.014798	0.1598	0.036795	0.67147
Wdr75	4	0.19039	0.89071	0.014841	0.16018	0.37309	0.8197
Aldh1l1	4	0.19036	2.1301	0.014853	0.16022	0.033166	0.67147
Tspan10	4	0.19034	1.4059	0.014866	0.16026	0.15974	0.70893
Pja1	4	-0.19866	-2.957	0.014902	0.16057	0.0031063	0.67147
Naa38	4	0.19025	2.2724	0.014918	0.16063	0.02306	0.67147
D830030K20Rik	4	0.19023	1.1789	0.014925	0.16063	0.23842	0.75591
Picalm	4	0.19015	2.3047	0.014949	0.16081	0.021186	0.67147
Guca1a	4	0.19007	1.6908	0.014988	0.16114	0.090881	0.67745
Ep300	4	0.19002	1.1884	0.015016	0.16125	0.23468	0.75195
Olfr1394	4	0.19001	1.9554	0.015022	0.16125	0.050538	0.67147
Edn3	4	0.19	1.6158	0.015023	0.16125	0.10615	0.68346
Pwp1	4	0.18997	1.4275	0.015035	0.1613	0.15345	0.70593
Cytip	4	0.1899	1.9607	0.015067	0.16152	0.049908	0.67147
Oxt	4	0.18988	1.4091	0.015079	0.16152	0.15881	0.70872
Ngef	4	0.18986	1.5679	0.015086	0.16152	0.11691	0.68961
Alg3	4	0.18985	1.7598	0.01509	0.16152	0.078448	0.67147
Med13l	4	0.18982	1.7549	0.015101	0.16152	0.079273	0.67147
Ccdc42	4	0.1898	2.0717	0.015105	0.16152	0.038289	0.67147
Amacr	4	0.1897	1.7206	0.01514	0.16178	0.085327	0.6726
Ttc4	4	0.18968	1.5432	0.015146	0.16178	0.12279	0.69026
Tmod3	4	-0.19809	-2.0396	0.015188	0.16214	0.041389	0.67147
Rhox2f	4	0.18956	1.6285	0.015202	0.1622	0.10341	0.68346
Ddx52	4	0.18948	1.5162	0.015232	0.16243	0.12947	0.6964
Ribc2	4	-0.19799	-2.3205	0.015244	0.16247	0.020313	0.67147
Impad1	4	-0.19791	-2.0407	0.015286	0.16279	0.041276	0.67147
Crebzf	4	0.18937	1.6765	0.01529	0.16279	0.093637	0.6783
Vwa3a	4	0.18928	2.006	0.015318	0.16296	0.044852	0.67147
Prmt1	4	0.18926	1.9454	0.015325	0.16296	0.05173	0.67147
Slc26a3	4	0.18925	1.4412	0.015331	0.16296	0.14952	0.7052
Trmt112	4	0.18918	0.93564	0.015366	0.16324	0.34946	0.80848
Mtor	4	-0.1977	-1.6599	0.015389	0.1634	0.096945	0.67975
Samd5	4	0.18909	1.5286	0.015417	0.1636	0.12635	0.6929
Erp44	4	-0.19756	-2.1819	0.015455	0.16392	0.029116	0.67147
Pvrl1	4	-0.19752	-2.4646	0.015473	0.16403	0.013715	0.67147
Gstt4	4	0.18896	1.9936	0.015486	0.16407	0.046201	0.67147
Jade3	4	-0.19746	-2.5736	0.015499	0.16412	0.010065	0.67147
Crk	4	-0.19738	-1.6864	0.015542	0.16449	0.091719	0.67816
Slc7a1	4	-0.19734	-2.1217	0.015565	0.16465	0.033864	0.67147
Ins2	4	-0.19731	-1.9586	0.015582	0.16471	0.050165	0.67147
Fbxw11	4	0.18871	1.787	0.015588	0.16471	0.073941	0.67147
Taar7d	4	0.18869	1.8946	0.015596	0.16471	0.058146	0.67147
Adrb3	4	-0.19717	-2.4756	0.015658	0.16501	0.013301	0.67147
Zfp687	4	0.1886	1.3912	0.015636	0.16501	0.16418	0.71269
Tssk4	4	0.18858	1.5984	0.015642	0.16501	0.10996	0.68624
Itpk1	4	0.18857	1.888	0.015649	0.16501	0.059028	0.67147
Ano6	4	0.18854	1.6087	0.015671	0.16505	0.10767	0.68409
Ralb	4	-0.19712	-1.9626	0.015684	0.1651	0.049689	0.67147
Dio2	4	0.18848	1.8096	0.015714	0.16534	0.070353	0.67147
Tmem189	4	0.18844	1.5947	0.015731	0.16542	0.11077	0.68729
Qdpr	4	0.188	1.7609	0.015944	0.16746	0.078261	0.67147
Ttf2	4	0.18799	1.8088	0.015948	0.16746	0.070475	0.67147
Coro1c	4	0.18798	1.6112	0.01595	0.16746	0.10714	0.68346
Fam134b	4	0.18778	1.9584	0.016046	0.16837	0.050182	0.67147
Zfp143	4	0.18774	2.4328	0.016066	0.1685	0.014982	0.67147
Iqcf4	4	0.18769	1.4035	0.016095	0.16862	0.16046	0.70913
4930453N24Rik	4	0.18769	1.801	0.016094	0.16862	0.071703	0.67147
Ptger1	4	-0.19619	-1.9065	0.016124	0.16865	0.056583	0.67147
Serf1	4	-0.19619	-2.3153	0.016124	0.16865	0.020595	0.67147
Rnf113a2	4	-0.19619	-1.816	0.016124	0.16865	0.069375	0.67147
Fshb	4	-0.1961	-2.035	0.016173	0.16898	0.041847	0.67147
St8sia1	4	0.18754	1.771	0.016181	0.16898	0.076561	0.67147
Msantd2	4	0.18754	1.8041	0.016181	0.16898	0.071217	0.67147
Syt15	4	0.18734	1.739	0.016284	0.16996	0.082043	0.67147
Lelp1	4	0.18732	2.1731	0.016293	0.16997	0.029774	0.67147
Gm14393	4	0.18723	1.0214	0.01633	0.17024	0.30707	0.79023
Vmn1r216	4	0.18722	1.1999	0.016336	0.17024	0.23018	0.74954
Gfy	4	-0.19576	-1.9844	0.016351	0.1703	0.047213	0.67147
Sppl2a	4	0.18711	2.0703	0.016387	0.17059	0.038425	0.67147
Tmem233	4	-0.19566	-2.729	0.016399	0.17063	0.0063529	0.67147
1700018F24Rik	4	-0.19558	-2.701	0.016449	0.17079	0.0069138	0.67147
Il21	4	0.18704	2.4564	0.016427	0.17079	0.014035	0.67147
Hist2h2aa1	4	0.18702	1.305	0.016433	0.17079	0.19188	0.72904
Foxc1	4	0.18698	2.108	0.016449	0.17079	0.03503	0.67147
Large	4	0.18694	1.6984	0.016476	0.17091	0.089431	0.67519
Cdc42ep2	4	0.18693	1.5485	0.016479	0.17091	0.1215	0.68961
Zc3h4	4	0.18691	1.3717	0.016487	0.17091	0.17016	0.71564
Rap1gap	4	0.18685	1.7325	0.016514	0.1711	0.083184	0.67147
Nfix	4	0.18677	2.2336	0.016553	0.17129	0.025512	0.67147
Txlnb	4	0.18677	1.9736	0.016554	0.17129	0.048432	0.67147
2310061N02Rik	4	0.18675	1.3034	0.016559	0.17129	0.19243	0.72904
Mfsd10	4	0.18672	2.0412	0.016579	0.17141	0.041235	0.67147
Espl1	4	0.1867	0.99035	0.01659	0.17143	0.322	0.79634
Olfr1107	4	0.18666	2.0625	0.016614	0.17159	0.03916	0.67147
Dnah2	4	0.18664	1.759	0.016627	0.17164	0.078582	0.67147
Ndufaf7	4	-0.19516	-2.9194	0.016681	0.17201	0.0035072	0.67147
Rps3	4	0.18655	0.65616	0.016679	0.17201	0.51172	0.87801
Mageb16	4	0.18646	1.5216	0.016733	0.17244	0.12812	0.69499
Luzp2	4	0.18642	1.473	0.016752	0.17244	0.14076	0.70424
Hnrnpc	4	0.18641	1.065	0.016755	0.17244	0.28689	0.78104
Pbx4	4	0.18641	1.8519	0.016757	0.17244	0.064038	0.67147
Ptpn2	4	0.18635	2.0368	0.016785	0.17257	0.041675	0.67147
C530008M17Rik	4	0.18634	1.6787	0.016791	0.17257	0.093207	0.6783
Arnt2	4	0.18632	1.7344	0.016797	0.17257	0.082846	0.67147
Sult1c2	4	0.18622	1.7563	0.016847	0.173	0.079044	0.67147
Ccdc50	4	0.18617	2.047	0.016865	0.17309	0.040654	0.67147
Aqp2	4	-0.19465	-2.1894	0.016943	0.17381	0.028566	0.67147
Olfr763	4	0.18595	1.9211	0.016974	0.17392	0.054724	0.67147
Vmn1r10	4	0.18594	1.4662	0.016977	0.17392	0.1426	0.70438
Ldlrad1	4	0.18591	1.6537	0.016981	0.17392	0.098181	0.67975
Tomm22	4	0.18589	1.6992	0.01699	0.17392	0.089283	0.67507
Defb20	4	-0.1945	-1.9414	0.017022	0.17415	0.052206	0.67147
Elk3	4	0.18577	1.8606	0.017046	0.17431	0.062798	0.67147
Gdi2	4	0.18573	1.4438	0.017069	0.17446	0.14878	0.7052
Hyls1	4	0.18568	1.3196	0.017097	0.17461	0.18697	0.72563
Tmem150a	4	0.18567	1.4773	0.017102	0.17461	0.13958	0.70278
Olfr119	4	-0.19429	-1.5772	0.017133	0.17484	0.11476	0.68874
4930449I24Rik	4	0.18554	1.4297	0.01718	0.17523	0.1528	0.70533
Grcc10	4	0.18548	1.5602	0.017208	0.17542	0.11871	0.68961
Lig1	4	0.18539	2.1998	0.017252	0.17578	0.027823	0.67147
Ino80	4	0.18517	1.8201	0.017364	0.1767	0.068745	0.67147
Utp15	4	0.18517	0.98536	0.017365	0.1767	0.32445	0.79724
Dgki	4	0.18516	1.5561	0.017369	0.1767	0.11967	0.68961
Cd163l1	4	-0.19383	-1.5711	0.017407	0.17689	0.11615	0.68874
Lamtor2	4	0.18508	1.5291	0.017415	0.17689	0.12623	0.6929
Hist1h4m	4	0.18508	1.3745	0.017414	0.17689	0.16928	0.71564
Reg1	4	0.18501	2.0932	0.017445	0.17711	0.036333	0.67147
Stk40	4	0.18499	2.1835	0.017459	0.17715	0.028999	0.67147
Sfxn1	4	0.18496	1.5828	0.017473	0.17715	0.11347	0.68874
Pdcd1lg2	4	0.18496	1.7645	0.017476	0.17715	0.077642	0.67147
Dusp14	3	-0.22536	-2.8999	0.017515	0.17736	0.0037323	0.67147
Pnkp	3	0.21751	1.602	0.017526	0.17736	0.10916	0.68526
Pde3a	4	0.18489	1.8394	0.017516	0.17736	0.06585	0.67147
Crnkl1	4	0.18483	0.48956	0.017536	0.17736	0.62445	0.91476
Vmn2r19	4	0.18481	1.8374	0.017543	0.17736	0.066151	0.67147
Htr3b	4	0.18475	1.5797	0.017572	0.17736	0.11417	0.68874
Olfr1052	4	0.18475	1.9647	0.017572	0.17736	0.049454	0.67147
Atp5k	4	0.18474	1.8272	0.017576	0.17736	0.067677	0.67147
Hmgcs2	4	0.18472	1.9292	0.017584	0.17736	0.05371	0.67147
Nacc1	4	0.18471	1.4894	0.017587	0.17736	0.13638	0.70189
Zfp750	4	0.18466	1.599	0.017617	0.17757	0.10981	0.68624
Atxn2l	4	-0.19339	-2.7834	0.017663	0.17783	0.0053788	0.67147
Grap2	4	0.18458	2.1675	0.017657	0.17783	0.0302	0.67147
Klhdc2	4	0.18455	1.6075	0.01767	0.17783	0.10794	0.68435
Orc3	4	0.18451	1.6389	0.017685	0.17789	0.10124	0.682
Mgat3	4	-0.19329	-3.3523	0.017727	0.1781	0.00080144	0.42726
Tbc1d22a	4	0.1844	1.7172	0.017741	0.1781	0.085938	0.67368
Tprkb	4	0.18439	1.6895	0.017742	0.1781	0.091121	0.67745
Cyp3a16	4	0.18438	1.4891	0.017742	0.1781	0.13646	0.70189
Cyb5a	4	0.18437	1.6817	0.017751	0.1781	0.092617	0.6783
Chrne	4	-0.19309	-2.2547	0.017824	0.17855	0.024155	0.67147
Serbp1	4	0.18424	1.4381	0.01782	0.17855	0.1504	0.7052
Slc43a2	4	0.18424	1.3424	0.01782	0.17855	0.17946	0.72213
Elmo2	4	-0.19306	-1.6029	0.017841	0.17864	0.10897	0.68522
Dguok	4	0.18413	2.1316	0.017889	0.17902	0.03304	0.67147
Golga2	4	0.1841	1.9258	0.017903	0.17907	0.054131	0.67147
Gm5082	4	-0.19289	-2.8222	0.017921	0.17917	0.0047689	0.67147
Kctd21	4	0.18403	0.72917	0.017943	0.17924	0.4659	0.85917
Zfp879	4	0.18402	1.9688	0.017947	0.17924	0.048976	0.67147
Sptb	4	-0.19282	-2.0766	0.017958	0.17926	0.037841	0.67147
Trib1	4	0.18398	2.051	0.017973	0.17932	0.040269	0.67147
Zfp541	4	0.18387	1.8902	0.018038	0.17988	0.058732	0.67147
Tango2	4	0.18385	1.3719	0.018058	0.17999	0.1701	0.71564
Slc22a20	4	-0.1926	-2.4696	0.01808	0.18004	0.013528	0.67147
Wdr12	4	0.1838	1.8138	0.018082	0.18004	0.069704	0.67147
Ulk4	4	-0.19245	-2.1484	0.018164	0.18071	0.031685	0.67147
Gm10662	4	0.18365	1.1411	0.018167	0.18071	0.25382	0.76139
Olfr243	4	-0.19236	-1.6437	0.018222	0.18107	0.10025	0.68013
Rtp1	4	0.18355	1.5986	0.018214	0.18107	0.10992	0.68624
Zbtb40	4	0.18349	1.9581	0.018241	0.18117	0.050222	0.67147
Aanat	4	0.18343	1.7664	0.018281	0.18139	0.077322	0.67147
Ddx47	4	0.18343	0.9939	0.018282	0.18139	0.32027	0.79542
Tank	4	0.18341	2.0069	0.018291	0.18139	0.044765	0.67147
Napsa	4	-0.19221	-2.0997	0.018309	0.18147	0.035755	0.67147
Pgk1	4	0.18338	1.76	0.01832	0.18149	0.078413	0.67147
Ndnl2	4	0.18335	1.6215	0.018338	0.18158	0.10492	0.68346
Fshr	4	0.1833	1.8953	0.018378	0.18184	0.058049	0.67147
Lrr1	4	0.18328	0.84839	0.018383	0.18184	0.39622	0.83216
Ccser1	4	0.1832	1.7071	0.018425	0.18217	0.08781	0.67443
Rnasek	4	0.18315	1.8335	0.018449	0.18231	0.066727	0.67147
Zfp358	4	-0.19187	-2.2642	0.018519	0.18264	0.023559	0.67147
Zbbx	4	-0.19183	-1.6155	0.018538	0.18264	0.1062	0.68346
Cbx2	4	0.18304	1.5081	0.018521	0.18264	0.13154	0.69929
Sf3a2	4	0.18304	1.2928	0.018522	0.18264	0.19606	0.73121
Fam175a	4	0.18304	1.633	0.018522	0.18264	0.10247	0.68346
Anapc4	4	0.18302	1.1722	0.018533	0.18264	0.2411	0.75831
Olfr772	4	-0.19178	-2.0675	0.018576	0.18292	0.03869	0.67147
Elmod3	4	0.18292	1.3806	0.018599	0.18306	0.16741	0.71533
[truncated: 17,675 more rows]

## Sheet: Ranked gRNA negative hits
sequence	sgRNA	Gene	control_mean	treat_mean	LFC	p.low	p.high	p.twosided	FDR.twosided
GAACGAGTTCATGATGCCCA	000069293	Hist1h2bk	58.781	0	-5.9016	0.0021724	0.99783	0.0043448	0.021006
GAACGAGTTCATGATGCCCA	000069293	Hist1h2bk	51.876	0	-5.7245	0.0027478	0.99725	0.0054956	0.025098
TCCGCTCCCGCCCCGAAGAA	000069294	Hist1h2bk	34.33	0	-5.1428	0.0055337	0.99447	0.011067	0.042631
TGGAGGAGATGCCGGTGTCG	000069295	Hist1h2bk	50.109	1.325	-4.4583	0.0042278	0.99577	0.0084556	0.034731
TTACCTTAAAGTGAACACGA	000069331	Rpl17	74	0.92863	-5.2812	0.0013623	0.99864	0.0027247	0.014733
TTACCTTAAAGTGAACACGA	000069331	Rpl17	31.8	0	-5.0356	0.0062312	0.99377	0.012462	0.046602
TGGAGTTGGTAGGTGCGCCC	000069330	Rpl17	28.909	0	-4.9025	0.0071933	0.99281	0.014387	0.05187
AGCAATGTGTGCCATTCCGG	000069328	Rpl17	54.927	1.325	-4.5883	0.003569	0.99643	0.0071381	0.030532
ACACCGGAGGAGGCCAAGGT	000015022	Rps4x	53.963	0	-5.7804	0.0025547	0.99745	0.0051093	0.023752
ACTCACCCATAAACCCAGCA	000015023	Rps4x	51.072	0	-5.7024	0.0028273	0.99717	0.0056547	0.025631
TGAGGACCAGTGGATGGACG	000015025	Rps4x	22.886	0	-4.5781	0.010044	0.98996	0.020089	0.066699
ACACCGGAGGAGGCCAAGGT	000015022	Rps4x	36.618	0.92863	-4.2858	0.0049943	0.99501	0.0099887	0.039429
GACTGGTGGGATGAAGGTGA	000014989	Rps14	108.89	0	-6.7799	0.0005535	0.99945	0.001107	0.0073639
CTCGGCAGATGGTTTCCCTG	000014988	Rps14	108.33	0.92863	-5.825	0.00056084	0.99944	0.0011217	0.0074433
CAACATGGCTGCATATGGAG	000014986	Rps14	136.56	3.7145	-4.8668	0.0012807	0.99872	0.0025614	0.014064
CATTGAAGGATGCAAAGATG	000014987	Rps14	19.835	0	-4.3809	0.012185	0.98782	0.02437	0.077072
GGACAAGATCTACCTGATCG	000068821	Gins2	326.67	5.2999	-5.7008	7.5887e-05	0.99992	0.00015177	0.00148
GGACACTGATCAAAGACCTG	000068822	Gins2	137.8	2.6499	-5.249	0.00086838	0.99913	0.0017368	0.010421
TCCATTCCGGAGGTAACAGG	000068823	Gins2	274.63	6.6249	-5.1759	0.00021024	0.99979	0.00042048	0.0034162
TCCATTCCGGAGGTAACAGG	000068823	Gins2	205.22	5.5718	-4.9717	0.00053938	0.99946	0.0010788	0.007219
CAGAGTTCCTAACTGCAACG	000018363	Uba3	768.01	30.474	-4.6108	3.4114e-06	1	6.8227e-06	9.8255e-05
CAGAGTTCCTAACTGCAACG	000018363	Uba3	745.34	31.573	-4.5181	4.5501e-06	1	9.1002e-06	0.00012711
AGTATGTGAGGATGTTGCAA	000018362	Uba3	1999.5	129.85	-3.9344	1.4578e-09	1	2.9156e-09	8.0555e-08
AGTATGTGAGGATGTTGCAA	000018362	Uba3	2134.5	208.01	-3.3529	2.4546e-09	1	4.9092e-09	1.3103e-07
CCAGGTCGATCAGATCGCTG	000002044	Capzb	1172.6	26.002	-5.4417	5.8767e-08	1	1.1753e-07	2.442e-06
CCAGGTCGATCAGATCGCTG	000002044	Capzb	1265.2	46.374	-4.7403	6.097e-08	1	1.2194e-07	2.5279e-06
AGCCATGATCAAGATCCCAG	000002041	Capzb	2768.5	119.25	-4.5255	5.3972e-12	1	1.0794e-11	4.2648e-10
AGCCATGATCAAGATCCCAG	000002041	Capzb	2667	139.29	-4.2493	1.5722e-11	1	3.1444e-11	1.1709e-09
TATCATGAATACCTTCAGTG	000018261	Tubb5	183.09	1.8573	-6.0097	0.00024704	0.99975	0.00049409	0.0038898
GATCCACCAAGATAGCTCGA	000018259	Tubb5	278.45	5.5718	-5.4102	0.00016345	0.99984	0.0003269	0.0027869
GAGGTGATAAGCGATGAACA	000018258	Tubb5	238.78	4.6431	-5.4091	0.00025028	0.99975	0.00050057	0.0039306
GAGGTGATAAGCGATGAACA	000018258	Tubb5	104.07	7.9498	-3.5534	0.0063401	0.99366	0.01268	0.047225
ACACAATCTGGCTAATAAGG	000018238	Tuba1c	103.11	0	-6.7019	0.00063506	0.99936	0.0012701	0.0082004
GAGCCGCTCCATCAGCAGGG	000018241	Tuba1c	86.206	0.92863	-5.4988	0.00097288	0.99903	0.0019458	0.011387
GAGCCGCTCCATCAGCAGGG	000018241	Tuba1c	71.308	1.325	-4.9589	0.0021256	0.99787	0.0042511	0.020659
CACAGCAGTGGAAACCTGGG	000018239	Tuba1c	51.072	1.325	-4.4852	0.0040839	0.99592	0.0081678	0.033855
CTGTTGGAAAACCTCGATTG	000026415	Med12	1938.5	64.075	-4.8974	4.9505e-10	1	9.9009e-10	2.942e-08
GAGGACCGGATTCCAACAGT	000026416	Med12	2599.9	125.87	-4.3575	1.9012e-11	1	3.8023e-11	1.3972e-09
CATATCTTTACAGTACTCAG	000026414	Med12	3001.2	251.66	-3.5708	1.2544e-11	1	2.5087e-11	9.4485e-10
GAGGACCGGATTCCAACAGT	000026416	Med12	2765.5	256.3	-3.4265	6.5666e-11	1	1.3133e-10	4.4853e-09
TGCATGCTTAAAAGCATCGT	000004792	Eif2s1	119.01	2.7859	-4.9864	0.0013772	0.99862	0.0027543	0.014856
TGCATGCTTAAAAGCATCGT	000004792	Eif2s1	114.67	5.2999	-4.1986	0.0030753	0.99692	0.0061507	0.02731
TAGGCGTTTGACCCCACAAG	000004790	Eif2s1	38.545	1.325	-4.0882	0.006645	0.99335	0.01329	0.048852
TAGGCGTTTGACCCCACAAG	000004790	Eif2s1	25.938	0.92863	-3.804	0.0084246	0.99158	0.016849	0.058402
CATAGTCCAGCCCTAGACGC	000001446	Phb2	235.73	6.5004	-4.9801	0.0003822	0.99962	0.00076441	0.0055097
CATAGTCCAGCCCTAGACGC	000001446	Phb2	245.72	10.6	-4.4107	0.00057428	0.99943	0.0011486	0.0075796
TGGGTCGGGACAGCACACGC	000001448	Phb2	225.49	13.25	-3.9904	0.00106	0.99894	0.00212	0.012157
TCTATGACCGCCTTCCACTG	000001447	Phb2	440.95	71.504	-2.6077	0.00071952	0.99928	0.001439	0.0090142
TTATCGAAATGGTTACCATG	000041952	Metap1	193.77	3.7145	-5.3685	0.00042354	0.99958	0.00084709	0.0059698
TTCTTACTAAGTGTACAGCG	000041953	Metap1	183.85	3.7145	-5.2931	0.00050686	0.99949	0.0010137	0.00687
TGTACCGATAGCCTGCCCAT	000041951	Metap1	454.83	21.2	-4.3599	7.1837e-05	0.99993	0.00014367	0.001414
TTATCGAAATGGTTACCATG	000041952	Metap1	197.54	9.2748	-4.2723	0.0011114	0.99889	0.0022228	0.012604
CGGGTCCTCGAACTCAACGA	000049974	Srsf1	296.76	9.2863	-4.8554	0.0002215	0.99978	0.000443	0.0035611
ACCTCCGGATATCCGAACCA	000049972	Srsf1	346.35	11.144	-4.8381	0.00013414	0.99987	0.00026827	0.0023709
CTTAAAGGATCACATGCGTG	000049975	Srsf1	268.53	12.072	-4.3659	0.00046782	0.99953	0.00093564	0.0064598
CGGGTCCTCGAACTCAACGA	000049974	Srsf1	246.69	11.925	-4.2603	0.00065305	0.99935	0.0013061	0.0083792
AAGAAGAGCGAGGAATTGCG	000003649	Smc3	482.9	21.358	-4.4358	5.1072e-05	0.99995	0.00010214	0.0010595
AGCTCAATGAAAACCTACGC	000003650	Smc3	983.86	64.924	-3.9011	1.4209e-06	1	2.8419e-06	4.4655e-05
TCTGCTAAGCGAGAAACGAG	000003652	Smc3	677.44	62.218	-3.4238	3.0313e-05	0.99997	6.0627e-05	0.00067559
AGTTATTCATTACGATGCCA	000003651	Smc3	1500.6	158.79	-3.2322	1.3799e-07	1	2.7598e-07	5.3468e-06
GAACGAACCCAAGTACAAGG	000007566	Hgs	676.47	26.499	-4.6227	7.3666e-06	0.99999	1.4733e-05	0.00019548
TCTCCAGCAGTACCAGAATG	000007568	Hgs	16.382	0	-4.1195	0.015589	0.98441	0.031178	0.092788
GAACGAACCCAAGTACAAGG	000007566	Hgs	563.01	40.86	-3.7521	5.1559e-05	0.99995	0.00010312	0.0010676
TAATGATAAGAACCCACACG	000007567	Hgs	639.3	122.58	-2.3733	0.00026125	0.99974	0.0005225	0.0040694
TAGCTGTAACAACTCTCGGG	000013873	Psmb7	141.9	1.8573	-5.6442	0.00054881	0.99945	0.0010976	0.0073138
AACTGGCACTACCATCGCGG	000013871	Psmb7	354.61	9.2748	-5.1131	9.6208e-05	0.9999	0.00019242	0.0018055
AACTGGCACTACCATCGCGG	000013871	Psmb7	352.45	13.929	-4.5653	0.00016187	0.99984	0.00032373	0.0027654
AAATTGCCTTATGTCACCAT	000013870	Psmb7	728.5	45.049	-3.9857	9.5457e-06	0.99999	1.9091e-05	0.00024528
GTACTTGCCACCAGCCACAC	000051751	Eif4a3	124.31	1.325	-5.7521	0.0005621	0.99944	0.0011242	0.0074558
GGACTACGGACAGCACGTGG	000051750	Eif4a3	49.587	0	-5.6607	0.0029825	0.99702	0.005965	0.026677
CTCACCGCTTCACCAAGATG	000051749	Eif4a3	82.391	0.92863	-5.4343	0.0010776	0.99892	0.0021553	0.012308
CGGCATCTACGCCTACGGTG	000051748	Eif4a3	11.564	0	-3.6512	0.023692	0.97631	0.047385	0.12685
GAGCCAAAGCTAACGCCCGA	000036584	Nipbl	1452.2	84.798	-4.0821	3.843e-08	1	7.6861e-08	1.6521e-06
AGGGTAAACTAACCTCCATG	000036582	Nipbl	339.2	22.525	-3.8541	0.00036988	0.99963	0.00073976	0.0053686
CAACAGTCAATAAGCCCGAG	000036583	Nipbl	214.89	22.525	-3.198	0.002627	0.99737	0.0052541	0.024254
CAACAGTCAATAAGCCCGAG	000036583	Nipbl	453.92	57.575	-2.9572	0.00037709	0.99962	0.00075418	0.0054508
TGAACCACATGGCTATGACG	000018141	Tsc2	714.06	13.929	-5.5818	2.1471e-06	1	4.2942e-06	6.4757e-05
CAGCTCCAAAGACCCTTGAG	000018139	Tsc2	571.4	32.502	-4.0947	3.235e-05	0.99997	6.4699e-05	0.00071535
TGAACCACATGGCTATGACG	000018141	Tsc2	555.05	31.799	-4.0835	3.7893e-05	0.99996	7.5786e-05	0.00082138
CACAGGGTGATAATGAACAG	000018138	Tsc2	679.36	43.724	-3.9272	1.5429e-05	0.99998	3.0859e-05	0.00037509
TGACCCGGTAACGAGGACAA	000028233	Slmo2	242.83	6.6249	-4.999	0.00034765	0.99965	0.0006953	0.0051119
AAACCCCATGAACCCGAGTG	000028230	Slmo2	405.69	29.149	-3.7537	0.00021531	0.99978	0.00043062	0.0034827
AAACCCCATGAACCCGAGTG	000028230	Slmo2	492.82	45.503	-3.4086	0.00014583	0.99985	0.00029165	0.0025385
ATATGGTCTCAGTAGATGAG	000028231	Slmo2	208.14	19.875	-3.3247	0.0024688	0.99753	0.0049376	0.023161
AATGCCTGTGGTACGACCAG	000000165	Actb	478.33	6.5004	-5.9979	1.2882e-05	0.99999	2.5765e-05	0.00032044
CAGCACAGGGTGCTCCTCAG	000000167	Actb	178.27	7.9498	-4.3241	0.0013179	0.99868	0.0026358	0.014371
ATGGAGGGGAATACAGCCCG	000000166	Actb	731.39	35.774	-4.3158	6.3653e-06	0.99999	1.2731e-05	0.00017169
ATGGAGGGGAATACAGCCCG	000000166	Actb	994.04	66.861	-3.8741	1.3666e-06	1	2.7332e-06	4.3072e-05
ATGCAGCCTCTAACCGACGC	000017119	Tbca	623.47	41.074	-3.8916	2.5872e-05	0.99997	5.1743e-05	0.00058942
ATGCAGCCTCTAACCGACGC	000017119	Tbca	826.2	68.718	-3.5686	7.6069e-06	0.99999	1.5214e-05	0.00020092
ACTCTTGCAGGATCTCTGCC	000017118	Tbca	1082.5	104.01	-3.3672	1.6154e-06	1	3.2308e-06	5.0125e-05
TCAAGACCGGAGTAGTGAGG	000017121	Tbca	303.63	41.788	-2.8318	0.0016888	0.99831	0.0033775	0.017343
GTGTGATGAACAAGAGCCCC	000075426	C130026I21Rik	225.49	6.6249	-4.8926	0.000463	0.99954	0.00092601	0.0064061
CGTACACGACTCTCTCCACT	000075425	C130026I21Rik	126.24	5.2999	-4.336	0.0023694	0.99763	0.0047388	0.02245
AGTCTCCTTTAAGTCGGGGT	000075424	C130026I21Rik	115.64	6.6249	-3.9351	0.0038838	0.99612	0.0077675	0.032581
AGCCTCCCACAATGCAATGG	000075423	C130026I21Rik	78.054	7.9498	-3.1429	0.012592	0.98741	0.025183	0.079015
TATAGGCCCATTACAACGAG	000077412	Gm15319	89.257	0	-6.496	0.00089802	0.9991	0.001796	0.010701
CGTATTGCTCACCCACAATG	000077410	Gm15319	113.71	1.325	-5.6246	0.00071314	0.99929	0.0014263	0.0089528
ATGTGGATGAATCTGATAGG	000077409	Gm15319	145.71	2.7859	-5.2762	0.0007776	0.99922	0.0015552	0.0095634
TATAGGCCCATTACAACGAG	000077412	Gm15319	112.74	3.9749	-4.515	0.0023346	0.99767	0.0046691	0.022204
GGAGCACATCCACTCCAACG	000055362	Eif2b2	141.65	2.6499	-5.2885	0.00080144	0.9992	0.0016029	0.0097982
GGAGCACATCCACTCCAACG	000055362	Eif2b2	88.494	1.8573	-4.9691	0.0018775	0.99812	0.003755	0.01881
GGATGTCAAGAGTTTGTGCA	000055363	Eif2b2	390.27	11.925	-4.92	7.9753e-05	0.99992	0.00015951	0.0015429
AATGATGTTGGCCTTAAGTG	000055360	Eif2b2	221.63	7.9498	-4.6367	0.00060912	0.99939	0.0012182	0.0079401
TTCATTCTCAAAAACCCACC	000055435	Eif5	419.59	12.072	-5.0078	5.5011e-05	0.99994	0.00011002	0.0011266
TTCATTCTCAAAAACCCACC	000055435	Eif5	594.56	19.875	-4.8344	1.2374e-05	0.99999	2.4748e-05	0.00030922
AAGCTGCAAGACATGTTGGA	000055432	Eif5	510.72	17.225	-4.8114	2.7394e-05	0.99997	5.4788e-05	0.00061918
ATACTCACCACAGCATGTGG	000055433	Eif5	601.3	50.349	-3.5521	4.7652e-05	0.99995	9.5304e-05	0.00099842
ACTGCGATTCCAGTCCACGA	000024846	Actl6a	232.23	3.9749	-5.551	0.00023545	0.99976	0.00047089	0.0037445
AGCCGTGGGGAAATCAACCT	000024847	Actl6a	366.18	10.215	-5.033	9.1853e-05	0.99991	0.00018371	0.0017364
ACTGCGATTCCAGTCCACGA	000024846	Actl6a	270.82	7.429	-5.0112	0.00025394	0.99975	0.00050787	0.003977
CCTTCTCTAGTGGAACACCA	000024848	Actl6a	172.41	5.5718	-4.7218	0.00097942	0.99902	0.0019588	0.011448
ATAGTAAAGAGGCCAGCATT	000077650	Gm14632	121.3	1.8573	-5.4196	0.00085292	0.99915	0.0017058	0.010282
CTGTGGGTGATACCAAAGGA	000077652	Gm14632	37.581	0	-5.2698	0.0047893	0.99521	0.0095786	0.038171
TAAGTGGTGAACAGCAAGTT	000077653	Gm14632	87.69	1.325	-5.2535	0.0013489	0.99865	0.0026978	0.014622
CTGTGGGTGATACCAAAGGA	000077652	Gm14632	32.804	0.92863	-4.1315	0.0059401	0.99406	0.01188	0.04497
GGAGCGAATCAAGGAGCGTG	000011469	Nedd8	309.32	13.25	-4.4448	0.00028246	0.99972	0.00056493	0.0043287
AGACATCGAACCCACAGACA	000011466	Nedd8	1117.8	66.249	-4.0563	4.2318e-07	1	8.4635e-07	1.4921e-05
ATGCTAATTAAAGTGAAGGT	000011467	Nedd8	598.86	74.29	-2.9941	0.00010904	0.99989	0.00021808	0.0019975
GGAGCGAATCAAGGAGCGTG	000011469	Nedd8	450.86	72.433	-2.6214	0.00064985	0.99935	0.0012997	0.0083532
GCATGAGAAACGAATGTCGA	000011556	Nfib	933.75	58.299	-3.9785	1.8751e-06	1	3.7501e-06	5.7298e-05
GCATGAGAAACGAATGTCGA	000011556	Nfib	917.75	161.58	-2.4985	3.1844e-05	0.99997	6.3689e-05	0.0007057
TAGGCAATTGCACGGACGTG	000011557	Nfib	882.68	168.27	-2.3842	5.3284e-05	0.99995	0.00010657	0.0010972
CTGGCGTCTGGATCTAGTCA	000011555	Nfib	1681.4	335.23	-2.323	8.8017e-07	1	1.7603e-06	2.8966e-05
TGCTTCGAATACTAGTGCTA	000012605	Pcna	175.38	7.9498	-4.3007	0.0013915	0.99861	0.0027831	0.014977
ATACGTGCAAATTCACCCGA	000012602	Pcna	168.63	7.9498	-4.2444	0.0015825	0.99842	0.0031649	0.016515
GCGCAGAGTAAGCTGTACCA	000012604	Pcna	155.14	7.9498	-4.1249	0.002062	0.99794	0.0041239	0.02018
GATATCCTGTGCAAAGAATG	000012603	Pcna	119.49	7.9498	-3.7509	0.0044064	0.99559	0.0088129	0.035827
GCTTCCGATAGTACACACAT	000018369	Uba1	226.45	6.6249	-4.8987	0.00045558	0.99954	0.00091115	0.0063263
ATGACCAAGGAACTACCCAG	000018366	Uba1	401.83	14.575	-4.6929	8.7516e-05	0.99991	0.00017503	0.0016678
ATGACCAAGGAACTACCCAG	000018366	Uba1	287.61	10.215	-4.6856	0.00028463	0.99972	0.00056926	0.0043554
GCTTCCGATAGTACACACAT	000018369	Uba1	201.4	11.144	-4.059	0.0012967	0.9987	0.0025934	0.014199
CTCACCGCTGAAGACCATGG	000001322	Atp6v0c	160.93	6.6249	-4.4085	0.0014873	0.99851	0.0029747	0.015752
TCGCAGCCATGTCAGTCATG	000001324	Atp6v0c	267.89	17.225	-3.883	0.00074609	0.99925	0.0014922	0.0092674
CGAAAAACGAAGAATATTCG	000001321	Atp6v0c	137.8	10.6	-3.5808	0.0041815	0.99582	0.0083629	0.034456
CTCACCGCTGAAGACCATGG	000001322	Atp6v0c	135.79	14.858	-3.1087	0.0067651	0.99323	0.01353	0.04952
GTCCGGGCCTCGATCCGCTG	000040925	Mau2	2303.1	169.6	-3.7555	3.4931e-10	1	6.9863e-10	2.1265e-08
CATTATTCCTGCTCAGCAAG	000040922	Mau2	1404.5	127.22	-3.4543	1.5718e-07	1	3.1437e-07	6.0185e-06
GGAAGCCAGCCTTACCCGAA	000040923	Mau2	1508.2	235.87	-2.6716	6.098e-07	1	1.2196e-06	2.0748e-05
GTCCGGGCCTCGATCCGCTG	000040925	Mau2	2408.4	562.75	-2.0956	1.1419e-07	1	2.2837e-07	4.4986e-06
TTCTGGCCGTATTTATCTGG	000018213	Ttk	327.63	13.25	-4.5275	0.00021627	0.99978	0.00043254	0.0034936
AAAATCTGTGCCGATCACAC	000018210	Ttk	266.92	11.925	-4.3736	0.00047257	0.99953	0.00094515	0.0065119
TCATAGGAATCACTGCCACG	000018212	Ttk	476.03	76.848	-2.6153	0.00053776	0.99946	0.0010755	0.0072031
AAAATCTGTGCCGATCACAC	000018210	Ttk	219.71	45.503	-2.2468	0.0079417	0.99206	0.015883	0.055841
GTCCACTTGACATTACCAGA	000001282	Atp6v1b2	281.38	9.2748	-4.7804	0.00027912	0.99972	0.00055825	0.0042866
TCTGGATAGATCCGACACTG	000001283	Atp6v1b2	315.11	22.525	-3.7482	0.00052547	0.99947	0.0010509	0.0070731
AGCCTACAAGACTGTCTCTG	000001281	Atp6v1b2	231.27	17.225	-3.6718	0.0013561	0.99864	0.0027122	0.014684
TGCTGGATTACCACACAACG	000001284	Atp6v1b2	154.18	11.925	-3.5857	0.0034515	0.99655	0.0069031	0.029791
TCCCATTCGAGTATGCAAGT	000047551	Xpo1	232.68	1.8573	-6.3538	0.00010472	0.9999	0.00020945	0.0019323
TAGTCGCATGGCTAAACCAG	000047550	Xpo1	40.472	1.325	-4.1569	0.0061294	0.99387	0.012259	0.046056
GTGACATTGTTGGAGCGAGT	000047549	Xpo1	79.017	5.2999	-3.6669	0.0076001	0.9924	0.0152	0.05406
TCCCATTCGAGTATGCAAGT	000047551	Xpo1	134.91	10.6	-3.5505	0.0044489	0.99555	0.0088979	0.0361
GCCTCCAATGCAGTACATCA	000027781	Med7	619.61	25.174	-4.5675	1.2836e-05	0.99999	2.5672e-05	0.00031941
GAATGATAAGATCATCACAT	000027779	Med7	455.8	22.525	-4.2793	7.7129e-05	0.99992	0.00015426	0.0014995
GCCTCCAATGCAGTACATCA	000027781	Med7	350.93	64.075	-2.4351	0.0019726	0.99803	0.0039453	0.019512
GAATGATAAGATCATCACAT	000027779	Med7	440.95	112.36	-1.9629	0.0024248	0.99758	0.0048495	0.022834
CATCTTCCACAACAGAATGA	000049941	Chaf1b	624.04	14.858	-5.3007	6.1476e-06	0.99999	1.2295e-05	0.00016657
CATCTTCCACAACAGAATGA	000049941	Chaf1b	378.71	22.525	-4.0126	0.00021266	0.99979	0.00042533	0.0034485
AGATGTGTATGATATTTGCT	000049940	Chaf1b	767.46	114.22	-2.7376	4.969e-05	0.99995	9.938e-05	0.0010353
TCACCAGGAAATGTCACTCA	000049943	Chaf1b	546.22	115.15	-2.2361	0.00066301	0.99934	0.001326	0.0084723
GCCGACTTACCGGTAAGCGA	000023899	Eif3d	205.22	2.7859	-5.7674	0.00025462	0.99975	0.00050924	0.0039849
GCCGACTTACCGGTAAGCGA	000023899	Eif3d	208.14	10.6	-4.1723	0.0010825	0.99892	0.0021649	0.012351
CGGATGAGATTCGCACAGGT	000023898	Eif3d	159	18.55	-3.0328	0.0056645	0.99434	0.011329	0.043391
CGGATGAGATTCGCACAGGT	000023898	Eif3d	367.71	59.432	-2.6091	0.0013106	0.99869	0.0026212	0.014318
TGGTTACCTACCTCCACGAG	000074824	Wdr70	488.56	17.225	-4.7475	3.5862e-05	0.99996	7.1724e-05	0.00078239
ACTCGCATGAGATAACACTG	000074821	Wdr70	212.08	7.429	-4.6599	0.00066324	0.99934	0.0013265	0.0084742
ACTCGCATGAGATAACACTG	000074821	Wdr70	194.65	15.9	-3.5332	0.0023127	0.99769	0.0046254	0.022048
AGACCAGTATATCGTAGACA	000074822	Wdr70	238.02	23.85	-3.2658	0.0019216	0.99808	0.0038431	0.01913
GCGCAGCTCCGGATTCAGAA	000018342	Ube2m	2025.5	157.67	-3.6749	2.1111e-09	1	4.2222e-09	1.1388e-07
TTACCCACATGACCCTCCCA	000018344	Ube2m	3692.4	463.38	-2.9915	4.057e-12	1	8.114e-12	3.261e-10
GCGCAGCTCCGGATTCAGAA	000018342	Ube2m	2072	264.66	-2.9641	1.1052e-08	1	2.2104e-08	5.2238e-07
TTCCAGGGCTTCTACAAAAG	000018345	Ube2m	1578.4	251.66	-2.6441	4.5381e-07	1	9.0762e-07	1.5908e-05
GCATACTTACAACAACCGAG	000020329	Psma6	232.23	3.9749	-5.551	0.00023545	0.99976	0.00047089	0.0037445
ACAGCAGATCCCAGGTACAG	000020327	Psma6	397.46	8.3576	-5.4122	4.7763e-05	0.99995	9.5526e-05	0.0010004
CAACAGATGTAAGTCCACCC	000020328	Psma6	366.18	24.144	-3.8682	0.00027907	0.99972	0.00055814	0.004286
AAGCCACAGTAGTAACCTGC	000020326	Psma6	157.07	10.6	-3.7684	0.0028088	0.99719	0.0056176	0.025515
CGGCCGAGCTCTGGAAGCGC	000046377	Hist1h3g	65.608	0	-6.0576	0.0017488	0.99825	0.0034975	0.017806
GCCGCCGGTAGACTTGCGAG	000046378	Hist1h3g	255.36	7.9498	-4.8402	0.00035003	0.99965	0.00070005	0.0051359
CCGCTACCGTCCCGGCACTG	000046376	Hist1h3g	91.545	2.6499	-4.6642	0.0025266	0.99747	0.0050532	0.023567
CGGCCGAGCTCTGGAAGCGC	000046377	Hist1h3g	45.29	1.325	-4.3154	0.0050595	0.99494	0.010119	0.039838
CAAGAGATGAGTTAGAGAGG	000011514	Nf2	306.43	9.2748	-4.9031	0.00019158	0.99981	0.00038317	0.0031679
GACCCCTCTGTGCACAAGCG	000011515	Nf2	863.41	29.149	-4.8415	1.2197e-06	1	2.4394e-06	3.887e-05
TGTGAACTACTTTACAATCC	000011517	Nf2	1041.7	70.224	-3.8718	9.6115e-07	1	1.9223e-06	3.1374e-05
CAAGAGATGAGTTAGAGAGG	000011514	Nf2	485.19	58.503	-3.0305	0.00026035	0.99974	0.0005207	0.0040586
ACCGCAAGCTCATCACCCTG	000016930	Med22	612.87	30.474	-4.2857	1.8235e-05	0.99998	3.6469e-05	0.00043505
ACCGCAAGCTCATCACCCTG	000016930	Med22	878.84	61.289	-3.8202	3.5451e-06	1	7.0902e-06	0.00010174
TCACAGACGGGAAGTCGTTG	000016933	Med22	730.08	134.65	-2.4301	0.00012529	0.99987	0.00025059	0.0022406
CAGGTGTCTCGGGCTACTCA	000016931	Med22	543.17	144.87	-1.8994	0.0014765	0.99852	0.0029529	0.015665
CTGCCTCAATATCTGCGTCG	000029760	Rpl11	51.072	0	-5.7024	0.0028273	0.99717	0.0056547	0.025631
CTCACCTTTGGAGAACACCG	000029759	Rpl11	46.536	0	-5.5709	0.0033392	0.99666	0.0066783	0.029055
GGGAAAAGGAGAACCCCATG	000029761	Rpl11	81.908	1.325	-5.1562	0.0015746	0.99843	0.0031493	0.01645
AATTCAAGAACACATTGACC	000029758	Rpl11	117.56	3.9749	-4.5748	0.0020898	0.99791	0.0041796	0.020393
AGCTAGGCAGAGAGAACCGT	000059932	Rnf40	842.21	38.424	-4.4187	2.2726e-06	1	4.5451e-06	6.812e-05
GAGATGCCCAGCGATACAAG	000059934	Rnf40	408.58	22.525	-4.1219	0.00014221	0.99986	0.00028443	0.0024887
GGAGGTCGTTCGTGAGACAG	000059935	Rnf40	444.23	25.174	-4.0883	0.00010458	0.9999	0.00020916	0.0019303
GGAGGTCGTTCGTGAGACAG	000059935	Rnf40	226.58	34.359	-2.6862	0.0041952	0.9958	0.0083905	0.034541
GCCAGCAAGATTGAGACCCG	000025332	Med20	759.34	21.2	-5.098	2.2642e-06	1	4.5284e-06	6.7908e-05
AGAGGGCAAAGCAGCTCAGT	000025330	Med20	415.32	13.25	-4.8687	6.512e-05	0.99993	0.00013024	0.0013018
AGGTGGGCACGGTCACAATG	000025331	Med20	775.09	61.289	-3.6392	1.0256e-05	0.99999	2.0511e-05	0.00026131
AGAGGGCAAAGCAGCTCAGT	000025330	Med20	350.93	31.573	-3.4335	0.00051961	0.99948	0.0010392	0.0070112
ACACCAAAGAATGCCTGGAG	000021322	Med10	369.07	9.2748	-5.1706	7.8857e-05	0.99992	0.00015771	0.0015278
AGAAGTTCGTGGAGAACATT	000021324	Med10	1740.9	208.94	-3.0526	5.2365e-08	1	1.0473e-07	2.1943e-06
ACACCAAAGAATGCCTGGAG	000021322	Med10	320.41	48.289	-2.7051	0.0017186	0.99828	0.0034372	0.017573
ACAGCAGCTGCACGATATCA	000021323	Med10	1965.2	403.95	-2.2796	2.8234e-07	1	5.6468e-07	1.0296e-05
TTGTTGACAAGGTTCAACCA	000010464	Mcm4	360.4	7.9498	-5.3356	7.4368e-05	0.99993	0.00014874	0.0014554
ACCCGGGTGGAGATAGATCG	000010461	Mcm4	365.42	12.072	-4.8089	0.00011336	0.99989	0.00022673	0.0020633
GGTTATACCAACCTTTGACA	000010463	Mcm4	285.23	18.55	-3.872	0.0006292	0.99937	0.0012584	0.0081393
ACCCGGGTGGAGATAGATCG	000010461	Mcm4	198.51	17.225	-3.4525	0.0024035	0.9976	0.0048069	0.022684
TGCATATGCCCGTATAGAAG	000078429	Rpl5	50.109	0	-5.6755	0.0029268	0.99707	0.0058536	0.026297
TGCATATGCCCGTATAGAAG	000078429	Rpl5	34.33	0	-5.1428	0.0055337	0.99447	0.011067	0.042631
ATATTATATACATACCCTGC	000078427	Rpl5	458.69	13.25	-5.0116	3.7403e-05	0.99996	7.4805e-05	0.00081259
ATACTATCTATTACCTATGA	000078426	Rpl5	237.05	11.925	-4.2031	0.00076495	0.99924	0.0015299	0.0094458
CCAATGCTGGTGTAGATACG	000012927	Phb	226.45	3.9749	-5.5147	0.00025916	0.99974	0.00051833	0.0040427
CCAATGCTGGTGTAGATACG	000012927	Phb	214.37	4.6431	-5.2542	0.00037638	0.99962	0.00075275	0.0054423
GTGATGACTGGTACGTTCCG	000012928	Phb	293.71	8.3576	-4.977	0.00020507	0.99979	0.00041014	0.0033495
CACTCACCACCACCGACTTG	000012926	Phb	391.23	18.55	-4.3265	0.0001376	0.99986	0.00027519	0.0024213
CTGGATAAAGAACAAAACCT	000031348	Polr2g	123.34	1.325	-5.741	0.00057415	0.99943	0.0011483	0.007579
AGCACCAATATTGTCGATGG	000031346	Polr2g	465.43	9.2748	-5.5045	2.2541e-05	0.99998	4.5082e-05	0.00052309
AGTTTGGACCGAAGTATCGT	000031347	Polr2g	308.97	16.715	-4.1291	0.00038241	0.99962	0.00076482	0.0055121
CTGGATAAAGAACAAAACCT	000031348	Polr2g	23.649	1.8573	-3.1089	0.019889	0.98011	0.039779	0.11141
GAAATATAACTAACCTCCGG	000039099	Pmpcb	244.12	7.429	-4.862	0.00038789	0.99961	0.00077579	0.0055758
GAAATATAACTAACCTCCGG	000039099	Pmpcb	159.96	9.2748	-3.9695	0.002252	0.99775	0.004504	0.021598
GGACCGACTAAGAAGCACAC	000039101	Pmpcb	432.55	44.574	-3.2499	0.00030474	0.9997	0.00060948	0.0046003
GAGACAGATCGTGTCTGGAT	000039100	Pmpcb	55.89	7.9498	-2.6682	0.025241	0.97476	0.050483	0.1329
TCTGGGTTGGTATACCACAG	000020517	Cops6	421.1	19.875	-4.3378	0.00010157	0.9999	0.00020314	0.0018856
AGAATATTATTACACCAAGG	000020515	Cops6	317.03	23.85	-3.6779	0.0005546	0.99945	0.0011092	0.0073754
AGAATATTATTACACCAAGG	000020515	Cops6	305.15	27.859	-3.4072	0.00083602	0.99916	0.001672	0.010122
GAGCTCAGCAAACAGCATTG	000020516	Cops6	679.73	134.65	-2.3272	0.00022163	0.99978	0.00044326	0.0035626
GTTCCTGGAATGTGGACCAG	000047175	Grwd1	122.82	2.7859	-5.0315	0.0012646	0.99874	0.0025292	0.013921
CGCACGATGGTACAGCACGT	000047172	Grwd1	285.23	7.9498	-4.9992	0.00021999	0.99978	0.00043998	0.0035415
GCCATGGTTCCTCACTACGG	000047174	Grwd1	339.2	13.25	-4.5774	0.0001833	0.99982	0.00036661	0.0030574
GATGTCCCAGATGCGAATAG	000047173	Grwd1	327.63	13.25	-4.5275	0.00021627	0.99978	0.00043254	0.0034936
CCAAGACCCCTCATACCAAG	000045090	Kat5	165.55	2.7859	-5.4591	0.00052523	0.99947	0.0010505	0.007071
CAGGTAGAGGACGGGTAGCG	000045089	Kat5	245.72	5.2999	-5.2914	0.00025856	0.99974	0.00051713	0.0040351
ATGAATGGGTGACTCACGAG	000045088	Kat5	185.38	6.5004	-4.6351	0.00091541	0.99908	0.0018308	0.010869
GCCACGACGACATTGTCACC	000045091	Kat5	433.63	33.124	-3.6709	0.00018159	0.99982	0.00036317	0.0030349
GTAGCCAAGTATGCACCCAG	000018836	Wdr1	723.98	22.287	-4.9603	3.4985e-06	1	6.997e-06	0.00010057
GTGTGCGATTCTCTCCTGAT	000018837	Wdr1	953.03	66.249	-3.8265	1.9909e-06	1	3.9817e-06	6.0441e-05
ATGGCTCCCAGAATAGATGT	000018834	Wdr1	1387.6	250.42	-2.4655	2.3185e-06	1	4.6371e-06	6.9354e-05
GGCCCTACCGACTAGCAACA	000018835	Wdr1	675.15	151.37	-2.1498	0.00035125	0.99965	0.00070249	0.00515
CACTAACCGGAATAACCCGG	000014967	Polr2c	135.03	4.6431	-4.5913	0.0016897	0.99831	0.0033794	0.01735
AATGACTATGTGGAGCAGGA	000014966	Polr2c	257.29	10.6	-4.4768	0.00047673	0.99952	0.00095345	0.0065566
CCAAGTGGAACCCTACTGCG	000014968	Polr2c	172.49	7.9498	-4.2768	0.0014699	0.99853	0.0029399	0.015618
TCTTCACATGTGCAGTCCTG	000014969	Polr2c	197.54	9.2748	-4.2723	0.0011114	0.99889	0.0022228	0.012604
ATGGCTGTGCAGTTTAATGG	000013867	Psmb6	316.6	7.429	-5.2357	0.00012782	0.99987	0.00025565	0.002276
ATGGCTGTGCAGTTTAATGG	000013867	Psmb6	344.98	10.6	-4.8985	0.00012881	0.99987	0.00025761	0.0022907
TCTTACCATCATACCCCCCA	000013869	Psmb6	875.94	49.024	-4.1318	2.424e-06	1	4.848e-06	7.2195e-05
TCTTACCATCATACCCCCCA	000013869	Psmb6	891.81	243.3	-1.8697	0.00024028	0.99976	0.00048056	0.0038069
GACCGTGAACTGGACCTCCG	000033745	Snrpa1	119.49	1.325	-5.6956	0.0006255	0.99937	0.001251	0.008101
CCTCACCAACAACAGTCTAG	000033744	Snrpa1	192.73	11.925	-3.9058	0.0016494	0.99835	0.0032988	0.017036
AAGTCCAGTACTCTGACTTG	000033743	Snrpa1	336.31	38.424	-3.0969	0.00089044	0.99911	0.0017809	0.010632
AAAATGTTCAAGGGCAAACG	000033742	Snrpa1	36.618	3.9749	-2.9187	0.023685	0.97631	0.047371	0.12682
AATGTGTTCCAAGTTTACGA	000041218	Naa15	1187.2	160.32	-2.8807	2.254e-06	1	4.508e-06	6.7646e-05
ATTCAAATGCGAGATCTTGA	000041219	Naa15	706.34	125.87	-2.479	0.0001314	0.99987	0.00026281	0.0023309
AATGTGTTCCAAGTTTACGA	000041218	Naa15	1126.8	237.73	-2.24	2.0159e-05	0.99998	4.0318e-05	0.0004744
GCTTATGAATTGGTTCGCAG	000041221	Naa15	742.96	190.8	-1.9556	0.0004008	0.9996	0.0008016	0.005722
AAGATCTGGAGGTCTTGTCG	000030599	Med4	434.6	7.9498	-5.605	2.7863e-05	0.99997	5.5726e-05	0.00062831
AAGATCTGGAGGTCTTGTCG	000030599	Med4	268.53	10.215	-4.587	0.00038181	0.99962	0.00076361	0.0055048
TCAACTCACCAGGATCTGCT	000030601	Med4	1011.8	56.974	-4.1268	8.5048e-07	1	1.701e-06	2.8067e-05
TCAACTCACCAGGATCTGCT	000030601	Med4	1208.4	230.3	-2.3865	7.9994e-06	0.99999	1.5999e-05	0.00021001
CCTTTACTTAGGTACGTACG	000046346	Qars	324.74	10.6	-4.8116	0.0001718	0.99983	0.0003436	0.0029017
TGAAACGGTACCGTTCCGCT	000046347	Qars	22.124	0	-4.5313	0.010522	0.98948	0.021045	0.069072
AGCCAATAAGAAGATTCACA	000046345	Qars	262.11	10.6	-4.5035	0.00044162	0.99956	0.00088325	0.0061684
TGAAACGGTACCGTTCCGCT	000046347	Qars	72.272	3.9749	-3.8805	0.0066755	0.99332	0.013351	0.049013
GATGGATCGAGTGCTTCGAG	000002332	Cct4	170.56	3.9749	-5.1079	0.00069889	0.9993	0.0013978	0.0088127
CTCTCCAATGAGTGTCAATG	000002331	Cct4	415.32	15.9	-4.6226	8.1794e-05	0.99992	0.00016359	0.0015763
CCGCTTCAGCAATATTTCCG	000002330	Cct4	260.18	11.925	-4.3368	0.00052572	0.99947	0.0010514	0.0070753
AGCAATGATGACAACCGACG	000002329	Cct4	126.24	10.6	-3.4553	0.0053805	0.99462	0.010761	0.041741
TACCAGTAAACGACATCCAG	000044251	Srbd1	440.18	13.001	-4.9778	4.6175e-05	0.99995	9.2351e-05	0.00097256
CAGATTCTGGCCATTAACCG	000044249	Srbd1	577.5	20.43	-4.7546	1.5593e-05	0.99998	3.1187e-05	0.00037855
CAGATTCTGGCCATTAACCG	000044249	Srbd1	442.3	21.2	-4.3197	8.4269e-05	0.99992	0.00016854	0.0016157
GGCTTTATAGAACAGCCCGG	000044250	Srbd1	24.091	2.6499	-2.7812	0.028483	0.97152	0.056966	0.1453
GCTGCCAGCAAACTGCCACT	000013875	Psmc1	241.87	9.2748	-4.563	0.00052114	0.99948	0.0010423	0.0070284
GATCCTTGTCTACAAACGAC	000013874	Psmc1	166.71	13.25	-3.5569	0.0030803	0.99692	0.0061606	0.02734
GGAGGAATTCATTAGAAACC	000013876	Psmc1	284.27	35.774	-2.9556	0.0017326	0.99827	0.0034652	0.017688
TACCCATCCTGAGTATTACG	000013877	Psmc1	489.01	84.505	-2.5187	0.00057553	0.99942	0.0011511	0.0075932
GGTGGGGAACGTGTATGTCA	000048982	U2af1	232.23	7.9498	-4.7038	0.00050984	0.99949	0.0010197	0.0069028
ACACAAACCTGGCTAAAGGT	000048981	U2af1	163.82	6.6249	-4.434	0.0014057	0.99859	0.0028113	0.015087
TGCAGGTGCTGTGAGCGACG	000048983	U2af1	152.25	7.9498	-4.0979	0.0021854	0.99781	0.0043708	0.021097
ACACAAACCTGGCTAAAGGT	000048981	U2af1	227.34	30.645	-2.8511	0.0034141	0.99659	0.0068283	0.02954
GGGGTCAGGAGGGAAAGGAA	000008092	Hspe1	148.4	1.325	-6.0058	0.0003388	0.99966	0.0006776	0.0050091
GCCGAAACTGTAACCAAAGG	000008091	Hspe1	131.98	2.7859	-5.1344	0.0010359	0.99896	0.0020719	0.011947
GCCGAAACTGTAACCAAAGG	000008091	Hspe1	164.78	3.9749	-5.0585	0.00078067	0.99922	0.0015613	0.0095923
ACCAATACTCTGTCAAAGAG	000008090	Hspe1	337.96	18.573	-4.1142	0.00028842	0.99971	0.00057684	0.0044004
CAGCACCTGCCGATCTCCCG	000018551	Urod	436.37	8.3576	-5.5466	2.8832e-05	0.99997	5.7665e-05	0.00064631
CCATCACCCTTACTCGACAA	000018552	Urod	665.23	48.289	-3.7567	2.1429e-05	0.99998	4.2858e-05	0.00050076
CAGCACCTGCCGATCTCCCG	000018551	Urod	311.25	55.649	-2.4626	0.0026352	0.99736	0.0052705	0.02431
GTGGACCCTAATGACATACA	000018553	Urod	816.19	159	-2.3526	8.7205e-05	0.99991	0.00017441	0.0016635
AAATCACTGACACCAACGTG	000058820	Polr2b	366.95	8.3576	-5.2972	7.198e-05	0.99993	0.00014396	0.0014163
TAGGAGAGTTTAGACGACGC	000058823	Polr2b	61.794	0.92863	-5.025	0.0019707	0.99803	0.0039415	0.019496
TAGGAGAGTTTAGACGACGC	000058823	Polr2b	39.509	1.325	-4.1229	0.00638	0.99362	0.01276	0.047431
AAATCACTGACACCAACGTG	000058820	Polr2b	138.76	7.9498	-3.965	0.0028878	0.99711	0.0057755	0.026036
GATGTGACTATAACAAACGA	000002336	Cct5	77.814	0.92863	-5.3528	0.0012225	0.99878	0.0024451	0.013564
CGTGAATGCCGTCCTCACGG	000002335	Cct5	227.42	9.2748	-4.4745	0.00066218	0.99934	0.0013244	0.008464
GATGTGACTATAACAAACGA	000002336	Cct5	26.982	1.325	-3.5892	0.011524	0.98848	0.023048	0.073906
CAGGAGGACGGATTGTCCCA	000002334	Cct5	175.38	14.575	-3.5014	0.0029512	0.99705	0.0059024	0.026454
AGCTAGACATACACCCTCTG	000020323	Psma5	478.33	13.001	-5.0974	2.8633e-05	0.99997	5.7266e-05	0.00064256
GGAAATGGTACTTACAGTTG	000020324	Psma5	72.474	1.8573	-4.6845	0.0029226	0.99708	0.0058452	0.026269
AGCTAGACATACACCCTCTG	000020323	Psma5	421.1	22.525	-4.1654	0.00012057	0.99988	0.00024115	0.0021721
TTGCAGGTTGTGCCATGAGT	000020325	Psma5	431.03	26.93	-3.9512	0.00013684	0.99986	0.00027368	0.0024114
GGAAATCGGTCCTGTCCCGC	000069161	Ifnz	111.78	2.6499	-4.9495	0.0015405	0.99846	0.003081	0.016185
GGAAATCGGTCCTGTCCCGC	000069161	Ifnz	90.02	3.7145	-4.271	0.0037887	0.99621	0.0075775	0.031963
TTCCCATGTCCCTGGAAGGA	000069163	Ifnz	404.72	22.525	-4.1083	0.00014969	0.99985	0.00029937	0.0025928
TAAATCTGGGAGCCTGCACC	000069162	Ifnz	153.22	17.225	-3.081	0.00574	0.99426	0.01148	0.043838
GGGTCACCACAACTAGGATG	000028540	Psmg3	571.4	31.573	-4.1353	3.095e-05	0.99997	6.1901e-05	0.00068824
CGTACCCATCTTCCCGAACT	000028538	Psmg3	1515.8	195.01	-2.9521	2.5524e-07	1	5.1048e-07	9.3781e-06
CTGCCCGAGGAGGACTCTCG	000028539	Psmg3	597.34	97.506	-2.6027	0.00021927	0.99978	0.00043854	0.0035316
GGTGTGCGGTGTGCCCACCC	000028541	Psmg3	309.32	54.324	-2.4878	0.002581	0.99742	0.0051621	0.023937
TGTCATTTAGCCGTTCCAGG	000047583	Tubg1	427.85	14.575	-4.7832	6.2278e-05	0.99994	0.00012456	0.0012525
CATGAGAAAGTGGAGCCGAG	000047580	Tubg1	286.08	13.001	-4.3579	0.00039102	0.99961	0.00078204	0.0056123
CGTAGAAGAGTTCGCCACGG	000047582	Tubg1	233.2	26.499	-3.0903	0.0024475	0.99755	0.004895	0.023001
TGTCATTTAGCCGTTCCAGG	000047583	Tubg1	254.04	61.289	-2.0337	0.0081821	0.99182	0.016364	0.057108
CCGGATCTCGCGCAGCGCCA	000069180	Hist1h3h	442.3	15.9	-4.7132	5.7726e-05	0.99994	0.00011545	0.001173
GTGCCGGGACGGTAGCGGTG	000069183	Hist1h3h	43.484	0.92863	-4.5277	0.0037559	0.99624	0.0075117	0.031759
GTGCCGGGACGGTAGCGGTG	000069183	Hist1h3h	21.2	0	-4.4725	0.011149	0.98885	0.022298	0.072071
GGTGGCCAGCTGCTTGCGCG	000069182	Hist1h3h	155.14	7.9498	-4.1249	0.002062	0.99794	0.0041239	0.02018
GATGACTATCCTTGCATCAG	000020332	Psma7	181.16	1.325	-6.2919	0.00018054	0.99982	0.00036108	0.0030216
CTTCCAAGTGGAGTACGCGC	000020331	Psma7	179.23	19.875	-3.1101	0.0042036	0.9958	0.0084072	0.034595
GATGACTATCCTTGCATCAG	000020332	Psma7	193.77	48.289	-1.9825	0.014422	0.98558	0.028843	0.087506
GGGCACATACCATGCTTGGA	000020333	Psma7	321.85	109.97	-1.5407	0.012729	0.98727	0.025457	0.079653
CTAGCACACCAACACGTCGT	000013271	Plk1	170.89	0	-7.4253	0.0001519	0.99985	0.00030379	0.0026229
CCACTAGCAAGGTATACCTG	000013270	Plk1	185.98	3.9749	-5.2321	0.00052462	0.99948	0.0010492	0.0070658
GCTGGCGAAAGAAATTCCGG	000013273	Plk1	153.22	9.2748	-3.9078	0.002577	0.99742	0.005154	0.023906
GCTGGCGAAAGAAATTCCGG	000013273	Plk1	244.89	26.002	-3.1869	0.0019523	0.99805	0.0039046	0.019365
CCAGGAAGCCTAACACGAGG	000012332	Orc1	250.54	13.25	-4.1418	0.00069989	0.9993	0.0013998	0.0088232
GGAATTCCTGCTCTCGACAG	000012333	Orc1	238.02	17.225	-3.7131	0.0012111	0.99879	0.0024221	0.013469
AACAAGAAGATAGTCCTGAG	000012330	Orc1	713.08	124.55	-2.5079	0.00011779	0.99988	0.00023558	0.00213
ACAGTTTGTATTGATTCAGG	000012331	Orc1	645.63	135.15	-2.2478	0.00033347	0.99967	0.00066694	0.0049464
ACATCATCGAAAATTAAGGA	000021678	Gnl3	252.47	10.6	-4.4496	0.00051494	0.99949	0.0010299	0.0069604
TGAGGAACTAAGACCGCTGG	000021681	Gnl3	223.56	13.25	-3.9781	0.0010953	0.9989	0.0021906	0.012465
GAATAAAGAATTGCCAACCG	000021679	Gnl3	45.29	7.9498	-2.3708	0.037358	0.96264	0.074717	0.17737
GAATAAAGAATTGCCAACCG	000021679	Gnl3	108.33	27.859	-1.9216	0.032755	0.96724	0.06551	0.16101
GGTGTGGGCCAGCAATCTTG	000033953	Cnot8	389.31	18.55	-4.3194	0.00014121	0.99986	0.00028243	0.0024742
GCAGTTCCAGAAACACGAGG	000033952	Cnot8	424.96	26.499	-3.9532	0.00014465	0.99986	0.0002893	0.0025224
GAGCTTCGAAATTCACCGAT	000033951	Cnot8	633.19	45.503	-3.7695	2.7607e-05	0.99997	5.5214e-05	0.00062355
GCAGTTCCAGAAACACGAGG	000033952	Cnot8	226.58	16.715	-3.6833	0.0014101	0.99859	0.0028201	0.015122
GATACGAGTGTACACACACG	000002547	Cdk1	185.38	3.7145	-5.305	0.00049291	0.99951	0.00098581	0.0067265
GAAGATCAGACTTGAAAGCG	000002546	Cdk1	153.22	3.9749	-4.9541	0.00097954	0.99902	0.0019591	0.011449
GATACGAGTGTACACACACG	000002547	Cdk1	55.89	1.325	-4.6129	0.0034539	0.99655	0.0069077	0.029805
TCTTTCAGGTACTTACGGTG	000002548	Cdk1	38.545	1.325	-4.0882	0.006645	0.99335	0.01329	0.048852
CAGGCGTCTAGGGATCATCG	000055513	Mylip	836.12	87.291	-3.2451	1.1746e-05	0.99999	2.3491e-05	0.00029505
ACTTGACCCTCAGTTTAAGG	000055512	Mylip	930.86	111.3	-3.0528	8.4248e-06	0.99999	1.685e-05	0.00021977
CTTCAGGTCCGACCCCAATG	000055514	Mylip	1035.2	158.79	-2.6971	9.2267e-06	0.99999	1.8453e-05	0.00023832
GCGACTGTACTGCATCATGA	000055515	Mylip	1333.5	249.8	-2.4117	3.7216e-06	1	7.4432e-06	0.00010628
AACAAATGGGAAGCCTACCT	000028494	Polr2l	263.96	4.6431	-5.5531	0.00016744	0.99983	0.00033487	0.0028434
GAAGATCGTCGGCAACAAAT	000028495	Polr2l	641.78	15.9	-5.2492	5.4935e-06	0.99999	1.0987e-05	0.00015074
TGCAGGCCGAGTACACGGAG	000028497	Polr2l	113.71	6.6249	-3.9111	0.0040613	0.99594	0.0081226	0.033718
GTTGCCGACGATCTTCCCGC	000028496	Polr2l	48.825	3.7145	-3.4017	0.01338	0.98662	0.026761	0.082669
GGAACAGAGACAATCGAGCA	000042372	Ncapg2	232.23	6.6249	-4.9349	0.00041372	0.99959	0.00082743	0.0058588
AAAAACAGAACACCGAACAT	000042370	Ncapg2	376.78	11.925	-4.8693	9.5645e-05	0.9999	0.00019129	0.0017967
CACCAACAGAAAGTCCGTCA	000042371	Ncapg2	223.56	19.875	-3.4273	0.0018852	0.99811	0.0037705	0.018864
AAAAACAGAACACCGAACAT	000042370	Ncapg2	183.09	35.288	-2.3429	0.0097447	0.99026	0.019489	0.065208
TGACCGTGTTGCAATCCATG	000010467	Mcm5	679.36	13.25	-5.5773	2.9252e-06	1	5.8503e-06	8.5704e-05
TGATGAAGTATGGATCCAGT	000010468	Mcm5	112.74	2.6499	-4.9618	0.0015065	0.99849	0.0030129	0.015905
TGACCGTGTTGCAATCCATG	000010467	Mcm5	265.48	9.2863	-4.6953	0.00035759	0.99964	0.00071518	0.0052249
TCAGCAAGTTGATATCACCT	000010466	Mcm5	293.91	26.499	-3.4228	0.00091903	0.99908	0.0018381	0.010903
TCATGGTTTAGGTAATATCG	000002348	Cct8	222.6	9.2748	-4.4437	0.00071829	0.99928	0.0014366	0.0090051
CCTTCACCTGAGCATCCATG	000002347	Cct8	292.94	15.9	-4.1205	0.00045544	0.99954	0.00091089	0.0063255
CCTTCACCTGAGCATCCATG	000002347	Cct8	345.59	36.216	-3.2192	0.00070287	0.9993	0.0014057	0.0088544
TCATGGTTTAGGTAATATCG	000002348	Cct8	357.03	135.58	-1.3903	0.01472	0.98528	0.029439	0.08884
AGACGTGTATTCTTACGACG	000018418	Usp5	0.76288	34.359	4.3261	1	2.4587e-67	4.9174e-67	4.0851e-64
ATGGATGCAGCCCTTAACAA	000018419	Usp5	981.94	60.949	-3.9879	1.2809e-06	1	2.5617e-06	4.066e-05
AGACGTGTATTCTTACGACG	000018418	Usp5	44.327	2.6499	-3.6344	0.01096	0.98904	0.02192	0.071182
TTTGTAGGCTACATACACCT	000018421	Usp5	852.9	126.29	-2.7459	2.7113e-05	0.99997	5.4225e-05	0.00061392
TGTGTCACTGACTCACCTGT	000078568	LOC100861615	152.25	1.325	-6.0426	0.00031362	0.99969	0.00062724	0.0047068
GGAAGAAAAGAGGTTCTGTG	000078567	LOC100861615	115.2	1.8573	-5.3458	0.00097878	0.99902	0.0019576	0.011442
AGTGCCAAGGAACAGCAGGT	000078566	LOC100861615	28.227	0.92863	-3.9216	0.0074515	0.99255	0.014903	0.053269
TGTGTCACTGACTCACCTGT	000078568	LOC100861615	62.556	4.6431	-3.4935	0.010715	0.98928	0.02143	0.070029
CATGTCCAAGGAATACTGCG	000032099	Snrpg	110.82	1.325	-5.5878	0.00076241	0.99924	0.0015248	0.0094202
CTTACAGTGAAGTTAAACGG	000032100	Snrpg	44.327	1.325	-4.2851	0.0052518	0.99475	0.010504	0.040982
ACTCACTTCTTCAGCTCGGG	000032098	Snrpg	290.05	18.55	-3.8961	0.00058438	0.99942	0.0011688	0.0076841
CATGTCCAAGGAATACTGCG	000032099	Snrpg	92.309	5.5718	-3.8277	0.0056212	0.99438	0.011242	0.043135
CTTGTCGTGGAACCGGACGA	000015632	Srsf2	221.24	3.7145	-5.5588	0.00026295	0.99974	0.0005259	0.0040897
CTTGTCGTGGAACCGGACGA	000015632	Srsf2	193.69	6.6249	-4.6743	0.00080435	0.9992	0.0016087	0.0098277
GAGACTTGGAGCGGCTGTAG	000015633	Srsf2	397.01	30.474	-3.6606	0.0002591	0.99974	0.0005182	0.0040421
CGGCGACGTGTACATTCCGC	000015631	Srsf2	121.42	11.925	-3.2436	0.0069671	0.99303	0.013934	0.050636
AAGCAAGGTTCAGCAACAGT	000020314	Psma1	378.39	26.002	-3.8126	0.00026265	0.99974	0.0005253	0.004086
AAGCAAGGTTCAGCAACAGT	000020314	Psma1	211.03	15.9	-3.6492	0.0017251	0.99827	0.0034502	0.017628
CCATATTGGTATCTCAATTG	000020315	Psma1	198.51	18.55	-3.3512	0.0026631	0.99734	0.0053262	0.024508
GACAGGTTTGGAAAATATGA	000020316	Psma1	466.88	58.503	-2.9751	0.00032925	0.99967	0.0006585	0.0048968
ACGCGACACCCTGTACGAGG	000014875	Rpl10a	126.24	1.325	-5.7741	0.00053889	0.99946	0.0010778	0.0072152
CTGCTTAATCAGAGACTCAG	000014876	Rpl10a	1.5258	50.146	4.3398	1	3.9535e-59	7.9071e-59	5.4549e-56
GGCCGTGGATATCCCCCACA	000014877	Rpl10a	122.38	5.2999	-4.2916	0.002581	0.99742	0.005162	0.023937
CTGCTTAATCAGAGACTCAG	000014876	Rpl10a	58.781	2.6499	-4.0337	0.0065241	0.99348	0.013048	0.048194
CGTTGACCCCAATGACCAGG	000013884	Psmc3	286.2	19.875	-3.7822	0.0006816	0.99932	0.0013632	0.0086534
GATCAAAACTTCTACCCGAC	000013885	Psmc3	230.31	15.9	-3.7747	0.0012381	0.99876	0.0024761	0.0137
ACAGCAAGATGGCATTGGGG	000013882	Psmc3	173.45	13.25	-3.6138	0.0027033	0.9973	0.0054066	0.02479
ACAGCAAGATGGCATTGGGG	000013882	Psmc3	353.98	33.431	-3.366	0.00054556	0.99945	0.0010911	0.0072853
CAAGCATGTCCACATAACCG	000013858	Psmb4	83.836	1.325	-5.1894	0.0014945	0.99851	0.0029891	0.015811
GATATTGCGGAAACGAGCCA	000013859	Psmb4	343.05	10.6	-4.8905	0.00013235	0.99987	0.00026469	0.0023448
GCGCCGACGCCGGGTCCATG	000013860	Psmb4	434.6	15.9	-4.6879	6.3711e-05	0.99994	0.00012742	0.0012772
GGTGAAGTTCGACGGCGGAG	000013861	Psmb4	183.09	43.645	-2.0438	0.014474	0.98553	0.028949	0.087742
GCTGTGGATAATTAATAACC	000060567	Dnajc13	175.38	5.2999	-4.8072	0.00087569	0.99912	0.0017514	0.010491
ATGCACTGGAGGGATAGGAT	000060565	Dnajc13	386.41	27.824	-3.7485	0.00026034	0.99974	0.00052067	0.0040586
ATCGCAGTGTGTAAGTGTCG	000060564	Dnajc13	504.27	128.15	-1.968	0.0015919	0.99841	0.0031838	0.016591
GCTGTGGATAATTAATAACC	000060567	Dnajc13	100.7	26.93	-1.8644	0.037549	0.96245	0.075098	0.17802
TCCTCGCCGCCTACGACCTG	000038808	Tbcc	964.28	25.073	-5.2103	3.7369e-07	1	7.4739e-07	1.332e-05
TTCTCCACCGGTGACCAAGG	000038809	Tbcc	401.28	15.787	-4.5828	9.7534e-05	0.9999	0.00019507	0.0018252
CACCAGGCTCAGGTCCCGCG	000038807	Tbcc	535.54	99.363	-2.4185	0.00049143	0.99951	0.00098287	0.0067109
TTCTCCACCGGTGACCAAGG	000038809	Tbcc	615.76	131.17	-2.2223	0.00042995	0.99957	0.0008599	0.0060437
TACTCGGAGCGCGTGGGCGC	000069243	Hist1h2ag	119.01	0	-6.907	0.00043892	0.99956	0.00087784	0.0061391
CCGCGTTGCCCGCCAGCTCC	000069240	Hist1h2ag	158.68	0.92863	-6.3715	0.00019195	0.99981	0.00038391	0.0031726
CCGCGTTGCCCGCCAGCTCC	000069240	Hist1h2ag	79.017	3.9749	-4.0076	0.0054982	0.9945	0.010996	0.042425
GCGCGTGGGCGCCGGCGCCC	000069242	Hist1h2ag	106	6.6249	-3.8107	0.0048761	0.99512	0.0097522	0.038705
TGAAGGCTGTGGAAAACAGT	000013849	Psma3	138.76	0	-7.1268	0.00028663	0.99971	0.00057326	0.004379
CCAGCATCTTGCAGACAGAG	000013846	Psma3	188.87	7.9498	-4.407	0.0010833	0.99892	0.0021667	0.012359
CTCACATATGAAACACCTGA	000013847	Psma3	468.41	82.648	-2.4885	0.00071107	0.99929	0.0014221	0.0089325
TCCATCAGGAGAGAACGTAG	000013848	Psma3	151.81	56.646	-1.4065	0.046927	0.95307	0.093854	0.2089
TAGGAGAGGAGTTGCCCCCG	000030180	Rplp2	81.628	2.7859	-4.4479	0.0034704	0.99653	0.0069408	0.029911
TTCAGCTCACTGATGACCTG	000030181	Rplp2	108.89	5.2999	-4.1246	0.0035213	0.99648	0.0070426	0.03024
TAGGAGAGGAGTTGCCCCCG	000030180	Rplp2	37.581	1.325	-4.0526	0.0069256	0.99307	0.013851	0.050408
GCTGAATGGAAAGAACATTG	000030179	Rplp2	79.017	3.9749	-4.0076	0.0054982	0.9945	0.010996	0.042425
GAGTCAGGACTCTCCGAAGT	000054703	Mars	367.14	9.2748	-5.1631	8.0961e-05	0.99992	0.00016192	0.0015622
CGAACGATATGCCGAACCAG	000054702	Mars	243.8	9.2748	-4.5744	0.000505	0.99949	0.00101	0.0068501
AGCAATGATGTGCTTGACCA	000054700	Mars	267.89	13.25	-4.238	0.00053076	0.99947	0.0010615	0.0071267
ATCACCAGAGACCTCAAATG	000054701	Mars	129.13	6.6249	-4.0931	0.002869	0.99713	0.005738	0.025909
GTTGACGTCTGACGACGTGA	000032219	Rps13	41.436	0	-5.4072	0.0040762	0.99592	0.0081524	0.03381
CTACCGCCGTAGCGTCCCCA	000032218	Rps13	54.928	0.92863	-4.8579	0.0024715	0.99753	0.0049429	0.023178
CTACCGCCGTAGCGTCCCCA	000032218	Rps13	64.563	1.325	-4.8176	0.0026068	0.99739	0.0052137	0.024107
TCAAATGGTAGAGATCCTCG	000032220	Rps13	41.436	1.325	-4.19	0.0058922	0.99411	0.011784	0.044704
ACAAAACTGCAAAAGAGGAA	000024166	Mad2l1	325.71	13.25	-4.519	0.00022237	0.99978	0.00044474	0.0035728
TCAGCACTCACAGAAAAACT	000024168	Mad2l1	210.07	9.2748	-4.3605	0.00089084	0.99911	0.0017817	0.010636
GTGCTCAGTTCAGAAACTGG	000024167	Mad2l1	238.98	13.25	-4.0739	0.00084562	0.99915	0.0016912	0.010211
TGAGATACTTTATGAGCTCG	000024169	Mad2l1	182.33	11.144	-3.9162	0.0018355	0.99816	0.003671	0.018481
GAACAATCAGGAGCTCAAGA	000074337	Gm10220	53.963	1.325	-4.5632	0.0036893	0.99631	0.0073786	0.031313
GAACAATCAGGAGCTCAAGA	000074337	Gm10220	98.412	3.7145	-4.3982	0.0030589	0.99694	0.0061178	0.027202
TTATAAGATTCTCCCCCAGC	000074339	Gm10220	156.11	13.25	-3.4627	0.0038016	0.9962	0.0076033	0.032049
TGTCGAGTTTGCCTGTGGTA	000074338	Gm10220	201.4	18.55	-3.372	0.0025274	0.99747	0.0050549	0.023572
CGTGCCTCCCCACTACAAGG	000021619	Timm10	507.83	13.25	-5.1582	2.0457e-05	0.99998	4.0914e-05	0.00048071
CCAAGTACTTGGATACACAT	000021618	Timm10	321.17	9.2863	-4.969	0.0001547	0.99985	0.0003094	0.0026632
GGGGAGGCACGCACTTCCGG	000021620	Timm10	289.09	11.925	-4.4883	0.00033563	0.99966	0.00067127	0.0049716
CGTGCCTCCCCACTACAAGG	000021619	Timm10	440.18	55.718	-2.9595	0.0004225	0.99958	0.00084499	0.005959
CTTGTCTAAACTCCCTATTG	000002343	Cct7	174.42	5.2999	-4.7993	0.0008917	0.99911	0.0017834	0.010644
CTGCAGGATGGACAACATCG	000002342	Cct7	376.78	21.2	-4.0889	0.00020064	0.9998	0.00040128	0.0032904
GGAAACCTACCTCCACTGTG	000002344	Cct7	87.69	9.2748	-3.1097	0.011649	0.98835	0.023299	0.074522
CTGCAGGATGGACAACATCG	000002342	Cct7	317.36	112.36	-1.4897	0.014576	0.98542	0.029152	0.08818
GAGGACCTCTTCCAAGCGTG	000024505	Amotl2	2210.6	139.12	-3.9803	3.7476e-10	1	7.4951e-10	2.2718e-08
CTTGGAGATCGGAGCACCCG	000024504	Amotl2	1849.2	148.4	-3.6305	6.7006e-09	1	1.3401e-08	3.286e-07
CCTGAGCCATTACAGCGTGT	000024502	Amotl2	1460.9	351.12	-2.0537	7.7746e-06	0.99999	1.5549e-05	0.00020489
GAGGACCTCTTCCAAGCGTG	000024505	Amotl2	1839.3	460.6	-1.9952	1.9722e-06	1	3.9443e-06	5.9942e-05
ATACGACAAGCTCTGTAAGG	000041934	Rps25	154.18	2.6499	-5.4099	0.00062184	0.99938	0.0012437	0.0080627
ATACGACAAGCTCTGTAAGG	000041934	Rps25	236.49	11.144	-4.2896	0.00071018	0.99929	0.0014204	0.0089228
CTTCAGTCTCTCAGAGACCA	000041935	Rps25	64.563	2.6499	-4.1669	0.0054171	0.99458	0.010834	0.041964
GAAGAAAGATGCCGGAAAGT	000041936	Rps25	60.708	2.6499	-4.0795	0.006125	0.99388	0.01225	0.046035
GTAAGCCAATAGCAAACAGA	000013557	Ppp1cb	377.74	17.225	-4.3773	0.00014979	0.99985	0.00029959	0.0025936
GAGACTTGATACACAACCCT	000013556	Ppp1cb	578.18	38.424	-3.8768	3.8971e-05	0.99996	7.7941e-05	0.00084159
ACCTGTATCAGGTACGTCAG	000013554	Ppp1cb	946.28	141.77	-2.7301	1.5089e-05	0.99998	3.0177e-05	0.00036785
ACCTGTATCAGGTACGTCAG	000013554	Ppp1cb	688.12	126.29	-2.4366	0.00016329	0.99984	0.00032657	0.0027853
CTTGGCGTCCGTAAAGATGG	000031255	Tceb2	209.11	9.2748	-4.3539	0.00090593	0.99909	0.0018119	0.010779
GATGCGCTTCAGTTCGAACA	000031256	Tceb2	177.31	7.9498	-4.3164	0.0013419	0.99866	0.0026839	0.014567
GCTTCACTAGCCAGACAGCA	000031257	Tceb2	281.38	14.575	-4.1804	0.00048565	0.99951	0.0009713	0.006649
GCTTCACTAGCCAGACAGCA	000031257	Tceb2	186.14	34.359	-2.404	0.0087673	0.99123	0.017535	0.060207
AAAGATATAAAGGAACTCGG	000020830	Dbf4	209.79	5.5718	-5.0034	0.00049808	0.9995	0.00099616	0.0067795
AAAGATATAAAGGAACTCGG	000020830	Dbf4	126.24	7.9498	-3.8295	0.0037868	0.99621	0.0075735	0.03195
AGTTTATACACGGCAGACTG	000020832	Dbf4	211.03	15.9	-3.6492	0.0017251	0.99827	0.0034502	0.017628
AATATGGACGGCGATAAATG	000020831	Dbf4	434.6	35.774	-3.5662	0.00020306	0.9998	0.00040612	0.003324
TGTGCTCCATTTCCCAGGAG	000038221	1600014C10Rik	96.363	3.9749	-4.2906	0.003469	0.99653	0.0069379	0.029902
ACCAACCAAGCCACCGACGA	000038218	1600014C10Rik	276.56	14.575	-4.1555	0.00052322	0.99948	0.0010464	0.0070509
GGCCGTCAAGCACTCTGGAA	000038220	1600014C10Rik	80.103	3.7145	-4.1046	0.0049493	0.99505	0.0098987	0.03915
GGCCGTCAAGCACTCTGGAA	000038220	1600014C10Rik	43.363	5.2999	-2.816	0.024775	0.97522	0.04955	0.13108
AAGTGGGGCATGGAGTACAA	000035114	Snrpf	105.28	0.92863	-5.7841	0.00060286	0.9994	0.0012057	0.0078772
GCTGACAGGGAAGCCAGTGA	000035115	Snrpf	34.33	0	-5.1428	0.0055337	0.99447	0.011067	0.042631
GTGATGGTGAAACTTAAGTG	000035117	Snrpf	54.927	1.325	-4.5883	0.003569	0.99643	0.0071381	0.030532
AAGTGGGGCATGGAGTACAA	000035114	Snrpf	65.527	2.6499	-4.188	0.0052568	0.99474	0.010514	0.04101
AAGTACGTGAAGCTGAACGT	000071052	Kctd10	934.72	67.574	-3.7703	2.4764e-06	1	4.9528e-06	7.3652e-05
AAGTACGTGAAGCTGAACGT	000071052	Kctd10	765.17	104.01	-2.8672	3.9033e-05	0.99996	7.8066e-05	0.00084282
GCTTCCCACAGCGGTCAATG	000071055	Kctd10	1259.5	312.95	-2.0054	2.4285e-05	0.99998	4.8571e-05	0.00055786
ACAACAAGTACTCCTACACC	000071053	Kctd10	1313.4	363.04	-1.8522	3.6252e-05	0.99996	7.2504e-05	0.00078981
TGGAGGAGATACCGGTGTCG	000069291	Hist1h2bj	93.835	1.8573	-5.0527	0.0016359	0.99836	0.0032718	0.016934
CTTGGAGGAGATACCGGTGT	000069290	Hist1h2bj	46.536	0.92863	-4.6234	0.0033392	0.99666	0.0066783	0.029055
CGACACCGGTATCTCCTCCA	000069288	Hist1h2bj	70.185	2.7859	-4.2329	0.0048144	0.99519	0.0096287	0.038333
CGACACCGGTATCTCCTCCA	000069288	Hist1h2bj	67.454	9.2748	-2.736	0.020911	0.97909	0.041821	0.11561
ATGTCTCAAAGTTGATCCTG	000073173	BC061237	350.16	6.5004	-5.549	6.8286e-05	0.99993	0.00013657	0.0013562
AATGCCCCAGGACATCAGTG	000073172	BC061237	151.29	3.9749	-4.936	0.0010181	0.99898	0.0020362	0.011792
AATGCCCCAGGACATCAGTG	000073172	BC061237	250.99	7.429	-4.9019	0.00034721	0.99965	0.00069443	0.0051062
TGAGCTTAGATTCAATCAGG	000073175	BC061237	456.2	150.44	-1.5941	0.0052605	0.99474	0.010521	0.041026
GCAGGACACAGATTTCTGGT	000060597	Atrip	341.12	15.9	-4.3395	0.00022466	0.99978	0.00044932	0.003602
AATTCCGCGTGCTCACCGAA	000060596	Atrip	668.76	46.374	-3.8215	1.9188e-05	0.99998	3.8376e-05	0.00045463
TTGGTAACCCATCTAATCGG	000060599	Atrip	622.51	143.94	-2.105	0.00054497	0.99946	0.0010899	0.0072781
TTGGTAACCCATCTAATCGG	000060599	Atrip	428.81	117.92	-1.8537	0.0033307	0.99667	0.0066614	0.02901
ATGTGTGATTCCTTCAGACT	000041351	Sf3a3	183.85	5.5718	-4.814	0.00079105	0.99921	0.0015821	0.0096966
TTTCAACCTATCCAGACCCA	000041353	Sf3a3	329.56	11.925	-4.6767	0.00018477	0.99982	0.00036954	0.0030772
ATGTGTGATTCCTTCAGACT	000041351	Sf3a3	215.85	7.9498	-4.5987	0.00067227	0.99933	0.0013445	0.0085597
CAATTCCGATCACCGCACTC	000041352	Sf3a3	92.309	13.001	-2.7365	0.01591	0.98409	0.031821	0.094272
GGTGGTGCTCTAACTCAAGG	000068817	Tango6	343.05	18.55	-4.1374	0.00026777	0.99973	0.00053554	0.0041453
AAACCCTGAGCATGTCCATG	000068816	Tango6	1051.3	59.624	-4.1175	6.3872e-07	1	1.2774e-06	2.1641e-05
TTTAGAGCCGCTACGCACGG	000068819	Tango6	255.36	23.85	-3.3669	0.0014422	0.99856	0.0028844	0.015395
GGTGGTGCTCTAACTCAAGG	000068817	Tango6	273.88	61.289	-2.1417	0.0058824	0.99412	0.011765	0.044656
GTTAGGTCATCGTATTGAGG	000031813	Rpl4	66.49	1.325	-4.8594	0.0024563	0.99754	0.0049125	0.023066
GTTAGGTCATCGTATTGAGG	000031813	Rpl4	64.845	1.8573	-4.5264	0.0036783	0.99632	0.0073565	0.031242
AGAAAACAGATGTGTCGTGG	000031810	Rpl4	91.545	3.9749	-4.2174	0.0039234	0.99608	0.0078468	0.032838
GCAAAATGAGAAACCGACGG	000031811	Rpl4	78.577	3.7145	-4.0772	0.0051652	0.99483	0.01033	0.040459
TGGTGTAAACAACCGGACGT	000017765	Dtymk	186.91	8.3576	-4.3277	0.001191	0.99881	0.0023819	0.0133
ATTAAGGCGAAGTTGAACCA	000017762	Dtymk	185.98	9.2748	-4.1857	0.0013711	0.99863	0.0027423	0.014802
TGGTGTAAACAACCGGACGT	000017765	Dtymk	318	18.55	-4.0283	0.00038453	0.99962	0.00076907	0.0055353
CGTGCTGGCAAGACCACGCA	000017764	Dtymk	37.381	1.8573	-3.7477	0.0099696	0.99003	0.019939	0.066342
CCTGGTGGGGAACTTAACCC	000032525	Nudt21	450.1	30.645	-3.8334	0.00012991	0.99987	0.00025982	0.0023074
ACTAAAACGCTTAATGACAG	000032522	Nudt21	1036	121.65	-3.0798	3.8721e-06	1	7.7443e-06	0.00011004
CCGAACTGGTTGACCCCCCG	000032524	Nudt21	1359.7	221.27	-2.6139	1.6776e-06	1	3.3553e-06	5.1849e-05
CCTGGTGGGGAACTTAACCC	000032525	Nudt21	580.1	131.17	-2.1364	0.00066195	0.99934	0.0013239	0.0084628
ACGACAGTGCCAAAGCCGGG	000010973	Grpel1	308.2	20.43	-3.8509	0.00050736	0.99949	0.0010147	0.0068751
ACGACAGTGCCAAAGCCGGG	000010973	Grpel1	379.67	27.824	-3.7232	0.00028554	0.99971	0.00057107	0.0043663
TGGCAGATACTGAGAATCTA	000010975	Grpel1	338.23	26.499	-3.6248	0.00047545	0.99952	0.0009509	0.0065455
GTAGCTGTGCACAACAAGCG	000010974	Grpel1	210.07	18.55	-3.4325	0.002165	0.99783	0.00433	0.020952
TGGTAACATTAACTGAGTCA	000026641	Cenpk	486.63	21.2	-4.4572	4.8285e-05	0.99995	9.657e-05	0.0010099
TACCAACGGAGAAGTGGTAC	000026639	Cenpk	301.34	25.073	-3.5355	0.00075506	0.99924	0.0015101	0.0093493
ATGCTTAAAGGGAGCAACAG	000026638	Cenpk	88.494	9.2863	-3.1211	0.011418	0.98858	0.022836	0.073362
TACCAACGGAGAAGTGGTAC	000026639	Cenpk	141.65	15.9	-3.0774	0.0065416	0.99346	0.013083	0.048285
GAAGGGACAAGTCAAAAACG	000022586	Cdc23	217.78	2.6499	-5.9055	0.00019465	0.99981	0.00038931	0.0032101
GAGATGCTGATACTTCTGCA	000022587	Cdc23	347.87	11.925	-4.7545	0.0001425	0.99986	0.00028501	0.0024924
TGATGTTAAAGAGTATGACC	000022589	Cdc23	213.93	9.2748	-4.3866	0.00083324	0.99917	0.0016665	0.010095
GGTATTTATCAATTTCACAG	000022588	Cdc23	395.17	93.791	-2.0633	0.0027002	0.9973	0.0054005	0.024772
TCTTCTCTAGATATACCCGA	000028925	Rae1	138.84	0.92863	-6.1801	0.00028614	0.99971	0.00057228	0.004374
TCTTCTCTAGATATACCCGA	000028925	Rae1	111.78	7.9498	-3.6555	0.0052684	0.99473	0.010537	0.041071
GATGTCACTTCGATATCCTG	000028924	Rae1	295.83	25.174	-3.5034	0.00082597	0.99917	0.0016519	0.010031
ATAGCCACACACCGATGCTA	000028922	Rae1	261.14	22.525	-3.4781	0.0012076	0.99879	0.0024152	0.013439
GACCACCCTGCACATATGGA	000037143	Vps11	1575.5	212	-2.8879	2.1626e-07	1	4.3252e-07	8.0551e-06
TCAGAGCCTCCCGATCGCCT	000037145	Vps11	1115.9	243.8	-2.1898	2.5287e-05	0.99997	5.0575e-05	0.00057741
GCAGCTTCCCGATATACCGA	000037144	Vps11	893.28	227.9	-1.966	0.0001727	0.99983	0.0003454	0.0029123
GCAGCTTCCCGATATACCGA	000037144	Vps11	939.11	245.16	-1.9332	0.00015224	0.99985	0.00030449	0.0026282
AGGCTGGCCCCGTTAGCCGT	000035999	Med26	804.63	29.149	-4.7399	2.1982e-06	1	4.3964e-06	6.6134e-05
CGGAGCTCTTACATACCCAA	000036000	Med26	369.07	14.575	-4.5705	0.00013611	0.99986	0.00027223	0.0024005
AGAATCGCAACGACATCCAA	000035998	Med26	491.45	33.124	-3.8511	8.7035e-05	0.99991	0.00017407	0.0016608
TCTTGTAGGAGACACGACTA	000036001	Med26	389.31	45.049	-3.0834	0.00055732	0.99944	0.0011146	0.0074034
AATCGATTCCATATGATGAG	000072309	Iars2	677.43	18.55	-5.117	4.5235e-06	1	9.047e-06	0.0001265
AAATCGGCGTTTGTCCGCTG	000072308	Iars2	175.38	11.925	-3.7705	0.0022775	0.99772	0.0045549	0.021786
AGGCGGCAGATACCGTGACA	000072310	Iars2	323.78	33.124	-3.2506	0.00083327	0.99917	0.0016665	0.010095
CCAAACTAAAACGCTAACAG	000072311	Iars2	373.05	71.504	-2.3671	0.0018432	0.99816	0.0036864	0.018546
GCTGCAGGACGCTGTGAACT	000048947	Med21	424	9.2748	-5.3703	3.8073e-05	0.99996	7.6146e-05	0.00082479
GCTGCAGGACGCTGTGAACT	000048947	Med21	270.06	40.86	-2.695	0.0027518	0.99725	0.0055036	0.025126
ATTGGTGTATTACAGCAGTG	000048944	Med21	845.1	176.22	-2.2553	9.4738e-05	0.99991	0.00018948	0.0017823
GCAGCTGTAGACTCTTCACT	000048946	Med21	1098.6	229.37	-2.2549	2.2378e-05	0.99998	4.4755e-05	0.0005196
TCATAGCCAATCAAGTAGAG	000078572	Gm21119	65.608	0	-6.0576	0.0017488	0.99825	0.0034975	0.017806
CCACATGATGTTGACTGGAG	000078570	Gm21119	49.145	2.6499	-3.7802	0.0091267	0.99087	0.018253	0.062091
TCATAGCCAATCAAGTAGAG	000078572	Gm21119	52.036	3.9749	-3.4142	0.01284	0.98716	0.025679	0.080146
CCACATGATGTTGACTGGAG	000078570	Gm21119	53.402	4.6431	-3.2691	0.01458	0.98542	0.029159	0.088187
GATCGAACGATCTGTCGTGG	000013400	Pole2	491.3	5.5718	-6.2271	9.2892e-06	0.99999	1.8578e-05	0.00023967
CCACAGTGGCTTATACACCG	000013399	Pole2	174.7	2.7859	-5.5363	0.00044152	0.99956	0.00088305	0.0061674
ATAGCGTTCAAGATACAGCT	000013398	Pole2	178.27	3.9749	-5.1713	0.00060465	0.9994	0.0012093	0.0078944
CCACAGTGGCTTATACACCG	000013399	Pole2	71.308	3.9749	-3.8614	0.0068688	0.99313	0.013738	0.050091
CAGCCTGTTCCTTCCACCAT	000077917	Gm4305	69.381	0	-6.1371	0.0015598	0.99844	0.0031195	0.01634
TTCATAGGGCGGCCATCCAA	000077920	Gm4305	172.49	3.9749	-5.124	0.00067385	0.99933	0.0013477	0.0085753
CCTCGCTTCACCCGGGAATC	000077918	Gm4305	211.03	7.9498	-4.5663	0.00073054	0.99927	0.0014611	0.0091208
TTCATAGGGCGGCCATCCAA	000077920	Gm4305	157.92	7.429	-4.2368	0.001802	0.9982	0.003604	0.018213
ACACCGGGGAAGTATACCGA	000030510	Snrpd3	45.01	0	-5.5239	0.0035392	0.99646	0.0070784	0.030361
GCCGATTAAAGTCTTGCACG	000030513	Snrpd3	132.02	3.9749	-4.7408	0.0015187	0.99848	0.0030374	0.016008
ACACCGGGGAAGTATACCGA	000030510	Snrpd3	20.236	0	-4.4085	0.011866	0.98813	0.023731	0.075533
CTGGAACAGGTATATATACG	000030512	Snrpd3	51.072	3.9749	-3.3878	0.013292	0.98671	0.026585	0.082282
GGAAAAACACCCTGGCCCGA	000014884	Rpl19	141.13	0	-7.1511	0.00027289	0.99973	0.00054579	0.0042074
GGAAAAACACCCTGGCCCGA	000014884	Rpl19	191.76	7.9498	-4.4288	0.0010279	0.99897	0.0020558	0.011878
CAGATCATACTCACGGGAGT	000014883	Rpl19	59.505	1.8573	-4.4044	0.0043614	0.99564	0.0087228	0.035554
CAGATCATACTCACGGGAGT	000014883	Rpl19	41.436	1.325	-4.19	0.0058922	0.99411	0.011784	0.044704
AAATATTATCTCCCCTATGG	000047068	Tada3	525.18	45.049	-3.5143	9.6079e-05	0.9999	0.00019216	0.0018035
GCATCATTCTTGGGGATCCG	000047070	Tada3	901.95	83.473	-3.4181	5.4119e-06	0.99999	1.0824e-05	0.00014883
GAAGGTCTGTCCCCGCTACA	000047069	Tada3	2313.1	383.52	-2.5893	1.3847e-08	1	2.7695e-08	6.4377e-07
GCATCATTCTTGGGGATCCG	000047070	Tada3	903.25	223.8	-2.0081	0.00014289	0.99986	0.00028577	0.0024986
TATTCTGTTGTACATATACA	000020396	Cul3	1455.1	205.37	-2.8188	5.2858e-07	1	1.0572e-06	1.8218e-05
TATTCTGTTGTACATATACA	000020396	Cul3	1538	287.87	-2.4135	1.2632e-06	1	2.5264e-06	4.0136e-05
GCAACATCTACAGGCAACGG	000020395	Cul3	797.88	192.12	-2.0485	0.00022445	0.99978	0.00044889	0.0035998
GCAACATCTACAGGCAACGG	000020395	Cul3	969.62	241.44	-2.0013	0.00010323	0.9999	0.00020646	0.0019108
ATCAGCTGCACATCACTCTG	000001009	Rplp0	69.381	2.6499	-4.2692	0.0046731	0.99533	0.0093463	0.037465
GCATATCCCGAATCTCAGTG	000001012	Rplp0	55.89	2.6499	-3.9622	0.0071887	0.99281	0.014377	0.051841
ATCAGCTGCACATCACTCTG	000001009	Rplp0	80.866	8.3576	-3.129	0.012359	0.98764	0.024717	0.077928
CAGATCCGCATGTCGCTCCG	000001011	Rplp0	45.01	6.5004	-2.6169	0.029542	0.97046	0.059085	0.14924
TGCGGCTAAGACAGTAACAG	000002324	Cct2	189.96	10.215	-4.0898	0.0014325	0.99857	0.002865	0.015312
GAGAATGGTAGCACCGTCGT	000002323	Cct2	148.4	7.9498	-4.0612	0.0023635	0.99764	0.004727	0.022413
CCATACCTGTGACAAGAGCG	000002322	Cct2	504.27	80.79	-2.627	0.00042286	0.99958	0.00084573	0.0059623
CAGTCTGAGAACCGCTTCCA	000002321	Cct2	145.71	41.788	-1.7777	0.028587	0.97141	0.057175	0.14569
AGGTGAGAGGGATCCCAATG	000044796	Vps16	572.39	17.225	-4.9756	1.3255e-05	0.99999	2.651e-05	0.00032867
GGCACTCAGAGTAAAGCGAT	000044799	Vps16	418.82	44.574	-3.2035	0.0003658	0.99963	0.00073161	0.0053211
AGGTGAGAGGGATCCCAATG	000044796	Vps16	720.92	143.94	-2.3164	0.00017415	0.99983	0.00034829	0.0029326
CTGGCACTCTTCACAGACAC	000044798	Vps16	864.37	389.54	-1.1478	0.0045446	0.99546	0.0090891	0.036688
GAACGCACAGCATTTCGACG	000041961	Snapc1	248.62	7.9498	-4.8017	0.00038998	0.99961	0.00077996	0.0056002
CTGATCTGGAACGTGTGTGG	000041960	Snapc1	483.74	25.174	-4.211	6.3539e-05	0.99994	0.00012708	0.0012741
AGCTCTCAGTCTGGTAAAGG	000041958	Snapc1	532.89	96.723	-2.4498	0.00047146	0.99953	0.00094291	0.0064993
GAACGCACAGCATTTCGACG	000041961	Snapc1	182.33	33.431	-2.4127	0.008993	0.99101	0.017986	0.06139
GATGTTCCTAATATTGAACA	000015021	Rps3a1	81.908	1.325	-5.1562	0.0015746	0.99843	0.0031493	0.01645
CATCATTCTGTAGATCAGCA	000015019	Rps3a1	201.4	6.6249	-4.7303	0.00070105	0.9993	0.0014021	0.0088347
CATCATTCTGTAGATCAGCA	000015019	Rps3a1	118.25	3.7145	-4.6607	0.0019107	0.99809	0.0038213	0.019048
AAAATTCAAGCTAATCACTG	000015018	Rps3a1	88.654	3.9749	-4.1716	0.0042313	0.99577	0.0084625	0.034751
AAGATGAGTAAGGAGATCGG	000001993	Cap1	1686	135.58	-3.6266	1.8483e-08	1	3.6966e-08	8.4201e-07
GACACGATTTGTGTAAAACA	000001996	Cap1	805.59	157.67	-2.3458	9.4803e-05	0.99991	0.00018961	0.0017835
AAGATGAGTAAGGAGATCGG	000001993	Cap1	1415.6	321.97	-2.1329	6.9015e-06	0.99999	1.3803e-05	0.00018448
CATACTTCAGACATGCACTG	000001995	Cap1	1090.9	382.59	-1.5092	0.00041829	0.99958	0.00083658	0.0059104
AGTATGATAGGACCTGTGAG	000043553	Wdr82	510.72	21.2	-4.5268	3.5986e-05	0.99996	7.1972e-05	0.00078466
ACTTTCCTGGACACAGCAAG	000043552	Wdr82	513.61	30.474	-4.0312	5.831e-05	0.99994	0.00011662	0.0011837
TTACCTTATCAAAAGAACGA	000043555	Wdr82	463.83	122.58	-1.9113	0.0023432	0.99766	0.0046865	0.022267
ACTTTCCTGGACACAGCAAG	000043552	Wdr82	313.54	122.58	-1.3478	0.020342	0.97966	0.040684	0.11329
AGAAAGTAGTGGCCTCGCAG	000046841	Gpn2	266.92	17.225	-3.8779	0.00075755	0.99924	0.0015151	0.0093743
AACCTGGACCCCGCTAACGA	000046840	Gpn2	782.72	157.87	-2.3025	0.00012212	0.99988	0.00024424	0.0021952
AGAAAGTAGTGGCCTCGCAG	000046841	Gpn2	319.65	77.076	-2.038	0.0049025	0.9951	0.0098051	0.038871
GGGCAATTCCACGTGCAGCA	000046843	Gpn2	434.6	124.55	-1.7948	0.0036691	0.99633	0.0073382	0.03118
GTGGCTTCTCAACAAAACGG	000071322	Gmppb	244.12	3.7145	-5.7003	0.00018028	0.99982	0.00036056	0.003018
GTGGCTTCTCAACAAAACGG	000071322	Gmppb	119.49	3.9749	-4.5981	0.0020005	0.998	0.0040011	0.019723
TTCCCAGTTATGGCCAAGGA	000071323	Gmppb	314.14	15.9	-4.2209	0.00033183	0.99967	0.00066366	0.0049263
TTCCCAGTTATGGCCAAGGA	000071323	Gmppb	393.65	104.93	-1.8974	0.0038106	0.99619	0.0076212	0.032109
GCAGAGATCGGCATGTACTG	000020452	Cops3	609.01	23.85	-4.6175	1.3419e-05	0.99999	2.6838e-05	0.00033211
TCATGGTAAGCATTGCTGAG	000020453	Cops3	363.29	18.55	-4.2199	0.00020154	0.9998	0.00040308	0.0033034
ATGGAGGAATGATCTATACG	000020450	Cops3	761.36	91.934	-3.0362	2.9365e-05	0.99997	5.8729e-05	0.00065712
GATGGGACAAGTTCTTCGCA	000020451	Cops3	1440.6	378.94	-1.9238	1.5123e-05	0.99998	3.0247e-05	0.00036844
AGCACTCACCTCCCAGCATG	000005394	Fau	211.03	7.9498	-4.5663	0.00073054	0.99927	0.0014611	0.0091208
AAGCACGACTTGATCTTCGG	000005393	Fau	276.56	21.2	-3.6442	0.00086664	0.99913	0.0017333	0.010407
CCAGGAACTACACACCCTCG	000005395	Fau	39.67	2.7859	-3.4253	0.013984	0.98602	0.027967	0.085511
CCAGGAACTACACACCCTCG	000005395	Fau	51.072	3.9749	-3.3878	0.013292	0.98671	0.026585	0.082282
CTCTTGATATCATTAATGCG	000019903	Smc1a	762.12	55.718	-3.75	9.7817e-06	0.99999	1.9563e-05	0.00025062
CCAGGTGATGGAGCAATTAG	000019902	Smc1a	1721.8	150.44	-3.508	1.8978e-08	1	3.7956e-08	8.6284e-07
TGGAGGTCACCAACGCCACA	000019905	Smc1a	1222.8	241.15	-2.3375	8.6779e-06	0.99999	1.7356e-05	0.00022577
TGGAGGTCACCAACGCCACA	000019905	Smc1a	843.75	172.72	-2.2817	8.8847e-05	0.99991	0.00017769	0.0016883
AGAACCACTGTGATGCTACG	000010474	Mcm7	547.34	21.2	-4.6265	2.3261e-05	0.99998	4.6522e-05	0.00053724
GATCTCCGGAGCAATAGAAG	000010476	Mcm7	116.72	4.6431	-4.3827	0.0025293	0.99747	0.0050585	0.023582
AATCCTGAGACTTACCAACT	000010473	Mcm7	234.16	13.25	-4.0446	0.00091607	0.99908	0.0018321	0.010874
GATCTCCGGAGCAATAGAAG	000010476	Mcm7	134.91	9.2748	-3.7254	0.003773	0.99623	0.0075461	0.03187
CTTGAAGAGATCCGCAAATG	000018356	Ube2l3	961.7	45.049	-4.3858	9.1083e-07	1	1.8217e-06	2.9876e-05
CCTTCTCATCGATGTTAGGG	000018355	Ube2l3	556.01	34.449	-3.9739	4.241e-05	0.99996	8.4821e-05	0.00090527
CTTGAAGAGATCCGCAAATG	000018356	Ube2l3	357.03	69.647	-2.3414	0.002185	0.99781	0.0043701	0.021097
AGGCTCCCTTATCATATGGA	000018354	Ube2l3	1130.3	278.24	-2.0184	4.3133e-05	0.99996	8.6265e-05	0.00091828
ACGATTGGAGGGCAACACGG	000014434	Rangap1	401.83	14.575	-4.6929	8.7516e-05	0.99991	0.00017503	0.0016678
GTCCAAATGCGTTGTCACTG	000014437	Rangap1	378.71	21.2	-4.0963	0.00019542	0.9998	0.00039083	0.0032204
AGAAGCTGGACCTCAATGGT	000014435	Rangap1	307.4	60.949	-2.3156	0.0034047	0.9966	0.0068095	0.029467
ACGATTGGAGGGCAACACGG	000014434	Rangap1	375.34	93.791	-1.9892	0.0035883	0.99641	0.0071767	0.03066
CAGGTGGTTTGGCAGCAGCT	000034456	Krtap4-13	273.67	18.55	-3.8125	0.00075303	0.99925	0.0015061	0.0093296
AGCTGGACACACAACAGCTG	000034454	Krtap4-13	70.345	6.6249	-3.226	0.012691	0.98731	0.025381	0.079492
AGCTGGACACACAACAGCTG	000034454	Krtap4-13	235.73	26.93	-3.0834	0.0024039	0.9976	0.0048079	0.022685
CAGGTGGTTTGGCAGCAGCT	000034456	Krtap4-13	252.51	59.432	-2.0687	0.0078376	0.99216	0.015675	0.055295
GCTAATTTCACCCGTCAAGG	000072274	Hjurp	292.94	5.2999	-5.5441	0.00012424	0.99988	0.00024848	0.002226
AGAGGCTGGTGTGACAGATG	000072273	Hjurp	373.81	19.501	-4.1924	0.00018642	0.99981	0.00037284	0.0030986
AGAGGCTGGTGTGACAGATG	000072273	Hjurp	298.72	26.499	-3.4462	0.00085377	0.99915	0.0017075	0.010287
ACGCTGCCTAGGATCACCAG	000072272	Hjurp	209.11	23.85	-3.0798	0.0031698	0.99683	0.0063396	0.027941
GGAACAGCTTGAAGGAACTG	000052733	Gps1	254.04	7.429	-4.9192	0.00033067	0.99967	0.00066134	0.0049125
GTGCCTCAACGTCATCAAGG	000052734	Gps1	753.56	50.349	-3.8772	8.889e-06	0.99999	1.7778e-05	0.00023075
GTGCCTCAACGTCATCAAGG	000052734	Gps1	851.38	100.29	-3.073	1.4242e-05	0.99999	2.8485e-05	0.00034961
GGAACAGCTTGAAGGAACTG	000052733	Gps1	151.29	18.55	-2.9616	0.0066308	0.99337	0.013262	0.048785
TGACGTTGACCACCGCCAGG	000047263	Exoc8	579.14	29.149	-4.2662	2.5108e-05	0.99997	5.0216e-05	0.00057398
GCCTCTCAGAGAGCGATCCG	000047261	Exoc8	225.49	27.824	-2.9741	0.0030164	0.99698	0.0060327	0.026917
CTTGTGAATGTAGAGCAGCG	000047260	Exoc8	406.62	165.3	-1.2935	0.01476	0.98524	0.029519	0.08904
CTTGTGAATGTAGAGCAGCG	000047260	Exoc8	635.99	263.67	-1.2671	0.0061783	0.99382	0.012357	0.046318
AGATGGCACCATCAATGCAG	000078330	Gm11237	460.61	11.925	-5.1585	3.2145e-05	0.99997	6.4291e-05	0.00071143
TCTTTGTAACGAGAGGCCCC	000078333	Gm11237	127.2	2.6499	-5.1344	0.0010891	0.99891	0.0021781	0.01241
CTTCCTGCAGGAGTGGCAAG	000078332	Gm11237	116.72	2.7859	-4.9586	0.0014504	0.99855	0.0029008	0.015465
TCTTTGTAACGAGAGGCCCC	000078333	Gm11237	68.659	3.7145	-3.8851	0.0068995	0.9931	0.013799	0.050268
AAATCGCATTCTGCTGTACG	000035170	Polr2i	268.53	4.6431	-5.5778	0.00015592	0.99984	0.00031184	0.0026811
TAACATGCTGTACCCCAAGG	000035173	Polr2i	155.63	7.429	-4.2158	0.001886	0.99811	0.0037719	0.018868
AAATCGCATTCTGCTGTACG	000035170	Polr2i	214.89	11.925	-4.0621	0.0011131	0.99889	0.0022263	0.012619
TAACATGCTGTACCCCAAGG	000035173	Polr2i	25.054	3.9749	-2.3888	0.042396	0.9576	0.084791	0.19428
TAGCAGAAATGCTAGATCAG	000049475	Rnf20	244.12	4.6431	-5.4409	0.00022949	0.99977	0.00045897	0.003669
TAGCAGAAATGCTAGATCAG	000049475	Rnf20	270.78	9.2748	-4.7252	0.00032872	0.99967	0.00065743	0.0048906
CAATCTGGGACACAGCACGG	000049473	Rnf20	538.67	26.499	-4.2946	3.5121e-05	0.99996	7.0242e-05	0.0007677
CAATCTGGGACACAGCACGG	000049473	Rnf20	577.5	287.87	-1.0019	0.019083	0.98092	0.038165	0.10804
TGTAGCGGAGCACCGCACAG	000014668	Rfc2	318	11.925	-4.6253	0.00021839	0.99978	0.00043678	0.0035204
TGTAGCGGAGCACCGCACAG	000014668	Rfc2	221.24	16.715	-3.649	0.001545	0.99845	0.00309	0.016224
TTGAAGCTCAACGAAATAGT	000014669	Rfc2	271.74	21.2	-3.6189	0.00093484	0.99907	0.0018697	0.011045
TCAGGGGCATCGATGTGGTG	000014667	Rfc2	225.05	67.79	-1.7164	0.017118	0.98288	0.034235	0.099615
AAAAATCGCTGTTCTTGAGG	000009177	Kif11	424	15.9	-4.6524	7.3054e-05	0.99993	0.00014611	0.0014339
CACGGTTAAAGAAACCACCA	000009180	Kif11	38.907	0.92863	-4.371	0.0045258	0.99547	0.0090517	0.036575
AAAAATCGCTGTTCTTGAGG	000009177	Kif11	285.32	26.002	-3.4065	0.0010196	0.99898	0.0020391	0.011803
ACAGGAAACTCTGAGTACAT	000009179	Kif11	409.67	149.51	-1.4481	0.0097469	0.99025	0.019494	0.065218
GGCACCAGGAATCCTCCACG	000037704	Wdr73	375.81	11.925	-4.8656	9.6904e-05	0.9999	0.00019381	0.0018153
GGCACCAGGAATCCTCCACG	000037704	Wdr73	219.71	13.929	-3.8859	0.0012474	0.99875	0.0024947	0.013781
TGAGTTGCCACAGAAAGCAA	000037705	Wdr73	373.89	27.824	-3.7011	0.00030924	0.99969	0.00061848	0.0046547
AATCCACTCAAGGACTCGAG	000037702	Wdr73	411.47	35.774	-3.4875	0.00027576	0.99972	0.00055152	0.0042438
GCAGGATATATTGTGTGTCG	000026396	Nup160	115.2	2.7859	-4.9398	0.0015018	0.9985	0.0030036	0.015866
CAGGGCCCAGATATCCGTTG	000026395	Nup160	125.27	5.2999	-4.3251	0.0024203	0.99758	0.0048406	0.0228
TTACCAGGTACGTCATAAGG	000026397	Nup160	109.85	5.2999	-4.1372	0.0034419	0.99656	0.0068837	0.029731
GCAGGATATATTGTGTGTCG	000026396	Nup160	112.74	6.6249	-3.8989	0.0041537	0.99585	0.0083074	0.034283
TTGTGGGCATCGGACTAATG	000019141	Zpr1	241.87	15.9	-3.8451	0.0010208	0.99898	0.0020416	0.011811
ATCCAGCTCGGGGATCCTTG	000019139	Zpr1	404.72	27.824	-3.8151	0.00020328	0.9998	0.00040656	0.0033268
GATACGGACAAGCTTCATGT	000019140	Zpr1	385.45	33.124	-3.5014	0.0003461	0.99965	0.00069221	0.0050932
AACAGGATCAGCCCACACGA	000019138	Zpr1	465.36	97.506	-2.2432	0.0011504	0.99885	0.0023007	0.012946
CCAGGTTTCCCGATCCAGAG	000041839	Ccdc101	412.43	27.824	-3.8423	0.00018343	0.99982	0.00036686	0.0030591
TCAGCTGATCAAGCAAACCC	000041840	Ccdc101	1139	165.62	-2.7744	3.9682e-06	1	7.9363e-06	0.00011247
CACAACCGCCAAGACTGATG	000041838	Ccdc101	1029.2	254.39	-2.0121	7.3293e-05	0.99993	0.00014659	0.0014383
TTTGGCCACATAGTCCCCTG	000041841	Ccdc101	1975.4	549.86	-1.8431	2.6503e-06	1	5.3005e-06	7.8378e-05
TGACGGTAAAGTTATCAGCA	000036757	Arid5b	696.7	47.699	-3.8406	1.4844e-05	0.99999	2.9688e-05	0.00036258
TGACGGTAAAGTTATCAGCA	000036757	Arid5b	1143.6	177.37	-2.6819	4.9045e-06	1	9.8091e-06	0.00013603
AGGCAGTCAACCCTCAACAG	000036754	Arid5b	1016.6	353.77	-1.5203	0.00053004	0.99947	0.0010601	0.0071182
GGGGCGTGTAGTTAAGTCCG	000036756	Arid5b	490.49	184.17	-1.4083	0.0073037	0.9927	0.014607	0.052489
GCACGGTCTCCTGCCCGATG	000035003	Med30	632.43	24.144	-4.6549	1.0498e-05	0.99999	2.0996e-05	0.00026694
GGACATCGTGTACCGCACCA	000035004	Med30	666.76	31.573	-4.3576	1.0554e-05	0.99999	2.1107e-05	0.00026828
GCACGGTCTCCTGCCCGATG	000035003	Med30	394.12	23.85	-3.991	0.00018704	0.99981	0.00037409	0.0031072
GGACATCGTGTACCGCACCA	000035004	Med30	903.88	201.4	-2.1605	8.8487e-05	0.99991	0.00017697	0.0016825
CTCACCAAAGTACTTAGTCG	000027275	Atp5d	194.65	7.9498	-4.4503	0.00097561	0.99902	0.0019512	0.011413
CCAAAGGCTCCAGTCAGCGT	000027274	Atp5d	104.07	6.6249	-3.7845	0.0051096	0.99489	0.010219	0.040139
CCAAAGGCTCCAGTCAGCGT	000027274	Atp5d	2.2886	39.931	3.6376	1	2.2011e-22	4.4022e-22	5.0985e-20
GTGAGTTCGTACCTGCGTCG	000027276	Atp5d	184.62	26.002	-2.7812	0.0056828	0.99432	0.011366	0.043507
CAGACTGCCCGCAAGTCCAC	000046288	Hist2h3c2	112.14	0.92863	-5.8744	0.00051314	0.99949	0.0010263	0.0069403
CCGCTACCGGCCCGGCACCG	000046289	Hist2h3c2	43.484	0	-5.4752	0.0037559	0.99624	0.0075117	0.031759
CAGACTGCCCGCAAGTCCAC	000046288	Hist2h3c2	202.36	7.9498	-4.506	0.00085031	0.99915	0.0017006	0.010259
GATCGCGCAGGACTTCAAGA	000046291	Hist2h3c2	308.36	26.499	-3.4918	0.00073797	0.99926	0.0014759	0.0091933
AGGAATTGGGGCTCTGCACC	000078029	Rps27rt	275.4	4.6431	-5.6141	0.00014025	0.99986	0.00028049	0.0024597
CAGAAGGATGCTCCTTCAGG	000078030	Rps27rt	192.73	5.2999	-4.9425	0.00063666	0.99936	0.0012733	0.0082167
AGGAATTGGGGCTCTGCACC	000078029	Rps27rt	166.71	5.2999	-4.7345	0.0010327	0.99897	0.0020653	0.011918
TGAAGGAGATCCTTTGCGAG	000078031	Rps27rt	258.25	13.25	-4.1853	0.0006183	0.99938	0.0012366	0.008027
GTTCGCCGCTTGGTAAAATG	000016913	Supt6	328.04	9.2863	-4.9995	0.00014014	0.99986	0.00028028	0.002458
GTTCGCCGCTTGGTAAAATG	000016913	Supt6	238.02	13.25	-4.0681	0.00085921	0.99914	0.0017184	0.010335
CCACCCTGAAACGTACGAGT	000016911	Supt6	77.814	6.5004	-3.3934	0.0099658	0.99003	0.019932	0.066324
ACAAGAAGAGAAAACGCCGT	000016910	Supt6	184.05	19.875	-3.1481	0.0038365	0.99616	0.007673	0.032274
TCCTGTACTACGTCTACATG	000004400	Dpagt1	171.53	5.2999	-4.7753	0.00094181	0.99906	0.0018836	0.01111
CTTTGGCAATACAACCATCG	000004399	Dpagt1	473.14	25.174	-4.1791	7.2504e-05	0.99993	0.00014501	0.001425
AGCACCGCTGATCACTCCCT	000004397	Dpagt1	644.67	117.92	-2.4408	0.00021747	0.99978	0.00043494	0.0035092
AGCACCGCTGATCACTCCCT	000004397	Dpagt1	368.47	97.506	-1.9072	0.0044249	0.99558	0.0088497	0.035945
GTTGTTGAGAGAACACCCAG	000024437	Metap2	99.254	1.325	-5.4303	0.0010054	0.99899	0.0020107	0.011681
AATACCCACCCACACAAGAT	000024434	Metap2	364.25	10.6	-4.9767	9.8544e-05	0.9999	0.00019709	0.0018409
GTGATGCTGATGGTGCAACT	000024436	Metap2	416.53	15.787	-4.6365	7.978e-05	0.99992	0.00015956	0.0015431
GAACGACTTCCGAGAAGCTG	000024435	Metap2	132.02	6.6249	-4.1248	0.0026944	0.99731	0.0053888	0.02473
GGGTTGCGCAGTGGGTATGG	000029868	Romo1	790.35	49.217	-3.9781	5.8123e-06	0.99999	1.1625e-05	0.00015858
TGACGAAGCCCATCTTCACG	000029869	Romo1	267.89	21.2	-3.5984	0.00099366	0.99901	0.0019873	0.011577
GGGTTGCGCAGTGGGTATGG	000029868	Romo1	597.45	54.324	-3.4353	5.7496e-05	0.99994	0.00011499	0.0011692
GACCCCGCATTCCGATCCTG	000029867	Romo1	823.15	183.87	-2.1564	0.00014217	0.99986	0.00028433	0.0024882
GAACCGAGCACACTCCACGT	000040452	Smu1	150.33	5.2999	-4.5862	0.0014262	0.99857	0.0028525	0.015256
AAATCGATGGTCATACCAGG	000040450	Smu1	173.45	10.6	-3.9107	0.0020397	0.99796	0.0040795	0.020016
TACCACAGACATACCTCACG	000040453	Smu1	130.09	7.9498	-3.8725	0.003479	0.99652	0.006958	0.029968
TACCACAGACATACCTCACG	000040453	Smu1	96.123	36.216	-1.3839	0.070895	0.9291	0.14179	0.2803
GACAGTCAGATTCCCCCCAG	000048599	Eprs	333.38	6.5004	-5.4784	8.6438e-05	0.99991	0.00017288	0.0016504
GACAGTCAGATTCCCCCCAG	000048599	Eprs	186.94	7.9498	-4.3923	0.0011222	0.99888	0.0022444	0.012697
CCACGAACTGTAGGAAACCG	000048598	Eprs	148.76	6.5004	-4.3196	0.0018557	0.99814	0.0037114	0.018641
ATGGTCACATTTATAAACTG	000048596	Eprs	465.36	104.01	-2.151	0.0013841	0.99862	0.0027681	0.014908
TGGCTGTGAATGGTGTGTCG	000015105	Ruvbl2	395.17	14.858	-4.6428	9.7959e-05	0.9999	0.00019592	0.0018322
GCGCTCACTCCCACATCCGG	000015104	Ruvbl2	59.745	2.6499	-4.0568	0.0063204	0.99368	0.012641	0.047119
ACTCGATCATCTTGGTACCC	000015102	Ruvbl2	321.85	22.525	-3.7786	0.00047573	0.99952	0.00095145	0.0065479
GCGCTCACTCCCACATCCGG	000015104	Ruvbl2	119.77	20.43	-2.4946	0.015239	0.98476	0.030478	0.091215
GGCCAGGCTCTACCACAAGA	000028211	Iscu	137.8	5.2999	-4.4615	0.001847	0.99815	0.003694	0.018574
TATGAAAACCCTCGGAACGT	000028212	Iscu	176.34	9.2748	-4.1094	0.001641	0.99836	0.0032821	0.01697
CCAGCTCCTTAGCCACAGAG	000028210	Iscu	102.14	10.6	-3.1525	0.00948	0.99052	0.01896	0.063863
TATGAAAACCCTCGGAACGT	000028212	Iscu	175.46	29.716	-2.5223	0.0084125	0.99159	0.016825	0.058344
AGCGCTTGTTGTAATGCGCC	000069304	Hist1h2bn	147.43	2.6499	-5.3458	0.00071196	0.99929	0.0014239	0.0089416
TTGGAGGAGATGCCGGTGTC	000069307	Hist1h2bn	115.2	2.7859	-4.9398	0.0015018	0.9985	0.0030036	0.015866
AGCGCTTGTTGTAATGCGCC	000069304	Hist1h2bn	83.917	2.7859	-4.4874	0.0032606	0.99674	0.0065211	0.02854
CTTGGACCCCTTCTTCGGGG	000069306	Hist1h2bn	282.34	17.225	-3.9586	0.00059533	0.9994	0.0011907	0.0077978
TGTTATCAACATATGCCATG	000076957	Gm14346	203.33	3.9749	-5.36	0.00038481	0.99962	0.00076961	0.0055379
ATGTAGTTGAGAACTTGATG	000076954	Gm14346	88.654	5.2999	-3.831	0.0058423	0.99416	0.011685	0.044424
TGTGTTTGGTGCTTTGTACA	000076956	Gm14346	178.27	26.499	-2.7047	0.0066129	0.99339	0.013226	0.048678
TGTGTTTGGTGCTTTGTACA	000076956	Gm14346	103.75	17.644	-2.4902	0.018101	0.9819	0.036202	0.10394
TATGAGCAACTCTCTTCTGA	000050067	Rpl10	75.163	1.325	-5.0338	0.0019008	0.9981	0.0038015	0.018981
CCTGATCTAGGCTCCAGACA	000050066	Rpl10	144.54	5.2999	-4.53	0.0016048	0.9984	0.0032096	0.016693
TATGAGCAACTCTCTTCTGA	000050067	Rpl10	11.443	0	-3.6373	0.023979	0.97602	0.047958	0.128
CATGGTAAAGAGTTGTGGCA	000050065	Rpl10	47.218	9.2748	-2.2305	0.042071	0.95793	0.084142	0.19323
ACCAAGGCCCAAAAGAAGGA	000069309	Hist1h2bp	46.536	0.92863	-4.6234	0.0033392	0.99666	0.0066783	0.029055
CTTCGAGCGCATCGCGAGCG	000069310	Hist1h2bp	229.34	10.6	-4.3116	0.00075268	0.99925	0.0015054	0.0093275
ACACCGAGTAGCTCTCCTTG	000069308	Hist1h2bp	53.963	2.6499	-3.9125	0.0076817	0.99232	0.015363	0.054488
CTTCTTGGAGCCCTTCTTCG	000069311	Hist1h2bp	113.67	14.858	-2.8542	0.011169	0.98883	0.022338	0.072173
GATCGATACACTGAAGGAAG	000012864	Pfdn2	258.62	26.93	-3.2165	0.0016442	0.99836	0.0032884	0.016993
GACCCGCAAGTGCTACCGCA	000012863	Pfdn2	350.93	91.934	-1.921	0.0048589	0.99514	0.0097177	0.038603
GACCCGCAAGTGCTACCGCA	000012863	Pfdn2	347.87	116.6	-1.5688	0.010278	0.98972	0.020557	0.067895
GATCGATACACTGAAGGAAG	000012864	Pfdn2	196.58	71.549	-1.4454	0.032918	0.96708	0.065837	0.16163
CGATCTCCGAGCGACCGTCG	000002183	Cbfb	183.09	6.6249	-4.5935	0.00097574	0.99902	0.0019515	0.011414
GCCTTGCAGATTAAGTACAC	000002184	Cbfb	293.91	23.85	-3.569	0.0007853	0.99921	0.0015706	0.0096398
AAGTCGACATATTCCCGGCT	000002182	Cbfb	319.92	29.149	-3.412	0.00071901	0.99928	0.001438	0.0090105
GCCTTGCAGATTAAGTACAC	000002184	Cbfb	451.63	95.648	-2.2275	0.0013093	0.99869	0.0026186	0.014306
AACGGAAAACAATATCGTGA	000007226	Pfdn6	239.94	13.25	-4.0797	0.00083227	0.99917	0.0016645	0.010086
AACGGAAAACAATATCGTGA	000007226	Pfdn6	238.02	31.573	-2.8754	0.0029864	0.99701	0.0059728	0.026701
GTCTAGCCTCTTCCCTACTG	000007228	Pfdn6	806.56	151.05	-2.409	8.0353e-05	0.99992	0.00016071	0.0015526
CCTGCTGGATGGATCCAACG	000007227	Pfdn6	680.32	151.05	-2.1638	0.00032834	0.99967	0.00065668	0.0048864
GGCCAAGACTCGCTCCTCCC	000069323	Hist1h2ai	308.2	5.5718	-5.5561	0.00010473	0.9999	0.00020945	0.0019323
ACGCGGCAAGCAGGGCGGCA	000069321	Hist1h2ai	429.78	17.225	-4.563	7.5125e-05	0.99992	0.00015025	0.0014673
AAGACTCGCTCCTCCCGGGC	000069320	Hist1h2ai	108.89	6.6249	-3.8492	0.0045494	0.99545	0.0090988	0.036711
GGCCAAGACTCGCTCCTCCC	000069323	Hist1h2ai	190.8	18.55	-3.2944	0.003067	0.99693	0.006134	0.027256
CGGACATTTGCTGACAACCC	000037679	Cpsf3l	255.36	11.925	-4.31	0.00056773	0.99943	0.0011355	0.0075141
CATGAAACTGTGGAGCGTGG	000037678	Cpsf3l	136.83	14.575	-3.1457	0.006445	0.99356	0.01289	0.047772
CATGAAACTGTGGAGCGTGG	000037678	Cpsf3l	107.57	14.858	-2.7753	0.012938	0.98706	0.025876	0.080625
TTACCCCAAATGCCGGTCTG	000037681	Cpsf3l	428.74	104.93	-2.0203	0.0023313	0.99767	0.0046625	0.02218
AGCAGGCTGCCAGACCGATG	000060224	Vac14	436.52	25.174	-4.0631	0.0001155	0.99988	0.000231	0.0020958
CATCTCAGCAAACTTCACAC	000060225	Vac14	257.29	26.499	-3.2315	0.0016389	0.99836	0.0032777	0.016955
TCAGTAGACAGGTATCAAGG	000060226	Vac14	355.5	42.717	-3.0277	0.00081389	0.99919	0.0016278	0.0099182
CATCTCAGCAAACTTCACAC	000060225	Vac14	225.81	65.932	-1.7607	0.015811	0.98419	0.031621	0.093822
GCTCTCGGTGCAATGCGCAG	000025272	Alg2	337.27	10.6	-4.866	0.00014362	0.99986	0.00028724	0.0025079
GCTCTCGGTGCAATGCGCAG	000025272	Alg2	253.28	9.2863	-4.6276	0.00043394	0.99957	0.00086787	0.0060886
CAGAAAGACCATGCGCACGT	000025271	Alg2	82.872	11.925	-2.698	0.018336	0.98166	0.036672	0.10494
ACTGGCCAGACGGCGTAAGA	000025270	Alg2	467.36	143.1	-1.7006	0.0037814	0.99622	0.0075628	0.031917
CAGAGTATGAATCGACACAC	000069752	Taf2	193.69	2.6499	-5.7372	0.00029594	0.9997	0.00059188	0.0044927
CAGAGTATGAATCGACACAC	000069752	Taf2	87.732	1.8573	-4.9567	0.0019155	0.99808	0.003831	0.019086
TACACCCACTGCTTTATTAG	000069753	Taf2	223.56	11.925	-4.1189	0.00095925	0.99904	0.0019185	0.011267
TTACCTCTTTAATCCAATGG	000069755	Taf2	187.91	10.6	-4.0255	0.0015562	0.99844	0.0031124	0.01631
TACAGAAAGCTGCTCATGGT	000018229	Tuba1b	45.01	0.92863	-4.5763	0.0035392	0.99646	0.0070784	0.030361
AGAGAGCCGCTCCATCAGCA	000018226	Tuba1b	88.494	2.7859	-4.5631	0.002886	0.99711	0.0057721	0.026032
AGAGAGCCGCTCCATCAGCA	000018226	Tuba1b	175.38	6.6249	-4.5318	0.0011266	0.99887	0.0022532	0.012736
TACAGAAAGCTGCTCATGGT	000018229	Tuba1b	27.945	1.325	-3.638	0.010948	0.98905	0.021895	0.071129
CATCGTGCCTCGGATCGGAG	000050953	Kirrel	1386.9	280.44	-2.302	4.1387e-06	1	8.2774e-06	0.00011679
CACCATTAATAATGTCATGG	000050952	Kirrel	1507.5	311.09	-2.273	2.5192e-06	1	5.0384e-06	7.4827e-05
GAGCCCACGACCCGGTACCG	000050954	Kirrel	688.99	197.42	-1.798	0.00085794	0.99914	0.0017159	0.010325
TGGGTAAACTACAATCCGGG	000050955	Kirrel	1506.1	447.84	-1.7475	2.6885e-05	0.99997	5.377e-05	0.00060946
TGTGGGCAGCTTCATCCTAG	000003976	Dad1	155.63	2.7859	-5.3706	0.00063718	0.99936	0.0012744	0.0082231
GTTCGGCTACTGTCTCCTCG	000003974	Dad1	334.38	21.2	-3.9172	0.00036396	0.99964	0.00072792	0.0053009
TGTGGGCAGCTTCATCCTAG	000003976	Dad1	71.308	3.9749	-3.8614	0.0068688	0.99313	0.013738	0.050091
GTTCGGCTACTGTCTCCTCG	000003974	Dad1	218.95	18.573	-3.4903	0.0018566	0.99814	0.0037132	0.018645
GTTTCCGAGTCTAAAATGGA	000018136	Ctr9	272.71	13.25	-4.2636	0.0004922	0.99951	0.0009844	0.006719
TATTGATCCTAGCAACCCGA	000018137	Ctr9	177.31	11.925	-3.7862	0.0021957	0.9978	0.0043914	0.021178
GGAGAAACGAGACATAGCCA	000018135	Ctr9	148.4	19.875	-2.8393	0.0077791	0.99222	0.015558	0.054994
CATCTGGCAAAACAAGAATG	000018134	Ctr9	113.71	15.9	-2.7629	0.012251	0.98775	0.024503	0.077409
CGCACCCTACGAAGCCAACG	000013387	Pold1	202.16	4.6431	-5.17	0.00046515	0.99953	0.00093029	0.0064302
AGGCGCTCTAGTAGTCGGAG	000013386	Pold1	214.89	10.6	-4.2181	0.0009626	0.99904	0.0019252	0.011294
AGGCGCTCTAGTAGTCGGAG	000013386	Pold1	327.28	34.359	-3.2148	0.00084059	0.99916	0.0016812	0.010164
GCCATCAGCCGGGACCAGCG	000013388	Pold1	76.126	7.9498	-3.1073	0.013311	0.98669	0.026622	0.082346
TCAATTCTGGAGCTAAACAG	000028128	Snw1	117.48	5.5718	-4.1723	0.003051	0.99695	0.006102	0.027147
CCTTTCCTATATCCGTATGG	000028127	Snw1	106.96	6.6249	-3.8237	0.0047641	0.99524	0.0095283	0.038012
TTCCAACTGGAAGAACGCTA	000028129	Snw1	150.33	10.6	-3.7055	0.0032192	0.99678	0.0064385	0.02826
TCAATTCTGGAGCTAAACAG	000028128	Snw1	109.85	14.575	-2.8314	0.011921	0.98808	0.023842	0.075798
TGTGCCACTTAAGGACATCG	000013641	Prim2	222.6	5.2999	-5.1494	0.00037859	0.99962	0.00075718	0.0054677
TGCAGCTGACGCATGCAAGG	000013640	Prim2	247.65	11.925	-4.2659	0.0006429	0.99936	0.0012858	0.0082833
TGCAGCTGACGCATGCAAGG	000013640	Prim2	331.09	48.289	-2.7523	0.0014643	0.99854	0.0029286	0.015575
CTCACGACTGGCAGTACGCG	000013639	Prim2	211.32	63.147	-1.7268	0.018588	0.98141	0.037176	0.10597
CCTGTCACTTACCAATGAGA	000020551	Eif2s3x	227.42	6.6249	-4.9048	0.00044828	0.99955	0.00089657	0.0062449
GCTTGGATATGCTAATGCTA	000020552	Eif2s3x	245.72	15.9	-3.8678	0.00095807	0.99904	0.0019161	0.011259
ATGTAGGAACCGTAGCAGAA	000020550	Eif2s3x	141.65	10.6	-3.6203	0.0038535	0.99615	0.0077071	0.032387
TGACTTACCTATCAACAGAA	000020553	Eif2s3x	251.75	39.931	-2.6265	0.0035654	0.99643	0.0071308	0.030516
TTGCTCTCGTACAGCAACTG	000045623	Csnk1a1	616.72	37.099	-4.0191	2.3644e-05	0.99998	4.7288e-05	0.00054474
CTGGTCAGCTAACATAAGTA	000045622	Csnk1a1	641.78	45.049	-3.8031	2.4633e-05	0.99998	4.9266e-05	0.00056465
AAAGGTGCTTACCGTATGTG	000045620	Csnk1a1	703.38	116.08	-2.5889	0.00010578	0.99989	0.00021157	0.0019482
CTGGTCAGCTAACATAAGTA	000045622	Csnk1a1	825.44	275.8	-1.5781	0.00092688	0.99907	0.0018538	0.010973
TAGATGTGGCAACCAAACGG	000072315	Nsl1	132.02	3.9749	-4.7408	0.0015187	0.99848	0.0030374	0.016008
CGCACTCGGAAGTCCTCTAG	000072312	Nsl1	369.07	21.2	-4.0592	0.00022309	0.99978	0.00044618	0.0035827
GGTCCAGAGGATGTACAACA	000072313	Nsl1	303.54	19.875	-3.8668	0.00052363	0.99948	0.0010473	0.0070555
GTAGAAGATTTGAAATGCCG	000072314	Nsl1	212.08	114.22	-0.887	0.087077	0.91292	0.17415	0.32388
TGTCATTCAAAGATGTGGGA	000001264	Atp5c1	340.16	5.2999	-5.759	6.2682e-05	0.99994	0.00012536	0.0012598
AGAACCTGTCCCATACACTC	000001261	Atp5c1	352.69	9.2748	-5.1053	9.8818e-05	0.9999	0.00019764	0.0018451
CCGATGTGGTCCTACCATTG	000001262	Atp5c1	225.49	6.6249	-4.8926	0.000463	0.99954	0.00092601	0.0064061
CCGATGTGGTCCTACCATTG	000001262	Atp5c1	190.72	35.288	-2.4015	0.0084232	0.99158	0.016846	0.058396
TGCTCAATCCACAAACAGCG	000021845	Txnrd1	406.65	19.875	-4.2875	0.00012284	0.99988	0.00024569	0.0022058
GGAGGAACGTGTGTGAATGT	000021843	Txnrd1	344.01	42.399	-2.9909	0.00094796	0.99905	0.0018959	0.011166
GGAGGAACGTGTGTGAATGT	000021843	Txnrd1	360.84	101.22	-1.8237	0.0055139	0.99449	0.011028	0.042514
TCTATGAGAATGCTTACGGG	000021844	Txnrd1	776.61	307.38	-1.3344	0.0028404	0.99716	0.0056808	0.025719
CGCCATGAACAGCGTCGGGG	000033871	Triap1	460.61	23.85	-4.2154	7.8601e-05	0.99992	0.0001572	0.0015234
CGCCATGAACAGCGTCGGGG	000033871	Triap1	493.59	39.002	-3.6281	0.00011048	0.99989	0.00022097	0.0020187
CAAACCAGCGGTTGAAGCAC	000033870	Triap1	140.69	11.925	-3.4545	0.0045632	0.99544	0.0091264	0.036794
CAAACCAGCGGTTGAAGCAC	000033870	Triap1	199.88	39.931	-2.295	0.0088802	0.99112	0.01776	0.060789
CGGGTACCGTTGCCAGAAGG	000028507	Prelid1	102.14	0	-6.6885	0.00065002	0.99935	0.0013	0.0083545
CGGGTACCGTTGCCAGAAGG	000028507	Prelid1	69.422	2.7859	-4.2173	0.0049256	0.99507	0.0098513	0.039013
TAACCGAAGACATAGTGCAC	000028508	Prelid1	96.123	17.644	-2.3811	0.021999	0.978	0.043998	0.12002
AGGAAGTCTCACCATCAGCC	000028506	Prelid1	654.55	157.87	-2.0449	0.00052149	0.99948	0.001043	0.0070326
CAAGTCCATGGAACAATCAC	000016282	Snrpd1	95.399	2.6499	-4.7231	0.00229	0.99771	0.0045799	0.021878
TCCACAAGTAGTGTATCTAG	000016285	Snrpd1	100.22	3.9749	-4.3466	0.0031509	0.99685	0.0063018	0.027815
TCCACAAGTAGTGTATCTAG	000016285	Snrpd1	142.66	9.2863	-3.8039	0.0032061	0.99679	0.0064121	0.02818
GTATTCGAGGCAATAACATT	000016284	Snrpd1	309.32	23.85	-3.6425	0.00062198	0.99938	0.001244	0.008063
CCTGTGAACATATCTAACAC	000049204	Tbcd	356.27	67.79	-2.3767	0.0020744	0.99793	0.0041489	0.020278
CTTCTGGTCACTCTTACCCG	000049206	Tbcd	923.85	194.08	-2.2451	6.1443e-05	0.99994	0.00012289	0.0012375
TACAGCTCACTCACTCGCGA	000049207	Tbcd	460.61	141.77	-1.693	0.004005	0.996	0.0080099	0.033358
CTTCTGGTCACTCTTACCCG	000049206	Tbcd	1139	353.77	-1.6841	0.00015923	0.99984	0.00031845	0.0027287
AAAGACAGGCTAAAATAGAG	000012570	Igbp1	79.017	0	-6.3222	0.0011822	0.99882	0.0023644	0.013227
GAAGTAGCAACTGAACCCAC	000012572	Igbp1	82.872	1.325	-5.1729	0.0015339	0.99847	0.0030679	0.016133
GAAGTAGCAACTGAACCCAC	000012572	Igbp1	4.5773	116.08	4.3918	1	3.0958e-76	6.1916e-76	6.2977e-73
AAAGACAGGCTAAAATAGAG	000012570	Igbp1	72.474	3.7145	-3.9621	0.0061563	0.99384	0.012313	0.046201
CTTGCTTATGACAGGTACAG	000078353	Speer4c	151.81	2.7859	-5.335	0.0006874	0.99931	0.0013748	0.0087069
CTTCATTACTCTCAGATGGA	000078352	Speer4c	311.26	9.2863	-4.9239	0.00017873	0.99982	0.00035745	0.0029974
CTTGCTTATGACAGGTACAG	000078353	Speer4c	60.708	1.325	-4.7302	0.0029455	0.99705	0.005891	0.026415
CTTCATTACTCTCAGATGGA	000078352	Speer4c	192.73	9.2748	-4.2368	0.0012122	0.99879	0.0024244	0.013479
ATAACAAGGCCATGACAACG	000013850	Psmb1	208.14	18.55	-3.4193	0.0022402	0.99776	0.0044804	0.02151
ATAACAAGGCCATGACAACG	000013850	Psmb1	312.78	53.86	-2.5159	0.0024042	0.9976	0.0048083	0.022685
TCAGACACTCGATTGAGTGA	000013852	Psmb1	162.85	35.774	-2.1556	0.01492	0.98508	0.02984	0.089785
GCGAAAACCGCAGCTGCACA	000013851	Psmb1	606.49	243.3	-1.3142	0.0059041	0.9941	0.011808	0.044773
CACCATCAACAAGAATGCTC	000014907	Rpl28	98.412	0.92863	-5.6878	0.00071216	0.99929	0.0014243	0.0089436
GCCGGCCGCCGATGGCAAAG	000014909	Rpl28	241.07	8.3576	-4.6931	0.00046716	0.99953	0.00093431	0.0064526
GAATAAGCAGACGTACAGCA	000014908	Rpl28	246.69	31.799	-2.9168	0.0026114	0.99739	0.0052228	0.024142
AATTAGCCCGTTGTAGCGGA	000014906	Rpl28	469.94	138.37	-1.7567	0.0032456	0.99675	0.0064912	0.028443
TCATAACCAACAAAGATGTG	000008712	Eif3e	195.62	7.9498	-4.4574	0.00095886	0.99904	0.0019177	0.011265
CTACCTGGCAGACAAACATG	000008711	Eif3e	368.47	34.359	-3.3853	0.0004649	0.99954	0.0009298	0.0064277
AATGCTTTAAGTTCGCTCTG	000008709	Eif3e	452.9	160.32	-1.4924	0.0069684	0.99303	0.013937	0.050643
AATGCTTTAAGTTCGCTCTG	000008709	Eif3e	489.01	185.73	-1.3919	0.0077064	0.99229	0.015413	0.054622
GGAGGTGCTGGAGCCCGAGG	000031049	Mrfap1	217.42	6.5004	-4.864	0.00051947	0.99948	0.0010389	0.0070099
CGTCATCCACGAGATGCGCG	000031048	Mrfap1	235.12	9.2748	-4.5224	0.00058229	0.99942	0.0011646	0.0076614
GGAGGTGCTGGAGCCCGAGG	000031049	Mrfap1	156.11	6.6249	-4.3649	0.0016359	0.99836	0.0032718	0.016934
CCAGATCAAGACGCAGGTCG	000031046	Mrfap1	242.6	13.929	-4.0283	0.00084911	0.99915	0.0016982	0.010246
GAGAGGCCGAATAACCAGGT	000017471	Cirh1a	190.8	2.6499	-5.7156	0.00031168	0.99969	0.00062335	0.0046834
TAAGGAACCAGCTGCGACGT	000017472	Cirh1a	50.35	0	-5.6823	0.0029014	0.9971	0.0058028	0.026129
TAAGGAACCAGCTGCGACGT	000017472	Cirh1a	97.326	1.325	-5.4023	0.0010545	0.99895	0.0021089	0.012108
TTCACGAACAGATGGCACGG	000017473	Cirh1a	93.835	2.7859	-4.6467	0.0025137	0.99749	0.0050273	0.023469
GGCCTGACAACACAGGACGG	000060238	Aars	193.69	10.6	-4.069	0.0014004	0.9986	0.0028008	0.015048
TGTTATACTGGATGAACACG	000060239	Aars	116.72	8.3576	-3.6531	0.0049855	0.99501	0.0099711	0.039378
AACTACCAATCAGACTCCAG	000060236	Aars	385.45	35.774	-3.3935	0.00039257	0.99961	0.00078514	0.0056279
TGTTATACTGGATGAACACG	000060239	Aars	154.18	14.575	-3.3167	0.0044818	0.99552	0.0089635	0.036302
GAACTCAGCAACTAAACCTG	000070450	Vprbp	392.2	22.525	-4.063	0.00017704	0.99982	0.00035409	0.0029732
CATCACTCAAAAGTGCACCC	000070448	Vprbp	150.33	10.6	-3.7055	0.0032192	0.99678	0.0064385	0.02826
GCACCACAGTGAGAATAGCA	000070451	Vprbp	79.981	5.2999	-3.6842	0.0073971	0.9926	0.014794	0.052983
CATCACTCAAAAGTGCACCC	000070448	Vprbp	187.67	29.716	-2.6188	0.0066513	0.99335	0.013303	0.048878
TGCCTTGCCACAGATAATCG	000070507	Dna2	106.8	1.8573	-5.2376	0.00119	0.99881	0.00238	0.013292
ACACGATGCGAAGGATACGG	000070504	Dna2	233.2	7.9498	-4.7097	0.00050176	0.9995	0.0010035	0.0068186
TGCCTTGCCACAGATAATCG	000070507	Dna2	95.399	3.9749	-4.2763	0.0035545	0.99645	0.007109	0.030454
GCCCTTCAGTCCAAACCTAG	000070506	Dna2	31.8	1.325	-3.8184	0.0090164	0.99098	0.018033	0.061508
TGTGGGGAGCTCATAAAATG	000070415	Tnpo3	194.65	6.6249	-4.6814	0.00079054	0.99921	0.0015811	0.0096915
TGTGGGGAGCTCATAAAATG	000070415	Tnpo3	70.948	2.7859	-4.2483	0.0047062	0.99529	0.0094125	0.037654
TAGATACTACCTCATACTGA	000070414	Tnpo3	338.23	39.749	-3.0574	0.00091873	0.99908	0.0018375	0.0109
AGCTTCGTGTAGGTTAGATG	000070413	Tnpo3	711.77	240.51	-1.5613	0.0016331	0.99837	0.0032662	0.016914
TGTAGGAGCAGTAGGAGTCG	000027517	Sf3b5	74.199	1.325	-5.0154	0.001954	0.99805	0.0039081	0.019372
CCACGCCGACACCACCAAGT	000027514	Sf3b5	135.03	3.7145	-4.8507	0.0013227	0.99868	0.0026455	0.014411
CCACGCCGACACCACCAAGT	000027514	Sf3b5	45.29	1.325	-4.3154	0.0050595	0.99494	0.010119	0.039838
GCAGTCCAAGTACATCGGCA	000027516	Sf3b5	118.53	9.2748	-3.5401	0.0054278	0.99457	0.010856	0.042024
GCAACCATAACTGAACCCCG	000016264	Eftud2	81.908	0	-6.3734	0.0010919	0.99891	0.0021838	0.012435
GTGGTGGAGATGGCCACACA	000016265	Eftud2	74	0.92863	-5.2812	0.0013623	0.99864	0.0027247	0.014733
GTGGTGGAGATGGCCACACA	000016265	Eftud2	64.563	1.325	-4.8176	0.0026068	0.99739	0.0052137	0.024107
AGAAAGGATCAGGTTCTCGT	000016262	Eftud2	52.036	1.325	-4.5117	0.0039464	0.99605	0.0078928	0.03298
TTAGGTGCTTACCTGAGTGT	000020981	Rpl3	72.474	0	-6.1992	0.0014239	0.99858	0.0028477	0.015239
TTAGGTGCTTACCTGAGTGT	000020981	Rpl3	53.963	0	-5.7804	0.0025547	0.99745	0.0051093	0.023752
TGTGGAAACTCCCCCAATGG	000020980	Rpl3	73.237	1.8573	-4.6994	0.0028583	0.99714	0.0057167	0.025833
TGTGGAAACTCCCCCAATGG	000020980	Rpl3	31.8	1.325	-3.8184	0.0090164	0.99098	0.018033	0.061508
TTTACAGCCAAGCCAGAACG	000049691	Dut	111.38	2.7859	-4.8916	0.0016402	0.99836	0.0032803	0.016965
TTTACAGCCAAGCCAGAACG	000049691	Dut	159.96	5.2999	-4.6752	0.0011772	0.99882	0.0023545	0.013185
TGATTATACAATATCACCCA	000049690	Dut	190.8	7.9498	-4.4216	0.001046	0.99895	0.002092	0.012035
TCCAGCTGGTGTCATAGACG	000049689	Dut	111.78	11.925	-3.1253	0.0087206	0.99128	0.017441	0.059966
TGTCATGGACTCTGGTGACG	000000176	Actg1	237.05	13.25	-4.0623	0.00087305	0.99913	0.0017461	0.010465
GGGCCAGAAAGACTCATACG	000000174	Actg1	172.49	17.225	-3.2509	0.0039106	0.99609	0.0078212	0.032756
AAGAGTTACGAGCTGCCCGA	000000173	Actg1	907.07	174.58	-2.3707	4.7637e-05	0.99995	9.5275e-05	0.00099824
TGTCATGGACTCTGGTGACG	000000176	Actg1	247.17	83.576	-1.553	0.019646	0.98035	0.039292	0.11035
GGGGCAGTAGAGTTTCACCA	000003634	Csnk2b	601.15	13.929	-5.3339	7.3403e-06	0.99999	1.4681e-05	0.0001949
GGGGCAGTAGAGTTTCACCA	000003634	Csnk2b	478.92	31.799	-3.8711	9.5459e-05	0.9999	0.00019092	0.0017937
GGTGGATGAAGACTACATCC	000003635	Csnk2b	638.53	185.73	-1.7761	0.0011973	0.9988	0.0023946	0.013355
GAGGCATCGCACAAATGGTG	000003633	Csnk2b	260.14	80.79	-1.6748	0.014416	0.98558	0.028832	0.087488
GATGTAACCATTACTAACGA	000017300	Tcp1	215.85	1.325	-6.5434	9.7911e-05	0.9999	0.00019582	0.0018314
AGTGACGATGTTGGGACAAG	000017299	Tcp1	281.38	2.6499	-6.2736	7.038e-05	0.99993	0.00014076	0.0013893
GATGTAACCATTACTAACGA	000017300	Tcp1	137.32	33.431	-2.0062	0.022738	0.97726	0.045476	0.12302
AATTGGACCAAATTAGACAG	000017298	Tcp1	199.11	89.148	-1.1504	0.055082	0.94492	0.11016	0.23416
GGAGGCCCAAGAGAACAAGC	000072590	Gm9758	107.57	3.7145	-4.5253	0.0024481	0.99755	0.0048962	0.023004
GTTCTCTCTCCCATCCACAT	000072591	Gm9758	149.36	6.6249	-4.3016	0.0018736	0.99813	0.0037473	0.018778
GGAGGCCCAAGAGAACAAGC	000072590	Gm9758	65.527	3.9749	-3.7412	0.0081907	0.99181	0.016381	0.05716
GTTCTCTCTCCCATCCACAT	000072591	Gm9758	43.484	2.7859	-3.5546	0.011964	0.98804	0.023928	0.076016
AAGCACGTAGGCCCGCACGA	000017654	Timeless	185.98	9.2748	-4.1857	0.0013711	0.99863	0.0027423	0.014802
CACTGAGGTGAATTGCCCAA	000017656	Timeless	305.47	18.55	-3.9705	0.00046293	0.99954	0.00092586	0.0064061
CCGCATCAAAGGGAACGACG	000017657	Timeless	159	10.6	-3.7859	0.0027028	0.9973	0.0054057	0.024789
AGGTCTCGAAGGAATGAGCG	000017655	Timeless	335.34	26.499	-3.6125	0.00049574	0.9995	0.00099148	0.0067554
ACACTGAATGGTCCCGACGG	000032674	Ncapd2	273.67	14.575	-4.1404	0.0005473	0.99945	0.0010946	0.0073015
ACTTGAGAAGAACGCCACTG	000032675	Ncapd2	490.53	118.86	-2.0359	0.0014914	0.99851	0.0029828	0.015784
ACACTGAATGGTCCCGACGG	000032674	Ncapd2	310.49	86.362	-1.8341	0.0075965	0.9924	0.015193	0.054046
ATGAGAACACAACTACAGGT	000032676	Ncapd2	22.163	6.6249	-1.6031	0.092308	0.90769	0.18462	0.33759
TGGCTGACTACTAACCATGC	000014879	Rpl18	115.2	0	-6.8604	0.00047844	0.99952	0.00095688	0.0065759
TGTGACCGTCCCCACAACCA	000014880	Rpl18	0.76288	54.789	4.984	1	7.0911e-171	1.4182e-170	3.9479e-167
TTACCTTGACAAGCAGCCGC	000014881	Rpl18	96.363	2.6499	-4.7374	0.0022351	0.99776	0.0044702	0.021476
TTACCTTGACAAGCAGCCGC	000014881	Rpl18	64.082	2.7859	-4.1036	0.0058043	0.9942	0.011609	0.044206
CGGTGTTCGGGAACCCCCGG	000022244	Pdcd7	351.69	6.5004	-5.5553	6.6854e-05	0.99993	0.00013371	0.0013312
ATGTGGGCGAGGCGCGACGG	000022242	Pdcd7	157.15	9.2863	-3.9425	0.0023847	0.99762	0.0047694	0.022554
ATGTGGGCGAGGCGCGACGG	000022242	Pdcd7	67.454	9.2748	-2.736	0.020911	0.97909	0.041821	0.11561
GTTCCGCTTTGCGTTTGGTG	000022245	Pdcd7	273.88	95.648	-1.508	0.018134	0.98187	0.036267	0.10409
ACAGGCTAAACGCACCAAGA	000014922	Rpl37a	67.897	0	-6.1064	0.0016308	0.99837	0.0032617	0.016896
TCCGGAGGGAGGCACCATAG	000014925	Rpl37a	21.361	0.92863	-3.5353	0.011036	0.98896	0.022072	0.071549
TCCGGAGGGAGGCACCATAG	000014925	Rpl37a	38.545	2.6499	-3.4375	0.01389	0.98611	0.02778	0.085062
ACAGGCTAAACGCACCAAGA	000014922	Rpl37a	29.872	2.6499	-3.0804	0.020787	0.97921	0.041574	0.11512
GCTGGGGGCCAACCGCGCCG	000031180	Spc24	195.3	1.8573	-6.1023	0.00019825	0.9998	0.00039649	0.0032577
GCTGGGGGCCAACCGCGCCG	000031180	Spc24	86.726	3.9749	-4.1403	0.0044531	0.99555	0.0089061	0.036123
AGATGCAGGACGGCGCCTAC	000031178	Spc24	130.09	9.2748	-3.6734	0.0041888	0.99581	0.0083776	0.034503
AGATGCAGGACGGCGCCTAC	000031178	Spc24	134.27	15.787	-3.0104	0.0075955	0.9924	0.015191	0.05404
AAGAAGCTAGTTCTACGGGA	000077236	Mup16	58.781	1.325	-4.6844	0.0031363	0.99686	0.0062726	0.027716
TTCTGCATGGACACAGACTA	000077239	Mup16	102.14	3.9749	-4.3738	0.0030052	0.99699	0.0060104	0.026839
TTCTGCATGGACACAGACTA	000077239	Mup16	175.46	19.501	-3.1056	0.0043975	0.9956	0.008795	0.03577
GGAATGGCATACTATTATCC	000077238	Mup16	154.18	17.225	-3.09	0.0056279	0.99437	0.011256	0.043175
GGGATGCCGCTGAACGTACG	000010459	Mcm2	442.47	3.7145	-6.5556	1.0988e-05	0.99999	2.1976e-05	0.00027816
CCACGTAGAACGCGCCACAG	000010457	Mcm2	285.23	14.575	-4.1999	0.00045772	0.99954	0.00091545	0.0063494
GGGCATGAAGACATCAAGAG	000010460	Mcm2	231.92	13.001	-4.0562	0.00092851	0.99907	0.001857	0.010986
GGGATGCCGCTGAACGTACG	000010459	Mcm2	99.254	15.9	-2.5686	0.017495	0.98251	0.034989	0.10125
AAAGCCATTTACAAAAGAGG	000017447	Psmd2	198.35	1.8573	-6.1245	0.00018782	0.99981	0.00037564	0.0031175
CAGGAAGAACTGGCGTCATG	000017448	Psmd2	285.23	10.6	-4.625	0.00030846	0.99969	0.00061692	0.004646
AAAGCCATTTACAAAAGAGG	000017447	Psmd2	88.654	2.6499	-4.6184	0.002724	0.99728	0.005448	0.024923
CAGGAAGAACTGGCGTCATG	000017448	Psmd2	189.96	57.575	-1.7049	0.022536	0.97746	0.045072	0.1222
CATACATGGAAAGTATGGGA	000077581	Gm13157	236.09	6.6249	-4.9586	0.0003882	0.99961	0.0007764	0.0055784
GATACTAAGATGGATCTGAT	000077582	Gm13157	209.11	10.6	-4.179	0.0010644	0.99894	0.0021287	0.012195
CATACATGGAAAGTATGGGA	000077581	Gm13157	203.69	28.787	-2.7807	0.0046904	0.99531	0.0093809	0.037559
TAAATGGGACAAGCTTATCA	000077583	Gm13157	506.55	179.22	-1.4938	0.0053076	0.99469	0.010615	0.041312
AGAAATTGAGATGACGAGGA	000029330	Pmpca	364.25	17.225	-4.3249	0.00018028	0.99982	0.00036057	0.003018
AGAGCTCACACACATCATGG	000029331	Pmpca	448.09	23.85	-4.1757	9.2161e-05	0.99991	0.00018432	0.0017411
TCAGTGGCACAGTACACTGG	000029332	Pmpca	592	167.15	-1.8183	0.0013733	0.99863	0.0027467	0.014823
AGAGCTCACACACATCATGG	000029331	Pmpca	501.21	180.15	-1.4711	0.0058076	0.99419	0.011615	0.044222
TTCAGATCCAACACCAACAA	000073863	Cpsf6	866.3	38.424	-4.4594	1.787e-06	1	3.574e-06	5.4871e-05
ACGTTGTGTACACTTACACT	000073860	Cpsf6	1043.6	154.15	-2.7512	7.6587e-06	0.99999	1.5317e-05	0.00020212
CTAGCAGGACCTCCTAACCG	000073861	Cpsf6	501.98	74.29	-2.74	0.00035562	0.99964	0.00071125	0.0052
TTCAGATCCAACACCAACAA	000073863	Cpsf6	437.13	67.79	-2.6711	0.00066978	0.99933	0.0013396	0.0085362
AGTTTACCGAGGAGTCCGGG	000022938	Bysl	148.4	3.9749	-4.9083	0.0010793	0.99892	0.0021585	0.012321
TGAACAAGAATCCTCCCGTG	000022941	Bysl	71.308	3.9749	-3.8614	0.0068688	0.99313	0.013738	0.050091
TGAACAAGAATCCTCCCGTG	000022941	Bysl	83.154	5.5718	-3.6787	0.0071743	0.99283	0.014349	0.051772
GGGACCCGAGAAAAACGGCG	000022940	Bysl	63.599	5.2999	-3.3581	0.012056	0.98794	0.024111	0.076453
AGAGTGGGAAGATCATCACG	000033706	Cdan1	687.36	40.86	-4.0395	1.2624e-05	0.99999	2.5247e-05	0.00031489
TCCTCATGCAGGGTGAACGG	000033709	Cdan1	602.68	44.574	-3.7275	3.7703e-05	0.99996	7.5407e-05	0.00081795
TCCTCATGCAGGGTGAACGG	000033709	Cdan1	673.57	70.224	-3.2436	4.0827e-05	0.99996	8.1653e-05	0.00087597
TCATGGATGCTACGAAACAG	000033708	Cdan1	261.14	31.799	-2.9986	0.0020576	0.99794	0.0041152	0.020148
TGTCCATAAATAAAGATGGA	000020281	Orc5	115.96	8.3576	-3.6437	0.0050743	0.99493	0.010149	0.03993
ACACAATTCACAAAGGCATG	000020279	Orc5	555.38	98.434	-2.4843	0.00037428	0.99963	0.00074856	0.0054178
ATACTCTGGAGGATGATCAT	000020280	Orc5	927.67	168.08	-2.4574	3.3316e-05	0.99997	6.6632e-05	0.00073376
ATACTCTGGAGGATGATCAT	000020280	Orc5	714.05	267.64	-1.4123	0.0027157	0.99728	0.0054314	0.02487
TCACTTACCACAACAGACCG	000028909	Ccnh	167.83	9.2863	-4.0368	0.0019336	0.99807	0.0038672	0.019217
CAGTAATGGAATATCACCCT	000028907	Ccnh	563.72	41.074	-3.7465	5.1582e-05	0.99995	0.00010316	0.0010679
CAAATTCAAGTGCAAAGCTG	000028906	Ccnh	112.74	9.2748	-3.4686	0.0062088	0.99379	0.012418	0.046477
GGTTTACCTTTATATCGATG	000028908	Ccnh	201.4	63.147	-1.6578	0.022344	0.97766	0.044688	0.12144
GCAATCTTATAGTCATACCT	000023735	Paf1	295.83	7.9498	-5.0516	0.00018752	0.99981	0.00037504	0.0031134
TGTGAAACAGCAGTTCACAG	000023737	Paf1	128.16	6.6249	-4.0823	0.0029301	0.99707	0.0058603	0.026316
AGCATGCAAAGGTGGTACCG	000023734	Paf1	180.2	11.925	-3.8094	0.0020792	0.99792	0.0041584	0.020312
GCCCCGAGTGACACCAGTGG	000023736	Paf1	186.94	21.2	-3.0817	0.0039902	0.99601	0.0079803	0.033265
TGACAACCATAAGTGGACCC	000025364	Supt20	1363.5	180.2	-2.9128	7.0238e-07	1	1.4048e-06	2.3588e-05
AGGAGATCCACCAAAATAGG	000025363	Supt20	1537	262.34	-2.546	7.9051e-07	1	1.581e-06	2.6252e-05
ACGACTCACAGCCAACAATG	000025362	Supt20	1127.4	198.75	-2.4981	9.0019e-06	0.99999	1.8004e-05	0.0002332
TGACAACCATAAGTGGACCC	000025364	Supt20	1219.9	228.44	-2.4117	6.9252e-06	0.99999	1.385e-05	0.00018505
GAACCTTCAGCGGAAACATG	000048470	Wdr74	140.69	6.6249	-4.2159	0.0022407	0.99776	0.0044813	0.021513
GGGAGACTGGATCATAGACA	000048471	Wdr74	163.82	7.9498	-4.2029	0.0017372	0.99826	0.0034745	0.017723
ATGAGTGTTCCCTACGATGA	000048468	Wdr74	226.45	17.225	-3.6416	0.0014715	0.99853	0.0029431	0.015632
CGTGAGGTACTTTAATGCTG	000048469	Wdr74	146.47	17.225	-3.0165	0.0066017	0.9934	0.013203	0.048611
CAGCGGGTACAAGATCTACC	000032468	Rpl24	46.536	0	-5.5709	0.0033392	0.99666	0.0066783	0.029055
CTACGCCAGGACCGACGGGA	000032469	Rpl24	90.02	0.92863	-5.5605	0.00088042	0.99912	0.0017608	0.010535
CTACGCCAGGACCGACGGGA	000032469	Rpl24	82.872	3.9749	-4.0754	0.0049415	0.99506	0.009883	0.039103
ACAGTCCAGTTTATCTGCCG	000032466	Rpl24	135.87	11.925	-3.4046	0.0050578	0.99494	0.010116	0.039832
ATTCCTGATGAATTCGACAG	000028575	Timm50	596.48	33.124	-4.13	2.4926e-05	0.99998	4.9851e-05	0.00057042
ATTCCTGATGAATTCGACAG	000028575	Timm50	559.96	70.576	-2.9703	0.00015432	0.99985	0.00030863	0.002658
ACTGGTCCTGGAGCTTACCG	000028574	Timm50	823.9	176.22	-2.2187	0.00011889	0.99988	0.00023778	0.0021468
GACGCCACCAGATATATGGA	000028576	Timm50	234.21	66.861	-1.7933	0.014084	0.98592	0.028168	0.085987
ACAGTATGAGCAATGATGTG	000024646	Letm1	899.06	59.624	-3.8921	2.7499e-06	1	5.4999e-06	8.1104e-05
TGACCCTGGATAACCTCACG	000024649	Letm1	423.03	31.799	-3.6924	0.00019565	0.9998	0.0003913	0.0032237
TGACCCTGGATAACCTCACG	000024649	Letm1	441.71	113.29	-1.9536	0.0024614	0.99754	0.0049229	0.023102
ATCACAGAGTCCTCTCCTAG	000024647	Letm1	423.03	129.85	-1.6963	0.0049433	0.99506	0.0098865	0.03911
CAATGTCAGAGTCGGCACCA	000022171	Exosc10	58.781	1.325	-4.6844	0.0031363	0.99686	0.0062726	0.027716
CATGATGCTAAAGATAGCTG	000022172	Exosc10	152.25	6.6249	-4.3291	0.0017672	0.99823	0.0035343	0.017954
CAATGTCAGAGTCGGCACCA	000022171	Exosc10	70.185	2.7859	-4.2329	0.0048144	0.99519	0.0096287	0.038333
TCATACTCGTCACCGAACTG	000022173	Exosc10	119.01	13.929	-3.0069	0.009031	0.99097	0.018062	0.061586
GAGCCGCTTTCATTAAGGTG	000024748	Pdcd10	420.14	14.575	-4.757	6.8821e-05	0.99993	0.00013764	0.0013644
CATGTATCCTGTGTTTAATG	000024747	Pdcd10	868.23	38.424	-4.4626	1.7532e-06	1	3.5063e-06	5.3978e-05
TATCAGAGTACATGATTGAG	000024749	Pdcd10	472.22	84.505	-2.4684	0.00071578	0.99928	0.0014316	0.0089803
CATGTATCCTGTGTTTAATG	000024747	Pdcd10	852.9	185.73	-2.1932	0.0001077	0.99989	0.00021539	0.0019767
TGTCATGCAACATCCTCCAA	000022989	Timm23	83.154	2.7859	-4.4743	0.0033287	0.99667	0.0066574	0.028998
CCGATACTCACGCGGGACGC	000022987	Timm23	342.53	30.645	-3.4404	0.00055893	0.99944	0.0011179	0.0074221
TGTCATGCAACATCCTCCAA	000022989	Timm23	98.29	10.6	-3.0975	0.010445	0.98956	0.020889	0.068716
ACAAGATTTATACTTACCCA	000022986	Timm23	508.84	104.93	-2.2669	0.00080538	0.99919	0.0016108	0.0098376
CACTGTAGGGCACCTCACGA	000068552	Rpl13	132.98	2.6499	-5.198	0.00096147	0.99904	0.0019229	0.011286
GGCTGGCATCCACAAGAAAG	000068554	Rpl13	192.25	41.788	-2.1752	0.011165	0.98884	0.022329	0.072148
GGAACAGGATGAGCTTGGAG	000068553	Rpl13	2.8909	0	-1.9601	0.096068	0.90393	0.19214	0.34714
TACCTGCGGATCTTGCGCGC	000068555	Rpl13	324.74	99.373	-1.6984	0.0090046	0.991	0.018009	0.061449
TGACTGCTGATATCCGACAG	000001280	Atp6v1a	391.23	19.875	-4.2319	0.00015094	0.99985	0.00030188	0.0026093
AGTCGGCCATCATACTGACG	000001277	Atp6v1a	191.76	10.6	-4.0546	0.0014503	0.99855	0.0029006	0.015464
ATGTTGCCCCCACGTAACAG	000001278	Atp6v1a	407.38	40.86	-3.2863	0.00036526	0.99963	0.00073051	0.0053154
AGTCGGCCATCATACTGACG	000001277	Atp6v1a	210.56	65.932	-1.6603	0.020846	0.97915	0.041692	0.11536
TCAGCCGCATGACATGAAAG	000034789	Psmg4	839.17	148.58	-2.4898	5.3504e-05	0.99995	0.00010701	0.0011009
GCATCTACGCAACCTCGCAG	000034788	Psmg4	999.38	271.16	-1.878	0.00013742	0.99986	0.00027484	0.0024189
ACTTCTGATACAACTTCCAC	000034786	Psmg4	813.23	253.51	-1.6777	0.00068443	0.99932	0.0013689	0.0086786
ACTTCTGATACAACTTCCAC	000034786	Psmg4	970.37	337.87	-1.5193	0.0006385	0.99936	0.001277	0.0082374
TCGAGTCATCGCTCCCAAGA	000047243	D8Ertd738e	150.29	1.8573	-5.7265	0.00046272	0.99954	0.00092543	0.0064041
CGGGCCTCGGAAAGGCGGTA	000047240	D8Ertd738e	80.103	0.92863	-5.3941	0.0011472	0.99885	0.0022945	0.012922
CGGGCCTCGGAAAGGCGGTA	000047240	D8Ertd738e	36.618	0	-5.2333	0.0049945	0.99501	0.0099889	0.039429
TCAGCAGCAGAAGTTGAAGA	000047242	D8Ertd738e	106.96	3.9749	-4.4397	0.002675	0.99732	0.0053501	0.02459
GGGCTGTCCCGCCGCCTACG	000005316	F8a	1059	102.02	-3.3631	1.9181e-06	1	3.8362e-06	5.8496e-05
GGGCTGTCCCGCCGCCTACG	000005316	F8a	1608.2	498.67	-1.6873	2.5005e-05	0.99997	5.001e-05	0.00057191
CATGCGTGTAAATAGCGCCA	000005315	F8a	1142.9	406.77	-1.4881	0.00038	0.99962	0.00076	0.0054844
CATGCGTGTAAATAGCGCCA	000005315	F8a	1187	453.17	-1.3873	0.00052969	0.99947	0.0010594	0.0071147
TGCTTGTATGAACTCTTGCA	000056966	Dars	175.38	2.6499	-5.5947	0.00041346	0.99959	0.00082692	0.0058568
AACAAAGGAGGCATACCCTA	000056964	Dars	190.8	11.925	-3.8914	0.0017084	0.99829	0.0034168	0.017491
TTGACGTAGAAGGTGTTGTG	000056967	Dars	224.52	22.525	-3.261	0.0022212	0.99778	0.0044425	0.021372
TGCTTGTATGAACTCTTGCA	000056966	Dars	220.47	56.646	-1.9418	0.012333	0.98767	0.024665	0.077803
GGGTACTGATGCGATCGTAG	000042007	Pik3r4	339.2	7.9498	-5.2484	9.9925e-05	0.9999	0.00019985	0.0018607
CTGGCGAACTCGTAGACATG	000042006	Pik3r4	356.54	18.55	-4.1929	0.00022139	0.99978	0.00044278	0.0035595
TAGATATTGACATCGTTGCG	000042008	Pik3r4	383.73	179.22	-1.094	0.027723	0.97228	0.055446	0.14242
CTGGCGAACTCGTAGACATG	000042006	Pik3r4	461.54	260.02	-0.82546	0.047364	0.95264	0.094729	0.21033
ATATGCTGAAACAAACAGGA	000026435	Psmd14	218.74	5.2999	-5.1243	0.00040411	0.9996	0.00080821	0.0057563
AGACAAACGACTTCAAATCT	000026434	Psmd14	450.86	69.647	-2.6772	0.00059334	0.99941	0.0011867	0.0077788
ATTAGACCCATAACTTCCAT	000026436	Psmd14	215.13	49.217	-2.1057	0.010091	0.98991	0.020183	0.06694
AGACAAACGACTTCAAATCT	000026434	Psmd14	653.34	335.22	-0.96064	0.017868	0.98213	0.035735	0.10291
GAATAGGAGGCTTCTCAATG	000072364	Med19	476.04	74.29	-2.6636	0.0004959	0.9995	0.0009918	0.006757
GAGGCGGAAACCAGACAGCA	000072365	Med19	433.63	79.498	-2.4328	0.0010252	0.99897	0.0020505	0.011854
TTTAATCACACACTACAACC	000072367	Med19	1141.3	230.3	-2.3041	1.5102e-05	0.99998	3.0204e-05	0.00036804
GAGGCGGAAACCAGACAGCA	000072365	Med19	764.41	258.16	-1.5624	0.0012837	0.99872	0.0025674	0.014091
TGAGCATGAGTACGTGCACG	000018784	Vrk1	432.67	29.149	-3.8464	0.00015078	0.99985	0.00030156	0.0026077
TGAGCATGAGTACGTGCACG	000018784	Vrk1	713.3	122.58	-2.5311	0.00011179	0.99989	0.00022358	0.0020393
ACCAGCATCGACGCTCACAA	000018782	Vrk1	775.85	156.01	-2.3068	0.00012606	0.99987	0.00025213	0.0022508
ACCAGCATCGACGCTCACAA	000018782	Vrk1	1313.4	402.79	-1.7027	7.1795e-05	0.99993	0.00014359	0.0014133
CACGCGCAACCGCCACTCGG	000034979	1810026J23Rik	236.09	13.25	-4.0564	0.00088714	0.99911	0.0017743	0.010599
GGACTACGCTGAGGCGTGCG	000034980	1810026J23Rik	297.76	18.55	-3.9338	0.00051978	0.99948	0.0010396	0.0070132
GGCCAACGAAACCCACGTCG	000034981	1810026J23Rik	415.01	179.22	-1.2068	0.01797	0.98203	0.035939	0.10336
GGCCAACGAAACCCACGTCG	000034981	1810026J23Rik	470.25	204.05	-1.2005	0.014588	0.98541	0.029175	0.088219
GAATGGGTTCTTGGTAAACA	000013843	Psma2	297.76	11.925	-4.5308	0.00029449	0.99971	0.00058898	0.0044747
TTACCTTTAATCCCCACTGA	000013844	Psma2	274.63	18.55	-3.8175	0.00074175	0.99926	0.0014835	0.0092288
CACATCGGTTTGGTGTACAG	000013842	Psma2	97.326	7.9498	-3.4576	0.0075001	0.9925	0.015	0.053517
TTACCTTTAATCCCCACTGA	000013844	Psma2	376.86	58.503	-2.6668	0.0011122	0.99889	0.0022244	0.012611
AGTCCCACACCAGCACTCGG	000001781	Bub3	160.93	1.325	-6.122	0.00026447	0.99974	0.00052895	0.0041061
GTTGGGGCTGAACTTAACCG	000001784	Bub3	74.199	2.6499	-4.3648	0.0040545	0.99595	0.0081089	0.03367
ATGTGCCCGCCAATTCCATG	000001782	Bub3	475.07	84.798	-2.4721	0.00069581	0.9993	0.0013916	0.0087879
GTTGGGGCTGAACTTAACCG	000001784	Bub3	31.278	88.219	1.4668	0.99661	0.0033882	0.0067763	0.029366
AACACAATCAGGTCAATTCG	000028662	Cenpm	443.27	18.55	-4.5062	6.9594e-05	0.99993	0.00013919	0.0013766
AACAGGGCTACCGTCTTGGT	000028663	Cenpm	115.64	6.6249	-3.9351	0.0038838	0.99612	0.0077675	0.032581
AGCAACTTACACCCTCAGCT	000028664	Cenpm	425.92	49.024	-3.0933	0.00039714	0.9996	0.00079428	0.0056806
GTGTGCTTCCTTGTCACAGG	000028665	Cenpm	447.12	113.95	-1.9629	0.0023281	0.99767	0.0046562	0.022157
AGAGGCACACTTCCACCTCA	000039262	Mrgbp	1277.8	66.249	-4.2491	1.022e-07	1	2.0441e-07	4.0608e-06
TGTCGTACATAGTGCTCAGA	000039264	Mrgbp	911.59	71.549	-3.6529	3.499e-06	1	6.9979e-06	0.00010058
TGTCTCGGATACAAATCATG	000039265	Mrgbp	755.48	182.85	-2.0408	0.00029191	0.99971	0.00058383	0.0044437
ATCATTCAGGAAGTCCGAGA	000039263	Mrgbp	562.24	167.15	-1.744	0.0019832	0.99802	0.0039665	0.019586
TGCCACATCAACTCACACTG	000049186	Atad3a	662.98	42.399	-3.9354	1.754e-05	0.99998	3.5081e-05	0.00042037
AAGCAGGAGGCCATACGGCG	000049184	Atad3a	364.25	26.499	-3.7314	0.00032862	0.99967	0.00065723	0.0048893
TTACCTGATAGACTCCAAGA	000049187	Atad3a	481.38	75.219	-2.662	0.00047664	0.99952	0.00095328	0.006556
TGCCACATCAACTCACACTG	000049186	Atad3a	1072.6	234.01	-2.1917	3.1675e-05	0.99997	6.335e-05	0.00070258
ATTGCTATGATGAAACCCAA	000035383	Smc4	104.51	4.6431	-4.2248	0.0033701	0.99663	0.0067402	0.029246
TTAACTAGATCAAATAACCG	000035384	Smc4	86.726	3.9749	-4.1403	0.0044531	0.99555	0.0089061	0.036123
TTAGCAATGAATCGAAGTAG	000035385	Smc4	154.18	11.925	-3.5857	0.0034515	0.99655	0.0069031	0.029791
ACGAGACATGAGAAATACAC	000035382	Smc4	244.76	19.875	-3.5574	0.0013189	0.99868	0.0026379	0.014379
TGAGTTCAGACATCAAGGAA	000011108	Mup1	114.67	6.6249	-3.9232	0.0039714	0.99603	0.0079427	0.033138
AGAGTGCTCGGAATTATCTA	000011105	Mup1	279.98	37.145	-2.8809	0.0019791	0.99802	0.0039581	0.019558
AGAGTGCTCGGAATTATCTA	000011105	Mup1	342.09	52.999	-2.6676	0.0014973	0.9985	0.0029946	0.015832
GCACAACTATGTGAGAAGCA	000011107	Mup1	66.49	10.6	-2.5406	0.02556	0.97444	0.051121	0.13417
GAGCTGAGAGCATTGACTGA	000077519	Gm3286	225.81	0	-7.8254	5.7589e-05	0.99994	0.00011518	0.0011708
GAGCTGAGAGCATTGACTGA	000077519	Gm3286	52.036	3.9749	-3.4142	0.01284	0.98716	0.025679	0.080146
CTTTCCACGATCTCCCTGTG	000077518	Gm3286	712.12	119.25	-2.5681	0.00010405	0.9999	0.00020809	0.0019227
AGCTGGCAGCTCCTCCAGAG	000077517	Gm3286	475.28	149.51	-1.662	0.0039846	0.99602	0.0079691	0.033229
GACTACCAGCTGTACGCCAG	000047299	Taf5l	1660.8	233.09	-2.8276	1.6005e-07	1	3.201e-07	6.1171e-06
AGAATCTGGTTGTGCCAATG	000047297	Taf5l	2195.1	514.09	-2.0921	2.734e-07	1	5.468e-07	9.9967e-06
ACAGAGATGAAGATTCTGCG	000047296	Taf5l	1657.7	401.17	-2.0442	3.3557e-06	1	6.7114e-06	9.6837e-05
AGAATCTGGTTGTGCCAATG	000047297	Taf5l	1683.7	577.61	-1.5418	4.3711e-05	0.99996	8.7422e-05	0.00092853
TGAGCGTCAAGACCCAGTCG	000002899	Socs3	665.87	23.85	-4.7461	7.1438e-06	0.99999	1.4288e-05	0.00019025
TTGAGTACACAGTCGAAGCG	000002900	Socs3	556.98	55.649	-3.3001	9.7126e-05	0.9999	0.00019425	0.001819
ACTTCGGACGAGGGTTCCGT	000002897	Socs3	1053.5	399.31	-1.3974	0.00079792	0.9992	0.0015958	0.0097619
TTGAGTACACAGTCGAAGCG	000002900	Socs3	654.55	262.8	-1.3133	0.0048949	0.99511	0.0097898	0.038825
GCATGTCCTGATTCACACCG	000028729	Gtf3a	233.44	2.7859	-5.9525	0.000158	0.99984	0.00031599	0.002712
AAACCCACAAAAACAGTATG	000028726	Gtf3a	286.2	18.55	-3.8768	0.00061995	0.99938	0.0012399	0.0080435
GCATGTCCTGATTCACACCG	000028729	Gtf3a	106.96	11.925	-3.0623	0.0097934	0.99021	0.019587	0.065457
GCACCTATGCAAACACACGG	000028728	Gtf3a	100.22	22.525	-2.1052	0.028543	0.97146	0.057086	0.14552
GCAGCGCCACGGTGCCGGGA	000067750	Hist1h3f	164.78	0.92863	-6.4256	0.00017058	0.99983	0.00034117	0.0028854
GCAGCGCCACGGTGCCGGGA	000067750	Hist1h3f	155.14	5.2999	-4.6314	0.0012949	0.99871	0.0025897	0.014183
AGGTTTCTTCACGCCGCCGG	000067748	Hist1h3f	382.56	26.499	-3.802	0.00025511	0.99974	0.00051022	0.0039912
CCGTGGCGCTGCGCGAGATC	000067749	Hist1h3f	520.29	155.08	-1.7398	0.0025338	0.99747	0.0050677	0.02361
CTGGAACTGCGGTCACGCAA	000046993	Hscb	193.69	9.2748	-4.244	0.0011912	0.99881	0.0023824	0.013302
CTTATAGGCATCATTCACCA	000046994	Hscb	413.4	29.149	-3.7808	0.00019428	0.99981	0.00038856	0.0032046
CTTATAGGCATCATTCACCA	000046994	Hscb	563.01	145.79	-1.9419	0.0011782	0.99882	0.0023564	0.013193
GGCTGAAGTAGTCACGAGTG	000046995	Hscb	178.51	67.79	-1.3838	0.040967	0.95903	0.081934	0.18953
GATATTACCACTAGTCTCCG	000038747	Dis3	229.34	6.6249	-4.9169	0.00043408	0.99957	0.00086817	0.0060897
AATTCGGATAGAAACCAGAC	000038746	Dis3	112.91	3.7145	-4.5946	0.0021595	0.99784	0.004319	0.020906
GGATACCAGCCTTCACGTGT	000038749	Dis3	273.67	15.9	-4.0226	0.00061272	0.99939	0.0012254	0.0079738
AATTCGGATAGAAACCAGAC	000038746	Dis3	170.56	11.925	-3.7305	0.0024976	0.9975	0.0049952	0.023364
CCTATTTACTTACAGCGCTG	000026627	Rbm8a	167.07	3.7145	-5.1558	0.0006941	0.99931	0.0013882	0.0087732
ACTCACCGGAGCCAAAGCCG	000026626	Rbm8a	210.07	7.9498	-4.5597	0.00074286	0.99926	0.0014857	0.009239
GCGGGAGGATTACGACAGTG	000026629	Rbm8a	36.618	1.325	-4.0161	0.0072229	0.99278	0.014446	0.052045
GCGGGAGGATTACGACAGTG	000026629	Rbm8a	12.969	0.92863	-2.8566	0.020722	0.97928	0.041444	0.11487
ACAGTACCTACCTAATTCCG	000010481	Anapc1	328.6	18.55	-4.0755	0.00032947	0.99967	0.00065894	0.0048983
ACAGTACCTACCTAATTCCG	000010481	Anapc1	201.4	25.073	-2.9566	0.0039308	0.99607	0.0078617	0.032885
TATCCATGACTATTTGACCA	000010484	Anapc1	990.22	197.8	-2.3179	3.3838e-05	0.99997	6.7675e-05	0.00074354
TATCCATGACTATTTGACCA	000010484	Anapc1	701.52	268.97	-1.3797	0.0032108	0.99679	0.0064217	0.028206
ATTTCAAGAGATTCTATGCT	000022310	Ccnc	2613.6	520.96	-2.3246	1.347e-08	1	2.6941e-08	6.2799e-07
GTTTCTGGCATCCAAAGTAG	000022311	Ccnc	1486.9	397.45	-1.9008	1.3785e-05	0.99999	2.757e-05	0.00034004
GTTTCTGGCATCCAAAGTAG	000022311	Ccnc	1623.7	466.39	-1.7975	1.3124e-05	0.99999	2.6248e-05	0.00032581
TGGTCTAGTTACCATGCAAG	000022313	Ccnc	948.21	299.44	-1.6596	0.00039752	0.9996	0.00079504	0.0056843
ATTTCACGTACTGGTGAAGG	000057468	Nup214	177.31	5.2999	-4.8229	0.00084462	0.99916	0.0016892	0.0102
GTATTCACTAGACATCATGC	000057471	Nup214	219.71	9.2748	-4.4249	0.00075451	0.99925	0.001509	0.0093428
GCAACTAAAACAGTAAAGCA	000057470	Nup214	212.96	11.925	-4.0491	0.001151	0.99885	0.0023019	0.012951
ATTTCACGTACTGGTGAAGG	000057468	Nup214	165.55	29.716	-2.4389	0.010241	0.98976	0.020483	0.067729
GGTATCATTTACTTTGAACG	000033273	Gtf2f2	202.36	9.2748	-4.3069	0.00102	0.99898	0.00204	0.011805
CCAAACAGAACACCGGCGTG	000033272	Gtf2f2	386.78	59.432	-2.6819	0.00099991	0.999	0.0019998	0.011631
CAAGATAAACTGTCATTGGA	000033271	Gtf2f2	648.45	104.01	-2.6287	0.00014382	0.99986	0.00028765	0.0025108
GGTATCATTTACTTTGAACG	000033273	Gtf2f2	120.54	52.003	-1.1972	0.078424	0.92158	0.15685	0.30099
CATGCATGAGAAGTCCATGG	000018967	Gm4836	144.54	5.2999	-4.53	0.0016048	0.9984	0.0032096	0.016693
GAACAAGAAAAATCAGTGGT	000018968	Gm4836	140.69	9.2748	-3.7855	0.0033363	0.99666	0.0066727	0.029045
GAACAAGAAAAATCAGTGGT	000018968	Gm4836	93.072	6.5004	-3.6487	0.0065872	0.99341	0.013174	0.048527
CATGCATGAGAAGTCCATGG	000018967	Gm4836	31.278	1.8573	-3.4979	0.013209	0.98679	0.026417	0.081864
ACAGCCTACCAAGAGGCCAG	000005129	Erh	216.82	3.9749	-5.4523	0.00030486	0.9997	0.00060973	0.0046015
ACAGCCTACCAAGAGGCCAG	000005129	Erh	166.31	11.144	-3.7843	0.0024909	0.99751	0.0049817	0.023317
CTGGCTGATATCGTATGTGA	000005131	Erh	405.85	48.289	-3.0452	0.00050578	0.99949	0.0010116	0.0068583
ATACTTACACCAGACAGCTG	000005130	Erh	154.1	34.359	-2.1331	0.016633	0.98337	0.033266	0.097509
AACTACATAAATCCGCACAA	000015067	Rrm1	122.38	1.325	-5.7298	0.0005865	0.99941	0.001173	0.007707
AACTACATAAATCCGCACAA	000015067	Rrm1	133.5	2.7859	-5.1509	0.0010027	0.999	0.0020055	0.011657
CCCAGCGATGTAGCTACCAG	000015069	Rrm1	180.2	6.6249	-4.5707	0.0010294	0.99897	0.0020589	0.011892
CCCAGCGATGTAGCTACCAG	000015069	Rrm1	54.165	7.429	-2.7103	0.024677	0.97532	0.049354	0.13069
CTATCAAAACGAGATCTCCG	000056490	Srsf7	280.42	17.225	-3.9487	0.00061334	0.99939	0.0012267	0.007979
TCCACAAAGGCGAATCCTGG	000056491	Srsf7	182.13	14.575	-3.5556	0.0025972	0.9974	0.0051943	0.024046
AAAGGGCATTCAGTTACTAT	000056488	Srsf7	497.4	72.433	-2.7628	0.00035527	0.99964	0.00071055	0.0051958
TCCACAAAGGCGAATCCTGG	000056491	Srsf7	253.28	92.863	-1.4378	0.023553	0.97645	0.047106	0.12629
GCTACCTGAACCCTTCCAGT	000054733	Ccm2	247.94	5.5718	-5.2434	0.00026371	0.99974	0.00052742	0.0040969
GCTACCTGAACCCTTCCAGT	000054733	Ccm2	343.05	19.875	-4.0428	0.00029401	0.99971	0.00058802	0.0044687
ACAGCAGCGATATCATGGAT	000054732	Ccm2	643.11	39.002	-4.0092	1.9049e-05	0.99998	3.8098e-05	0.0004516
TGCTCGGTCCAGAAAGTCGA	000054735	Ccm2	511.89	73.361	-2.786	0.00030469	0.9997	0.00060939	0.0046
CCCTCCGCCGCATCTATGAG	000040299	Katnb1	447.12	25.174	-4.0977	0.00010077	0.9999	0.00020155	0.0018737
GGACGAGCGAGAGTCCCGGG	000040300	Katnb1	206.22	15.9	-3.6161	0.0018783	0.99812	0.0037566	0.018816
AGGCCACAAATTCACCATAG	000040298	Katnb1	694.77	143.1	-2.2716	0.00022955	0.99977	0.00045909	0.0036698
TCATACAGGGCCTGTCAATG	000040301	Katnb1	941.46	439.89	-1.096	0.0045884	0.99541	0.0091769	0.03694
ATGGTGTGGGAGTAGACATG	000002649	Cdk7	289.09	34.449	-3.0327	0.0015066	0.99849	0.0030133	0.015905
GATGTGTGTAAGCCCTATTG	000002651	Cdk7	340.25	88.219	-1.9354	0.0050938	0.99491	0.010188	0.040046
GATGTGTGTAAGCCCTATTG	000002651	Cdk7	379.67	157.67	-1.2625	0.018095	0.98191	0.036189	0.10391
ATGGTGTGGGAGTAGACATG	000002649	Cdk7	237.26	116.08	-1.025	0.059166	0.94083	0.11833	0.24618
CACCGCGTTCAGGTTGGCCG	000043100	Mzt1	487.6	29.149	-4.0184	7.5047e-05	0.99992	0.00015009	0.0014661
CAGCGTTTCCATATCTAAGC	000043101	Mzt1	364.25	33.124	-3.42	0.0004647	0.99954	0.00092939	0.0064254
GCGGTGAGGGAGACCATGGA	000043102	Mzt1	439.42	76.147	-2.5132	0.00085297	0.99915	0.0017059	0.010282
GCGGTGAGGGAGACCATGGA	000043102	Mzt1	623.47	169.6	-1.872	0.00099289	0.99901	0.0019858	0.011571
GAGATGAGTCTATCACACAG	000078601	Gm21637	39.67	0.92863	-4.3983	0.0043833	0.99562	0.0087665	0.035685
ATCATATTTAACCAGGTACA	000078599	Gm21637	262.11	15.9	-3.9606	0.00073531	0.99926	0.0014706	0.0091696
AAAAGTTATCGCCAAGAGGG	000078598	Gm21637	172.49	10.6	-3.9027	0.0020776	0.99792	0.0041552	0.020302
CTGCCCAAAAGGAACATCTT	000078600	Gm21637	598.41	46.374	-3.6614	4.2457e-05	0.99996	8.4914e-05	0.00090596
AACTGCGTGAGACCAAGCGC	000009889	Lmna	1242.1	115.27	-3.4184	4.9289e-07	1	9.8578e-07	1.7096e-05
GAGGAACAGCAACCTCGTGG	000009891	Lmna	677.44	117.94	-2.512	0.00014896	0.99985	0.00029793	0.0025822
AACTGCGTGAGACCAAGCGC	000009889	Lmna	1244.3	418.81	-1.5686	0.00017793	0.99982	0.00035587	0.0029861
GAGGAACAGCAACCTCGTGG	000009891	Lmna	342.09	117.92	-1.5286	0.011619	0.98838	0.023238	0.07437
AGTGTTCGAGGCTAATGAGT	000017668	Timm44	371.96	11.925	-4.8508	0.00010212	0.9999	0.00020425	0.0018945
AGAGCGTGCTTGGACAGACG	000017667	Timm44	213.61	7.429	-4.6702	0.000646	0.99935	0.001292	0.0083169
AGAGCGTGCTTGGACAGACG	000017667	Timm44	245.72	11.925	-4.2547	0.00066338	0.99934	0.0013268	0.0084757
AGTGTTCGAGGCTAATGAGT	000017668	Timm44	460.78	26.002	-4.0961	8.8735e-05	0.99991	0.00017747	0.0016868
GAGGCGGTACACGCAACTCA	000058471	Yrdc	236.09	10.6	-4.3533	0.00067266	0.99933	0.0013453	0.0085639
AGGCCGTAGAGCGTGTCGGT	000058468	Yrdc	151.05	7.429	-4.173	0.0020678	0.99793	0.0041356	0.020228
AGGCCGTAGAGCGTGTCGGT	000058468	Yrdc	86.726	6.6249	-3.5242	0.0079621	0.99204	0.015924	0.055942
CTGTCAGGTGAGAGTACCTA	000058469	Yrdc	611.83	210.8	-1.5328	0.0028479	0.99715	0.0056958	0.025771
GGATGGCGGTTGTAATCACA	000019421	Arih1	363.29	10.6	-4.9729	9.9858e-05	0.9999	0.00019972	0.0018604
GGATGGCGGTTGTAATCACA	000019421	Arih1	153.34	5.5718	-4.5537	0.0014199	0.99858	0.0028398	0.015203
CAGGACACCACTTTAACAGT	000019419	Arih1	299.69	18.55	-3.9431	0.00050488	0.9995	0.0010098	0.0068497
ATGTATCCGGGAGGTCAACG	000019418	Arih1	604.97	50.146	-3.5666	4.5339e-05	0.99995	9.0678e-05	0.00095774
CCTTCAAGTTGGCCTCGCGT	000021211	Tada1	2187.9	426.24	-2.3571	7.1695e-08	1	1.4339e-07	2.9411e-06
CCTTCAAGTTGGCCTCGCGT	000021211	Tada1	1541.8	331.24	-2.2152	2.6897e-06	1	5.3794e-06	7.946e-05
CCAAAATCTGACAACGTGTG	000021210	Tada1	1016.2	233.09	-2.1194	5.4412e-05	0.99995	0.00010882	0.0011169
TTTCCTTCTCGACACAACTG	000021213	Tada1	1651.6	594.32	-1.473	7.3003e-05	0.99993	0.00014601	0.0014332
GATTGTGGCTGGGCTAACCG	000046622	Anapc2	371.96	9.2748	-5.1818	7.5811e-05	0.99992	0.00015162	0.0014789
CTGCCACATCCTGCGCACAG	000046621	Anapc2	217.78	15.9	-3.6944	0.0015337	0.99847	0.0030673	0.016131
GTGGCCACACAATACCTGGG	000046623	Anapc2	101.18	10.6	-3.139	0.0097106	0.99029	0.019421	0.065034
CTGCCACATCCTGCGCACAG	000046621	Anapc2	260.91	59.432	-2.1157	0.0068057	0.99319	0.013611	0.049745
ACCTGCAGGGTATTCGACGT	000025502	Dolpp1	438.45	18.55	-4.4905	7.4022e-05	0.99993	0.00014804	0.0014497
CAACGACAAAAATAGGGCTG	000025504	Dolpp1	214.89	14.575	-3.793	0.0014378	0.99856	0.0028756	0.015357
TGACTCTCATCATATTCAAG	000025505	Dolpp1	527.1	46.374	-3.4787	9.8853e-05	0.9999	0.00019771	0.0018455
CAACGACAAAAATAGGGCTG	000025504	Dolpp1	262.43	151.37	-0.78989	0.090671	0.90933	0.18134	0.33344
GTTTGTTGGACGTTGTACAG	000058636	Tardbp	284.27	13.25	-4.3233	0.00041166	0.99959	0.00082332	0.0058381
TATGAGAGGAGTCCGACTGG	000058637	Tardbp	106.96	10.6	-3.2184	0.0084211	0.99158	0.016842	0.058389
TATGTTGTCAACTATCCCAA	000058638	Tardbp	395.94	72.433	-2.4344	0.0013735	0.99863	0.0027469	0.014823
GTTTGTTGGACGTTGTACAG	000058636	Tardbp	476.04	177.37	-1.4193	0.0075815	0.99242	0.015163	0.053961
GGTAGAGAGTCAGAGCATCT	000057665	Vps18	75.525	2.7859	-4.3372	0.0041182	0.99588	0.0082364	0.034068
GGTTGCGCTGAGTAGCACCG	000057666	Vps18	187.91	15.9	-3.4826	0.0026181	0.99738	0.0052362	0.024187
GGTTGCGCTGAGTAGCACCG	000057666	Vps18	260.14	35.288	-2.8473	0.0024924	0.99751	0.0049849	0.023326
TGGACGGAAGTAGAGATCTG	000057667	Vps18	1067.3	245.16	-2.1176	4.1771e-05	0.99996	8.3542e-05	0.00089325
AAGAAAGCAACTTACGCTGG	000013375	Pola1	160.21	4.6431	-4.8363	0.0010115	0.99899	0.0020231	0.011735
AAGAAAGCAACTTACGCTGG	000013375	Pola1	120.45	7.9498	-3.7624	0.0043109	0.99569	0.0086219	0.035227
AAAGAAAAAAAGATCTACTG	000013374	Pola1	180.2	22.525	-2.9453	0.0049596	0.99504	0.0099192	0.039215
TGTACAGAACCATCAACATG	000013377	Pola1	82.872	15.9	-2.3112	0.027147	0.97285	0.054293	0.14024
TGATGCATCATGCCTTACAT	000032217	Nutf2	86.969	0.92863	-5.5113	0.00095347	0.99905	0.0019069	0.011219
GTAGTAATGTTGAATAAAGC	000032216	Nutf2	233.2	13.25	-4.0387	0.00093093	0.99907	0.0018619	0.011009
GGGAAGGACAGCAGTTCCAG	000032215	Nutf2	52.999	2.6499	-3.887	0.0079451	0.99205	0.01589	0.055858
TGATGCATCATGCCTTACAT	000032217	Nutf2	57.818	3.9749	-3.5635	0.01051	0.98949	0.02102	0.069024
ACCACAGCGAACGATCACAG	000014490	Rbbp6	38.545	1.325	-4.0882	0.006645	0.99335	0.01329	0.048852
TGAGTGGACTGATATAGACA	000014493	Rbbp6	208.14	14.575	-3.7472	0.001618	0.99838	0.0032361	0.016788
TAAGAATTGCCCAACAAATG	000014492	Rbbp6	168.63	17.225	-3.2185	0.0042152	0.99578	0.0084305	0.034666
TGAGTGGACTGATATAGACA	000014493	Rbbp6	180.04	59.432	-1.5829	0.029336	0.97066	0.058672	0.14843
TCCTTGCGGATCATCCGGAA	000004092	Ddb1	592.63	27.824	-4.3642	2.0088e-05	0.99998	4.0177e-05	0.00047292
ATCTTGGAGTATAAGCAGAG	000004089	Ddb1	155.14	15.9	-3.2078	0.0049418	0.99506	0.0098835	0.039103
TATTGTGTGCCATAACCGGG	000004091	Ddb1	746.1	155.08	-2.259	0.00017138	0.99983	0.00034275	0.0028959
ATCTTGGAGTATAAGCAGAG	000004089	Ddb1	133.5	40.86	-1.684	0.035841	0.96416	0.071682	0.17209
CGAGCGCAGGGCCTTTCGTG	000003534	Crybb3	336.31	19.875	-4.0142	0.00032377	0.99968	0.00064755	0.0048296
CTGGACCAGGCATCCCAGCG	000003535	Crybb3	117.56	9.2748	-3.5285	0.0055495	0.99445	0.011099	0.042718
CGAGCGCAGGGCCTTTCGTG	000003534	Crybb3	472.99	207.08	-1.1877	0.014992	0.98501	0.029984	0.090117
TTACAATGTGCAAAGGACGG	000003536	Crybb3	504.94	223.92	-1.1696	0.014006	0.98599	0.028011	0.085621
ATCATGTGGATGAATCTGAT	000075829	4930467E23Rik	308.36	9.2748	-4.9121	0.00018622	0.99981	0.00037244	0.0030966
ATCATGTGGATGAATCTGAT	000075829	4930467E23Rik	215.9	8.3576	-4.5347	0.00071218	0.99929	0.0014244	0.0089436
TACCCCTGGATATAGCATGG	000075832	4930467E23Rik	159	7.9498	-4.1601	0.0019097	0.99809	0.0038194	0.019045
GACCCAGACATGAACGCCAC	000075831	4930467E23Rik	71.711	4.6431	-3.6876	0.0080776	0.99192	0.016155	0.056571
AGTTATGGCAGAGAACATGT	000022300	Hnrnpu	283.31	6.6249	-5.2206	0.00018411	0.99982	0.00036821	0.0030681
AGTTATGGCAGAGAACATGT	000022300	Hnrnpu	260.91	10.215	-4.5456	0.0004305	0.99957	0.00086099	0.00605
AACGGCAGTCTCGACCTAGG	000022298	Hnrnpu	141.65	19.875	-2.7727	0.0089734	0.99103	0.017947	0.061296
AACGGCAGTCTCGACCTAGG	000022298	Hnrnpu	276.93	118.86	-1.2133	0.032959	0.96704	0.065918	0.16177
TCATATCAGGAATTGTGCCT	000060162	Nae1	1134.2	151.05	-2.9003	3.0077e-06	1	6.0154e-06	8.7825e-05
CACAGCACTAAATACAACTC	000060160	Nae1	536.31	137.44	-1.9565	0.0013384	0.99866	0.0026767	0.014537
CACAGCACTAAATACAACTC	000060160	Nae1	1121.7	394.84	-1.5039	0.00038181	0.99962	0.00076363	0.0055048
TGTTTGCTTAATAAATGCAA	000060163	Nae1	1273.3	560.89	-1.1813	0.0012014	0.9988	0.0024027	0.013385
AGTGAGGTAGCGGATTTGAG	000027654	Med11	585.88	22.525	-4.6408	1.6143e-05	0.99998	3.2286e-05	0.00039052
CCTACAGTCTGGCGAACGAG	000027656	Med11	567.58	51.674	-3.4322	7.4226e-05	0.99993	0.00014845	0.0014535
AGTGAGGTAGCGGATTTGAG	000027654	Med11	417.3	121.65	-1.77	0.004318	0.99568	0.008636	0.03527
CCAAGGAAAAGACTAACGAG	000027655	Med11	388.31	125.36	-1.6233	0.0071796	0.99282	0.014359	0.051797
AGGGCAGCGCCATCATGCAG	000053096	Ints9	286.2	5.2999	-5.5106	0.0001375	0.99986	0.00027501	0.0024201
GGCATAGCCAGAGCTCAGAG	000053098	Ints9	236.09	13.25	-4.0564	0.00088714	0.99911	0.0017743	0.010599
GGCATAGCCAGAGCTCAGAG	000053098	Ints9	185.38	34.359	-2.3981	0.0088963	0.9911	0.017793	0.060877
ATTGATATAAGCACTCCAGG	000053097	Ints9	531.73	150.44	-1.8147	0.0019565	0.99804	0.003913	0.01939
CTACAAGATCCGGGAGATCG	000018119	Tpt1	214.89	11.925	-4.0621	0.0011131	0.99889	0.0022263	0.012619
ATCGATGACTCGCTCATCGG	000018118	Tpt1	346.91	22.525	-3.8865	0.00033133	0.99967	0.00066266	0.00492
ATCGATGACTCGCTCATCGG	000018118	Tpt1	308.2	71.504	-2.0924	0.0048662	0.99513	0.0097323	0.038643
GCTTCCGCTGAAGGTCCGGA	000018120	Tpt1	521.32	201.4	-1.3678	0.0071434	0.99286	0.014287	0.051604
CCCACCGCAAGATTGGAGAA	000038839	Tonsl	177.31	5.2999	-4.8229	0.00084462	0.99916	0.0016892	0.0102
CCCACCGCAAGATTGGAGAA	000038839	Tonsl	79.34	2.7859	-4.4074	0.0036973	0.9963	0.0073945	0.031367
CTGAATCCCCGAGACTACTG	000038840	Tonsl	389.31	27.824	-3.7592	0.00025028	0.99975	0.00050056	0.0039306
CAGGCGACTCTGCTTGACAC	000038838	Tonsl	325.71	30.474	-3.3757	0.00070796	0.99929	0.0014159	0.008903
CATGCAATAATCTGAGAGCA	000029794	Rbm25	387.54	2.7859	-6.6813	1.6515e-05	0.99998	3.3031e-05	0.00039847
TTTCTGAAGAGCACTACCCC	000029797	Rbm25	431.7	33.124	-3.6645	0.00018622	0.99981	0.00037244	0.0030966
CATGCAATAATCTGAGAGCA	000029794	Rbm25	63.599	136.47	1.0895	0.98584	0.014158	0.028317	0.08632
GAGTGGGTAAGGGATCAATG	000029795	Rbm25	472.18	237.17	-0.99039	0.027438	0.97256	0.054876	0.14132
TCAAACAAAGGAGTCCCGCT	000024229	Prpf40a	681.28	26.499	-4.6329	6.9919e-06	0.99999	1.3984e-05	0.00018669
ACCACACCTACTAATACTGT	000024226	Prpf40a	846.04	244.23	-1.7883	0.00039847	0.9996	0.00079693	0.0056957
ATCTGTGGCATCATTCCATG	000024227	Prpf40a	1145.9	382.59	-1.58	0.00024583	0.99975	0.00049166	0.0038739
TCAAACAAAGGAGTCCCGCT	000024229	Prpf40a	363.13	122.58	-1.559	0.0096177	0.99038	0.019235	0.064575
ACTCGGAGTTTGACCCACCG	000022886	Eif3g	92.508	3.9749	-4.2323	0.003827	0.99617	0.0076539	0.032213
GTGTCCTGCCGCATTTGCAA	000022889	Eif3g	181.16	11.925	-3.817	0.002042	0.99796	0.0040839	0.020032
GAGCCCGAGTTACTGCCCGG	000022888	Eif3g	83.836	5.2999	-3.7513	0.0066497	0.99335	0.013299	0.048872
GTGTCCTGCCGCATTTGCAA	000022889	Eif3g	263.96	51.074	-2.3471	0.0046846	0.99532	0.0093692	0.037527
TGTGGCCAGTAAAAACATCG	000000827	Ap3b1	261.14	17.225	-3.8464	0.00083051	0.99917	0.001661	0.01007
ATATGCTAACAAGATACGCT	000000825	Ap3b1	174.42	19.875	-3.071	0.0046113	0.99539	0.0092227	0.037079
GCTGCCTAATAAATCGTGTG	000000826	Ap3b1	707.19	219.16	-1.6856	0.0011084	0.99889	0.0022167	0.012577
GCTGCCTAATAAATCGTGTG	000000826	Ap3b1	678.39	241.15	-1.4884	0.0024271	0.99757	0.0048543	0.022852
CACGTACCTTAGGGAAATGG	000002258	Ccna2	333.41	14.575	-4.4244	0.00022435	0.99978	0.00044869	0.0035988
CATGCTCATCGTTTATAGGA	000002259	Ccna2	228.38	18.55	-3.5525	0.0015763	0.99842	0.0031526	0.016463
CACGTACCTTAGGGAAATGG	000002258	Ccna2	228.1	53.86	-2.0622	0.0096554	0.99034	0.019311	0.064743
GCCTGCCTTCACCATTCATG	000002260	Ccna2	482.78	164.3	-1.5493	0.0051373	0.99486	0.010275	0.040299
GCCTGTACCACGCAGCCAAG	000043638	Vps33a	727.03	69.647	-3.3653	2.2274e-05	0.99998	4.4548e-05	0.00051758
TAATTGCTGAGAATGTACTC	000043639	Vps33a	689.65	95.648	-2.8371	7.1552e-05	0.99993	0.0001431	0.0014092
GCCTGTACCACGCAGCCAAG	000043638	Vps33a	735.25	261.02	-1.4905	0.0018808	0.99812	0.0037615	0.018836
GCAAGAGGTTATCAAACACG	000043637	Vps33a	534.81	287.52	-0.89306	0.03134	0.96866	0.06268	0.15586
ACTCTGGTGCAAAAAAGTGT	000051845	Nrbp1	311.25	23.85	-3.6514	0.00060433	0.9994	0.0012087	0.007891
TACTAGAAGACTCATTACAG	000051846	Nrbp1	187.91	30.474	-2.5854	0.0069044	0.9931	0.013809	0.05029
TACTAGAAGACTCATTACAG	000051846	Nrbp1	238.02	64.075	-1.8769	0.011925	0.98807	0.023851	0.075817
AAACTGCTTAAGACTCCCAG	000051844	Nrbp1	492.41	159	-1.6248	0.0039943	0.99601	0.0079885	0.033289
AGCAGCACGTCAGAATCGCG	000004566	E2f1	426.89	22.525	-4.185	0.00011181	0.99989	0.00022361	0.0020394
GGAGATGATGACGATCTGCG	000004568	E2f1	116.6	7.9498	-3.7159	0.0047084	0.99529	0.0094168	0.037668
ACCAATCCAAGGATATCGCT	000004565	E2f1	277.52	25.174	-3.4116	0.0010968	0.9989	0.0021936	0.012481
CCCCAGGTGTGAAATCTCCG	000004567	E2f1	154.18	21.2	-2.8053	0.0075875	0.99241	0.015175	0.053991
GGGCAGACAATCCATAGTAG	000023420	Elovl1	191.76	30.474	-2.6146	0.0064205	0.99358	0.012841	0.047639
GGGCAGACAATCCATAGTAG	000023420	Elovl1	415.01	78.933	-2.3797	0.001299	0.9987	0.002598	0.014219
CGATAGGATGAAGTACACAT	000023418	Elovl1	341.01	70.576	-2.2565	0.0028573	0.99714	0.0057147	0.025828
TCCAAAGCTACCCTCTGATG	000023421	Elovl1	287.16	91.423	-1.6405	0.012863	0.98714	0.025726	0.080257
GTGGTGTTCCTAAGACAACA	000010472	Mcm6	130.45	1.8573	-5.5238	0.00069821	0.9993	0.0013964	0.0088074
GCACCAACCAACCCAAGGGT	000010471	Mcm6	173.17	3.7145	-5.2073	0.00061811	0.99938	0.0012362	0.0080259
AGGTCTTCAAGGCTCGACAC	000010469	Mcm6	185.02	7.9498	-4.3774	0.0011627	0.99884	0.0023253	0.013053
GCACCAACCAACCCAAGGGT	000010471	Mcm6	105.04	5.2999	-4.0731	0.003862	0.99614	0.007724	0.032447
GGATGCGGGCTTCAGAACAC	000004543	Usp17lc	202.36	2.6499	-5.8	0.00025386	0.99975	0.00050772	0.0039762
ACAGGTTTGACTGTACTCCT	000004541	Usp17lc	509.76	37.099	-3.7448	8.3288e-05	0.99992	0.00016658	0.001601
CATATGTATCTGAGGTACCC	000004542	Usp17lc	307.4	30.474	-3.2925	0.0009303	0.99907	0.0018606	0.011004
CATATGTATCTGAGGTACCC	000004542	Usp17lc	310.49	73.361	-2.0666	0.0049979	0.995	0.0099958	0.039453
AGATCTGTGCAAAAGCAGTG	000030030	Atp5e	157.15	2.7859	-5.3846	0.00061829	0.99938	0.0012366	0.008027
AGATCTGTGCAAAAGCAGTG	000030030	Atp5e	301.62	9.2748	-4.8803	0.00020575	0.99979	0.00041149	0.0033587
GAGACACCATGGTGGCGTAC	000030032	Atp5e	175.38	13.25	-3.6297	0.0026055	0.99739	0.005211	0.024098
GTGGCGTACTGGCGACAGGC	000030033	Atp5e	104.07	7.9498	-3.5534	0.0063401	0.99366	0.01268	0.047225
GCGCGGAGCCTTGCCGCCGG	000069179	Hist1h3e	157.15	4.6431	-4.8087	0.0010741	0.99893	0.0021482	0.012278
CAAGGCTCCGCGCAAGCAGC	000069176	Hist1h3e	188.43	11.144	-3.9634	0.0016394	0.99836	0.0032788	0.016959
CTTGCGCGGAGCCTTGCCGC	000069178	Hist1h3e	25.175	1.8573	-3.1955	0.018206	0.98179	0.036412	0.10441
CAAGGCTCCGCGCAAGCAGC	000069176	Hist1h3e	48.181	5.2999	-2.9647	0.020538	0.97946	0.041075	0.11411
CGTAATTGATGTCGGCGCCG	000011307	Ppp1r12a	189.83	7.9498	-4.4143	0.0010645	0.99894	0.002129	0.012195
CGAGTCGAGCTGTTCCAGTG	000011306	Ppp1r12a	238.98	14.575	-3.9456	0.0009555	0.99904	0.001911	0.011236
GCGAGGCAGTGGTTAAACAG	000011308	Ppp1r12a	225.81	55.718	-1.9996	0.010814	0.98919	0.021627	0.070497
TTTGCTGTGGACTCGATCAG	000011309	Ppp1r12a	334.14	95.648	-1.794	0.0069895	0.99301	0.013979	0.050763
CAGCAAAGGACTTCACAATG	000060149	Cnot1	43.363	1.325	-4.2541	0.0054542	0.99455	0.010908	0.042172
ATTGTCTCGAATACTTGACG	000060148	Cnot1	530.96	27.824	-4.2059	4.1321e-05	0.99996	8.2642e-05	0.00088554
TTTCTTAAGACACTACGCAG	000060151	Cnot1	223.56	15.9	-3.732	0.0013884	0.99861	0.0027768	0.014948
CAGCAAAGGACTTCACAATG	000060149	Cnot1	35.856	1.8573	-3.6892	0.010664	0.98934	0.021328	0.06979
TCTAGCACGACATTGAGACC	000033865	Ebna1bp2	283.31	10.6	-4.6153	0.00031767	0.99968	0.00063533	0.0047565
GCAGACTAAACAGGCCGCCA	000033864	Ebna1bp2	211.03	7.9498	-4.5663	0.00073054	0.99927	0.0014611	0.0091208
ATTTCTGCAAAATAATCGGT	000033862	Ebna1bp2	107.57	3.7145	-4.5253	0.0024481	0.99755	0.0048962	0.023004
CTGTAATGTCAGCTACCGGC	000033863	Ebna1bp2	59.745	3.9749	-3.61	0.0098576	0.99014	0.019715	0.065782
AGACTCTTACCAGACTTGAG	000048520	Yars	278.49	7.9498	-4.9648	0.00024385	0.99976	0.0004877	0.0038494
AGCCACGTGTGGCTTGCCCG	000048521	Yars	309.73	34.359	-3.1355	0.0010925	0.99891	0.002185	0.01244
TATTAAACTTCTCTCTAATG	000048523	Yars	695.75	195.01	-1.8297	0.00075272	0.99925	0.0015054	0.0093277
AGTTCGGCGGTGTTGATCAG	000048522	Yars	611.83	280.44	-1.1226	0.011189	0.98881	0.022378	0.072261
GTTGCAATCTGGATTCAGCG	000009740	Ldha	559.87	15.9	-5.0526	1.3849e-05	0.99999	2.7698e-05	0.00034138
GTCATGGAAGACAAACTCAA	000009739	Ldha	135.87	5.2999	-4.4413	0.0019239	0.99808	0.0038477	0.019145
GGAGAACATGGCGACTCCAG	000009738	Ldha	457.73	169.94	-1.4242	0.008168	0.99183	0.016336	0.057039
CAAGCTGGTCATTATCACCG	000009737	Ldha	309.32	133.82	-1.2027	0.028942	0.97106	0.057884	0.14704
GATTTCACTCTGAATACCTG	000075640	Gm11757	205.25	3.9749	-5.3736	0.00037206	0.99963	0.00074412	0.0053916
GAATACAAGCGGTAAGCCCT	000075638	Gm11757	347.11	8.3576	-5.2173	9.4685e-05	0.99991	0.00018937	0.0017815
GATTTCACTCTGAATACCTG	000075640	Gm11757	165.55	4.6431	-4.8833	0.00091186	0.99909	0.0018237	0.010835
GAATACAAGCGGTAAGCCCT	000075638	Gm11757	236.09	7.9498	-4.7274	0.00047833	0.99952	0.00095667	0.0065747
GGGAGACAAGCTTGTCGTGG	000018292	Txn1	360.4	17.225	-4.3096	0.00019018	0.99981	0.00038037	0.003149
TGGTGGACTTCTCTGCTACG	000018293	Txn1	440.38	23.85	-4.1507	0.00010174	0.9999	0.00020347	0.0018883
GACAAGCTTGTCTCCCGCGG	000018291	Txn1	447.12	30.474	-3.8316	0.00013382	0.99987	0.00026765	0.0023665
GACAAGCTTGTCTCCCGCGG	000018291	Txn1	457.73	137.44	-1.7284	0.0037341	0.99627	0.0074683	0.031609
ATCTTTCTTGACCATATCGG	000073003	Ypel5	547.34	41.074	-3.7041	6.2646e-05	0.99994	0.00012529	0.0012594
AGTACAGTGAAGTTCAAGAT	000073002	Ypel5	455.44	65.932	-2.7697	0.00049366	0.99951	0.00098732	0.0067346
AAAAAGAAATGCTCTACCAG	000073000	Ypel5	353.98	52.003	-2.7436	0.0012112	0.99879	0.0024223	0.013469
AGCTCACATCTCGAACCATG	000073001	Ypel5	607.25	268.37	-1.1751	0.009459	0.99054	0.018918	0.063765
GAAGGAAATCATTCTGGAGA	000077618	Gm10408	226.45	11.925	-4.1374	0.00091337	0.99909	0.0018267	0.010849
AGAACAACAGAGAAGGAAGA	000077617	Gm10408	105.04	10.6	-3.1924	0.0088266	0.99117	0.017653	0.060514
AGAACAACAGAGAAGGAAGA	000077617	Gm10408	176.23	21.358	-2.9867	0.004946	0.99505	0.009892	0.039128
AATGACATAGAGGAAATGGG	000077616	Gm10408	128.93	30.645	-2.0377	0.023593	0.97641	0.047186	0.12644
GTGGTTTGTTGGATAAGGTG	000028797	Spcs2	240.31	10.215	-4.4274	0.00060001	0.9994	0.0012	0.007847
GCCCACAGAAAAGACCCCAC	000028796	Spcs2	250.54	14.575	-4.0135	0.00079054	0.99921	0.0015811	0.0096915
AGGAGATGGTACAGATGGTG	000028794	Spcs2	291.98	31.799	-3.1591	0.0012614	0.99874	0.0025227	0.013894
CTGGCTTGGACTCAGGAAAG	000028795	Spcs2	144.54	15.9	-3.1064	0.0061534	0.99385	0.012307	0.046186
GGCTGCACGGAGAATTAAGA	000015880	Vps4b	290.05	26.499	-3.4038	0.00097518	0.99902	0.0019504	0.011409
TAAAGCCAAGCAAAGTATCA	000015881	Vps4b	405.69	80.823	-2.3133	0.0015689	0.99843	0.0031377	0.016405
GGCTGCACGGAGAATTAAGA	000015880	Vps4b	376.1	100.29	-1.8964	0.0042939	0.99571	0.0085879	0.035124
GGAAAGCGGACACCTTGGAG	000015879	Vps4b	255.57	125.36	-1.0217	0.055186	0.94481	0.11037	0.23446
GAAGGCAAGAAATTTGACCG	000063542	Polr2h	109.09	0	-6.7826	0.00055088	0.99945	0.0011018	0.0073352
AAGTACTAGCTATAACCAAC	000063540	Polr2h	152.25	7.9498	-4.0979	0.0021854	0.99781	0.0043708	0.021097
AAGTACTAGCTATAACCAAC	000063540	Polr2h	131.98	8.3576	-3.8289	0.0035443	0.99646	0.0070886	0.030386
GAATGTTTACATCTAAGATG	000063543	Polr2h	218.74	18.55	-3.4906	0.00186	0.99814	0.00372	0.018673
CCGAGTCACCGAACAGGACA	000052345	Chmp6	367.14	14.575	-4.563	0.00013976	0.99986	0.00027953	0.0024528
ACCGGGAGCAACTGCTCGAT	000052344	Chmp6	323.78	23.85	-3.7082	0.00050215	0.9995	0.0010043	0.006822
TCAGGTGATGTCCATAGAGG	000052347	Chmp6	340.16	27.824	-3.5651	0.00049785	0.9995	0.0009957	0.0067766
CCGAGTCACCGAACAGGACA	000052345	Chmp6	302.86	91.005	-1.7236	0.0098791	0.99012	0.019758	0.065896
GTACTATGGATCCTATCTCA	000055854	Stk24	825.44	134.65	-2.607	4.4387e-05	0.99996	8.8774e-05	0.00094082
GTACTATGGATCCTATCTCA	000055854	Stk24	322.81	54.324	-2.5492	0.0021004	0.9979	0.0042007	0.020471
GCAGTCAGCCTACGACTCAA	000055853	Stk24	935.29	224.73	-2.0524	0.00010437	0.9999	0.00020874	0.0019277
TGAGGAATAACACCTTCATG	000055855	Stk24	736.21	181.52	-2.014	0.00035172	0.99965	0.00070343	0.0051554
GTCACGTTACTTGTGATATG	000029292	Ppp1r2	348.83	18.55	-4.1615	0.00024671	0.99975	0.00049343	0.0038861
CGATCGTGGAAGAGGAACTG	000029290	Ppp1r2	330.52	30.474	-3.3969	0.00065961	0.99934	0.0013192	0.0084418
TGACCTACCTCGCTCCTCAG	000029293	Ppp1r2	214.89	21.2	-3.2817	0.0024041	0.9976	0.0048082	0.022685
CGATCGTGGAAGAGGAACTG	000029290	Ppp1r2	546.22	87.291	-2.6318	0.00030404	0.9997	0.00060808	0.0045921
TTCAGATGAAGAAGAAGAGC	000077262	Gm10147	71.308	5.2999	-3.5208	0.0095042	0.9905	0.019008	0.063989
TGTTGGATAAATCTGGAGGT	000077261	Gm10147	75.525	6.5004	-3.3509	0.010644	0.98936	0.021289	0.069685
TAGAGACACCAATGGAAAAC	000077260	Gm10147	119.49	11.925	-3.2207	0.0072815	0.99272	0.014563	0.052365
TGTTGGATAAATCTGGAGGT	000077261	Gm10147	16.382	1.325	-2.9023	0.022617	0.97738	0.045235	0.12253
TGGCAGACAAGCCGGACATG	000014037	Tmsb10	252.47	10.6	-4.4496	0.00051494	0.99949	0.0010299	0.0069604
TAAGAAAATGGCAGACAAGC	000014036	Tmsb10	224.52	10.6	-4.2811	0.00081635	0.99918	0.0016327	0.0099402
GGTGTTCTTCTCCTGCGTCT	000014035	Tmsb10	340.16	88.773	-1.9261	0.0051877	0.99481	0.010375	0.040602
TAAGAAAATGGCAGACAAGC	000014036	Tmsb10	252.51	113.29	-1.1493	0.042507	0.95749	0.085014	0.19464
CAGGACGTATTAAGGCACTA	000021018	Yme1l1	165.74	6.6249	-4.4508	0.0013541	0.99865	0.0027082	0.014667
TCATCGATGAATATAACACA	000021020	Yme1l1	319.92	14.575	-4.365	0.00027263	0.99973	0.00054526	0.0042038
CTTGGAGGTAAACTTCCCAA	000021019	Yme1l1	255.36	25.174	-3.2919	0.0015639	0.99844	0.0031278	0.016369
TTAACTATTACCTCACTACT	000021021	Yme1l1	1409.8	565.53	-1.3163	0.00038313	0.99962	0.00076626	0.0055204
TCCACCGTATGTAATCAACC	000040448	Gpn1	152.25	7.9498	-4.0979	0.0021854	0.99781	0.0043708	0.021097
TATGTCTTGATTGACACACC	000040447	Gpn1	268.85	15.9	-3.9971	0.00066082	0.99934	0.0013216	0.0084544
TCCACCGTATGTAATCAACC	000040448	Gpn1	27.464	1.8573	-3.3164	0.016051	0.98395	0.032103	0.094918
TGTAGAACTCATCCAACACC	000040449	Gpn1	128.16	17.225	-2.8252	0.0098168	0.99018	0.019634	0.065578
GAGCCATGACAGCCGAGCTC	000069165	Hist1h3c	94.598	3.7145	-4.3418	0.0033671	0.99663	0.0067343	0.029228
CTTCCAGAGCTCGGCTGTCA	000069164	Hist1h3c	466.4	38.424	-3.5675	0.00015169	0.99985	0.00030338	0.0026203
GAGCCATGACAGCCGAGCTC	000069165	Hist1h3c	37.581	6.6249	-2.3391	0.041227	0.95877	0.082454	0.19042
CTTCCAGAGCTCGGCTGTCA	000069164	Hist1h3c	537.83	167.15	-1.6801	0.0026958	0.9973	0.0053916	0.024737
ACTTGAACTGCTCCCCACAG	000038127	Chchd4	266.92	21.2	-3.5932	0.001009	0.99899	0.002018	0.011714
ACTTGAACTGCTCCCCACAG	000038127	Chchd4	509.61	131.86	-1.9423	0.0016348	0.99837	0.0032695	0.016926
CCAGGGTTGATACTGCCTAA	000038128	Chchd4	366.18	129.85	-1.4886	0.01112	0.98888	0.02224	0.071945
ACAGCACAGAGGATATCAAG	000038126	Chchd4	648.52	267.64	-1.2737	0.0057569	0.99424	0.011514	0.043935
GGTTAAGAATAATTCCCCGA	000046943	Trrap	154.18	6.6249	-4.3471	0.0017001	0.9983	0.0034001	0.017433
ACGTCGTGTAAAGCACCTGG	000046941	Trrap	499.69	30.645	-3.9839	6.9711e-05	0.99993	0.00013942	0.0013785
ACGTCGTGTAAAGCACCTGG	000046941	Trrap	271.74	19.875	-3.7077	0.00085368	0.99915	0.0017074	0.010287
ACCAAGGGATCCATCAACAT	000046940	Trrap	351.72	27.824	-3.6132	0.00042193	0.99958	0.00084386	0.0059523
GGTCCACCCAGACTTGGACA	000008839	Eif6	176.34	6.6249	-4.5397	0.0011064	0.99889	0.0022127	0.012561
CACAAACGCCTACTGCCTGG	000008837	Eif6	418.21	17.225	-4.5237	8.7303e-05	0.99991	0.00017461	0.0016647
CACAAACGCCTACTGCCTGG	000008837	Eif6	190.72	11.144	-3.9807	0.0015721	0.99843	0.0031442	0.016431
TGTGTCTTCAGTAATCAGGG	000008840	Eif6	206.22	111.3	-0.88381	0.089588	0.91041	0.17918	0.33056
AGGCTCATGAGATTAGCGAA	000020623	Polr3e	166.71	2.6499	-5.5219	0.00048715	0.99951	0.00097429	0.0066655
GCTGTAGTGAGAATCAACAA	000020625	Polr3e	55.89	3.9749	-3.5154	0.01122	0.98878	0.022439	0.07242
AGAACTCATAGGACTGCACG	000020622	Polr3e	114.67	14.575	-2.8928	0.010625	0.98938	0.02125	0.069587
GCTGTAGTGAGAATCAACAA	000020625	Polr3e	153.34	60.361	-1.3307	0.052312	0.94769	0.10462	0.22574
GAGAGTCTGTAAACGCCGTG	000057115	Wdr26	637.92	75.523	-3.0617	7.1939e-05	0.99993	0.00014388	0.0014158
ACGTTAGAAGGACATGCGTA	000057112	Wdr26	761.36	148.58	-2.3495	0.00012406	0.99988	0.00024813	0.0022237
GAGAGTCTGTAAACGCCGTG	000057115	Wdr26	775.09	267.44	-1.5316	0.0013672	0.99863	0.0027344	0.014771
CCTCTTACCACAATAGCGTG	000057113	Wdr26	665.87	287.52	-1.2087	0.0068174	0.99318	0.013635	0.049808
AAGCTCCTTCTCCATCACAC	000020102	Rfwd2	2135.4	108.65	-4.2842	3.4219e-10	1	6.8438e-10	2.0875e-08
ATACGGTGCTACTCACTGAG	000020103	Rfwd2	2923.6	1110.3	-1.396	3.8058e-06	1	7.6115e-06	0.00010842
AAGCTCCTTCTCCATCACAC	000020102	Rfwd2	1460.2	572.96	-1.3481	0.00027491	0.99973	0.00054981	0.0042327
ATACGGTGCTACTCACTGAG	000020103	Rfwd2	2420.6	1082.8	-1.1599	9.2591e-05	0.99991	0.00018518	0.0017479
TATAGGTAATGATGGAGGGT	000012468	Pabpc1	189.83	5.2999	-4.9208	0.00067076	0.99933	0.0013415	0.0085446
CGTACGCGTAGCCCAAGGAG	000012466	Pabpc1	167.67	9.2748	-4.037	0.0019368	0.99806	0.0038736	0.019238
GCAAGCCAGTACGCATCATG	000012467	Pabpc1	52.999	2.6499	-3.887	0.0079451	0.99205	0.01589	0.055858
TGGACGAGCTCAGAAAAAAG	000012469	Pabpc1	93.472	7.9498	-3.3999	0.0082791	0.99172	0.016558	0.057626
CCTGCGACAACTAATGACCG	000037337	Kif23	179.28	6.5004	-4.5871	0.0010248	0.99898	0.0020496	0.01185
CCTGCGACAACTAATGACCG	000037337	Kif23	197.54	13.25	-3.8004	0.0017278	0.99827	0.0034555	0.017648
CCAGACGTATGGCACTAACA	000037336	Kif23	649.48	50.349	-3.6631	2.7541e-05	0.99997	5.5082e-05	0.00062219
AAGATCATATTCAAACAACG	000037334	Kif23	573.36	133.82	-2.0909	0.00076912	0.99923	0.0015382	0.0094849
AAGTGGATGACAGAGTTGGG	000017482	Tfdp1	239.94	11.925	-4.2205	0.00072929	0.99927	0.0014586	0.0091109
AAGTGGATGACAGAGTTGGG	000017482	Tfdp1	269.3	34.359	-2.9344	0.0020524	0.99795	0.0041048	0.02011
TTGGATGCTGCCGGTCTCTG	000017485	Tfdp1	397.98	100.7	-1.972	0.0031749	0.99683	0.0063497	0.027973
TTGGATGCTGCCGGTCTCTG	000017485	Tfdp1	524.1	147.65	-1.8207	0.0020148	0.99799	0.0040295	0.019834
TGTATGTGATGATCTTAGAG	000045558	Kars	322.81	17.225	-4.1512	0.00032459	0.99968	0.00064917	0.0048398
TGTGGCTATTGACTACCTTG	000045559	Kars	125.27	10.6	-3.4444	0.0054976	0.9945	0.010995	0.042424
CTCATCTTCTATGACCTGCG	000045556	Kars	247.65	23.85	-3.3228	0.0016365	0.99836	0.0032731	0.016937
TGTGGCTATTGACTACCTTG	000045559	Kars	181.57	54.789	-1.7104	0.023797	0.9762	0.047593	0.12727
TATTCCTACATCAACAACGC	000020936	Nbn	749.7	31.799	-4.5165	4.393e-06	1	8.786e-06	0.00012324
TGGAGAAAGCTGATAGCTCG	000020937	Nbn	118.53	17.225	-2.7134	0.012238	0.98776	0.024476	0.077358
GAGAATTACTGTAATCCGCA	000020935	Nbn	599.38	204.05	-1.5499	0.0028667	0.99713	0.0057334	0.025898
TGGAGAAAGCTGATAGCTCG	000020937	Nbn	254.04	104.93	-1.2675	0.032974	0.96703	0.065949	0.16182
CCGTGGACTTCAACCACAAG	000022250	Cpsf2	282.34	11.925	-4.4543	0.00037201	0.99963	0.00074402	0.0053914
CGGGAACGTGCTGATAGCTG	000022251	Cpsf2	148.4	13.25	-3.3902	0.0044498	0.99555	0.0088996	0.036103
GAGCCAAGTCAGAAAGACCG	000022252	Cpsf2	156.39	15.787	-3.229	0.0047717	0.99523	0.0095434	0.038057
CGGGAACGTGCTGATAGCTG	000022251	Cpsf2	337.96	72.433	-2.2066	0.0031833	0.99682	0.0063666	0.028024
TGTAGAGGAAGACAGGAACA	000075155	Rhox3g	200.43	14.575	-3.693	0.0018559	0.99814	0.0037119	0.018641
TGTAGAGGAAGACAGGAACA	000075155	Rhox3g	263.19	50.146	-2.3689	0.0045699	0.99543	0.0091397	0.03683
GTGACCAGGCTGAAGCGCCA	000075154	Rhox3g	604.19	143.1	-2.0704	0.00066533	0.99933	0.0013307	0.0084934
GGCTGAAGAGGGAAGAAATG	000075153	Rhox3g	460.78	128.15	-1.8382	0.002825	0.99718	0.0056499	0.025615
TTTCCTTCCATTCTAGTCGG	000016737	Stag2	1156.4	91.423	-3.6464	5.9369e-07	1	1.1874e-06	2.0252e-05
ATTTCGACATACAAGCACCC	000016734	Stag2	1917.9	631.47	-1.6012	1.4028e-05	0.99999	2.8055e-05	0.00034516
ATTTCGACATACAAGCACCC	000016734	Stag2	1711.4	582.99	-1.552	3.7535e-05	0.99996	7.507e-05	0.00081498
CTTACTTTAGCTAATAACTG	000016735	Stag2	932.24	320.38	-1.538	0.00068932	0.99931	0.0013786	0.008726
TGAACGTGCCTAAAACCCGC	000014928	Rpl36a	134.91	3.9749	-4.7718	0.0014278	0.99857	0.0028556	0.015271
AAGGATTCTTTGTATGCCCA	000014926	Rpl36a	133.94	3.9749	-4.7615	0.0014574	0.99854	0.0029148	0.015522
TGAACGTGCCTAAAACCCGC	000014928	Rpl36a	41.959	0.92863	-4.4773	0.003991	0.99601	0.007982	0.033268
CGTTACGACAGGAAACAGAG	000014927	Rpl36a	99.175	27.859	-1.7954	0.041328	0.95867	0.082656	0.19076
AAAGGAAGACACGTCGTACG	000024722	Ykt6	193.77	2.7859	-5.685	0.00031154	0.99969	0.00062308	0.0046816
CCGGCTACAATCCAGTACAC	000024724	Ykt6	362.37	10.215	-5.018	9.6793e-05	0.9999	0.00019359	0.0018136
AAAGGAAGACACGTCGTACG	000024722	Ykt6	63.599	3.9749	-3.6988	0.0087029	0.9913	0.017406	0.059876
AACTGATTGTGGAACGCTCG	000024723	Ykt6	337.27	33.124	-3.3093	0.00068357	0.99932	0.0013671	0.0086709
AAATCCGATTTACTTCAGGT	000027315	Sf3b6	84.68	0.92863	-5.4733	0.0010132	0.99899	0.0020264	0.011748
GGGAATACACCTGAAACCAG	000027316	Sf3b6	97.649	1.8573	-5.1096	0.0014864	0.99851	0.0029728	0.015748
GGGAATACACCTGAAACCAG	000027316	Sf3b6	60.708	1.325	-4.7302	0.0029455	0.99705	0.005891	0.026415
AAATCCGATTTACTTCAGGT	000027315	Sf3b6	219.71	9.2748	-4.4249	0.00075451	0.99925	0.001509	0.0093428
TGTGAACGGACGTCACACCA	000019805	Psmd13	190.8	7.9498	-4.4216	0.001046	0.99895	0.002092	0.012035
CATCTTTGTAGTAGGACGCG	000019803	Psmd13	350.76	26.499	-3.6771	0.0003974	0.9996	0.0007948	0.0056828
CATGTGGTTAGACAGATGAC	000019804	Psmd13	85.763	6.6249	-3.5083	0.0081718	0.99183	0.016344	0.057055
TGTGAACGGACGTCACACCA	000019805	Psmd13	216.66	26.002	-3.011	0.0031645	0.99684	0.006329	0.027903
TCGCTTCATAAACAACAATG	000020673	Cul1	705.37	37.099	-4.2126	8.892e-06	0.99999	1.7784e-05	0.00023081
CTTGCAGCAATTGAGAAGTG	000020670	Cul1	1019.2	220.08	-2.2062	4.0418e-05	0.99996	8.0837e-05	0.00086894
TCGCTTCATAAACAACAATG	000020673	Cul1	625.56	140.22	-2.1495	0.00047957	0.99952	0.00095914	0.0065862
GAAGTTCTACACTCAGCAGT	000020671	Cul1	484.7	292.82	-0.72515	0.061708	0.93829	0.12342	0.25376
AGAGACCAGACCAAGGCAGA	000074321	Gm5622	170.56	3.9749	-5.1079	0.00069889	0.9993	0.0013978	0.0088127
GATTAGTGATGTTGCAACTT	000074322	Gm5622	520.36	26.499	-4.2448	4.372e-05	0.99996	8.744e-05	0.00092866
AAATCATTCTGGGGAAGACA	000074320	Gm5622	241.87	11.925	-4.232	0.00070654	0.99929	0.0014131	0.0088899
AGAGACCAGACCAAGGCAGA	000074321	Gm5622	40.433	2.7859	-3.4521	0.013544	0.98646	0.027088	0.083441
AGAGATACGACGAGCCAAGG	000020860	Chaf1a	228.38	13.25	-4.0087	0.0010094	0.99899	0.0020188	0.011717
CGGGTGGGCCCCGATCTCAA	000020861	Chaf1a	376.86	91.005	-2.0381	0.0032294	0.99677	0.0064587	0.028329
AATCAAGCCAGTACCGAGTG	000020858	Chaf1a	536.74	185.5	-1.5278	0.0041526	0.99585	0.0083052	0.034277
AATCAAGCCAGTACCGAGTG	000020858	Chaf1a	462.31	162.51	-1.5026	0.0064657	0.99353	0.012931	0.047888
CCCCATCTACTCCATAACCA	000007754	Hnrnpl	317.03	17.225	-4.1252	0.00035322	0.99965	0.00070645	0.0051732
CCCCATCTACTCCATAACCA	000007754	Hnrnpl	471.46	39.931	-3.5289	0.0001518	0.99985	0.0003036	0.0026216
CTATTACGGCGGCGGCAACG	000007755	Hnrnpl	427.85	104.67	-2.0209	0.0023426	0.99766	0.0046853	0.022262
GATGTCAGCCCCATTGAGTG	000007756	Hnrnpl	579.03	149.51	-1.9463	0.0010581	0.99894	0.0021161	0.012141
GAGTTAGAGACCGAGACCAG	000031305	Hypk	218.74	18.55	-3.4906	0.00186	0.99814	0.00372	0.018673
CATTGGAGACAGACGGTCCA	000031303	Hypk	263.07	70.224	-1.8905	0.0096573	0.99034	0.019315	0.064754
GAGATCGAAATGGCGACCGA	000031304	Hypk	369.07	107.32	-1.7725	0.0058134	0.99419	0.011627	0.044253
CATTGGAGACAGACGGTCCA	000031303	Hypk	231.15	77.076	-1.5721	0.021062	0.97894	0.042124	0.11623
GACAGGAGTCCAGCCCGAGG	000044801	Cwc22	149.36	3.9749	-4.9176	0.0010584	0.99894	0.0021168	0.012143
TTAACCCAGGTGTCACCAAG	000044803	Cwc22	80.103	7.429	-3.2663	0.010946	0.98905	0.021893	0.071128
ATCCGATTACTTACACTCCA	000044800	Cwc22	115.64	13.25	-3.033	0.0091398	0.99086	0.01828	0.062162
TTAACCCAGGTGTCACCAAG	000044803	Cwc22	89.617	18.55	-2.2126	0.028142	0.97186	0.056284	0.14401
TGTGGAAAAGAACCGCAAGG	000024261	Becn1	145.51	5.2999	-4.5395	0.0015733	0.99843	0.0031466	0.016441
GGATGACGAACTCAAGAGTG	000024260	Becn1	197.54	10.6	-4.0973	0.0013064	0.99869	0.0026127	0.014281
GGAAGAGGCTAACTCAGGAG	000024259	Becn1	120.45	14.575	-2.9631	0.0092843	0.99072	0.018569	0.062894
GGATGACGAACTCAAGAGTG	000024260	Becn1	302.86	52.932	-2.4942	0.0027033	0.9973	0.0054066	0.02479
GCAGCGCCACGGTGCCGGGC	000007315	Hist2h3c1	167.83	2.7859	-5.4788	0.00050272	0.9995	0.0010054	0.0068267
GCAGCGCCACGGTGCCGGGC	000007315	Hist2h3c1	133.94	2.6499	-5.2083	0.00094195	0.99906	0.0018839	0.011111
AAGAGCGCCCCGGCCACGGG	000007313	Hist2h3c1	104.07	2.6499	-4.8474	0.001849	0.99815	0.0036979	0.018588
AAGAGCGCCCCGGCCACGGG	000007313	Hist2h3c1	22.124	71.504	1.6487	0.99833	0.0016749	0.0033498	0.017232
GATAGGCGAGATCGCCGCCG	000001751	Btg1	550.23	31.799	-4.0709	4.0111e-05	0.99996	8.0221e-05	0.00086315
ACTGCTCAGTCCAATCCGCT	000001749	Btg1	993.5	75.523	-3.7	1.7674e-06	1	3.5347e-06	5.4357e-05
CCAAGTTCCTCCGCACCAAG	000001750	Btg1	698.63	62.274	-3.4669	2.404e-05	0.99998	4.8081e-05	0.00055307
CCAAGTTCCTCCGCACCAAG	000001750	Btg1	1187.8	278.59	-2.0881	2.5026e-05	0.99997	5.0052e-05	0.00057235
GCTGGGACTCACTCGCTCTG	000000900	Birc5	216.82	3.9749	-5.4523	0.00030486	0.9997	0.00060973	0.0046015
GAAGGGCCAGTTCTTGAAGG	000000898	Birc5	30.515	0.92863	-4.0304	0.0066342	0.99337	0.013268	0.0488
AGGTACAGCTGCCAGATCTG	000000897	Birc5	110.62	6.5004	-3.8955	0.0042714	0.99573	0.0085427	0.034988
AGGTACAGCTGCCAGATCTG	000000897	Birc5	68.417	3.9749	-3.8026	0.0074927	0.99251	0.014985	0.05348
GCCGGTTATATAGATTCCCC	000050242	Atp6v0b	157.07	6.6249	-4.3737	0.0016049	0.9984	0.0032097	0.016693
CCACATCAAAGCGAAAGCCC	000050241	Atp6v0b	242.83	18.55	-3.6407	0.001237	0.99876	0.002474	0.013691
CAGATTCGACCACATGAAGG	000050240	Atp6v0b	90.581	6.6249	-3.5863	0.007187	0.99281	0.014374	0.051834
GCCGGTTATATAGATTCCCC	000050242	Atp6v0b	152.58	26.93	-2.4591	0.011364	0.98864	0.022727	0.073091
GAGCTGACTACCAATGGCCA	000032008	Pold3	321.85	17.225	-4.1469	0.00032918	0.99967	0.00065836	0.0048961
GTGGCTAAGCTATACACTAG	000032009	Pold3	261.14	18.55	-3.7451	0.00091833	0.99908	0.0018367	0.010897
GTGGCTAAGCTATACACTAG	000032009	Pold3	90.783	10.215	-3.0328	0.012108	0.98789	0.024215	0.076706
AAAGCTATGCTAAAGGACAG	000032006	Pold3	387.54	87.291	-2.1377	0.0024752	0.99752	0.0049504	0.023202
ACAATGTCGTCATACAGGCT	000027915	Eapp	141.65	7.9498	-3.9945	0.0027174	0.99728	0.0054348	0.024878
AAGCTGACCTGTTCCCAGTG	000027914	Eapp	178.27	17.225	-3.2982	0.0034996	0.9965	0.0069992	0.030103
GGTGGAAGAGCCGAGCGACG	000027916	Eapp	127.2	17.225	-2.8144	0.010032	0.98997	0.020063	0.066639
AAGCTGACCTGTTCCCAGTG	000027914	Eapp	263.96	43.645	-2.5692	0.0034373	0.99656	0.0068745	0.029702
CTGGGATACAAGGCTAAGCA	000028470	Rpl15	33.727	1.325	-3.9008	0.0082305	0.99177	0.016461	0.057369
GGCGTTTACGACCACCACGG	000028472	Rpl15	7.709	0	-3.1225	0.037052	0.96295	0.074105	0.17628
CTGGGATACAAGGCTAAGCA	000028470	Rpl15	12.969	0.92863	-2.8566	0.020722	0.97928	0.041444	0.11487
GGCGTTTACGACCACCACGG	000028472	Rpl15	2.2886	0	-1.7175	0.11809	0.88191	0.23617	0.40085
ACCAAGCACATGCTGCCCAG	000014918	Rpl32	72.272	1.325	-4.978	0.0020663	0.99793	0.0041327	0.020217
TGTGTCTTCAGCGAAACTGG	000014921	Rpl32	26.018	0	-4.7558	0.0083876	0.99161	0.016775	0.058202
CCACAATGTCAAGGAGCTGG	000014919	Rpl32	54.927	1.325	-4.5883	0.003569	0.99643	0.0071381	0.030532
GAGGCATTGACAACAGGGTG	000014920	Rpl32	147.43	9.2748	-3.8526	0.0028993	0.9971	0.0057986	0.026114
CACCATGACTGTAACCAATG	000077954	Gm14308	218.74	10.6	-4.2436	0.00090084	0.9991	0.0018017	0.010729
ACCACATTGAATAAACTCAG	000077953	Gm14308	240.91	94.073	-1.3473	0.030184	0.96982	0.060367	0.15161
TATGTGTTCGCTCATGTTTG	000077956	Gm14308	661.05	304.74	-1.1146	0.0097967	0.9902	0.019593	0.065476
TATGTGTTCGCTCATGTTTG	000077956	Gm14308	1155	570.18	-1.0171	0.0039475	0.99605	0.0078949	0.032987
GGTTGCCACTGCCATCCGAG	000009884	Rps2	73.236	2.6499	-4.3462	0.0041695	0.99583	0.008339	0.034382
AGGTAAAGCTGAAGACAAGG	000009881	Rps2	176.34	7.9498	-4.3085	0.0013665	0.99863	0.002733	0.014764
ATCTTAACCAACCTTGAACC	000009882	Rps2	383.52	98.048	-1.9569	0.0036141	0.99639	0.0072283	0.030834
ATCTTAACCAACCTTGAACC	000009882	Rps2	379.92	132.79	-1.5095	0.0098205	0.99018	0.019641	0.065595
CAGATTGAAGTGCTGACCAG	000025182	Akap10	193.01	10.215	-4.1126	0.0013551	0.99864	0.0027102	0.014675
CAGATTGAAGTGCTGACCAG	000025182	Akap10	422.07	137.8	-1.6079	0.0061379	0.99386	0.012276	0.046097
CTTACAATTCTGGTTAGCAG	000025183	Akap10	365.21	159	-1.1946	0.022964	0.97704	0.045927	0.12392
TGATTGAGTCACAAGCAGTG	000025185	Akap10	424.93	194.08	-1.1265	0.021607	0.97839	0.043215	0.11844
GCTGGTCTCGAATTTCCACA	000004687	Eef1a1	71.308	1.325	-4.9589	0.0021256	0.99787	0.0042511	0.020659
TGTTCTCAAGCCTGGCATGG	000004688	Eef1a1	133.5	5.5718	-4.3552	0.0021409	0.99786	0.0042818	0.020768
AGCCAGAAGAGCATGCTCGC	000004686	Eef1a1	98.29	13.25	-2.8007	0.01397	0.98603	0.02794	0.085456
GCTGGTCTCGAATTTCCACA	000004687	Eef1a1	11.443	1.8573	-2.1227	0.050017	0.94998	0.10003	0.2186
CCCTATGAATGTAAGCAATG	000076823	Gm8898	271.74	3.9749	-5.7767	0.00012542	0.99987	0.00025083	0.0022421
CCCTATGAATGTAAGCAATG	000076823	Gm8898	151.05	6.5004	-4.3414	0.0017715	0.99823	0.003543	0.017985
GAGAGTACCACTTTGTGCAA	000076824	Gm8898	123.34	9.2748	-3.5972	0.004865	0.99513	0.0097301	0.038638
GAGAGTACCACTTTGTGCAA	000076824	Gm8898	186.91	42.717	-2.1038	0.012896	0.9871	0.025792	0.080407
AATCGGGAGTTGCTTAGCCA	000019466	Cdc6	413.4	13.25	-4.862	6.6781e-05	0.99993	0.00013356	0.0013299
ACTAAGTCGATCCTGCAAGA	000019468	Cdc6	169.6	9.2748	-4.0534	0.0018661	0.99813	0.0037323	0.018718
ACGTCCACACACGGAGTGGT	000019467	Cdc6	70.345	3.9749	-3.8421	0.0070692	0.99293	0.014138	0.051199
ACTAAGTCGATCCTGCAAGA	000019468	Cdc6	191.48	46.431	-2.0208	0.013917	0.98608	0.027833	0.085201
ATACCAAGTGGAGTATGCCA	000020319	Psma4	167.67	10.6	-3.862	0.0022796	0.99772	0.0045593	0.021801
ATACCAAGTGGAGTATGCCA	000020319	Psma4	65.608	3.7145	-3.8205	0.007578	0.99242	0.015156	0.053946
TGACCCAAGTGGAAACTATG	000020321	Psma4	181.57	35.288	-2.3309	0.010036	0.98996	0.020073	0.066662
ACGTTCTGACTAACGAGCTA	000020318	Psma4	624.43	152.37	-2.0278	0.00065366	0.99935	0.0013073	0.0083846
CTTGGATATGCTTACCCGGG	000077484	Gm3139	222.76	53.86	-2.0281	0.010617	0.98938	0.021234	0.069545
CAACTCGCTCATAAAGACAA	000077482	Gm3139	456.97	113.29	-2.0025	0.0020023	0.998	0.0040047	0.019737
CCCTATTATGAATATAACAG	000077483	Gm3139	22.163	5.2999	-1.8784	0.070532	0.92947	0.14106	0.27931
CCCTATTATGAATATAACAG	000077483	Gm3139	125.88	35.288	-1.8059	0.032456	0.96754	0.064912	0.15988
ACCAGATCAAGTTATCAAAG	000029690	Med28	1116.9	243.3	-2.194	2.4802e-05	0.99998	4.9604e-05	0.00056804
ACCAGATCAAGTTATCAAAG	000029690	Med28	872.08	274.27	-1.6653	0.00054604	0.99945	0.0010921	0.00729
CGAGTTGGAGTCATCCTTCG	000029692	Med28	738.47	274.87	-1.4225	0.002369	0.99763	0.004738	0.02245
CGAGTTGGAGTCATCCTTCG	000029692	Med28	632.14	336.54	-0.90745	0.023082	0.97692	0.046163	0.12438
AGAGGCAGTGGGAAAAAGAG	000007741	Hnrnpa1	127.4	1.8573	-5.4899	0.00074578	0.99925	0.0014916	0.0092656
AGTGCTTCATCCAGTCAGAG	000007742	Hnrnpa1	336.31	35.774	-3.1973	0.00078775	0.99921	0.0015755	0.0096625
GTTTGTCACATATGCCACTG	000007744	Hnrnpa1	158.03	18.55	-3.0241	0.005776	0.99422	0.011552	0.044041
AGAGGCAGTGGGAAAAAGAG	000007741	Hnrnpa1	40.472	209.35	2.3425	1	3.8623e-12	7.7246e-12	3.1093e-10
GGACACCAGTGGCAGTGCCC	000076439	Rhox4d	207.18	13.25	-3.8688	0.0014549	0.99855	0.0029099	0.015501
GGAGAAGGTGGGCCTGCTGC	000076440	Rhox4d	511.89	156.01	-1.7078	0.0028866	0.99711	0.0057733	0.026036
GGACACCAGTGGCAGTGCCC	000076439	Rhox4d	124.35	40.86	-1.5823	0.044207	0.95579	0.088414	0.20011
CCAGATACCAGCACTGGAAT	000076438	Rhox4d	429.78	223.92	-0.93753	0.036815	0.96319	0.073629	0.17547
CAGTGCTGGTATCTGGTGTG	000025812	Rhox4b	634.72	93.791	-2.7456	0.00012722	0.99987	0.00025445	0.0022682
AAGGACAAGGAAAAGTTGAA	000025810	Rhox4b	207.18	34.449	-2.554	0.0059514	0.99405	0.011903	0.045032
TTTGTCCCATTCCACTGCTG	000025813	Rhox4b	592.76	212.66	-1.4746	0.0037314	0.99627	0.0074629	0.031596
CAGACAGTCTTACCACTGGA	000025811	Rhox4b	399.9	144.42	-1.463	0.0098767	0.99012	0.019753	0.065887
TGAACCCTGAGGTGACGCAG	000029789	Pmf1	382.56	22.525	-4.0272	0.00020176	0.9998	0.00040351	0.0033063
AGGGGACGCGACCATCCCCA	000029786	Pmf1	136.83	17.225	-2.919	0.0081078	0.99189	0.016216	0.056723
TCCTTCCTGACAGCTACGAG	000029788	Pmf1	330.52	62.274	-2.3894	0.002507	0.99749	0.0050141	0.023422
AGGGTGCCATGACACTACAC	000029787	Pmf1	600.39	175.51	-1.7685	0.0015037	0.9985	0.0030073	0.015882
AGATCGGATTCGTAGCACTG	000022322	Tubgcp4	335.34	33.124	-3.3011	0.00070304	0.9993	0.0014061	0.0088548
CATGTGATATGGAGAGATGC	000022323	Tubgcp4	187.67	39.002	-2.2377	0.010701	0.9893	0.021402	0.069967
AGATCGGATTCGTAGCACTG	000022322	Tubgcp4	388.31	105.86	-1.8651	0.0042223	0.99578	0.0084446	0.034704
GAAGAGTTCTTCATCAAACA	000022324	Tubgcp4	711.77	318.52	-1.1575	0.0070612	0.99294	0.014122	0.051153
GCAGTGCTACCTGTACATGA	000031888	Mak16	193.69	2.6499	-5.7372	0.00029594	0.9997	0.00059188	0.0044927
CATTTGTGTCTGATAAAGCG	000031887	Mak16	164.78	6.6249	-4.4424	0.0013796	0.99862	0.0027592	0.014875
GCAGTGCTACCTGTACATGA	000031888	Mak16	54.928	1.8573	-4.2909	0.0050839	0.99492	0.010168	0.039985
CATCCTAGAACCAAGACTCA	000031886	Mak16	499.16	299.44	-0.73529	0.057879	0.94212	0.11576	0.24246
CACTGTCCGGATACAACTGA	000031354	Slc25a37	412.43	11.925	-4.9994	5.9497e-05	0.99994	0.00011899	0.0012042
CTGGATTCATTACTGCATCG	000031355	Slc25a37	255.36	37.099	-2.7503	0.0029425	0.99706	0.0058849	0.026399
GCATCTATGGCGCCCTCAAG	000031357	Slc25a37	502.05	147.07	-1.7644	0.0026401	0.99736	0.0052803	0.02434
CACTGTCCGGATACAACTGA	000031354	Slc25a37	530.2	237.73	-1.1539	0.013398	0.9866	0.026797	0.082758
CCCGAAGAGTTACCGGCACC	000042630	Trp53rk	219.71	9.2748	-4.4249	0.00075451	0.99925	0.001509	0.0093428
GCGGCTCCGCTCGCGCGCCG	000042632	Trp53rk	253.43	23.85	-3.356	0.0014883	0.99851	0.0029766	0.015758
CCGTCGGCGGACGGTGCAGG	000042631	Trp53rk	476.03	50.349	-3.2157	0.00021742	0.99978	0.00043483	0.0035085
CCGTCGGCGGACGGTGCAGG	000042631	Trp53rk	688.88	278.59	-1.3031	0.0044464	0.99555	0.0088928	0.036087
AAGAATTACTATATCCACAG	000051136	Nup155	179.28	5.5718	-4.7778	0.00086095	0.99914	0.0017219	0.01035
TAAGCTAATGCCGTCTACGG	000051138	Nup155	103.11	7.9498	-3.5401	0.0064918	0.99351	0.012984	0.048023
TCGGCCGAATACACTGACAC	000051139	Nup155	151.29	14.575	-3.2895	0.0047546	0.99525	0.0095091	0.037959
AAGAATTACTATATCCACAG	000051136	Nup155	57.818	10.6	-2.3421	0.033998	0.966	0.067996	0.16549
GTCCGAGATAGAGTTCCTCG	000035205	Exoc1	671.65	30.474	-4.4176	9.4926e-06	0.99999	1.8985e-05	0.00024412
GGCCATGATTGACTGAATGT	000035204	Exoc1	618.65	50.349	-3.593	3.9039e-05	0.99996	7.8078e-05	0.00084289
ACAGACTATGGAAAATACGA	000035202	Exoc1	445.2	63.599	-2.7881	0.00052208	0.99948	0.0010442	0.0070383
GAGAATCAGAGTGTAGCGGG	000035203	Exoc1	369.07	100.7	-1.8635	0.0048132	0.99519	0.0096265	0.03833
GAGCACCACATATTCTGTGG	000054594	Wdr18	265	11.925	-4.3632	0.00048713	0.99951	0.00097425	0.0066655
AACCTGCTCACCTACCGAGG	000054592	Wdr18	230.39	13.001	-4.0468	0.00095258	0.99905	0.0019052	0.011213
AACCTGCTCACCTACCGAGG	000054592	Wdr18	131.05	10.6	-3.5089	0.0048374	0.99516	0.0096748	0.038471
GTCCTGCCTGAAGTTTACAG	000054595	Wdr18	194.65	25.174	-2.9021	0.0044769	0.99552	0.0089538	0.036273
TGTTCTGATAGATATCGGTG	000021541	Ulk2	313.54	4.6431	-5.8006	7.9374e-05	0.99992	0.00015875	0.0015363
TGTTCTGATAGATATCGGTG	000021541	Ulk2	249.58	19.875	-3.5854	0.0012185	0.99878	0.002437	0.013531
ATGTTGAGACATAATAACCT	000021539	Ulk2	532.89	47.699	-3.4546	9.698e-05	0.9999	0.00019396	0.0018165
GGCAGTGGGAACACTCACGA	000021540	Ulk2	86.969	245.16	1.4845	0.99995	4.8523e-05	9.7045e-05	0.0010142
ACTTACCGTGTTCGTAGACA	000006785	Gpi1	248.62	5.2999	-5.3082	0.00024681	0.99975	0.00049362	0.0038867
CGGCAAAGATGTGATGCCGG	000006786	Gpi1	201.4	6.6249	-4.7303	0.00070105	0.9993	0.0014021	0.0088347
GTACACTGGCAAATCCATCA	000006787	Gpi1	81.908	5.2999	-3.7181	0.007011	0.99299	0.014022	0.050886
TTAGAGACAAACCAGACACG	000006788	Gpi1	121.3	49.217	-1.2842	0.068726	0.93127	0.13745	0.27419
CTGGAGTGAACACTCTGCAG	000020696	Brd7	480.85	34.449	-3.7648	0.00010569	0.99989	0.00021138	0.0019467
AGCTCGTTAGCCAAACAAGA	000020694	Brd7	440.38	41.074	-3.391	0.00023779	0.99976	0.00047559	0.0037744
CTGGAGTGAACACTCTGCAG	000020696	Brd7	447.05	158.79	-1.4874	0.0072751	0.99272	0.01455	0.052332
CAGGAGGCAAGCTAACACGG	000020695	Brd7	881.13	350.09	-1.3291	0.0019819	0.99802	0.0039638	0.019576
ATTCTACAAGGATGTGCTAG	000038016	Naa50	669.81	29.716	-4.4488	9.3332e-06	0.99999	1.8666e-05	0.00024058
CTTGCACCTTACCGAAGACT	000038017	Naa50	658.37	44.574	-3.8548	2.0098e-05	0.99998	4.0196e-05	0.00047311
AATTTATCATTATAGCTGAC	000038014	Naa50	451.94	46.374	-3.2572	0.00025413	0.99975	0.00050827	0.0039798
CTTGCACCTTACCGAAGACT	000038017	Naa50	435.56	140.45	-1.6259	0.0054453	0.99455	0.010891	0.042127
CAGCCAACAGCAGCCATCCA	000010648	Mgat1	800.77	47.699	-4.0412	4.9417e-06	1	9.8833e-06	0.000137
AGGAGCATTATGCTTTGTGG	000010645	Mgat1	470.25	38.424	-3.5793	0.00014444	0.99986	0.00028888	0.002519
AGTCCTGACTGACAATAATG	000010646	Mgat1	670.68	169.6	-1.9772	0.00056805	0.99943	0.0011361	0.0075177
AGTCCTGACTGACAATAATG	000010646	Mgat1	444	141.15	-1.6464	0.0049378	0.99506	0.0098756	0.039084
AGTCAGTAGTATGTACACAC	000023954	Paxip1	675.5	47.699	-3.7961	1.8718e-05	0.99998	3.7437e-05	0.00044502
TCCTCATAGATGATCAGGCG	000023957	Paxip1	405.69	30.474	-3.6917	0.00023055	0.99977	0.00046109	0.0036817
GCCTTGGTTACGTTCCACGG	000023955	Paxip1	925.08	75.523	-3.5972	3.4372e-06	1	6.8744e-06	9.8918e-05
GCCTTGGTTACGTTCCACGG	000023955	Paxip1	954.37	226.58	-2.0697	8.9115e-05	0.99991	0.00017823	0.001693
TCCGCCACGTTGTTGAAGCA	000038276	Lsm11	424.96	19.875	-4.3509	9.6594e-05	0.9999	0.00019319	0.0018105
ATCCGCGTAAGCACATTGCG	000038275	Lsm11	431.79	61.289	-2.7966	0.00057622	0.99942	0.0011524	0.0075995
TCCGCCACGTTGTTGAAGCA	000038276	Lsm11	427.98	180.15	-1.2437	0.015362	0.98464	0.030724	0.091783
AGAACTTGTCGAAGGCGACG	000038274	Lsm11	657.19	282.22	-1.2166	0.0068337	0.99317	0.013667	0.049892
ACTGGGGTCCATCACTACAG	000014915	Rpl30	170.12	0	-7.4189	0.0001541	0.99985	0.0003082	0.0026547
AAAAGTGGGAAGTACGTGCT	000014914	Rpl30	151.29	7.9498	-4.0888	0.0022284	0.99777	0.0044568	0.02143
ACTGGGGTCCATCACTACAG	000014915	Rpl30	22.163	1.325	-3.3166	0.01521	0.98479	0.03042	0.091101
AAAAGTGGGAAGTACGTGCT	000014914	Rpl30	45.01	3.7145	-3.2868	0.015472	0.98453	0.030944	0.092267
AACTCAGATGAAGTTAACCC	000075898	Xlr5b	514.58	31.799	-3.9744	6.1498e-05	0.99994	0.000123	0.0012384
GTACTGTGAAAGATTTGGGT	000075899	Xlr5b	333.41	27.824	-3.5363	0.00054891	0.99945	0.0010978	0.0073145
AAAGAGGAAACAGTTTGAAG	000075897	Xlr5b	36.618	102.15	1.4552	0.99759	0.0024138	0.0048277	0.022755
TTCAGGATCAGACATGCAAG	000075900	Xlr5b	566.82	217.3	-1.3791	0.0056488	0.99435	0.011298	0.0433
TGAACTTCAGGGTCTTACTG	000058742	Haus3	180.2	5.2999	-4.8461	0.00080035	0.9992	0.0016007	0.0097868
GAAGTCGAGTATAAAATGGG	000058741	Haus3	240.91	9.2748	-4.5573	0.00052942	0.99947	0.0010588	0.007112
TGATCGCTGGAGATCGCTGA	000058743	Haus3	435.61	71.504	-2.5902	0.00077293	0.99923	0.0015459	0.0095182
GAAGTCGAGTATAAAATGGG	000058741	Haus3	227.34	82.648	-1.4488	0.026981	0.97302	0.053963	0.1396
CCTAGACGCGACGGTCCCGA	000037414	Nupl1	237.05	3.9749	-5.5805	0.00021752	0.99978	0.00043504	0.0035099
TACTAAAGTCTATACCACCA	000037416	Nupl1	397.98	25.174	-3.9301	0.00019197	0.99981	0.00038393	0.0031726
TGGCAGGCTTAGATCCAAAG	000037417	Nupl1	418.21	31.799	-3.6759	0.00020851	0.99979	0.00041702	0.0033951
GAGAGTAAGACCACTAGCTG	000037415	Nupl1	37.381	239.59	2.6481	1	3.0443e-18	6.0885e-18	4.9089e-16
ATTCGCATGTATGTGGCCAA	000014888	Rpl21	271.74	3.9749	-5.7767	0.00012542	0.99987	0.00025083	0.0022421
ATGCCCCATAAGTGCTACCA	000014887	Rpl21	65.527	2.6499	-4.188	0.0052568	0.99474	0.010514	0.04101
AAGGCCTAGAGAACATGTAC	000014886	Rpl21	24.091	1.325	-3.4319	0.01355	0.98645	0.027099	0.083457
ATGCCCCATAAGTGCTACCA	000014887	Rpl21	128.16	59.432	-1.0958	0.087566	0.91243	0.17513	0.32515
CAGGGTTCCCGCTCTTGGTG	000015015	Rps29	2.8909	189.47	5.6133	1	0	0	0
CGTATTTGCGGATCAGACCG	000015016	Rps29	126.64	1.8573	-5.4813	0.00075827	0.99924	0.0015165	0.0093796
CTCACCAAGAGCGGGAACCC	000015017	Rps29	22.124	0	-4.5313	0.010522	0.98948	0.021045	0.069072
ACATGTTCAGCCCGTATTTG	000015014	Rps29	253.43	11.925	-4.2991	0.00058556	0.99941	0.0011711	0.0076975
GGGGGAATGGTAGTAACGAA	000045490	Usp8	0.96363	95.398	5.6174	1	0	0	0
CTGAACTAAACCAGTCGAGA	000045488	Usp8	658.16	39.749	-4.0158	1.6623e-05	0.99998	3.3245e-05	0.00040066
TCTTTCAACTAGATACGAAG	000045491	Usp8	370.76	57.575	-2.666	0.0011727	0.99883	0.0023455	0.013143
GGGGGAATGGTAGTAACGAA	000045490	Usp8	68.659	21.358	-1.6395	0.064212	0.93579	0.12842	0.26097
GAATACAAGCGGTAAGCCCG	000078587	LOC100862015	185.02	6.6249	-4.6086	0.00094171	0.99906	0.0018834	0.01111
GAACGGGAATTTGGCCACCC	000078586	LOC100862015	96.363	3.9749	-4.2906	0.003469	0.99653	0.0069379	0.029902
GATGGCACCATCAATGCAGA	000078588	LOC100862015	208.14	21.2	-3.2359	0.0027088	0.99729	0.0054176	0.024826
GATGGCACCATCAATGCAGA	000078588	LOC100862015	251.75	89.148	-1.4874	0.021602	0.9784	0.043204	0.11843
GGCCAAACCGAAGTCCACCA	000002567	Cdc7	151.81	0.92863	-6.3081	0.00021978	0.99978	0.00043955	0.0035386
GGCCAAACCGAAGTCCACCA	000002567	Cdc7	63.599	1.325	-4.7962	0.0026866	0.99731	0.0053732	0.024676
TCTGCAGCGTTTGCCTGTCG	000002568	Cdc7	238.02	13.25	-4.0681	0.00085921	0.99914	0.0017184	0.010335
TCTGCAGCGTTTGCCTGTCG	000002568	Cdc7	551.56	36.216	-3.8921	4.8401e-05	0.99995	9.6801e-05	0.0010118
CCGGCAGGTGGCATCCCATG	000021265	Prpf19	218.95	4.6431	-5.2845	0.00034813	0.99965	0.00069626	0.0051171
CATTGCCCGGCTCACCAAAG	000021264	Prpf19	379.67	14.575	-4.6113	0.00011779	0.99988	0.00023557	0.00213
AATCCTGATAGTAGCATCAG	000021262	Prpf19	242.6	9.2863	-4.5657	0.00051574	0.99948	0.0010315	0.0069681
AATCCTGATAGTAGCATCAG	000021262	Prpf19	482.78	177.55	-1.438	0.0069661	0.99303	0.013932	0.050636
GTCTGGGATCGAACCAAGTG	000042711	Gid8	470.25	30.474	-3.9042	9.9696e-05	0.9999	0.00019939	0.0018577
CAGACACAACTGGCAGAGCA	000042709	Gid8	277.52	19.875	-3.738	0.00077969	0.99922	0.0015594	0.0095827
GAGGCTGTTGATCAAGGCAA	000042710	Gid8	128.16	30.474	-2.0369	0.02378	0.97622	0.04756	0.12721
CAGACACAACTGGCAGAGCA	000042709	Gid8	297.52	125.36	-1.2403	0.02809	0.97191	0.05618	0.14381
AGGCTATTTCAGAAAGAGAA	000074803	Gm5796	60.268	0.92863	-4.9895	0.0020697	0.99793	0.0041394	0.02024
AAGAACTGAAATTGGATATG	000074801	Gm5796	74	1.8573	-4.7142	0.0027959	0.9972	0.0055917	0.025428
AGACCAAAAAAGAAGGAAGA	000074802	Gm5796	152.25	7.9498	-4.0979	0.0021854	0.99781	0.0043708	0.021097
AGACCAAAAAAGAAGGAAGA	000074802	Gm5796	167.07	35.288	-2.2115	0.013364	0.98664	0.026727	0.082588
GATATGCTACAGGACCTTCG	000014384	Rad51d	719.83	194.77	-1.8805	0.00056827	0.99943	0.0011365	0.0075199
AGAGATCTGCGCCATTTAAG	000014383	Rad51d	949.03	261.87	-1.8536	0.00019167	0.99981	0.00038333	0.0031688
ACAGGCTAGAACCCAAGATG	000014382	Rad51d	683.21	249.1	-1.452	0.0026902	0.99731	0.0053804	0.024702
TGATGCTGGCCTCTATACTG	000014385	Rad51d	476.04	198.73	-1.2561	0.012095	0.98791	0.02419	0.076642
CAATAACATTGTCAAAACAA	000019426	Ash2l	142.62	9.2748	-3.805	0.0032041	0.9968	0.0064082	0.028165
GCTCCGGAGAGGCCGAAAGT	000019427	Ash2l	250.54	19.875	-3.591	0.0011994	0.9988	0.0023989	0.013369
TGCAATGTGTGCCATCACAG	000019428	Ash2l	340.16	111.3	-1.6031	0.0099839	0.99002	0.019968	0.066416
TTACACACCTCGATCATGTA	000019429	Ash2l	646.59	238.5	-1.4351	0.003335	0.99666	0.00667	0.029041
CTGTTGGGACATACCGCTCG	000007751	Hnrnpk	99.175	0.92863	-5.6988	0.00069889	0.9993	0.0013978	0.0088127
GATGATATGAGCCCTCGTCG	000007752	Hnrnpk	450.01	26.499	-4.0357	0.00010461	0.9999	0.00020921	0.0019306
CTGTTGGGACATACCGCTCG	000007751	Hnrnpk	74.199	3.9749	-3.918	0.0063092	0.99369	0.012618	0.047056
ATCCCTACCTTGGAAGAGGT	000007750	Hnrnpk	184.05	18.55	-3.2427	0.0034781	0.99652	0.0069561	0.029965
GTTGCAGTCTTGAGCACTGG	000076670	Gm12886	343.05	18.55	-4.1374	0.00026777	0.99973	0.00053554	0.0041453
GTTAGAGATCGCTGCAATCG	000076669	Gm12886	489.01	146.72	-1.7299	0.0031043	0.9969	0.0062085	0.027505
GTTGCAGTCTTGAGCACTGG	000076670	Gm12886	423.4	202.44	-1.0608	0.026223	0.97378	0.052446	0.13675
TTGTGATGCCAAGTTGCCTG	000076671	Gm12886	641.78	317.99	-1.0108	0.01529	0.98471	0.030579	0.09146
GCAGAGAAAGTAGCAATCGG	000041828	Ep400	358.47	11.925	-4.7977	0.00012293	0.99988	0.00024586	0.0022068
AATGGTCATAAGGTTACACA	000041826	Ep400	271.59	10.215	-4.6032	0.00036406	0.99964	0.00072812	0.0053016
AATGGTCATAAGGTTACACA	000041826	Ep400	144.54	11.925	-3.4932	0.0042079	0.99579	0.0084157	0.034621
GCAGAGAAAGTAGCAATCGG	000041828	Ep400	38.907	2.7859	-3.3979	0.014443	0.98556	0.028886	0.087605
TCCACATGAACGCTACCCAG	000009275	Kin	185.38	5.5718	-4.8258	0.0007692	0.99923	0.0015384	0.0094849
TCCACATGAACGCTACCCAG	000009275	Kin	225.49	9.2748	-4.4623	0.00068401	0.99932	0.001368	0.0086751
CCAAAAGCAATGCCGCGACG	000009274	Kin	242.6	78.933	-1.6076	0.018319	0.98168	0.036639	0.10489
TGGTCCCAAAGAGCTTGACT	000009276	Kin	345.59	255.37	-0.43497	0.18287	0.81713	0.36573	0.53877
CAGGCACGATACAGCCTGAG	000018298	Tyms	540.59	15.9	-5.0021	1.7346e-05	0.99998	3.4692e-05	0.00041629
TCACCACATAGAACTGACAG	000018300	Tyms	112.14	4.6431	-4.3255	0.0028113	0.99719	0.0056227	0.025531
GACAATTCTACAGATTACTC	000018299	Tyms	526.14	37.099	-3.7904	6.8231e-05	0.99993	0.00013646	0.0013554
TTCAAGAAGGAGGACCGCAC	000018301	Tyms	172.41	31.573	-2.4124	0.0098922	0.99011	0.019784	0.065956
ACCTCGTCCACATTGAAGCG	000030154	Cdt1	185.98	3.9749	-5.2321	0.00052462	0.99948	0.0010492	0.0070658
ACCTCGTCCACATTGAAGCG	000030154	Cdt1	160.21	4.6431	-4.8363	0.0010115	0.99899	0.0020231	0.011735
GATACTTGTAGGGTAGGACA	000030156	Cdt1	75.163	2.6499	-4.3831	0.0039434	0.99606	0.0078868	0.032965
TGGCGGAAGCGATACGACGT	000030157	Cdt1	77.09	3.9749	-3.9724	0.005806	0.99419	0.011612	0.044214
GCGAACAGGCCTCCTAAAGT	000046238	Prcc	358.47	23.85	-3.8546	0.00030537	0.99969	0.00061074	0.0046072
GGTGACCAAGCAGATAACAC	000046239	Prcc	64.563	3.9749	-3.7201	0.0084418	0.99156	0.016884	0.058503
AACCGAACCGGTTAGGATAG	000046236	Prcc	243.8	19.875	-3.5518	0.0013401	0.99866	0.0026802	0.01455
ACCCAAAACAGGAGCAAGTG	000046237	Prcc	205.25	23.85	-3.0531	0.0033966	0.9966	0.0067932	0.029418
TACAAGCGCAGCGACCTCCG	000053899	Atg9b	511.69	43.724	-3.5189	0.00010749	0.99989	0.00021499	0.001974
CAGGTAGCGTTAGCCAACAA	000053897	Atg9b	383.73	60.361	-2.6485	0.001079	0.99892	0.002158	0.012319
AGTGCTCACCATCTACGATG	000053896	Atg9b	604.19	335.22	-0.848	0.030817	0.96918	0.061634	0.15397
TACAAGCGCAGCGACCTCCG	000053899	Atg9b	330.33	199.65	-0.72355	0.088496	0.9115	0.17699	0.32765
TCTTTATGTCCAATGCCATG	000021517	Ninj2	403.76	49.024	-3.0164	0.00053566	0.99946	0.0010713	0.0071795
GGCAGAGAGCATGCTAGACG	000021515	Ninj2	197.54	33.124	-2.5406	0.0066375	0.99336	0.013275	0.048816
TAGCACAGGCACTCCATGCG	000021516	Ninj2	187.91	37.099	-2.3098	0.0097196	0.99028	0.019439	0.065081
TCTTTATGTCCAATGCCATG	000021517	Ninj2	415.01	134.65	-1.6167	0.0062535	0.99375	0.012507	0.046732
TGTCAAGTTGCCTAATTCCG	000044266	Uvrag	606.12	35.774	-4.0452	2.5172e-05	0.99997	5.0345e-05	0.00057524
TTCATCAACAGAATCCGACG	000044267	Uvrag	148.4	9.2748	-3.862	0.0028425	0.99716	0.005685	0.025733
TGTCAAGTTGCCTAATTCCG	000044266	Uvrag	637.77	91.005	-2.7955	0.0001135	0.99989	0.00022701	0.0020653
AGGTATCCCATAATTCACAA	000044264	Uvrag	531.73	296.23	-0.84182	0.03759	0.96241	0.07518	0.17815
TCGGCAGGTATACTGAGGGA	000028524	Dda1	999.38	196.87	-2.3379	3.0261e-05	0.99997	6.0522e-05	0.00067466
TCTGACGGGTACTCTCGGGT	000028525	Dda1	702.62	211.73	-1.7258	0.00099832	0.999	0.0019966	0.011615
TCTGACGGGTACTCTCGGGT	000028525	Dda1	739.1	312.69	-1.2384	0.0047141	0.99529	0.0094281	0.037693
CCTTGCACACAGAGTCCGCG	000028523	Dda1	681.28	351.12	-0.95431	0.016987	0.98301	0.033974	0.099054
CCTCAAGAGACTATATGACA	000058001	Smg5	377.74	13.25	-4.7322	0.00010737	0.99989	0.00021474	0.0019721
CATCCTCGTTGGTTAGACCA	000058000	Smg5	509.76	42.399	-3.5569	0.00010431	0.9999	0.00020862	0.0019268
CCTCAAGAGACTATATGACA	000058001	Smg5	141.9	42.717	-1.7087	0.032417	0.96758	0.064833	0.15972
CTACTATCAAGCCTTGTCAG	000058002	Smg5	344.01	149.72	-1.1948	0.0252	0.9748	0.0504	0.13273
CTGAGAGGAATGAAGGACGA	000029137	Gm17019	97.326	0	-6.6195	0.00073157	0.99927	0.0014631	0.0091322
ATTTCTGCACAACTTAGAGA	000029135	Gm17019	193.69	6.6249	-4.6743	0.00080435	0.9992	0.0016087	0.0098277
ATGGGAGAGATACCAGAGAG	000029134	Gm17019	96.363	9.2748	-3.2443	0.0092784	0.99072	0.018557	0.06287
ATTTCTGCACAACTTAGAGA	000029135	Gm17019	50.35	118.86	1.223	0.99175	0.0082514	0.016503	0.057472
TCAAATACGACTGCCCGCAG	000022109	Keap1	546.22	22.287	-4.5545	2.5217e-05	0.99997	5.0433e-05	0.00057608
GGGCCGCCTCATCTACACAG	000022108	Keap1	707.3	34.449	-4.3205	7.7622e-06	0.99999	1.5524e-05	0.00020461
GGGCCGCCTCATCTACACAG	000022108	Keap1	704.9	69.647	-3.3208	2.8348e-05	0.99997	5.6697e-05	0.00063735
GGCACGCTCATAGAGGCACA	000022107	Keap1	576.25	172.25	-1.7364	0.0018757	0.99812	0.0037515	0.018794
TGAAACTAAGGAGCAGTGGA	000022689	Zwint	780.54	31.799	-4.5746	3.1902e-06	1	6.3805e-06	9.2524e-05
CCCACGGTAAACAGAACTCG	000022686	Zwint	154.1	5.5718	-4.5608	0.0013984	0.9986	0.0027968	0.015031
CCTGCAGAAGCGAGTCCTTG	000022687	Zwint	254.4	27.824	-3.1474	0.0018534	0.99815	0.0037069	0.018625
CCCACGGTAAACAGAACTCG	000022686	Zwint	183.09	52.999	-1.7694	0.021508	0.97849	0.043016	0.11805
GTTGGTGGGGACAAGAACGG	000014932	Rpl6	149.53	1.8573	-5.7192	0.00046986	0.99953	0.00093972	0.0064821
TTCCGAGGAACATCTTCGGT	000014933	Rpl6	73.237	0.92863	-5.2665	0.0013927	0.99861	0.0027853	0.014986
ATCCTCACTGGGCGCCACAG	000014931	Rpl6	29.872	0	-4.9482	0.0068501	0.99315	0.0137	0.049979
TTCCGAGGAACATCTTCGGT	000014933	Rpl6	47.218	5.2999	-2.9362	0.021302	0.9787	0.042604	0.11723
GAGCAGGAGCTGTGTAATGA	000034900	Rpain	696.7	34.449	-4.2988	8.6988e-06	0.99999	1.7398e-05	0.00022623
AAGTTGTCTCAGGAGAATGT	000034898	Rpain	517.47	113.95	-2.1733	0.00092304	0.99908	0.0018461	0.010938
AAGTTGTCTCAGGAGAATGT	000034898	Rpain	347.11	189.44	-0.87022	0.057397	0.9426	0.11479	0.241
GTCTGTGGAGAATTGTCCGG	000034901	Rpain	719.4	425.31	-0.75689	0.034197	0.9658	0.068395	0.16622
GGTATTACAGTAAACCACGC	000014636	Upf1	44.327	0	-5.5023	0.0036341	0.99637	0.0072681	0.030951
TGCTCCAAGTAACATCGCTG	000014637	Upf1	326.67	10.6	-4.8201	0.0001671	0.99983	0.0003342	0.0028387
AGTGACCCACAACTTCCAAG	000014634	Upf1	137.8	14.575	-3.1557	0.0063125	0.99369	0.012625	0.047073
GGTATTACAGTAAACCACGC	000014636	Upf1	15.258	1.8573	-2.5084	0.035431	0.96457	0.070862	0.17063
GATGACGAGATCATCAACCC	000046861	Ppp1r8	847.56	104.93	-3.0018	1.6727e-05	0.99998	3.3453e-05	0.00040289
GGACTCGAGAGCATGACTGG	000046862	Ppp1r8	242.6	36.216	-2.7105	0.0034919	0.99651	0.0069838	0.030051
AATGAGACCGTAGAATCGAT	000046860	Ppp1r8	834.59	391.88	-1.0887	0.0064086	0.99359	0.012817	0.047582
GGACTCGAGAGCATGACTGG	000046862	Ppp1r8	518.43	246.45	-1.0698	0.018319	0.98168	0.036637	0.10489
CCAGTACAAAGTGTGGTACG	000001859	Cacna1c	220.67	13.25	-3.9594	0.0011508	0.99885	0.0023015	0.01295
CCAGTAAATTCCAACCATTG	000001858	Cacna1c	483.74	42.399	-3.4815	0.00014417	0.99986	0.00028834	0.0025156
GACATCGAGGGAGAAAACTG	000001860	Cacna1c	423.4	85.434	-2.2958	0.0014163	0.99858	0.0028327	0.015173
AATCAGGGTGGATAAGACGT	000001857	Cacna1c	593.59	219.95	-1.4282	0.0043016	0.9957	0.0086031	0.035171
GAACGTTTGAGCAACCTGGT	000033727	Med27	579.14	26.499	-4.3989	2.1869e-05	0.99998	4.3738e-05	0.00050951
GAAGGTGTTGAAAGTCATTG	000033728	Med27	421.1	25.174	-4.0114	0.0001412	0.99986	0.00028239	0.0024742
GTCTTCGACTGCCTTAAGGA	000033729	Med27	762.88	202.44	-1.9087	0.00041358	0.99959	0.00082716	0.0058579
GAAGGTGTTGAAAGTCATTG	000033728	Med27	586.66	156.94	-1.8956	0.0011522	0.99885	0.0023044	0.012962
AGAAAAGCCTGGTAAATCCG	000022562	Ddx56	214.89	2.6499	-5.8863	0.00020446	0.9998	0.00040892	0.0033429
CATCGGAATAGCATAAGCTG	000022564	Ddx56	115.2	2.7859	-4.9398	0.0015018	0.9985	0.0030036	0.015866
CATCGGAATAGCATAAGCTG	000022564	Ddx56	115.64	7.9498	-3.704	0.0048145	0.99519	0.009629	0.038333
CAAGTCAAAGGCAAACGTCG	000022563	Ddx56	58.781	245.12	2.0416	1	1.5505e-09	3.1009e-09	8.5215e-08
CTAATAGCATCACTCAGCTA	000049944	Cse1l	108.89	3.9749	-4.4652	0.0025553	0.99744	0.0051106	0.023756
GCTGCTTGTGATCTTGTACG	000049945	Cse1l	210.07	13.25	-3.8887	0.0013828	0.99862	0.0027657	0.014901
GGTACTGCACAGTTCAATGG	000049947	Cse1l	135.79	16.715	-2.9489	0.007952	0.99205	0.015904	0.05589
GCTGCTTGTGATCTTGTACG	000049945	Cse1l	235.73	62.218	-1.9048	0.011601	0.9884	0.023201	0.074284
GGAGTGTGCAGACGCTGGCG	000046194	Dtnbp1	361.36	21.2	-4.0288	0.00024829	0.99975	0.00049658	0.0039059
ATGGAACAGTACCTGTCCAC	000046192	Dtnbp1	308.36	41.074	-2.8783	0.0015221	0.99848	0.0030443	0.016032
TCTAGTCCAGCAGAGTACTT	000046195	Dtnbp1	319.92	49.024	-2.6815	0.0017834	0.99822	0.0035668	0.018078
GGAGTGTGCAGACGCTGGCG	000046194	Dtnbp1	277.69	66.861	-2.038	0.0067486	0.99325	0.013497	0.049423
TAACTTCTTCGTTGACACAG	000018593	Uxt	607.08	39.749	-3.8994	2.9518e-05	0.99997	5.9037e-05	0.00066001
CCTATAGGAAACTAATCACT	000018591	Uxt	497.23	34.449	-3.813	8.6208e-05	0.99991	0.00017242	0.0016471
CAGGAAAAAACCATATCCCA	000018590	Uxt	457.72	33.124	-3.7487	0.00013304	0.99987	0.00026607	0.0023549
GGTGCTGGATCATCGAGACA	000018592	Uxt	391.23	165.62	-1.2351	0.018447	0.98155	0.036894	0.1054
AACCTACATCCCCCCCAAAG	000007645	Hmgb1	96.363	1.325	-5.3881	0.0010801	0.99892	0.0021602	0.01233
CTCAGAACAGAACAAGAAGA	000007646	Hmgb1	11.564	1.325	-2.434	0.034423	0.96558	0.068847	0.16702
AACCTACATCCCCCCCAAAG	000007645	Hmgb1	142.66	48.289	-1.5433	0.040744	0.95926	0.081488	0.18876
CTCAGAACAGAACAAGAAGA	000007646	Hmgb1	212.84	106.79	-0.98831	0.070751	0.92925	0.1415	0.27988
CAGTTCTGTTTATCCCACAA	000010453	Mcm3	342.09	9.2748	-5.0614	0.00011462	0.99989	0.00022924	0.0020819
CAGTTCTGTTTATCCCACAA	000010453	Mcm3	241.07	7.429	-4.8439	0.00040765	0.99959	0.0008153	0.0057926
GTGACAGAATACAGGTGGTG	000010454	Mcm3	569.11	113.29	-2.3185	0.00047522	0.99952	0.00095043	0.0065432
TGATCAGTATAAGACGCCCA	000010455	Mcm3	308.36	141.77	-1.1156	0.035673	0.96433	0.071345	0.17149
TGAGGTTAGATTCAATCAGG	000037349	1700001F09Rik	122.38	0	-6.947	0.00040718	0.99959	0.00081436	0.0057883
AGAACGAGAAAAGAATCAAG	000037347	1700001F09Rik	20.236	0	-4.4085	0.011866	0.98813	0.023731	0.075533
AATGAGAGAGACATTCTCCA	000037346	1700001F09Rik	191.76	13.25	-3.7578	0.001919	0.99808	0.003838	0.019113
AGAACGAGAAAAGAATCAAG	000037347	1700001F09Rik	19.072	0.92863	-3.3795	0.01283	0.98717	0.025659	0.080107
GTGTCGAAGAGACTTGAAGC	000054851	Flcn	556.01	33.124	-4.0288	3.9892e-05	0.99996	7.9783e-05	0.00085925
AGATGGGGCCTTCACGACCA	000054848	Flcn	1531.1	408.6	-1.9032	1.1292e-05	0.99999	2.2585e-05	0.00028488
AGATGGGGCCTTCACGACCA	000054848	Flcn	1127.4	389.54	-1.5308	0.00033026	0.99967	0.00066051	0.0049082
GATGTCCACAGCGTGCCCAG	000054849	Flcn	686.59	250.73	-1.4497	0.0026723	0.99733	0.0053446	0.024572
CCTTCACAAACACCCAGCGT	000036248	Fam47c	611.9	43.724	-3.7765	3.2808e-05	0.99997	6.5615e-05	0.00072401
AGTGAAGGTATGATCATTCG	000036246	Fam47c	597.45	55.649	-3.4011	6.0238e-05	0.99994	0.00012048	0.0012171
ATACTGTATTTACGTGACCC	000036247	Fam47c	764.16	176.22	-2.1102	0.00022837	0.99977	0.00045674	0.0036534
ATACTGTATTTACGTGACCC	000036247	Fam47c	321.17	176.44	-0.86052	0.063784	0.93622	0.12757	0.25974
AGCTGGCCGAGCTGGTTAAG	000035370	Meaf6	434.84	21.358	-4.2849	9.3707e-05	0.99991	0.00018741	0.001765
ATGTATGGCAATATTATCCG	000035371	Meaf6	455.8	27.824	-3.9862	0.0001044	0.9999	0.0002088	0.0019281
CGCCGGGTGTCTGGGATCTG	000035373	Meaf6	503.01	137.8	-1.8605	0.00207	0.99793	0.0041401	0.020243
CGCCGGGTGTCTGGGATCTG	000035373	Meaf6	538.6	256.3	-1.0684	0.017202	0.9828	0.034403	0.09996
AAATGAAGAAAACAGCATGT	000032286	Ncbp2	179.23	31.799	-2.4581	0.0087605	0.99124	0.017521	0.060168
TCACCCGAAAGTGCTGGTCC	000032289	Ncbp2	418.82	93.791	-2.147	0.0019387	0.99806	0.0038774	0.019255
CAGATGCGGAGAACGCAATG	000032287	Ncbp2	22.163	6.6249	-1.6031	0.092308	0.90769	0.18462	0.33759
AAATGAAGAAAACAGCATGT	000032286	Ncbp2	313.54	117.01	-1.4144	0.017545	0.98245	0.03509	0.10148
GAATACAACATGCCTAAAGA	000022936	Exoc7	285.23	27.824	-3.3118	0.0011326	0.99887	0.0022653	0.012789
GCTGGCTGGTGGAATATGGT	000022937	Exoc7	527.92	117.94	-2.1529	0.00089918	0.9991	0.0017984	0.010713
ACTGCGGAACTCCGACTCCA	000022934	Exoc7	788.82	223.8	-1.8129	0.00048828	0.99951	0.00097657	0.0066791
ACTGCGGAACTCCGACTCCA	000022934	Exoc7	1076.4	409.42	-1.3924	0.00075413	0.99925	0.0015083	0.0093403
CCAGGACAGAGGTATCACCT	000021255	Exosc5	160.93	5.2999	-4.6839	0.0011552	0.99884	0.0023105	0.012985
CAGGAATACCTGTGAAGCTG	000021254	Exosc5	141.65	7.9498	-3.9945	0.0027174	0.99728	0.0054348	0.024878
CCTCAGGATCACTTCAAGGG	000021257	Exosc5	124.31	10.6	-3.4333	0.0056177	0.99438	0.011235	0.043115
CCCCCGGACCTCAATCACCG	000021256	Exosc5	245.72	22.525	-3.3907	0.001553	0.99845	0.003106	0.016285
TACGAACTATAGAGTTAGAT	000014249	Rab1	227.42	10.6	-4.2995	0.00077746	0.99922	0.0015549	0.0095623
CCTTCAATAACGTTAAACAG	000014248	Rab1	307.44	16.715	-4.1219	0.00039117	0.99961	0.00078235	0.0056137
CCTTCAATAACGTTAAACAG	000014248	Rab1	323.78	19.875	-3.9596	0.00038814	0.99961	0.00077628	0.005578
TACGAACTATAGAGTTAGAT	000014249	Rab1	141.9	293.45	1.043	0.99668	0.0033186	0.0066373	0.028936
CCACGAGACACTGTACCAGA	000000626	Aldoa	30.515	0	-4.978	0.0066342	0.99337	0.013268	0.0488
AATGGCGAGACAACTACCCA	000000625	Aldoa	51.113	0.92863	-4.756	0.0028232	0.99718	0.0056464	0.025603
CCACGAGACACTGTACCAGA	000000626	Aldoa	54.927	1.325	-4.5883	0.003569	0.99643	0.0071381	0.030532
CCTTGCCCGGAGCCACAATG	000000627	Aldoa	26.701	0.92863	-3.8443	0.0080805	0.99192	0.016161	0.056585
ATGTAACTGAAGCTATATGT	000042306	Vmp1	389.31	7.9498	-5.4466	5.0276e-05	0.99995	0.00010055	0.0010457
TGACCAGATTATCTGCCCAG	000042309	Vmp1	570.64	39.931	-3.8038	4.5352e-05	0.99995	9.0705e-05	0.00095789
ATGTAACTGAAGCTATATGT	000042306	Vmp1	382.2	105.86	-1.8423	0.0046097	0.99539	0.0092193	0.037071
TCTTCTCATGAACTGAAGAG	000042308	Vmp1	127.2	222.6	0.80251	0.96661	0.033393	0.066785	0.16326
AAAGGAGAAAGTGCGCAGTG	000049356	Gins4	527.1	13.25	-5.2118	1.625e-05	0.99998	3.2501e-05	0.00039285
GACACCGCAAATAGCTGCTG	000049357	Gins4	582.08	21.358	-4.7048	1.5697e-05	0.99998	3.1393e-05	0.00038074
GACACCGCAAATAGCTGCTG	000049357	Gins4	446.16	31.799	-3.769	0.00014473	0.99986	0.00028945	0.002523
GGACTCTGATGGGGGTAGTG	000049358	Gins4	565.3	207.08	-1.4444	0.0046456	0.99535	0.0092912	0.037291
TATCGCTGGCTCAACTATGG	000013635	Prim1	138.08	9.2863	-3.7571	0.0035308	0.99647	0.0070617	0.030306
GGAGTACTTGAGTCTTGTAA	000013634	Prim1	433.32	104.01	-2.0483	0.0021326	0.99787	0.0042652	0.020712
TGACAGACTACGATGACGTA	000013637	Prim1	327.63	113.95	-1.5155	0.012993	0.98701	0.025986	0.08087
TGACAGACTACGATGACGTA	000013637	Prim1	121.3	214.51	0.81737	0.96764	0.032358	0.064716	0.15952
GTGGAATAACCGGCTACTGA	000014356	Rad21	688.99	39.749	-4.0817	1.1854e-05	0.99999	2.3708e-05	0.0002974
TAATGCCATTACTTTACCTG	000014357	Rad21	1777.5	348.23	-2.3484	4.9832e-07	1	9.9664e-07	1.7273e-05
GTGGAATAACCGGCTACTGA	000014356	Rad21	437.89	198.73	-1.1359	0.020011	0.97999	0.040022	0.1119
GACAACTCTCGTCCCAAACG	000014355	Rad21	700.33	325.95	-1.101	0.0091054	0.99089	0.018211	0.061978
CTTACTTGTCTCTCATCATG	000045810	Smarca5	1145.8	72.874	-3.9564	3.9722e-07	1	7.9444e-07	1.4092e-05
ACACCGTAGAACGGAGCAAG	000045808	Smarca5	294.87	26.499	-3.4275	0.00090555	0.99909	0.0018111	0.010777
CTTACTTGTCTCTCATCATG	000045810	Smarca5	1272.5	325.02	-1.9658	2.6846e-05	0.99997	5.3692e-05	0.00060866
ACACCGTAGAACGGAGCAAG	000045808	Smarca5	292.95	143.01	-1.0294	0.046606	0.95339	0.093213	0.20788
TATCCTAGGTCACTATTGTG	000014857	Rpa2	185.98	5.2999	-4.8914	0.0007195	0.99928	0.001439	0.0090142
GGGCGACCCGAAGCCACCGG	000014855	Rpa2	3.0515	97.506	4.6037	1	2.1632e-91	4.3265e-91	5.8177e-88
GGTACAGGGCACAATATGCT	000014856	Rpa2	222.6	15.9	-3.7258	0.0014115	0.99859	0.002823	0.01513
ACTTTCACGTATGTTTCGGG	000014854	Rpa2	590.7	124.55	-2.2366	0.00049085	0.99951	0.00098169	0.006706
CCAGGAATATAGAACAAATG	000013358	Pnn	427.85	29.149	-3.8303	0.00016057	0.99984	0.00032115	0.0027471
GCGTAATGAAGAACAGAAGG	000013360	Pnn	271.74	42.399	-2.6518	0.0028674	0.99713	0.0057348	0.025901
CGTGGATTCTCAGATAGTGG	000013359	Pnn	442.3	90.098	-2.2828	0.0012605	0.99874	0.0025211	0.013888
CGTGGATTCTCAGATAGTGG	000013359	Pnn	249.46	114.22	-1.1202	0.045856	0.95414	0.091713	0.20553
ATGGGTACATCCCATAAAGG	000027103	Tsc1	679.73	100.29	-2.7486	9.0886e-05	0.99991	0.00018177	0.0017208
AAGAGAAGGACATACAGATG	000027102	Tsc1	722.45	234.94	-1.6165	0.0012914	0.99871	0.0025829	0.014156
ATGGGTACATCCCATAAAGG	000027103	Tsc1	840.28	290.17	-1.5307	0.0010381	0.99896	0.0020762	0.011964
GGAGAGTCAAAGCCCCCTCG	000027105	Tsc1	317.36	130.01	-1.281	0.023231	0.97677	0.046463	0.12498
TCTCTCGATTCATACCCCCG	000004964	Epb4.1l2	57.216	1.8573	-4.3487	0.0047046	0.9953	0.0094091	0.037645
TCTCTCGATTCATACCCCCG	000004964	Epb4.1l2	76.126	6.6249	-3.3384	0.010697	0.9893	0.021395	0.069949
CCTCGAGACACGTTTACTAG	000004962	Epb4.1l2	252.51	64.075	-1.9619	0.0092928	0.99071	0.018586	0.062934
AAATACCTTGAGAGTAGACG	000004961	Epb4.1l2	405.69	147.07	-1.4576	0.009714	0.99029	0.019428	0.065051
AGTGACCATTCATTAACCTG	000028974	Chmp3	386.41	29.149	-3.6837	0.00027941	0.99972	0.00055882	0.0042898
AGTGACCATTCATTAACCTG	000028974	Chmp3	661.42	243.3	-1.4391	0.0030867	0.99691	0.0061733	0.027386
TATTCAGGCTGGAATCATAG	000028977	Chmp3	432.67	181.52	-1.2485	0.014855	0.98515	0.029709	0.08949
ATGGGCATGAAGAACCAACT	000028975	Chmp3	959.77	410.74	-1.2225	0.0024304	0.99757	0.0048607	0.022873
GACTGATGGGAAAACCTCGG	000038634	Lin9	238.98	9.2748	-4.5457	0.00054642	0.99945	0.0010928	0.0072932
GGGGTAGAGGGATTTCATCG	000038637	Lin9	231.15	14.858	-3.8718	0.0011164	0.99888	0.0022329	0.012647
GGGGTAGAGGGATTTCATCG	000038637	Lin9	195.62	19.875	-3.2356	0.0030949	0.99691	0.0061899	0.027436
GACTGATGGGAAAACCTCGG	000038634	Lin9	134.27	44.574	-1.5695	0.041753	0.95825	0.083505	0.19218
GAGCCAAAATGATACACAAG	000046577	Clp1	118.53	9.2748	-3.5401	0.0054278	0.99457	0.010856	0.042024
GAGTAGCAGTCGACACACAG	000046578	Clp1	289.09	45.049	-2.6552	0.002437	0.99756	0.0048739	0.022923
GGCCGACGCTGCGTGCACCA	000046579	Clp1	276.56	113.95	-1.2718	0.029091	0.97091	0.058181	0.14755
CCAAGGCTGTATGAGTGTTG	000046576	Clp1	381.44	157.87	-1.2674	0.017723	0.98228	0.035445	0.10229
CACTGGGACACATTGCTTAG	000016715	Ssrp1	214.37	6.5004	-4.8437	0.00054733	0.99945	0.0010947	0.0073016
CACTGGGACACATTGCTTAG	000016715	Ssrp1	112.74	7.9498	-3.6678	0.0051503	0.99485	0.010301	0.040374
GGGCATGTCTACAAGTACGA	000016716	Ssrp1	303.63	52.932	-2.4978	0.0026714	0.99733	0.0053429	0.024566
AAGTAGAAAAGCGCTTTGAG	000016714	Ssrp1	278.49	148.4	-0.90363	0.066089	0.93391	0.13218	0.26646
CAAGAGTGAGATGACCCCAG	000048676	Snrpd2	39.509	1.325	-4.1229	0.00638	0.99362	0.01276	0.047431
GACTGCGTGAGCACTGAGAG	000048678	Snrpd2	385.45	23.85	-3.959	0.00021035	0.99979	0.00042071	0.0034174
CCCCATCAGGCACTGCAACA	000048677	Snrpd2	214.89	18.55	-3.4651	0.0019892	0.99801	0.0039783	0.019631
TGTGAAGGAGATGTGGACTG	000048679	Snrpd2	248.62	33.124	-2.8708	0.0027073	0.99729	0.0054145	0.02482
TCTCGTTGTAGGGATGCTAA	000044323	Naa35	67.454	1.325	-4.8798	0.0023851	0.99761	0.0047703	0.022557
ATTCACACCTCATTGCACCA	000044321	Naa35	3169.4	987.11	-1.6819	1.6257e-07	1	3.2514e-07	6.2035e-06
ATTCACACCTCATTGCACCA	000044321	Naa35	3681.7	1216.5	-1.5968	8.5098e-08	1	1.702e-07	3.441e-06
TCAGATCCATGGCCATAACA	000044322	Naa35	887.23	364.95	-1.2793	0.0023959	0.9976	0.0047918	0.022636
ATGCAGCCTCGTACACGCAG	000024524	Eif3c	258.25	17.225	-3.8304	0.00086987	0.99913	0.0017397	0.010436
AGGGTTGTAATCGTAGAGAG	000024522	Eif3c	420.35	56.646	-2.8697	0.00056968	0.99943	0.0011394	0.0075358
AGTATTCGGATGTAGAATCG	000024523	Eif3c	351.72	121.9	-1.5211	0.011184	0.98882	0.022368	0.072244
AGTATTCGGATGTAGAATCG	000024523	Eif3c	335.67	182.94	-0.8721	0.059173	0.94083	0.11835	0.24621
GGAGGCTCACACCTGAACTG	000055757	Haus4	164.78	15.9	-3.2942	0.0040742	0.99593	0.0081484	0.033798
TCTTCCGTCAGGGCACACGG	000055758	Haus4	485.67	143.1	-1.7559	0.0029657	0.99703	0.0059314	0.026556
AAGTGGCTTGAGCCTCACGC	000055756	Haus4	596.57	189.44	-1.6498	0.0021561	0.99784	0.0043121	0.02088
TGTGCCTCTAGGATTTCGTG	000055759	Haus4	447.12	178.87	-1.3169	0.011526	0.98847	0.023051	0.073912
TCCCGTCAGCACAGTTCGTG	000002632	Cdk4	479.89	17.225	-4.7217	3.9902e-05	0.99996	7.9803e-05	0.00085941
GTCTACATACGCAACACCCG	000002631	Cdk4	180.8	17.644	-3.2856	0.0034481	0.99655	0.0068963	0.029771
TCCCGTCAGCACAGTTCGTG	000002632	Cdk4	257.85	75.219	-1.7639	0.012485	0.98752	0.02497	0.07852
GTCTACATACGCAACACCCG	000002631	Cdk4	390.27	161.65	-1.2664	0.017069	0.98293	0.034139	0.099425
TTCAACAAAGCCATAGCCTG	000048683	Sf3b4	196.58	15.9	-3.5474	0.002233	0.99777	0.004466	0.021462
AGGGTCCCGCATGATCTTGG	000048680	Sf3b4	201.4	17.225	-3.4732	0.0022813	0.99772	0.0045625	0.021812
CATCGGCAAACAGCTGGTGA	000048681	Sf3b4	193.01	97.506	-0.97785	0.078579	0.92142	0.15716	0.3014
TTCAACAAAGCCATAGCCTG	000048683	Sf3b4	176.23	92.863	-0.91697	0.09454	0.90546	0.18908	0.34326
CATTATGACAGTGAAAAAGG	000014487	Rbbp4	671.65	94.073	-2.8227	8.3925e-05	0.99992	0.00016785	0.001611
TCTTGGAATCCAAATCTCAG	000014489	Rbbp4	342.09	47.699	-2.8166	0.0012155	0.99878	0.0024309	0.013508
CTGAGCCAAATAGAGACTCG	000014488	Rbbp4	1106.2	237.73	-2.2134	2.4602e-05	0.99998	4.9204e-05	0.00056403
CTGAGCCAAATAGAGACTCG	000014488	Rbbp4	838.36	307.39	-1.4445	0.0014587	0.99854	0.0029174	0.015534
CTTGCATGCTGAGAGTAGTG	000024831	Orc6	220.67	5.2999	-5.1369	0.00039111	0.99961	0.00078223	0.0056131
TACAGCTGAACTGTACAGCT	000024833	Orc6	62.556	1.8573	-4.4753	0.0039528	0.99605	0.0079055	0.03302
AGCCAACTTACTCTATCCAA	000024830	Orc6	175.38	18.55	-3.1735	0.004102	0.9959	0.0082039	0.033967
TACAGCTGAACTGTACAGCT	000024833	Orc6	23.127	3.9749	-2.2779	0.04752	0.95248	0.095039	0.21081
GAGCACCTTGAAGGCCAGGG	000013865	Psmb5	216.82	1.325	-6.5498	9.6324e-05	0.9999	0.00019265	0.0018072
GAGCACCTTGAAGGCCAGGG	000013865	Psmb5	99.175	1.8573	-5.1317	0.0014313	0.99857	0.0028625	0.015301
CGGGACGCCCCAGCTCGGCG	000013863	Psmb5	117.56	5.2999	-4.2342	0.0028778	0.99712	0.0057556	0.025968
CGGGACGCCCCAGCTCGGCG	000013863	Psmb5	183.85	27.859	-2.6793	0.006436	0.99356	0.012872	0.047722
TCTGGGGAAGTCATGACCGT	000058855	Sdad1	32.763	0	-5.0774	0.0059515	0.99405	0.011903	0.045032
AGTGACTCAGAATCCGAGGT	000058852	Sdad1	174.42	9.2748	-4.0936	0.001702	0.9983	0.003404	0.017444
GGTGCGGCCTTCCTACCATG	000058854	Sdad1	135.87	10.6	-3.5606	0.0043576	0.99564	0.0087152	0.035532
AGTGACTCAGAATCCGAGGT	000058852	Sdad1	33.567	2.7859	-3.1907	0.018337	0.98166	0.036674	0.10494
GCCCCCCGGAGTCCAAGCCG	000024379	Mrpl12	219.71	21.2	-3.3135	0.0022101	0.99779	0.0044201	0.021287
GCCCCCCGGAGTCCAAGCCG	000024379	Mrpl12	279.22	89.148	-1.6362	0.013657	0.98634	0.027314	0.083984
TGCCCAGCGTCTGTGCAGCG	000024381	Mrpl12	361.36	129.85	-1.4695	0.011935	0.98806	0.02387	0.075865
TCTTTGGGAGCATTATCCAG	000024380	Mrpl12	489.52	204.05	-1.2584	0.011357	0.98864	0.022714	0.073067
CTTGACCCAGTACATGAGGT	000004798	Eif2b4	181.57	0.92863	-6.5647	0.00012455	0.99988	0.00024909	0.0022305
CGCCATCAAGTTCCTAACCA	000004797	Eif2b4	208.27	4.6431	-5.2127	0.00041812	0.99958	0.00083624	0.0059083
CGCCATCAAGTTCCTAACCA	000004797	Eif2b4	268.85	6.6249	-5.1453	0.00022992	0.99977	0.00045984	0.0036737
GACCATACCATCCATATACC	000004799	Eif2b4	534.81	55.649	-3.2416	0.00012694	0.99987	0.00025388	0.0022638
ACGGAGACTTCCTTCCCACC	000013894	Psmd4	319.92	7.9498	-5.1642	0.00013159	0.99987	0.00026319	0.0023333
AGCAACCCTGAGAATAACGT	000013895	Psmd4	100.7	5.5718	-3.9519	0.0045454	0.99545	0.0090908	0.036689
TGTGAACACACTGAATGGCA	000013897	Psmd4	119.49	10.6	-3.3767	0.0062669	0.99373	0.012534	0.04681
CTCTTCCATAGAGACTCGAA	000013896	Psmd4	113.71	447.84	1.9682	1	2.2795e-12	4.5589e-12	1.8927e-10
AGGGCCGGCTCGATGAGGCA	000074625	Nup85	81.908	11.925	-2.6814	0.018838	0.98116	0.037677	0.10704
GGTACCATTTCTTAGTGACG	000074627	Nup85	65.527	11.925	-2.3638	0.030762	0.96924	0.061525	0.15375
AGGGCCGGCTCGATGAGGCA	000074625	Nup85	112.14	23.216	-2.2241	0.022216	0.97778	0.044432	0.12091
CCGACTGCACGTGTGCGAGG	000074626	Nup85	485.67	128.52	-1.9097	0.002049	0.99795	0.0040981	0.020084
ACAGCCTGAAGCATCTCATG	000021294	Usp39	193.69	14.575	-3.6439	0.0020969	0.9979	0.0041938	0.020444
TAAGCAAGCCAAATTGTCCC	000021297	Usp39	57.818	11.925	-2.1861	0.039717	0.96028	0.079434	0.18535
TAAGCAAGCCAAATTGTCCC	000021297	Usp39	249.46	63.147	-1.9652	0.0094652	0.99053	0.01893	0.063793
AGAACATCAAGCGTCCTCCG	000021295	Usp39	96.363	25.174	-1.8952	0.037649	0.96235	0.075299	0.17835
TACTGGTACCTTACGAACGA	000029952	Rps10	70.948	0	-6.1689	0.0014889	0.99851	0.0029779	0.015763
GGGACGGCTGCGACGCAGGG	000029950	Rps10	52.999	7.9498	-2.593	0.027954	0.97205	0.055907	0.14332
GGGACGGCTGCGACGCAGGG	000029950	Rps10	156.39	26.93	-2.4945	0.010499	0.9895	0.020998	0.068979
TGTCCACATGCCTAAGCACC	000029953	Rps10	106.96	255.72	1.2497	0.99932	0.00067978	0.0013596	0.0086335
TCTTCCACCAACTCATGGCA	000002808	Chek1	161.89	3.9749	-5.0331	0.00082564	0.99917	0.0016513	0.010029
TACAACAAACCACTTAACAG	000002807	Chek1	42.721	0.92863	-4.5027	0.003871	0.99613	0.007742	0.032499
TACAACAAACCACTTAACAG	000002807	Chek1	24.091	2.6499	-2.7812	0.028483	0.97152	0.056966	0.1453
TCTTCCACCAACTCATGGCA	000002808	Chek1	113.67	26.93	-2.0376	0.027166	0.97283	0.054332	0.14032
TCTCTAATTGAACGTTATGG	000014585	Rfc1	71.308	0	-6.1761	0.0014732	0.99853	0.0029465	0.015642
AAATAGTCGAGCACTGACGT	000014582	Rfc1	125.27	10.6	-3.4444	0.0054976	0.9945	0.010995	0.042424
GTGCCAACAAATTACTACGT	000014584	Rfc1	193.77	45.503	-2.0664	0.012799	0.9872	0.025598	0.07998
AAGAGGATCATCAATGACTC	000014583	Rfc1	1016.6	272.94	-1.8933	0.00011954	0.99988	0.00023908	0.0021564
CTGGAGTGGCTACTAACAAG	000004126	Ddx3x	155.14	1.325	-6.0695	0.00029615	0.9997	0.0005923	0.0044946
CTGGAGTGGCTACTAACAAG	000004126	Ddx3x	41.196	0.92863	-4.4515	0.0041162	0.99588	0.0082324	0.034055
CTTACACTTTCAATGTGTGG	000004127	Ddx3x	359.32	172.72	-1.0525	0.034007	0.96599	0.068014	0.16551
AGATTGGATACTGTTTACGA	000004125	Ddx3x	214.37	112.36	-0.92586	0.07976	0.92024	0.15952	0.30469
CACCGGCCTTACGTGTATCG	000032019	Atp2b1	157.15	6.5004	-4.3982	0.0015677	0.99843	0.0031354	0.016396
CACCGGCCTTACGTGTATCG	000032019	Atp2b1	150.33	6.6249	-4.3108	0.0018373	0.99816	0.0036747	0.018498
TGTTAGAAATGAAATACCAG	000032021	Atp2b1	162.85	10.6	-3.8202	0.0025045	0.9975	0.005009	0.023408
AGGAAAAATCCGTGTTACAG	000032018	Atp2b1	446.29	214.51	-1.0534	0.024702	0.9753	0.049404	0.13079
GCTGTCGAGGATGTTGTGTG	000035476	Kif18b	185.98	11.925	-3.8547	0.0018667	0.99813	0.0037335	0.018721
ATGTGGCGTTGGCATCCGTG	000035474	Kif18b	132.98	23.85	-2.4307	0.014286	0.98571	0.028573	0.086904
CCACGTTGAGCATTCCACAA	000035475	Kif18b	336.31	91.423	-1.8677	0.0059604	0.99404	0.011921	0.045085
ATGTGGCGTTGGCATCCGTG	000035474	Kif18b	321.94	135.58	-1.2415	0.024913	0.97509	0.049827	0.1316
TCTTCACAGTAAAGTACCTG	000000835	Ap3d1	910.12	142.08	-2.6708	2.1936e-05	0.99998	4.3872e-05	0.00051077
AGCACATCACCAACTTCGAG	000000833	Ap3d1	637.92	180.2	-1.8181	0.0010649	0.99894	0.0021298	0.0122
TGTCCTCATCGCTCTCCGTG	000000836	Ap3d1	1269.4	391.88	-1.6932	8.96e-05	0.99991	0.0001792	0.0017006
TGTCCTCATCGCTCTCCGTG	000000836	Ap3d1	1041.7	364.37	-1.5129	0.00049661	0.9995	0.00099322	0.0067655
CTTGACGCTAGAGATCCGAT	000058478	Gnl2	77.051	4.6431	-3.7899	0.006915	0.99309	0.01383	0.050345
GTCGGTAGCTCTGCATTGGG	000058479	Gnl2	233.2	17.225	-3.6838	0.0013128	0.99869	0.0026255	0.014335
ACTGCAGTATCAGTCAACTG	000058477	Gnl2	315.11	25.174	-3.5942	0.00061787	0.99938	0.0012357	0.0080244
AAAGCTCCTCAAGACCACAT	000058476	Gnl2	389.31	47.699	-3.0026	0.00062024	0.99938	0.0012405	0.0080463
ACACCCGTAGACAAGTGCAA	000020490	Casp8ap2	459.26	84.505	-2.4284	0.00084909	0.99915	0.0016982	0.010246
TTGGACACCAAAAGACACGA	000020493	Casp8ap2	498.16	126.29	-1.9714	0.0016421	0.99836	0.0032841	0.016977
TGAGATTCCACTCGAGTGTG	000020492	Casp8ap2	379.67	129.85	-1.5407	0.0091376	0.99086	0.018275	0.062152
ATGTGCATAAGGACAACGGG	000020491	Casp8ap2	401.83	144.42	-1.4699	0.0096113	0.99039	0.019223	0.064536
CCTGTGCATATATTCCTGGT	000074971	Gm13275	224.52	10.6	-4.2811	0.00081635	0.99918	0.0016327	0.0099402
CCCACCAGGAATATATGCAC	000074970	Gm13275	351.69	90.077	-1.9532	0.0045418	0.99546	0.0090837	0.036672
TGCATATATTCCTGGTGGGA	000074973	Gm13275	273.88	76.147	-1.8331	0.0098569	0.99014	0.019714	0.065782
GCATATATTCCTGGTGGGAG	000074972	Gm13275	390.27	112.62	-1.7839	0.0049564	0.99504	0.0099128	0.039194
AGGCTCAGGGAATAACTCGG	000059396	Cnot3	415.32	29.149	-3.7875	0.00018938	0.99981	0.00037875	0.0031372
TGGTCTCCAGCATACGAACA	000059399	Cnot3	292.18	41.788	-2.7765	0.0020167	0.99798	0.0040334	0.019845
TGACACCTTAAATATGCAGG	000059398	Cnot3	371.96	117.92	-1.649	0.0074617	0.99254	0.014923	0.053315
TGGTCTCCAGCATACGAACA	000059399	Cnot3	245.72	99.373	-1.2975	0.032432	0.96757	0.064864	0.15978
TACTTGGAGGGATTAGTGCG	000001286	Atp6v0d1	103.11	9.2748	-3.3409	0.007832	0.99217	0.015664	0.055271
CAAGTTCAGCTATTGAACGC	000001285	Atp6v0d1	515.71	130.94	-1.9695	0.0014756	0.99852	0.0029513	0.015661
TCGATGACTGACACCGTCAG	000001287	Atp6v0d1	691.93	286.02	-1.2716	0.00493	0.99507	0.00986	0.039038
TGGTGATGATGAAAGCGCGG	000001288	Atp6v0d1	136.56	274.87	1.004	0.99446	0.0055442	0.011088	0.042693
GTACTCATTGTTGGACCACG	000020276	Orc4	846.8	22.287	-5.1861	9.9716e-07	1	1.9943e-06	3.2456e-05
GTACTCATTGTTGGACCACG	000020276	Orc4	481.81	41.074	-3.5205	0.00013979	0.99986	0.00027958	0.0024531
TTGCCCAGTGATCTTCATAC	000020277	Orc4	867.4	424.38	-1.0296	0.0075848	0.99242	0.01517	0.053977
ACTCCAAAGAGGTTGCTATG	000020274	Orc4	865.34	512.76	-0.75382	0.026462	0.97354	0.052923	0.13763
GACGCGTCCACCAACGACAC	000063179	Sprtn	168.63	3.9749	-5.0916	0.00072501	0.99927	0.00145	0.0090692
ACCAAGAAAGGACCTTGTAG	000063176	Sprtn	138.76	7.9498	-3.965	0.0028878	0.99711	0.0057755	0.026036
GACGCGTCCACCAACGACAC	000063179	Sprtn	80.866	5.5718	-3.6389	0.0076428	0.99236	0.015286	0.054288
ACCAGTAGTCATGAACAGAG	000063177	Sprtn	53.963	234.52	2.0993	1	6.3832e-10	1.2766e-09	3.7394e-08
GGGCAACTACTCGGAGCGCG	000069258	Hist1h2ap	132.02	13.25	-3.2226	0.0063055	0.99369	0.012611	0.047041
GGTCTACCTGGCGGCCGTGC	000069259	Hist1h2ap	337.19	36.216	-3.1838	0.00079393	0.99921	0.0015879	0.0097225
GGTCTACCTGGCGGCCGTGC	000069259	Hist1h2ap	120.45	19.875	-2.5406	0.014397	0.9856	0.028794	0.0874
GGAGGAGCGGGTCTTGGCCT	000069257	Hist1h2ap	282.34	49.024	-2.5019	0.0031986	0.9968	0.0063973	0.028128
TATGTCTTGGAAGAAGACTG	000044935	Zfp202	596.48	42.399	-3.7832	3.715e-05	0.99996	7.43e-05	0.00080794
TAGACCTTCCCACAGAACAA	000044934	Zfp202	407.38	39.931	-3.3186	0.0003509	0.99965	0.00070181	0.0051459
TAGACCTTCCCACAGAACAA	000044934	Zfp202	627.32	90.098	-2.786	0.00012488	0.99988	0.00024975	0.0022346
[truncated: 1,773 more rows]

## Sheet: Ranked gRNA positive hits
sequence	sgRNA	Gene	control_mean	treat_mean	LFC	p.low	p.high	p.twosided	FDR.twosided
GTGGCTTAGAAACATAGATG	000014253	Rab10	116610	776.68	-7.2283	5.0426e-141	1	1.0085e-140	1.3771e-138
ATCACAACCTCCTACTACAG	000014251	Rab10	1232.3	109.09	-3.4857	4.6443e-07	1	9.2886e-07	8.7489e-06
ATCACAACCTCCTACTACAG	000014251	Rab10	910.26	90.581	-3.3147	6.0481e-06	0.99999	1.2096e-05	0.00010117
CTAGTGTATGACATCACCAA	000014252	Rab10	1309.1	166.71	-2.9656	8.5616e-07	1	1.7123e-06	1.5712e-05
TTAGTGAGAACCCACACGTG	000029041	Lrrk2	1421.7	82.872	-4.0843	4.7172e-08	1	9.4344e-08	9.6467e-07
ATTGGCTGAATATCTGTGCA	000029039	Lrrk2	3839.8	298.72	-3.6797	1.3576e-13	1	2.7152e-13	3.6604e-12
GCATCTAGGTTGGTGATACG	000029040	Lrrk2	1874	184.62	-3.3365	1.1394e-08	1	2.2789e-08	2.4302e-07
ATTGGCTGAATATCTGTGCA	000029039	Lrrk2	2598.3	321.94	-3.0088	6.3075e-10	1	1.2615e-09	1.4496e-08
GCTGGTACTCACGAATCGAG	000011215	Myh9	622.74	68.417	-3.1676	6.8704e-05	0.99993	0.00013741	0.00098012
TGGACTATAAAGCTGACGAG	000011217	Myh9	587.82	92.309	-2.6577	0.00021213	0.99979	0.00042425	0.0027194
TGGACTATAAAGCTGACGAG	000011217	Myh9	700.91	128.16	-2.4421	0.00014801	0.99985	0.00029602	0.0019682
GCTGGTACTCACGAATCGAG	000011215	Myh9	511.67	118.25	-2.1041	0.0011155	0.99888	0.0022311	0.011573
CCAGCTTATTTCCAACCAGG	000014259	Rab12	1564.8	93.472	-4.0509	1.892e-08	1	3.784e-08	3.9696e-07
ATATACGAGTATGATCCCCT	000014258	Rab12	2082.9	396.05	-2.3919	9.8177e-08	1	1.9635e-07	1.9541e-06
CGTTCGATGACTTGCCAAAG	000014260	Rab12	496.87	104.07	-2.2444	0.00091733	0.99908	0.0018347	0.009776
ATATACGAGTATGATCCCCT	000014258	Rab12	2081	555.38	-1.9039	1.2488e-06	1	2.4975e-06	2.2548e-05
GTTGTGTTTGAAGATTCGAA	000016644	Sptlc2	679.75	79.34	-3.0829	5.0208e-05	0.99995	0.00010042	0.00073384
GTTGTGTTTGAAGATTCGAA	000016644	Sptlc2	1219	235.12	-2.3692	7.9817e-06	0.99999	1.5963e-05	0.00013154
ACAACTATCTTGGATTTGCG	000016643	Sptlc2	728.74	181.16	-2.0022	0.0003796	0.99962	0.00075921	0.0045658
TGAGAGCAATCACTTCAGGA	000016645	Sptlc2	1140.8	315.11	-1.8528	7.7944e-05	0.99992	0.00015589	0.0011015
TAGCAGCTTTGTAAGCCACG	000019029	Ywhae	47.36	1.5258	-4.259	0.0054206	0.99458	0.010841	0.042019
TAGCAGCTTTGTAAGCCACG	000019029	Ywhae	2.6499	44.327	3.6344	1	9.5511e-23	1.9102e-22	3.3202e-21
CTCATTCCAGCAGCTAACAC	000019027	Ywhae	604.54	77.814	-2.9417	0.00011362	0.99989	0.00022723	0.0015532
CAAACTCAGCCAGATACCTG	000019026	Ywhae	1282.6	186.94	-2.7718	1.6645e-06	1	3.3289e-06	2.9655e-05
AGACGCCATTGAACAGCACA	000032118	Col4a3bp	1.325	20.236	3.1912	1	4.1555e-12	8.3111e-12	1.0584e-10
AGACGCCATTGAACAGCACA	000032118	Col4a3bp	0.92863	15.258	3.0755	1	4.9745e-11	9.9491e-11	1.2064e-09
TAATCCGGCCCTCCGAAACG	000032121	Col4a3bp	709.47	86.206	-3.0263	4.4032e-05	0.99996	8.8064e-05	0.00064956
CCAGTTTCTCACGTAAACTG	000032119	Col4a3bp	906.28	181.16	-2.3163	5.5576e-05	0.99994	0.00011115	0.00080629
CAGAGGAGTCCTTAAGCACG	000002841	Chm	1487.9	199.47	-2.8928	3.5401e-07	1	7.0803e-07	6.7352e-06
CAGAGTTTAAAAACATTACG	000002842	Chm	474.53	99.938	-2.2361	0.0010926	0.99891	0.0021853	0.011374
TTGTGACTGAAAATTCAATG	000002844	Chm	1191.2	267.89	-2.1485	1.9737e-05	0.99998	3.9474e-05	0.00030836
TTGTGACTGAAAATTCAATG	000002844	Chm	1045.6	332.62	-1.6495	0.00027264	0.99973	0.00054528	0.0034042
ACAGGCATTTGAGAGACTCG	000047116	Ric8	660.25	101.46	-2.6901	0.00011716	0.99988	0.00023432	0.0015975
ACAGGCATTTGAGAGACTCG	000047116	Ric8	822.81	180.2	-2.1847	0.0001315	0.99987	0.000263	0.0017724
TCTGCGGTCGTTCAACCGGG	000047119	Ric8	201.4	57.818	-1.7829	0.018308	0.98169	0.036617	0.10647
GATGCGCTGGAACTAACACT	000047117	Ric8	608.25	179.28	-1.7568	0.0014893	0.99851	0.0029786	0.014742
TTAAGGGTCTCAAACCAGCG	000071235	Dock1	255.72	52.999	-2.2492	0.0058007	0.9942	0.011601	0.04437
TTAAGGGTCTCAAACCAGCG	000071235	Dock1	467.1	108.33	-2.0981	0.0015258	0.99847	0.0030516	0.015036
ACAGGACGGTCATTTCCATG	000071232	Dock1	881.11	265	-1.7295	0.00041432	0.99959	0.00082864	0.004929
AGTGTGAATTCCACTCCACC	000071233	Dock1	374.24	131.22	-1.5049	0.010241	0.98976	0.020481	0.068922
GCCCGGTGGTAAGATCGGGT	000018719	Vhl	0.92863	44.327	4.5547	1	3.6529e-87	7.3058e-87	4.3613e-85
TTAACCTGGCAATGTGATGT	000018721	Vhl	791.01	56.854	-3.775	7.5105e-06	0.99999	1.5021e-05	0.00012423
GCCCGGTGGTAAGATCGGGT	000018719	Vhl	175.51	30.515	-2.4856	0.0087857	0.99121	0.017571	0.06127
TTAACCTGGCAATGTGATGT	000018721	Vhl	455.03	125.88	-1.8457	0.0028767	0.99712	0.0057534	0.025293
AGTAGTAGCTGATCTTGAAG	000005285	F2r	446.52	5.7818	-6.0441	1.6812e-05	0.99998	3.3624e-05	0.0002654
GGTTCTCACTGAGGACGTCG	000005287	F2r	903.63	203.33	-2.1465	9.2458e-05	0.99991	0.00018492	0.0012884
AGTAGTAGCTGATCTTGAAG	000005285	F2r	237.73	88.494	-1.4155	0.026963	0.97304	0.053926	0.14178
GTTCCCGTAAAACGCTGCGG	000005288	F2r	561.82	220.47	-1.3455	0.0064152	0.99358	0.01283	0.048051
GCTGGGGACAGTCACCAACG	000043926	Ascc3	411.38	112.14	-1.8658	0.0036268	0.99637	0.0072537	0.030494
GCAAAAATGTAGCAACATCG	000043925	Ascc3	546.96	177.75	-1.6161	0.0030661	0.99693	0.0061322	0.026634
TAGAGTTATTGAACTAACTG	000043927	Ascc3	527.34	195.62	-1.4261	0.0058439	0.99416	0.011688	0.04463
CTTCAAACCTACATCAGCCG	000043924	Ascc3	528.39	207.5	-1.3442	0.0074345	0.99257	0.014869	0.053887
ACATACCAGAAACTCCTGGT	000025483	Rbms1	360.31	93.835	-1.9297	0.0044758	0.99552	0.0089517	0.036073
TGGCACCACTGGAATCACGT	000025485	Rbms1	1228.3	336.31	-1.8657	4.9804e-05	0.99995	9.9609e-05	0.00072835
CAATACCACTGATCAAGACC	000025484	Rbms1	812.55	225.81	-1.8427	0.00039262	0.99961	0.00078525	0.0047021
ACATACCAGAAACTCCTGGT	000025483	Rbms1	552.51	188.87	-1.5436	0.0036697	0.99633	0.0073395	0.030776
GCACCCGAGAGCCACAACGC	000046511	Rabif	1076.3	142.66	-2.9067	4.3054e-06	1	8.6107e-06	7.3255e-05
ATGTTCACCTTTGAGAATGT	000046509	Rabif	1417.7	322.81	-2.1314	6.8747e-06	0.99999	1.3749e-05	0.00011423
GAACGAGCTCGTGTCAGCCG	000046510	Rabif	359.07	93.472	-1.9303	0.0045093	0.99549	0.0090187	0.036279
AAGAAGCCAGATCTGGCCGA	000046508	Rabif	817.51	280.42	-1.5403	0.0011031	0.9989	0.0022063	0.011467
GGTGAACCGCACACACCTAG	000057917	4932438A13Rik	325.02	15.258	-4.3258	0.00026843	0.99973	0.00053685	0.0033565
TGTGGGAAATCGTGGAAGTG	000057919	4932438A13Rik	1937.1	237.05	-3.0253	1.887e-08	1	3.7739e-08	3.9599e-07
TCTTCACAATCAGTCAGTCG	000057918	4932438A13Rik	475.67	147.43	-1.6831	0.0037679	0.99623	0.0075358	0.031445
GGTGAACCGCACACACCTAG	000057917	4932438A13Rik	55.649	108.89	0.95594	0.95911	0.04089	0.081781	0.19152
AGTAGAGGCCAGCGTAGCGT	000059464	Ap2s1	390.95	83.154	-2.2196	0.0020758	0.99792	0.0041517	0.019377
CAACAATCTGGCCTATCTCG	000059465	Ap2s1	455.03	132.74	-1.7697	0.0034367	0.99656	0.0068734	0.029194
CAAGCACACCAACTTTGTGG	000059466	Ap2s1	700.91	213.93	-1.7075	0.0010667	0.99893	0.0021335	0.011141
AGTAGAGGCCAGCGTAGCGT	000059464	Ap2s1	435.92	142.62	-1.6051	0.0057198	0.99428	0.01144	0.043886
CCTGACAGTAACCAACCTCA	000005214	Evi5	924.83	262.11	-1.8151	0.00024739	0.99975	0.00049478	0.0031183
GGAGATGCAGGATAAAGTGT	000005215	Evi5	291.49	95.399	-1.6013	0.013514	0.98649	0.027028	0.08493
CCTGACAGTAACCAACCTCA	000005214	Evi5	707.61	248.7	-1.5048	0.0020177	0.99798	0.0040353	0.018927
ACTATTGCTCTGAAGTGATG	000005213	Evi5	722.47	293.71	-1.2956	0.0040272	0.99597	0.0080544	0.033168
GCAGTTTGCCCTGACCAACG	000000955	Nr2f2	446.67	47.299	-3.2124	0.00028231	0.99972	0.00056462	0.0035114
GGCGCTGAAGAGCATCCGTG	000000956	Nr2f2	818.12	129.69	-2.6479	4.2513e-05	0.99996	8.5027e-05	0.00062862
CTACGGCCAGTTCACGTGCG	000000953	Nr2f2	504.24	120.54	-2.0556	0.0013045	0.9987	0.0026091	0.013198
CTACGGCCAGTTCACGTGCG	000000953	Nr2f2	567.09	288.12	-0.97443	0.021655	0.97834	0.04331	0.12058
CGCCAGTTGAAAACGAACCT	000035102	Ppp1r35	443.88	10.68	-5.2513	3.4812e-05	0.99997	6.9624e-05	0.00052315
CGCCAGTTGAAAACGAACCT	000035102	Ppp1r35	523.36	148.4	-1.8114	0.0020714	0.99793	0.0041428	0.019344
GGGCGACGATCATGAGCTGG	000035104	Ppp1r35	275.59	78.054	-1.8069	0.010202	0.9898	0.020403	0.068718
CGGTAGAGTCGCTTAGAGCG	000035103	Ppp1r35	977.83	327.63	-1.5746	0.00049273	0.99951	0.00098546	0.0057314
TTGGGCATCCTGCAGCACGT	000052827	Nudcd3	698.26	26.982	-4.6433	5.9734e-06	0.99999	1.1947e-05	0.00010002
TTGGGCATCCTGCAGCACGT	000052827	Nudcd3	356.59	33.567	-3.3709	0.00052914	0.99947	0.0010583	0.0060999
GCAAGACTACACCGACCTGG	000052825	Nudcd3	319.45	40.433	-2.9512	0.001251	0.99875	0.002502	0.012743
CTCTCCATTCTCTTCCACCA	000052824	Nudcd3	739.34	491.45	-0.5882	0.065676	0.93432	0.13135	0.26856
CTTACGTTGAAAAGCTTGTG	000003445	Crkl	305.52	41.959	-2.835	0.0016527	0.99835	0.0033054	0.016053
GGTCCCCGATCTTAAAGCGG	000003448	Crkl	497.74	82.391	-2.5803	0.00048252	0.99952	0.00096505	0.0056305
CTTACGTTGAAAAGCTTGTG	000003445	Crkl	177.55	83.836	-1.0736	0.070617	0.92938	0.14123	0.28263
GACACGCGAGTTCTCGGACA	000003446	Crkl	201.4	97.326	-1.0415	0.067003	0.933	0.13401	0.2724
TCCCCATCATACCTCCAGAA	000028217	Srp19	201.51	8.3917	-4.4305	0.00091966	0.99908	0.0018393	0.0097969
ATAAGAAGACCATAGCTGAG	000028215	Srp19	0.92863	14.454	3.0024	1	5.3645e-10	1.0729e-09	1.2378e-08
ATAAGAAGACCATAGCTGAG	000028215	Srp19	1.8573	0	-1.5146	0.11493	0.88507	0.22987	0.39498
TCAGTTTCGAGGCAGAGTCC	000028216	Srp19	21.358	52.639	1.2625	0.96973	0.030266	0.060532	0.15416
TCATTGGCACCACTGAACAG	000004559	Dyrk1a	1689.3	483.74	-1.802	9.9198e-06	0.99999	1.984e-05	0.00016145
TCAGCAACCTCTAACTAACC	000004558	Dyrk1a	804.19	236.49	-1.7614	0.00053603	0.99946	0.0010721	0.0061655
TAATAGGAGTACAAACCACC	000004557	Dyrk1a	544.17	163.26	-1.7308	0.0022709	0.99773	0.0045417	0.020847
TCTTGATTGCACTCCGTTTG	000004560	Dyrk1a	1138.5	438.66	-1.3739	0.00066563	0.99933	0.0013313	0.0074308
TGGATGTGTTCACACCCGCA	000020236	Mapk14	981.81	192.73	-2.3429	3.3036e-05	0.99997	6.6072e-05	0.00049856
TACAAAGACGGGGCATCGTG	000020235	Mapk14	428.1	100.7	-2.077	0.0020853	0.99791	0.0041707	0.019451
CAGGCTACGTGGCTACCAGG	000020234	Mapk14	403.02	109.86	-1.8658	0.0038295	0.99617	0.0076589	0.031858
TTCGGCTGACATAATTCACA	000020237	Mapk14	514.09	232.23	-1.143	0.014712	0.98529	0.029424	0.090507
TGACCGTGAACATGACTGCA	000009756	Ldlr	979.16	244.76	-1.9958	0.00010015	0.9999	0.00020029	0.0013844
GCAGACTGGTGTACTCGCTG	000009754	Ldlr	748.61	203.33	-1.8753	0.00049451	0.99951	0.00098903	0.0057486
TGACCGTGAACATGACTGCA	000009756	Ldlr	1222.1	350.16	-1.8003	6.7626e-05	0.99993	0.00013525	0.00096615
GGTGTCGTAGGACAAGTTAG	000009755	Ldlr	547.89	206.74	-1.4017	0.0057264	0.99427	0.011453	0.043926
AAGACCACTCAAATCGAACA	000018014	Hsp90b1	433.67	106.04	-2.0218	0.0022476	0.99775	0.0044952	0.02067
AGAGGAAACACACTAGGTCG	000018015	Hsp90b1	400.14	126.24	-1.6566	0.0062042	0.9938	0.012408	0.04681
AAGACCACTCAAATCGAACA	000018014	Hsp90b1	531.31	168.63	-1.6498	0.0030313	0.99697	0.0060626	0.026392
TCCACAGACAGAGACTGTTG	000018017	Hsp90b1	736.69	307.4	-1.2582	0.0044055	0.99559	0.008811	0.035598
ATCCAGTGGATTCCATGCAA	000063837	Mios	671.76	188.87	-1.8251	0.00086813	0.99913	0.0017363	0.0093309
AGAAGGAAGCAACACGATCG	000063836	Mios	372.38	126.64	-1.5486	0.0093458	0.99065	0.018692	0.064293
CATACCTTGATAAAGCCCGA	000063838	Mios	449.45	187.67	-1.2555	0.013555	0.98645	0.027109	0.085114
AGAAGGAAGCAACACGATCG	000063836	Mios	29.149	70.345	1.2427	0.97918	0.020821	0.041642	0.11714
CCTGCATGGAGCATACTCAA	000008810	Itgav	793.66	116.6	-2.7565	3.9815e-05	0.99996	7.9629e-05	0.00059199
ATAATAACCAATTAGCAACA	000008809	Itgav	471.69	121.42	-1.9491	0.0020462	0.99795	0.0040923	0.019143
CCTGCATGGAGCATACTCAA	000008810	Itgav	114.22	31.278	-1.8358	0.034526	0.96547	0.069052	0.16956
TCATGGACCGAGGTTCCGAT	000008812	Itgav	79.862	260.91	1.6955	1	1.1986e-06	2.3971e-06	2.1698e-05
GTAGACCAGGACGTAGCCAT	000037695	Nkiras2	478.32	28.909	-4.0023	8.3195e-05	0.99992	0.00016639	0.0011696
CTTGTTGCCAAGGACCACGA	000037694	Nkiras2	924.83	251.51	-1.8744	0.00020051	0.9998	0.00040102	0.0025874
TGAGATGATCGAGACCCAGG	000037697	Nkiras2	508.79	191.76	-1.4031	0.0068105	0.99319	0.013621	0.050314
TGAGATGATCGAGACCCAGG	000037697	Nkiras2	534.89	266.25	-1.0038	0.021584	0.97842	0.043168	0.12029
GATGTGATAAGTGTGGGCGT	000037724	Ppp2r2a	666.46	64.563	-3.3477	3.6964e-05	0.99996	7.3929e-05	0.0005528
AAAAGAGGAACACTTACCGT	000037722	Ppp2r2a	315.34	102.14	-1.6168	0.011286	0.98871	0.022571	0.074186
AAAAGAGGAACACTTACCGT	000037722	Ppp2r2a	276.73	93.072	-1.5619	0.016023	0.98398	0.032046	0.096467
CAAACGTGTTACAGCTGTTG	000037723	Ppp2r2a	1079.9	492.41	-1.1313	0.0026448	0.99736	0.0052896	0.02362
ATGAATAGTTGAAACCCCTG	000068120	Ltbp1	394.67	84.68	-2.2073	0.0020648	0.99794	0.0041297	0.019291
ATGAATAGTTGAAACCCCTG	000068120	Ltbp1	597.56	202.36	-1.5575	0.0028262	0.99717	0.0056524	0.024931
GGGTACCGGATGTCACGGAG	000068123	Ltbp1	423.45	152.58	-1.4666	0.0086638	0.99134	0.017328	0.060612
GGGTACCGGATGTCACGGAG	000068123	Ltbp1	657.19	244.76	-1.4212	0.0033387	0.99666	0.0066775	0.028534
TCCCTACTATAACCACCCGG	000061203	Elmsan1	222.6	15.418	-3.7675	0.0013552	0.99864	0.0027104	0.013618
GGAGAAGCGGAAAAGCGTGT	000061201	Elmsan1	285.09	69.422	-2.0224	0.0065426	0.99346	0.013085	0.048783
CTGACGGCTTGTGCTCGGTG	000061200	Elmsan1	974.13	268.53	-1.8551	0.00016879	0.99983	0.00033759	0.0022178
GGAGAAGCGGAAAAGCGTGT	000061201	Elmsan1	433.27	210.07	-1.0409	0.026831	0.97317	0.053663	0.14127
TCTGTCTGTGGATAACTTAG	000002560	Cdc42	392.19	75.163	-2.3681	0.0015826	0.99842	0.0031653	0.015496
CAGTTGGTACATATTCCGAT	000002559	Cdc42	995.49	301.34	-1.7207	0.00025409	0.99975	0.00050819	0.0031933
TCTGTCTGTGGATAACTTAG	000002560	Cdc42	194.08	61.031	-1.653	0.023732	0.97627	0.047465	0.1291
CAGTTGGTACATATTCCGAT	000002559	Cdc42	1208.4	387.38	-1.6387	0.00014704	0.99985	0.00029408	0.0019577
CGTGGTCTCGTTATTCACGT	000061825	Loxhd1	270.23	49.587	-2.4227	0.0039801	0.99602	0.0079602	0.032864
GGTTCTATAAGATTCGGGCG	000061826	Loxhd1	1302.4	245.72	-2.4014	4.5569e-06	1	9.1138e-06	7.7369e-05
TGGCAAGCCATCGATCACAG	000061827	Loxhd1	658.51	229.34	-1.5176	0.0024077	0.99759	0.0048154	0.021885
GGTTCTATAAGATTCGGGCG	000061826	Loxhd1	244.23	92.309	-1.394	0.027042	0.97296	0.054085	0.14208
TGCAGCTTGACATAGAGCTT	000020993	Rps26	124.55	14.454	-3.0221	0.0083616	0.99164	0.016723	0.058956
CCTTATCCTTGGGCACGCAC	000020990	Rps26	162.51	27.464	-2.5222	0.0095646	0.99044	0.019129	0.065431
TCTGAAGCAAGCGTCTTCGA	000020992	Rps26	243.8	74.199	-1.7028	0.015344	0.98466	0.030688	0.0934
TCTGAAGCAAGCGTCTTCGA	000020992	Rps26	91.934	38.144	-1.2474	0.087226	0.91277	0.17445	0.32713
GTATAAATAATGTCAAACGC	000012969	Pik3c2a	306.45	69.422	-2.1262	0.0046595	0.99534	0.0093191	0.037229
GTATAAATAATGTCAAACGC	000012969	Pik3c2a	287.52	68.417	-2.0553	0.0060765	0.99392	0.012153	0.046019
GGAAGGCCCGCATAATCCAG	000012968	Pik3c2a	845.98	296.76	-1.5082	0.001105	0.9989	0.00221	0.011483
GCCTAAGGTAGACTATGTGG	000012967	Pik3c2a	760.54	291.42	-1.3809	0.0025298	0.99747	0.0050595	0.022788
TGGCCGCTCTCCCAGCAAAG	000027777	Sec61b	347.31	65.608	-2.3866	0.0021951	0.9978	0.0043903	0.020265
AGTGGATCCCGCAGCCCGTG	000027774	Sec61b	386.31	119.01	-1.6903	0.0062413	0.99376	0.012483	0.047033
TGGCCGCTCTCCCAGCAAAG	000027777	Sec61b	249.1	105.04	-1.2379	0.035949	0.96405	0.071898	0.17464
CACTTACCTCTGCCGAACAG	000027775	Sec61b	376.09	186.14	-1.0108	0.035736	0.96426	0.071473	0.1739
CGTGGTTTAGACATTGCAAG	000023099	Map3k14	1124.9	80.945	-3.7803	6e-07	1	1.2e-06	1.1183e-05
TGGGCCAGTTGGCTTAGATG	000023101	Map3k14	365.69	124.31	-1.5491	0.0096951	0.9903	0.01939	0.066121
CCCCGAAACTGAGGACAACG	000023098	Map3k14	836.06	290.05	-1.5241	0.0010838	0.99892	0.0021677	0.011294
GCAAAGCCCGAAAAAAACGT	000023100	Map3k14	364.37	156.11	-1.2176	0.02174	0.97826	0.043479	0.12087
GGGTGGATGACTATTGCCGG	000057821	Ncoa5	463.38	69.422	-2.7212	0.00049956	0.9995	0.00099912	0.005799
GTAGAGAGGAGCTTTATCGT	000057822	Ncoa5	555.32	141.13	-1.9687	0.0011557	0.99884	0.0023114	0.011919
TAACAGATACCTCACTGCCG	000057823	Ncoa5	1118.3	397.01	-1.4917	0.00040911	0.99959	0.00081823	0.0048764
TAACAGATACCTCACTGCCG	000057823	Ncoa5	1000.1	360.84	-1.4682	0.00070717	0.99929	0.0014143	0.0078232
GATGCTTGCACATACCACCC	000029474	Chordc1	1067.9	236.09	-2.1727	3.4588e-05	0.99997	6.9177e-05	0.00052011
GATGCTTGCACATACCACCC	000029474	Chordc1	382.59	103.75	-1.8726	0.0043173	0.99568	0.0086347	0.035018
GGTATATAAGTTACCCCTCG	000029475	Chordc1	333.89	134.91	-1.3011	0.020437	0.97956	0.040874	0.11549
TAATACATTCTTAGCCCAAG	000029477	Chordc1	519.39	227.42	-1.1879	0.012517	0.98748	0.025034	0.080211
CCAGGTCCGAGATTCTCACA	000049833	Adrbk1	96754	3850.7	-4.6508	1.986e-116	1	3.972e-116	3.7672e-114
CTCTTCGTAGAACTCCACCA	000049834	Adrbk1	151.05	498.19	1.7151	1	1.1668e-09	2.3337e-09	2.6428e-08
AGATTTGTCAGAACCTCCGA	000049832	Adrbk1	708.86	240.91	-1.5531	0.0017016	0.9983	0.0034033	0.016454
GAGGCCAGGATACTCACCCA	000049835	Adrbk1	779.08	349.8	-1.153	0.0057879	0.99421	0.011576	0.044295
GCAGCATTTGGAATAGCCAA	000024232	Ptbp2	763.18	79.017	-3.2555	1.9983e-05	0.99998	3.9965e-05	0.00031197
GCAGCATTTGGAATAGCCAA	000024232	Ptbp2	166.22	41.196	-1.9866	0.018099	0.9819	0.036198	0.10562
TCGAATGTGAAGTACACGAG	000024233	Ptbp2	35.774	107.93	1.5666	0.99919	0.00080572	0.0016114	0.0087538
AGCCCCAACTCTAATATGAG	000024230	Ptbp2	1077.2	535.78	-1.0062	0.0050186	0.99498	0.010037	0.039506
CATGCCACTTCTGGTCCCGT	000028459	Rps23	0.92863	34.691	4.2099	1	1.5686e-53	3.1372e-53	1.0298e-51
GCATGAGAGGCACCCCCAAA	000028460	Rps23	173.57	8.6726	-4.1738	0.001596	0.9984	0.0031921	0.015603
AAGTCACCTCAATGAAGTTC	000028458	Rps23	561.79	54.927	-3.331	8.9382e-05	0.99991	0.00017876	0.0012487
TTGATATTGCAGAGGGGTTG	000028461	Rps23	647.91	228.38	-1.5003	0.0026737	0.99733	0.0053474	0.023828
ATAGAATTTGCAGTAGCCGA	000049480	Pkn2	3.9749	42.4	3.1249	1	2.222e-12	4.444e-12	5.7222e-11
TTTGAAGCTAGATAATACTG	000049483	Pkn2	442.95	85.443	-2.3606	0.0010861	0.99891	0.0021722	0.011315
TTTGAAGCTAGATAATACTG	000049483	Pkn2	329.92	85.763	-1.9313	0.0055224	0.99448	0.011045	0.042655
TGTGCCAGAATGATTTACTG	000049482	Pkn2	528.66	158.03	-1.7357	0.002443	0.99756	0.0048861	0.022158
CGCTCGGCATTCGAGTACGG	000053542	Aldh4a1	800.28	246.69	-1.6938	0.00068783	0.99931	0.0013757	0.0076417
CAACTGGTACTGTATATCGG	000053541	Aldh4a1	929.55	323.46	-1.52	0.00074947	0.99925	0.0014989	0.0082289
CGCTCGGCATTCGAGTACGG	000053542	Aldh4a1	818.12	316.6	-1.3669	0.0021405	0.99786	0.0042811	0.019858
CAACTGGTACTGTATATCGG	000053541	Aldh4a1	873.16	358.47	-1.282	0.0024847	0.99752	0.0049694	0.022463
AAACGTTGTACCCAAGACGG	000013527	Ppic	687.66	92.508	-2.8806	6.7055e-05	0.99993	0.00013411	0.00095871
AGGACTTCATGATTCAAGGA	000013528	Ppic	808.83	204.45	-1.9788	0.00026032	0.99974	0.00052063	0.0032642
AAACGTTGTACCCAAGACGG	000013527	Ppic	444.81	112.14	-1.9783	0.0022867	0.99771	0.0045734	0.020966
AGGACTTCATGATTCAAGGA	000013528	Ppic	1428.3	397.01	-1.8444	2.2996e-05	0.99998	4.5992e-05	0.00035569
GACTGTGGCGTAGTTCCCGG	000020667	Rpl8	1.325	32.763	3.8602	1	1.7316e-30	3.4633e-30	7.1469e-29
CAACACACGATCGTACCCTC	000020666	Rpl8	227.9	51.072	-2.1361	0.0086678	0.99133	0.017336	0.060637
TAGGACATCATTCATGACCC	000020669	Rpl8	197.42	88.654	-1.1461	0.056006	0.94399	0.11201	0.24014
CAACACACGATCGTACCCTC	000020666	Rpl8	4.6431	2.2886	-0.779	0.16286	0.83714	0.32572	0.49993
GAAAGCTTGGCTCGCCACGG	000028708	Mad2l1bp	26.93	202.93	2.8682	1	7.6431e-21	1.5286e-20	2.5385e-19
TGGATCCCACGCCTTACTTG	000028709	Mad2l1bp	481.96	83.154	-2.5208	0.00060518	0.99939	0.0012104	0.0068477
GAAAGCTTGGCTCGCCACGG	000028708	Mad2l1bp	518.06	109.85	-2.2273	0.00081973	0.99918	0.0016395	0.0088793
CCAAGAAGGATCAACACTTG	000028707	Mad2l1bp	805.58	231.27	-1.796	0.00047427	0.99953	0.00094854	0.0055451
TTTATGAAGATGGCGTCCCA	000030825	Pdcl	1089.1	285.23	-1.9292	7.3663e-05	0.99993	0.00014733	0.0010457
ACCTCCAGGAGAAAATCAGT	000030822	Pdcl	857.26	238.02	-1.8443	0.00031148	0.99969	0.00062296	0.0038314
CAAAAGGTGTGATCAATGAC	000030823	Pdcl	243.3	77.814	-1.6321	0.017448	0.98255	0.034896	0.10276
TTTATGAAGATGGCGTCCCA	000030825	Pdcl	468.03	172.41	-1.4355	0.0075338	0.99247	0.015068	0.054439
ACATACCTATTGTATCTGGG	000024666	Shoc2	1303.8	248.62	-2.386	4.7641e-06	1	9.5282e-06	8.0671e-05
CATGTTGAGGGAATAAATGG	000024668	Shoc2	741.04	184.62	-1.9992	0.00035701	0.99964	0.00071403	0.0043258
TAACATTTCTACTCTACCAG	000024669	Shoc2	589.61	161.89	-1.8583	0.0012498	0.99875	0.0024995	0.012733
ATTATGTAACCTCATTACCC	000024667	Shoc2	192.12	344.98	0.84118	0.98768	0.012322	0.024644	0.079267
GAGATCTGCACATTCCGCAC	000024770	Vps29	753.91	191.76	-1.9695	0.00036211	0.99964	0.00072422	0.0043793
GGACACCAAGTTATTCCGTG	000024772	Vps29	225.25	84.799	-1.3989	0.029968	0.97003	0.059936	0.15305
GGCGACGTCCACATCGTGAG	000024773	Vps29	756.83	307.44	-1.2969	0.0035315	0.99647	0.007063	0.029838
GAGATCTGCACATTCCGCAC	000024770	Vps29	235.87	99.175	-1.2416	0.038216	0.96178	0.076431	0.18257
GCAGGATTAAGTATGAGACC	000047818	Bap1	356.42	35.654	-3.2856	0.00058611	0.99941	0.0011722	0.0066602
CCACCAACGTAGAAACCTTG	000047817	Bap1	243.8	28.909	-3.0329	0.0023471	0.99765	0.0046942	0.021427
TCAGCTATGTGCCTATCACA	000047819	Bap1	425.31	125.11	-1.7572	0.0042331	0.99577	0.0084661	0.034481
CCACCAACGTAGAAACCTTG	000047817	Bap1	273.94	205.98	-0.40966	0.21346	0.78654	0.42692	0.59563
GAAGATGAGCGAATAGAGCG	000012007	Ntsr2	520.96	102.99	-2.3275	0.00065373	0.99935	0.0013075	0.0073175
CGAGATCGCCGAAGACCCAG	000012006	Ntsr2	956.63	223.56	-2.0924	8.1799e-05	0.99992	0.0001636	0.0011517
TGTCCCATGATAACCGCCAT	000012009	Ntsr2	720.79	352.69	-1.0291	0.011357	0.98864	0.022714	0.074544
TAGCACCGTGCACACACGCG	000012008	Ntsr2	1293.2	749.7	-0.78572	0.010946	0.98905	0.021893	0.072486
CTGCGGTAGTGATTCCACGC	000048706	Rapgef1	37.099	272.71	2.8448	1	2.5408e-24	5.0817e-24	9.1576e-23
GTATACTCGGCTATAACAGG	000048707	Rapgef1	52.932	6.8659	-2.7774	0.023434	0.97657	0.046868	0.12782
AGGACAGCTGCTCGTCTGAG	000048704	Rapgef1	690.31	112.74	-2.6035	0.00011241	0.99989	0.00022481	0.0015376
GTATACTCGGCTATAACAGG	000048707	Rapgef1	11.925	69.381	2.4451	1	1.5993e-07	3.1986e-07	3.1308e-06
CGGCACTCGTTGGTGTCCCG	000052406	Ghsr	861.23	184.05	-2.2201	9.5006e-05	0.9999	0.00019001	0.0013203
CACCACGAAGAGCGCCACGC	000052405	Ghsr	147.07	464.47	1.6524	1	1.3758e-08	2.7516e-08	2.9155e-07
GCTCGACACCCATACCATCA	000052407	Ghsr	503.49	193.69	-1.3737	0.0076033	0.9924	0.015207	0.054817
CAACCTCTACCTATCCAGCA	000052404	Ghsr	1012.3	447.12	-1.1771	0.0025609	0.99744	0.0051217	0.023012
CAGACTGGCGGGATCCAGAG	000073825	Neurl2	574.82	78.577	-2.8552	0.00016547	0.99983	0.00033094	0.0021776
CACGACTGAAGCACACACCG	000073824	Neurl2	956.63	268.85	-1.8273	0.0002032	0.9998	0.00040639	0.0026178
GCATGGAGCCAACATCCGCA	000073827	Neurl2	300.87	115.2	-1.3774	0.020379	0.97962	0.040757	0.11524
CAGACTGGCGGGATCCAGAG	000073825	Neurl2	408.09	159	-1.3544	0.012493	0.98751	0.024987	0.080096
TCAGTGAGAATCACGATGCA	000004960	Epb4.1l1	526.01	69.381	-2.9046	0.00022492	0.99978	0.00044985	0.0028653
CCACTCACCGGAAGAACGTG	000004959	Epb4.1l1	454.1	131.98	-1.775	0.0034126	0.99659	0.0068252	0.029032
TCAGTGAGAATCACGATGCA	000004960	Epb4.1l1	54.789	167.83	1.5976	0.99991	8.5606e-05	0.00017121	0.0012004
ACTGGGTGACTATGATGCCG	000004957	Epb4.1l1	1301.1	445.2	-1.5451	0.00016181	0.99984	0.00032362	0.0021336
TCTGGACGTAAACCCTATGC	000068091	Wdr24	309.23	45.773	-2.7296	0.0018372	0.99816	0.0036743	0.017527
TCTGGACGTAAACCCTATGC	000068091	Wdr24	47.699	148.4	1.6172	0.99987	0.00012564	0.00025127	0.0017005
ATCTGAAGGATATGGGCCCG	000068089	Wdr24	1527.7	533.85	-1.5151	8.5849e-05	0.99991	0.0001717	0.0012036
GTGGTGGTTACATGGAACCT	000068090	Wdr24	492.17	198.35	-1.3068	0.0097282	0.99027	0.019456	0.066284
TGGCCACCACGACAACCAGT	000052778	Trp53bp2	897.01	249.58	-1.8415	0.00025812	0.99974	0.00051624	0.0032388
TTGACCAAGACGCAACCCAG	000052779	Trp53bp2	477.31	148	-1.6827	0.0037378	0.99626	0.0074756	0.031233
TGGCCACCACGACAACCAGT	000052778	Trp53bp2	487.53	167.83	-1.5328	0.0052407	0.99476	0.010481	0.040897
TCCGTTCGTTATCAGCAACT	000052777	Trp53bp2	578.53	231.15	-1.3198	0.0064949	0.99351	0.01299	0.048514
AGGTACCAGCAGGAGGGCGT	000041902	Tm4sf5	466.17	125.88	-1.8805	0.0024768	0.99752	0.0049537	0.02241
AGGTACCAGCAGGAGGGCGT	000041902	Tm4sf5	307.39	113.71	-1.4268	0.017665	0.98234	0.035329	0.1037
GATGGCGCCAAGCACCCCAA	000041904	Tm4sf5	723.44	306.43	-1.2366	0.0050148	0.99499	0.01003	0.039486
GATGGCGCCAAGCACCCCAA	000041904	Tm4sf5	612.89	289.9	-1.0775	0.013091	0.98691	0.026183	0.082882
TTGAACGTAGTGTCAATGCT	000052207	Kctd12b	534.89	132.74	-2.0025	0.0012099	0.99879	0.0024199	0.012397
AGATTCTTCATAGATCGAGA	000052204	Kctd12b	1164.5	449.34	-1.3719	0.00061643	0.99938	0.0012329	0.0069589
GATAGCGAGTTATGTACACC	000052205	Kctd12b	767.16	347.87	-1.1387	0.0063676	0.99363	0.012735	0.047766
TATCGAGGCTCCTATACTCT	000052206	Kctd12b	1250.8	672.61	-0.89399	0.0063426	0.99366	0.012685	0.047614
AGGCGTTCAAGGCTCACACG	000017650	Trim28	1437.6	253.43	-2.4993	1.5797e-06	1	3.1594e-06	2.82e-05
ATGAAGGAGCTGAATAAGCG	000017651	Trim28	1762.2	553.12	-1.6699	1.5774e-05	0.99998	3.1548e-05	0.00025002
GCACTCCACACAATAGCTAG	000017653	Trim28	541.39	209.03	-1.3687	0.006519	0.99348	0.013038	0.048651
AGGCGTTCAAGGCTCACACG	000017650	Trim28	672.32	294.47	-1.1883	0.0071838	0.99282	0.014368	0.052444
GGGGTCAATGGTTACATACG	000039192	Pcdh18	376.09	13.732	-4.6779	0.00011477	0.99989	0.00022955	0.001568
AGGAGAGGAGAATTCCCCCG	000039191	Pcdh18	123.22	7.709	-3.8343	0.0039044	0.9961	0.0078088	0.03235
GGGGTCAATGGTTACATACG	000039192	Pcdh18	310.04	111.78	-1.4636	0.016076	0.98392	0.032151	0.09672
AGGAGAGGAGAATTCCCCCG	000039191	Pcdh18	173.65	72.474	-1.2492	0.052961	0.94704	0.10592	0.23085
CACCGACATATCCTCTATCG	000034735	Exosc8	885.08	14.454	-5.8414	3.9838e-07	1	7.9677e-07	7.5446e-06
AGAGCCACAACTGTCAACAT	000034734	Exosc8	100.29	2.2886	-4.9449	0.0017348	0.99827	0.0034697	0.016715
TTTAACGCCACAAATGACCG	000034737	Exosc8	1.325	60.708	4.7302	1	7.4208e-104	1.4842e-103	1.167e-101
CTCATTTGTCTAGACTACGA	000034736	Exosc8	92.748	403.76	2.1102	1	9.5967e-14	1.9193e-13	2.5985e-12
CTCCAGAGCCAGCTTCAACG	000050110	Egln1	373.64	74.199	-2.3167	0.0019975	0.998	0.0039951	0.018773
CGGCAGTACTGCGAGCTGTG	000050109	Egln1	640.75	209.03	-1.6114	0.0019408	0.99806	0.0038816	0.018324
CCCGGAGACCGGCTAAGCGG	000050108	Egln1	971.21	419.18	-1.2103	0.0024803	0.99752	0.0049606	0.022434
GAGCCCGGCTGCGAAACCAT	000050111	Egln1	317.59	169.36	-0.90311	0.057934	0.94207	0.11587	0.24596
AGGCACGAAAGATATCATAC	000043502	Zfp934	699.59	230.31	-1.5988	0.0015249	0.99848	0.0030497	0.015029
ACACATATAAGCATACGTAC	000043500	Zfp934	840.03	293.91	-1.5119	0.0011164	0.99888	0.0022329	0.011579
AGGCACGAAAGATATCATAC	000043502	Zfp934	373.31	136.56	-1.4442	0.011888	0.98811	0.023777	0.077176
CACAGTGAATATCTTCAGAG	000043503	Zfp934	254.44	113.67	-1.1555	0.041574	0.95843	0.083147	0.19387
GAGGGCGGTGTAGTCCCAAG	000036965	9130011E15Rik	13.25	151.29	3.4178	1	4.8686e-31	9.7373e-31	2.0375e-29
AAGAGTTCCTCCCAAAACCG	000036962	9130011E15Rik	1212.4	132.98	-3.1789	9.7188e-07	1	1.9438e-06	1.7748e-05
AAGAGTTCCTCCCAAAACCG	000036962	9130011E15Rik	492.17	102.99	-2.2457	0.00094574	0.99905	0.0018915	0.010033
ATTGTCATGCAGGACACGAA	000036964	9130011E15Rik	604.54	190.72	-1.6592	0.0020134	0.99799	0.0040268	0.018896
GGAGGCGCATCAGCAAACTG	000033509	Tulp4	324.09	35.093	-3.1711	0.00091287	0.99909	0.0018257	0.0097344
CATGGGCTAGCATTCTGCCG	000033508	Tulp4	198.75	57.818	-1.7638	0.019243	0.98076	0.038486	0.11043
AACATTGTAGAACTTGACCA	000033506	Tulp4	458.74	165.55	-1.4649	0.0072806	0.99272	0.014561	0.052984
CATGGGCTAGCATTCTGCCG	000033508	Tulp4	408.6	175.46	-1.2148	0.018064	0.98194	0.036129	0.10546
GATGCCTCAGTTCCAGACCT	000020767	Srp9	122.58	3.0515	-4.9308	0.0014017	0.9986	0.0028033	0.014011
GGCGGCCGAGAAGCTCTACC	000020768	Srp9	98.434	3.8144	-4.3683	0.0031475	0.99685	0.0062949	0.027209
GGCGGCCGAGAAGCTCTACC	000020768	Srp9	7.9498	136.83	3.9449	1	6.9575e-51	1.3915e-50	4.3412e-49
TGCAGCGACTCACCTTCATG	000020769	Srp9	596.24	47.218	-3.6307	4.496e-05	0.99996	8.992e-05	0.00066217
TCTATTAGATCAAGTGCAGG	000034721	Arhgef12	26.499	230.31	3.0723	1	7.6102e-28	1.522e-27	2.9702e-26
ATCATCCAGAAAGACGACAA	000034719	Arhgef12	564.44	107.93	-2.376	0.00043541	0.99956	0.00087082	0.0051483
GGACTGCCGACCAGCGACTG	000034720	Arhgef12	484.94	126.24	-1.9333	0.0019493	0.99805	0.0038986	0.01839
ATCATCCAGAAAGACGACAA	000034719	Arhgef12	375.16	122.82	-1.6031	0.0081181	0.99188	0.016236	0.057659
CAAAGGCAAGCCGTTCAAAG	000062441	Klhl9	704.89	227.42	-1.6278	0.0013519	0.99865	0.0027037	0.013591
AGTTACGAATGTACGACGAA	000062440	Klhl9	572.39	187.91	-1.6018	0.0028048	0.9972	0.0056096	0.024775
CAAAGGCAAGCCGTTCAAAG	000062441	Klhl9	428.1	183.09	-1.2209	0.016358	0.98364	0.032716	0.097973
TGCATCCACTTATTATAACG	000062442	Klhl9	319.45	163.26	-0.96413	0.049401	0.9506	0.098801	0.2194
TGTCTACACACTGAACACCG	000061071	Slfn9	237.73	57.979	-2.0171	0.0095648	0.99044	0.01913	0.065431
TGTCTACACACTGAACACCG	000061071	Slfn9	478.32	119.49	-1.9921	0.0017806	0.99822	0.0035612	0.01708
AGAACAATAACAAGACCAGT	000061069	Slfn9	413.24	170.12	-1.2754	0.01503	0.98497	0.03006	0.091989
GCAAACGCGGAGATGTACTC	000061070	Slfn9	906.28	383.52	-1.2385	0.0026831	0.99732	0.0053663	0.023893
TAAAAAGAAGAGATTAACCA	000039198	Wasl	576.36	106	-2.4319	0.00035707	0.99964	0.00071413	0.0043261
TTTGTATATAATAGTCCTAG	000039201	Wasl	499.6	93.072	-2.4118	0.00064727	0.99935	0.0012945	0.0072538
TAAAAAGAAGAGATTAACCA	000039198	Wasl	582.25	234.97	-1.3055	0.0067014	0.9933	0.013403	0.049696
TGTAGGTCCCAATCTACCCA	000039200	Wasl	381.67	215.13	-0.82416	0.058846	0.94115	0.11769	0.24864
TAAAGCCAGAAATCCCACCA	000077711	Vmn2r31	64.075	1.5258	-4.6873	0.0030657	0.99693	0.0061314	0.026633
TAAAGCCAGAAATCCCACCA	000077711	Vmn2r31	3.9749	33.727	2.8033	1	4.6277e-08	9.2553e-08	9.4697e-07
GTCCCATGAAAACTCACACG	000077710	Vmn2r31	800.28	290.05	-1.461	0.0015955	0.9984	0.003191	0.0156
GAAAAAACAGAGTGAAAACA	000077709	Vmn2r31	264.99	96.363	-1.45	0.021456	0.97854	0.042912	0.11975
AATGCCATAGCATGGGTGCA	000026042	Rqcd1	749.4	141.13	-2.4004	0.00011841	0.99988	0.00023682	0.001612
GCCTACTGCACTAGCCCAAG	000026044	Rqcd1	433.27	134.91	-1.676	0.0048864	0.99511	0.0097727	0.038676
GCCTACTGCACTAGCCCAAG	000026044	Rqcd1	387.24	128.93	-1.5792	0.0080009	0.992	0.016002	0.05701
GATCTTCTGGAGTATGAATG	000026043	Rqcd1	113.95	270.78	1.2415	0.9994	0.00059572	0.0011914	0.0067558
AGCTCCGACCGGAAGACCCA	000027123	Rpl23	0.92863	30.515	4.0304	1	1.5061e-41	3.0123e-41	7.7908e-40
AGCTCCGACCGGAAGACCCA	000027123	Rpl23	1.325	26.982	3.5892	1	6.7938e-21	1.3588e-20	2.2585e-19
CTGTGCAGACAACACAGGTG	000027124	Rpl23	0.92863	19.072	3.3795	1	1.0304e-16	2.0608e-16	3.0597e-15
AATCCGGAATTTCGCCCCGG	000027122	Rpl23	378.94	66.49	-2.493	0.0014305	0.99857	0.002861	0.014252
TGACGGTGCTGACCCCTGAG	000046999	Chpf2	577.69	162.85	-1.8204	0.0014804	0.99852	0.0029607	0.014668
GGAGTCTCCTATTGCGCTTG	000046997	Chpf2	781.73	226.45	-1.783	0.00055798	0.99944	0.001116	0.0063812
TCTGTATATACCGAGTCCTA	000046998	Chpf2	608.16	281.38	-1.1092	0.011878	0.98812	0.023756	0.077134
CCTGTGAAGTAGAGTAACCG	000046996	Chpf2	443.87	277.52	-0.67557	0.078547	0.92145	0.15709	0.30437
CGAGTGGAAACCTTACCGAG	000033327	Lrrc16a	866.53	171.53	-2.3301	6.7931e-05	0.99993	0.00013586	0.0009701
CTGCCCTGGAGTATAACCAG	000033328	Lrrc16a	896.12	296.76	-1.5911	0.00064974	0.99935	0.0012995	0.0072779
CGAGTGGAAACCTTACCGAG	000033327	Lrrc16a	599.89	205.22	-1.543	0.0029212	0.99708	0.0058424	0.02562
CTGCCCTGGAGTATAACCAG	000033328	Lrrc16a	1036.1	449.05	-1.2044	0.0020932	0.99791	0.0041863	0.019512
TGAGGCAATGGGTGTTAGGG	000016409	Sp1	638.64	119.49	-2.4083	0.00024307	0.99976	0.00048614	0.0030696
ACAGCCGCACAACTTTCACA	000016406	Sp1	657.19	246.69	-1.41	0.0034689	0.99653	0.0069377	0.029407
ACAGCCGCACAACTTTCACA	000016406	Sp1	326.88	131.98	-1.302	0.021114	0.97889	0.042227	0.11838
GTATGTGACCAATGTACCAG	000016407	Sp1	427.97	202.36	-1.0768	0.02463	0.97537	0.049259	0.13273
CCAAGCAATATGGCTACCCA	000072570	Zcwpw1	1266.7	273.67	-2.2064	1.0873e-05	0.99999	2.1746e-05	0.00017608
CCTGGAAGTTCTTTAACATG	000072571	Zcwpw1	988.43	239.94	-2.0379	8.2703e-05	0.99992	0.00016541	0.0011633
ACAGAGCATGGTCCAAACAG	000072568	Zcwpw1	55.649	159	1.4979	0.99966	0.00033726	0.00067452	0.0041133
CAGGATCAGTCTCAGATCAG	000072569	Zcwpw1	736.69	266.92	-1.4612	0.0020753	0.99792	0.0041506	0.019374
TAAAAAAACGAGGCACTCTG	000071895	Fastkd5	756.83	181.57	-2.0535	0.00027944	0.99972	0.00055887	0.0034805
GGAAACATCACGCCACACGG	000071894	Fastkd5	1126.2	401.83	-1.4845	0.00041068	0.99959	0.00082137	0.0048924
AAATGCCAAGCCAATCAGGC	000071892	Fastkd5	879.78	328.6	-1.4181	0.0013795	0.99862	0.002759	0.013828
TAAAAAAACGAGGCACTCTG	000071895	Fastkd5	975.18	392.2	-1.3119	0.0015421	0.99846	0.0030842	0.015164
TTTATGATGAAGATCGTGAC	000044375	Mctp1	561.79	159	-1.8145	0.001646	0.99835	0.0032919	0.016
ATTTAACAACCTAAAAGACG	000044372	Mctp1	531.31	172.49	-1.6174	0.0033138	0.99669	0.0066277	0.028363
GGTCATGGTCAGGATAATGG	000044374	Mctp1	1313	528.07	-1.3125	0.00052296	0.99948	0.0010459	0.0060355
CCAAAACTTTGAACCCTCAG	000044373	Mctp1	626.71	285.23	-1.1329	0.010262	0.98974	0.020524	0.069028
AAAGCATAACACTTATGAGA	000052389	Gm609	624.06	111.78	-2.4705	0.00023563	0.99976	0.00047127	0.0029869
AAAATGTTGAACAAATCACC	000052388	Gm609	1249.5	455.8	-1.4528	0.00030867	0.99969	0.00061733	0.0038005
TCCTTGGATAGTCATGAAGT	000052391	Gm609	581.66	213.93	-1.4388	0.0043881	0.99561	0.0087762	0.03549
AAAGCATAACACTTATGAGA	000052389	Gm609	475.46	186.91	-1.3423	0.0094452	0.99055	0.01889	0.064806
