# Supplementary figures and images for: Genome-wide screen reveals Rab12 GTPase as a critical activator of Parkinson’s disease-linked LRRK2 kinase
Source: eLife journal article supplement (doi:10.7554/elife.87098), 2023-06-23

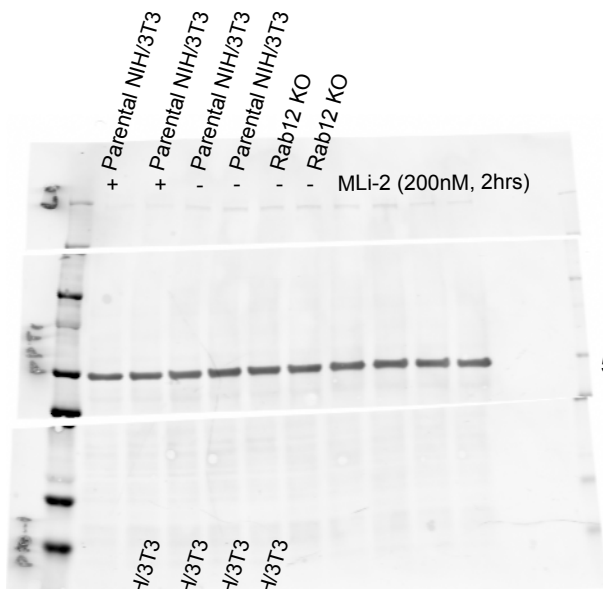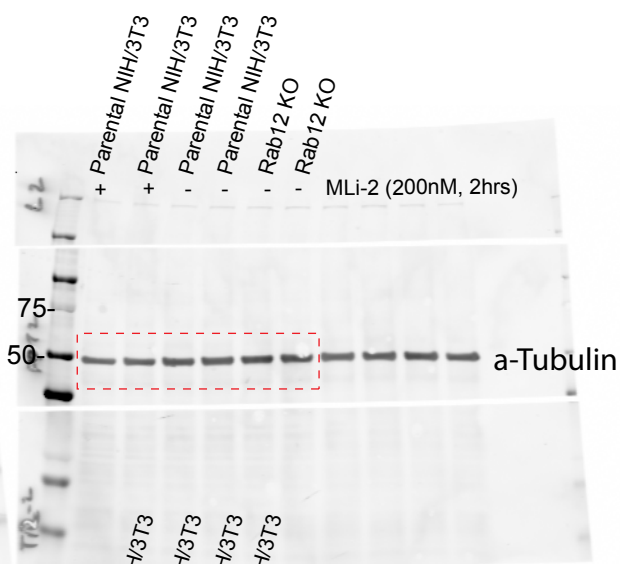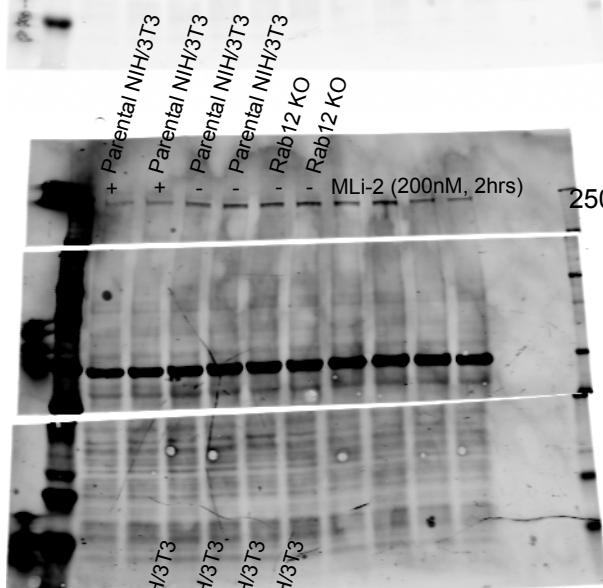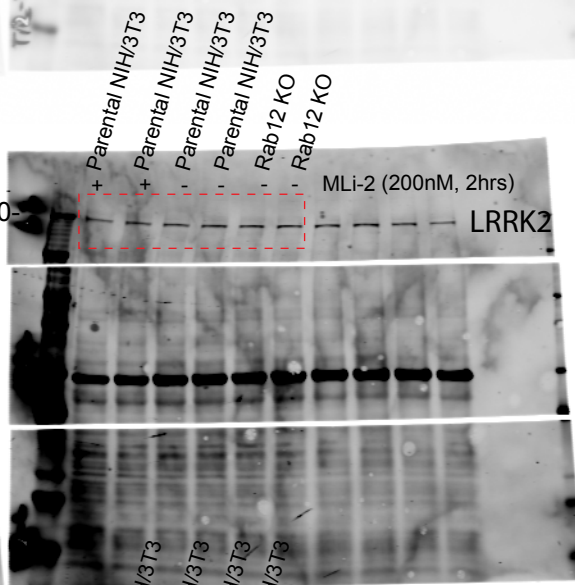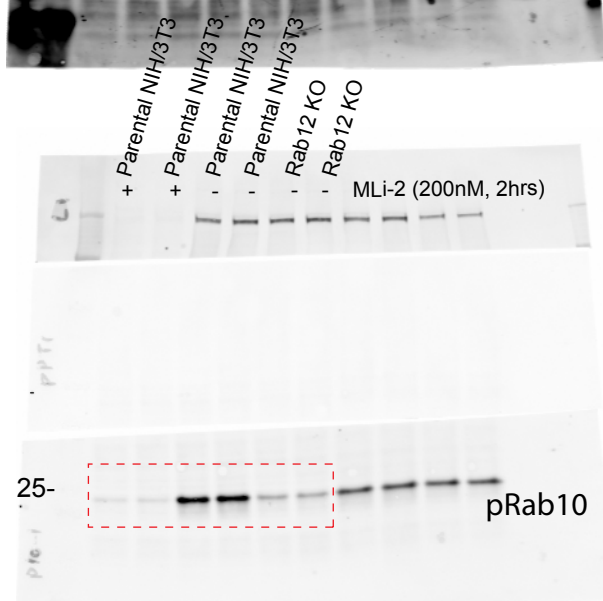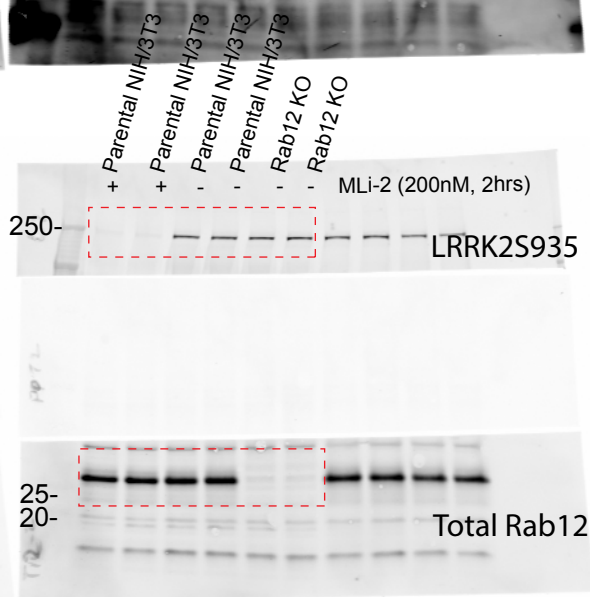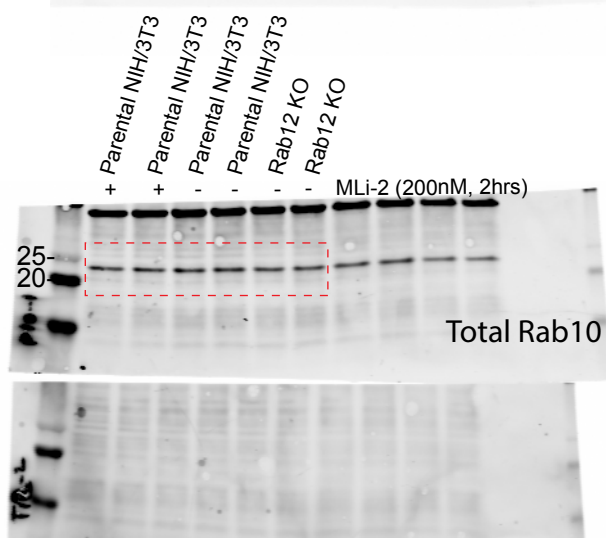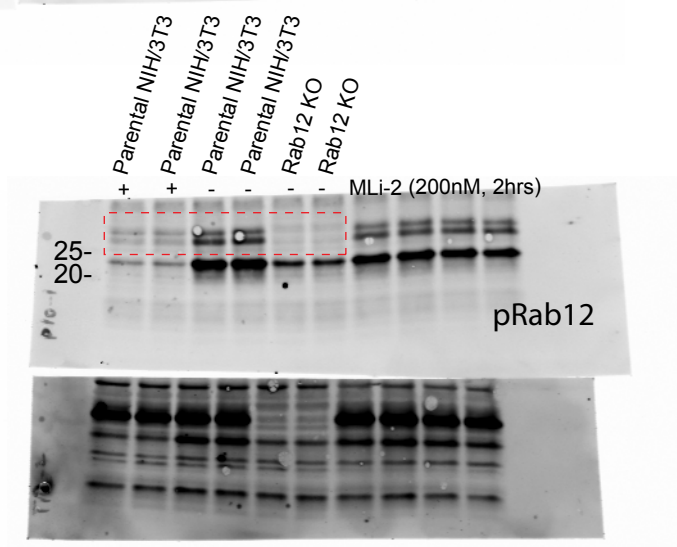

Supplement: fig2-data1 [file elife-87098-fig2-data1-v2.zip]

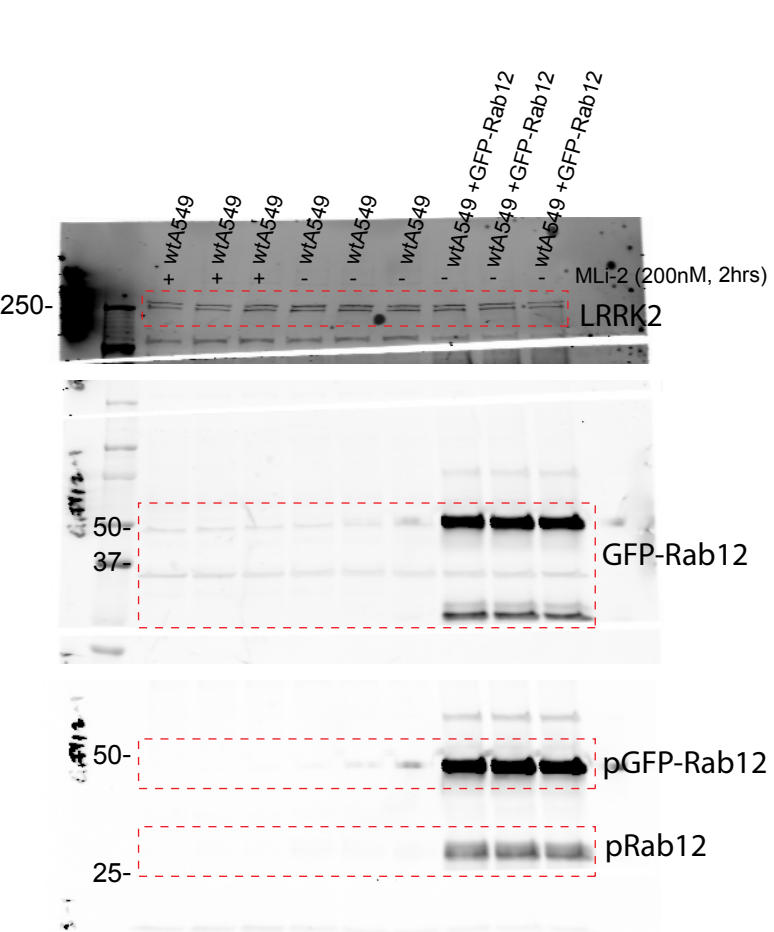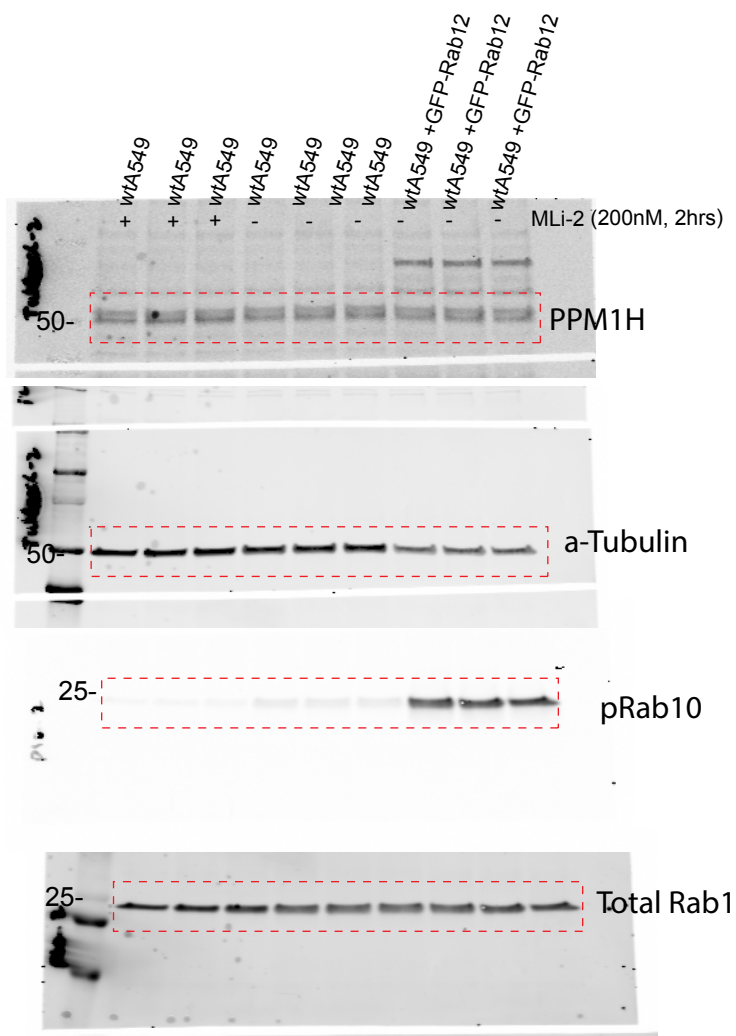

Supplement: fig3-data1 [file elife-87098-fig3-data1-v2.zip]

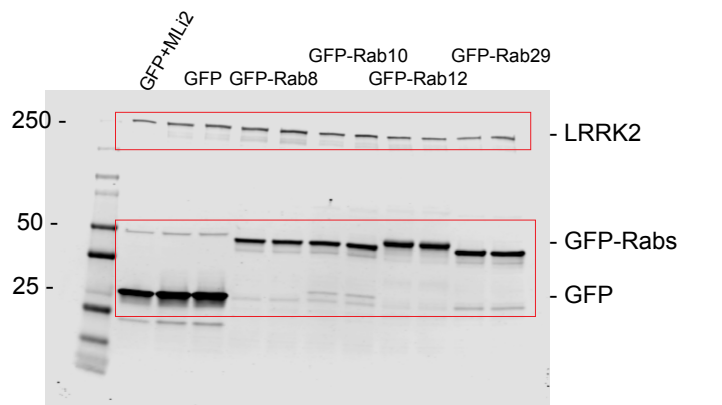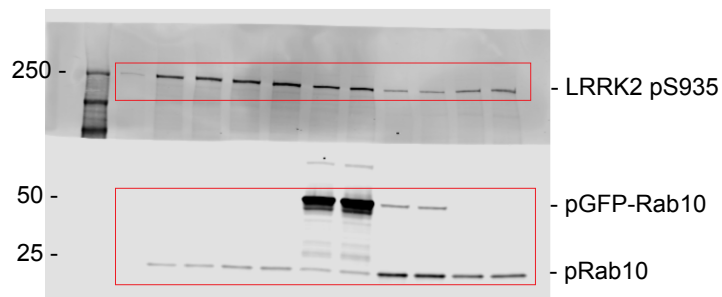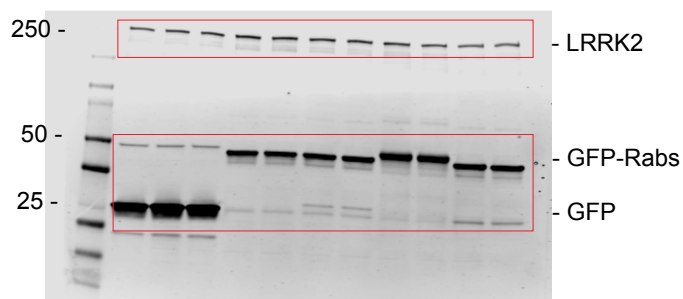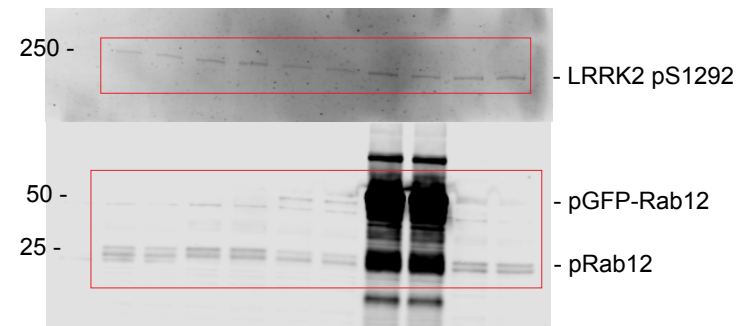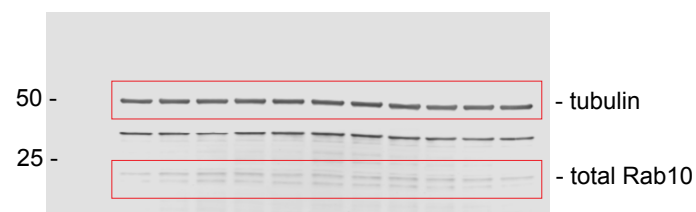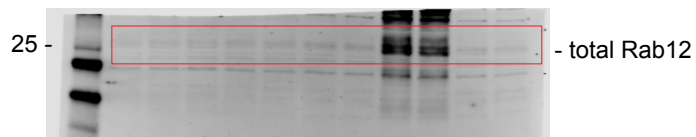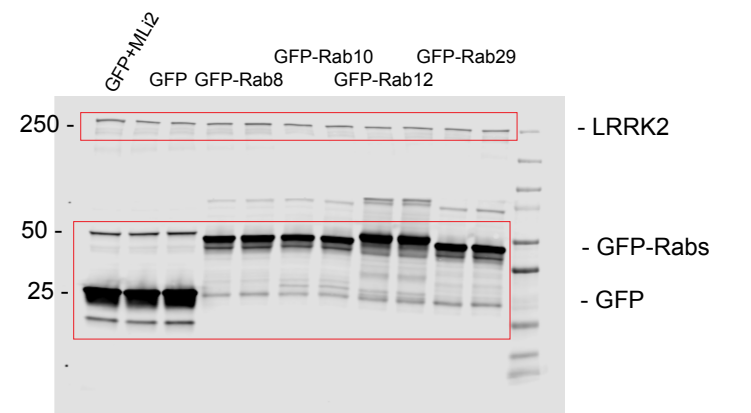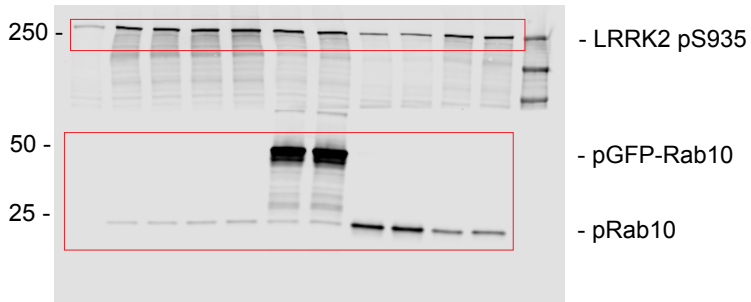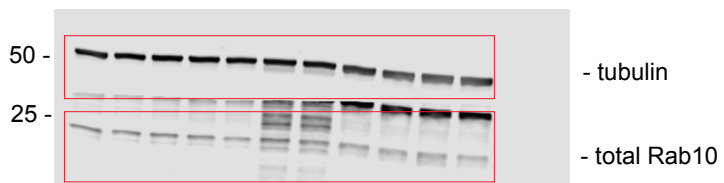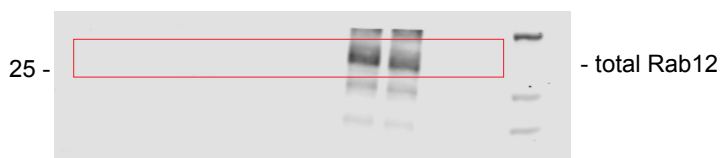

Supplement: fig3-data1 [file elife-87098-fig3-data1-v2.zip]

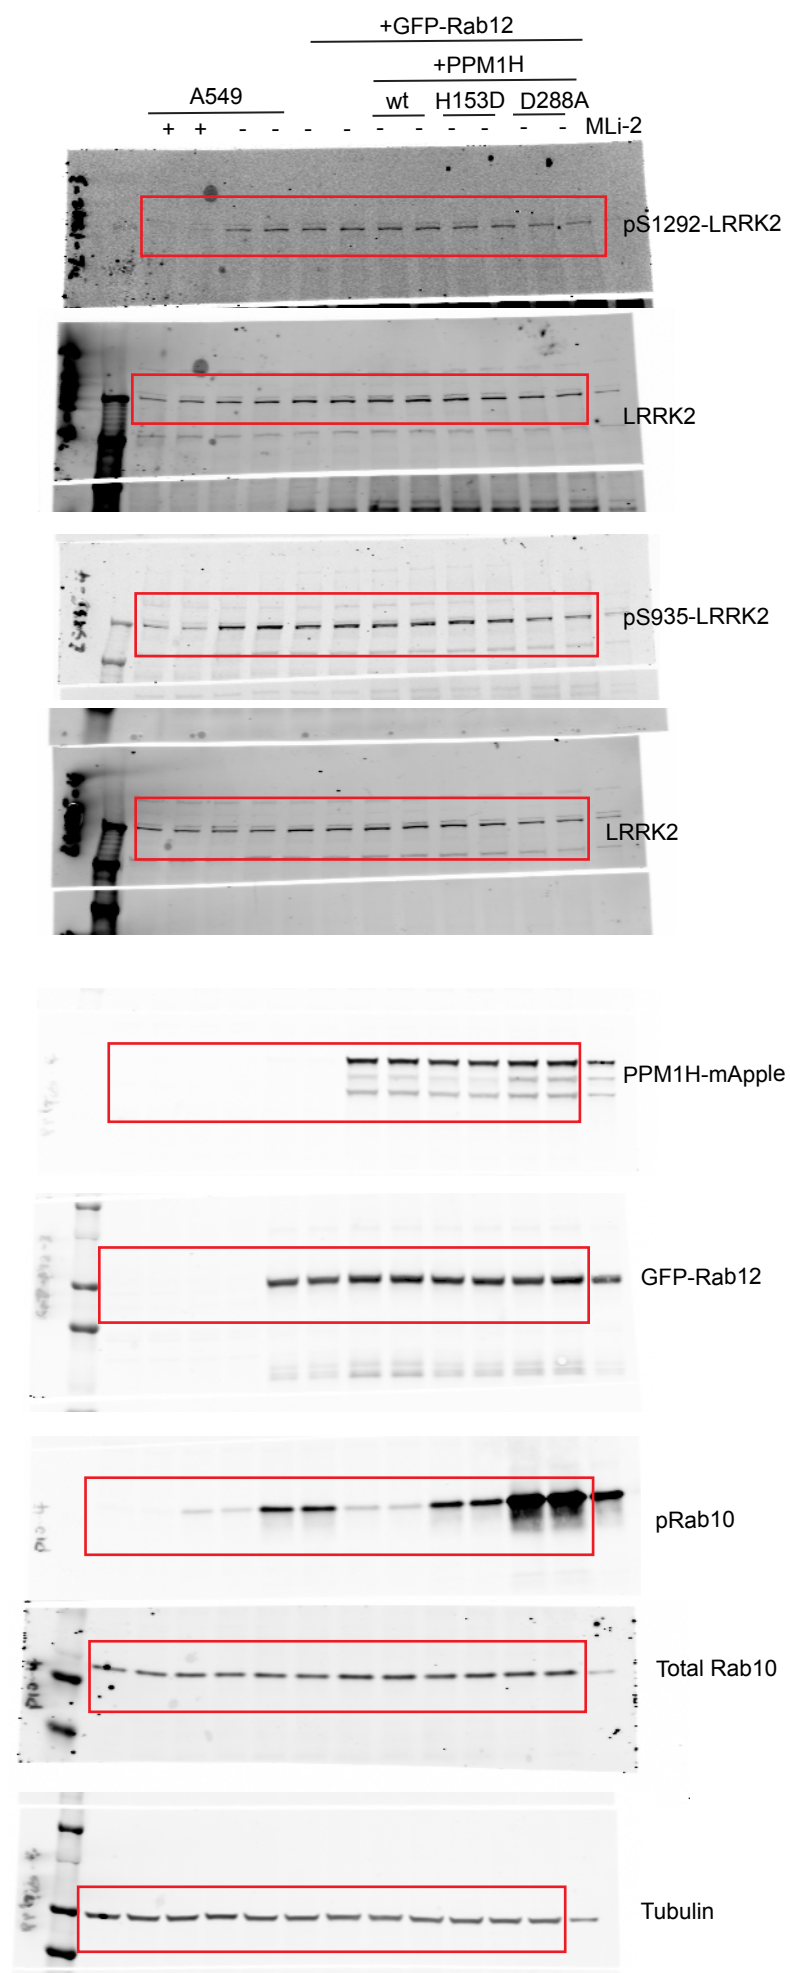

Supplement: fig4-data1 [file elife-87098-fig4-data1-v2.zip]

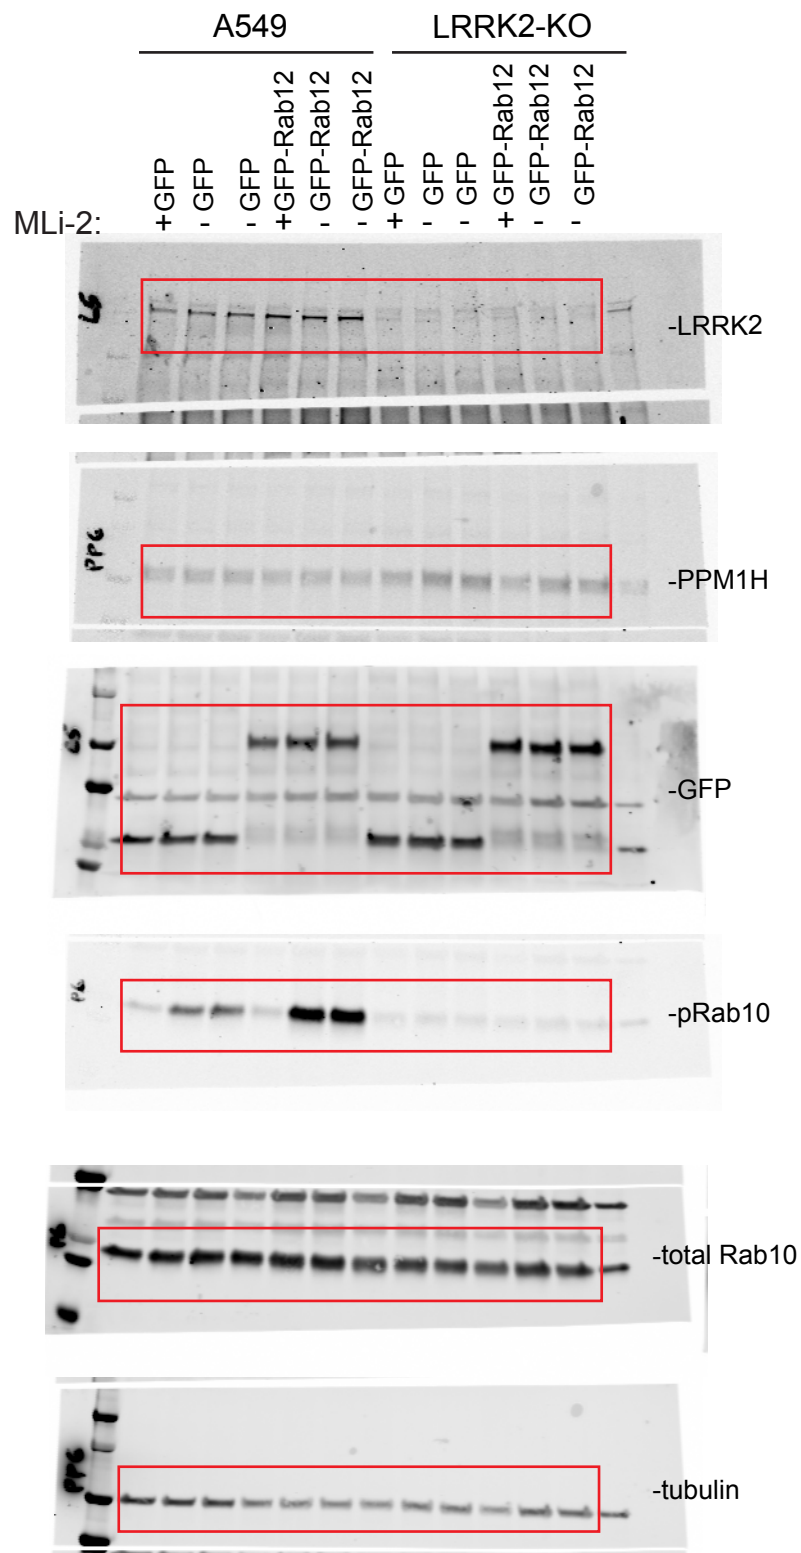

Supplement: fig5-data1 [file elife-87098-fig5-data1-v2.zip]

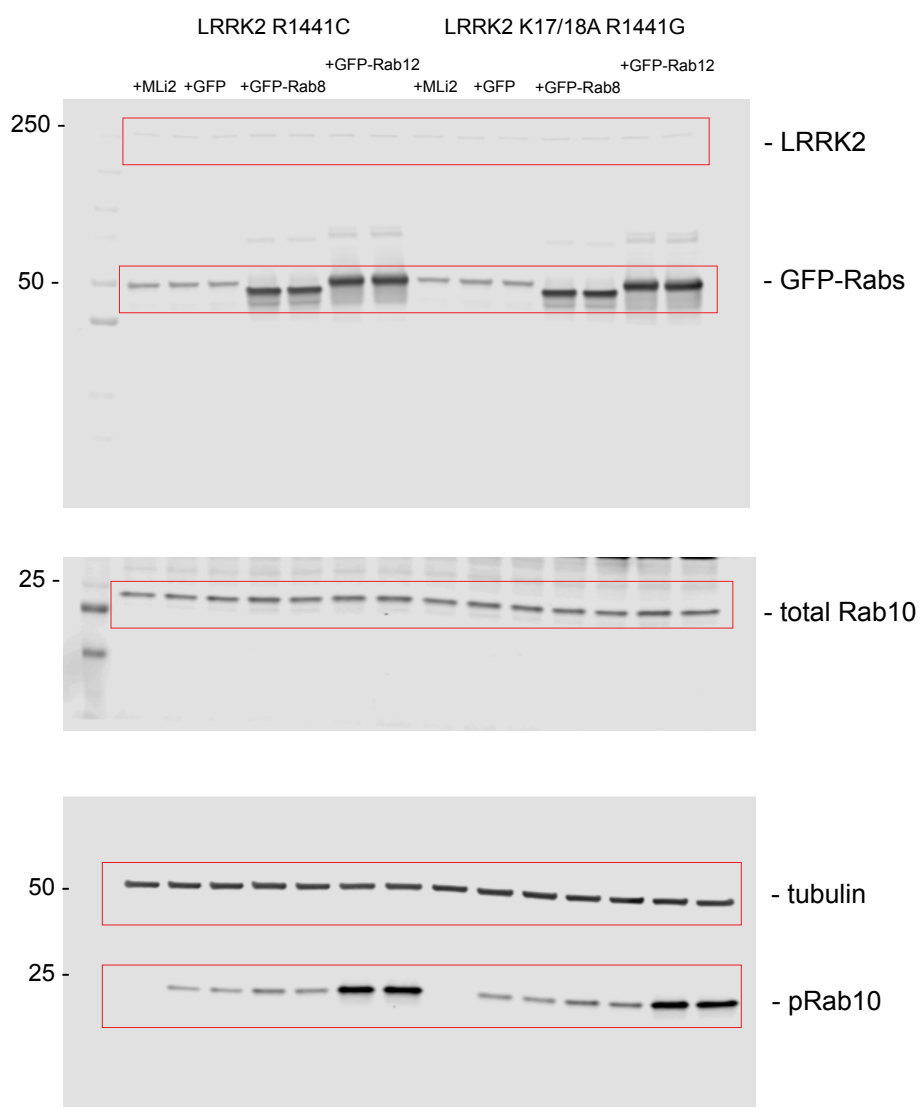

LRRK2 R1441C                      LRRK2 K17/18A R1441G  
 +GFP-Rab12                      +GFP-Rab12  
 +MLi2 +GFP +GFP-Rab8                      +MLi2+GFP+GFP-Rab8

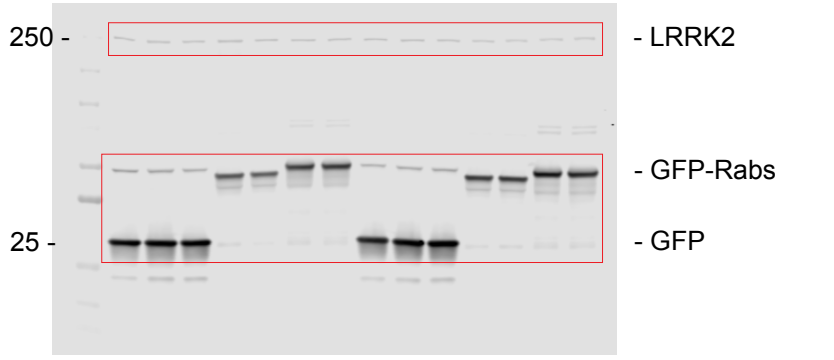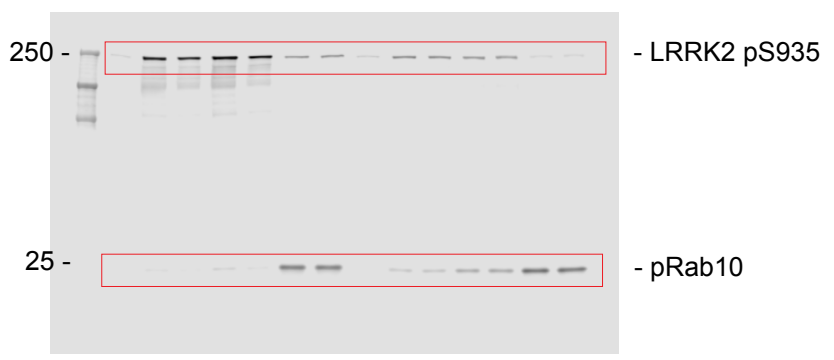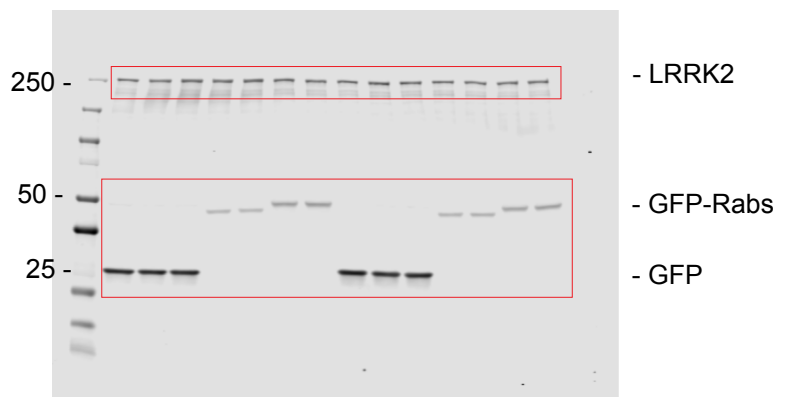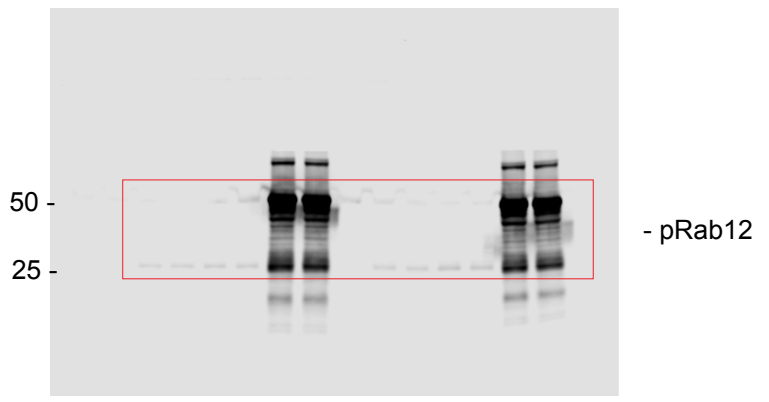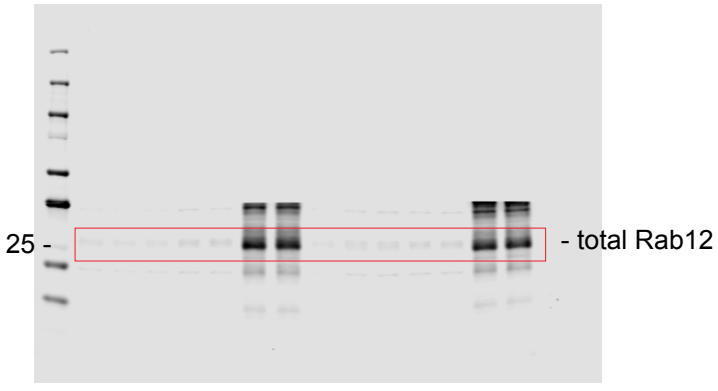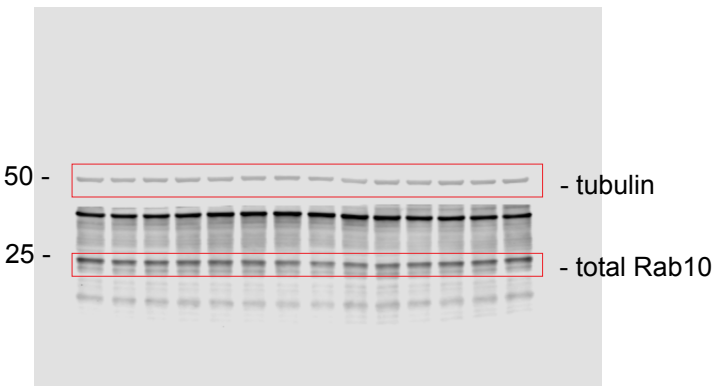

Supplement: fig8-data1 [file elife-87098-fig8-data1-v2.zip]

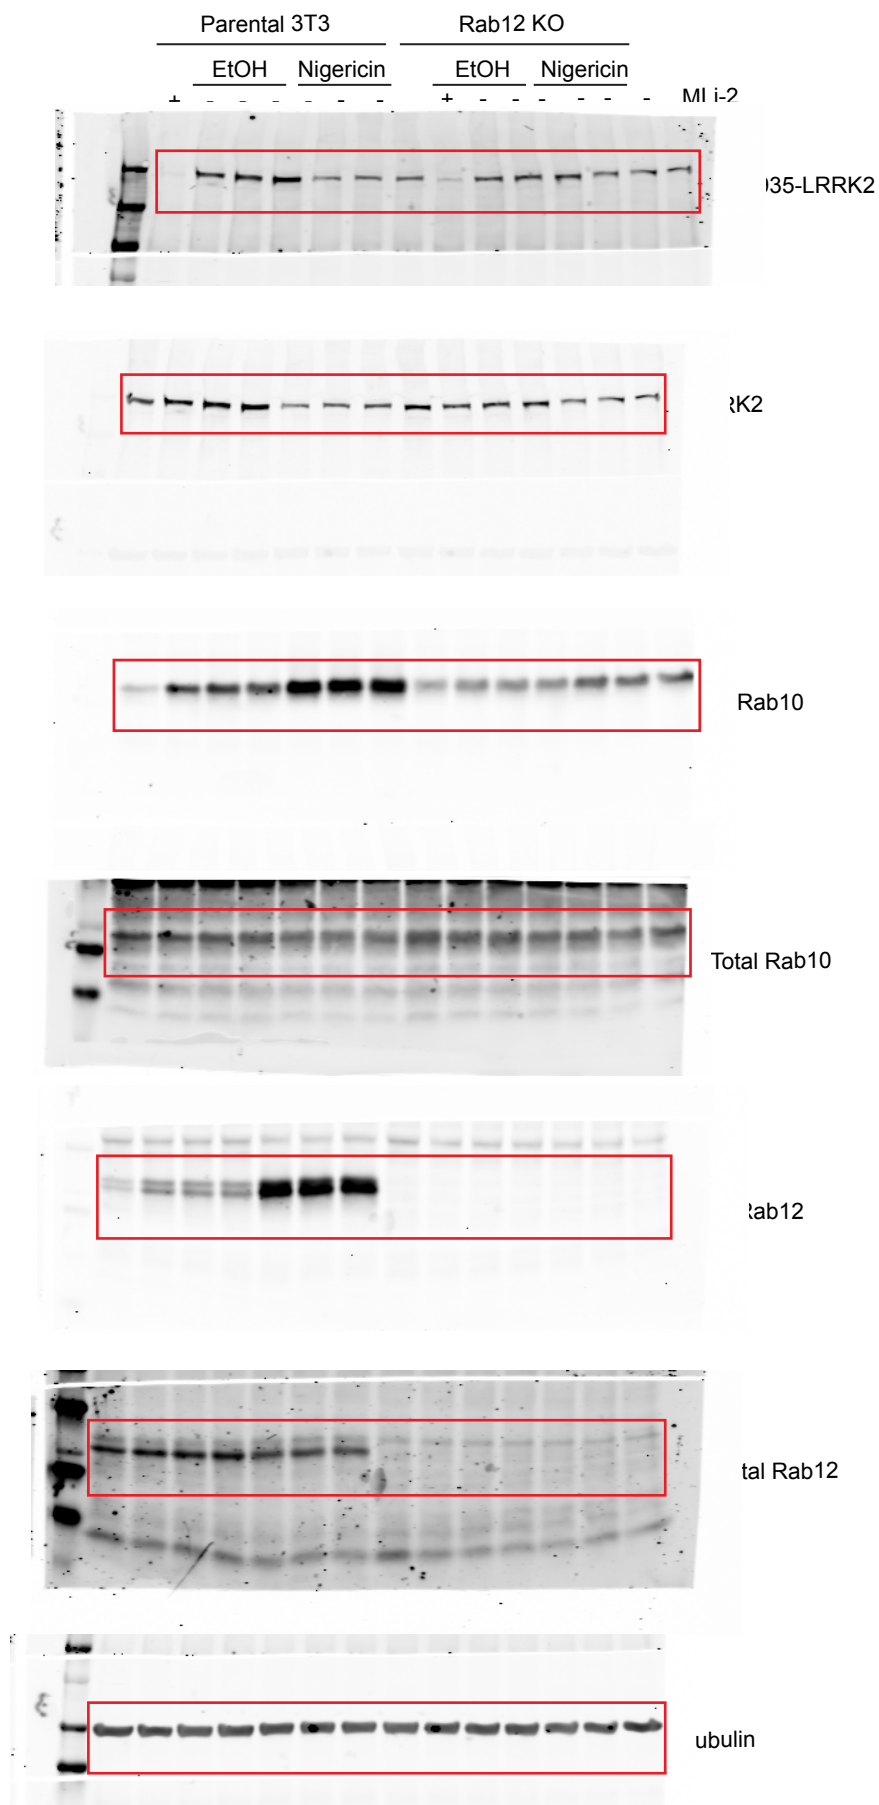

Supplement: fig9-data1 [file elife-87098-fig9-data1-v2.zip]

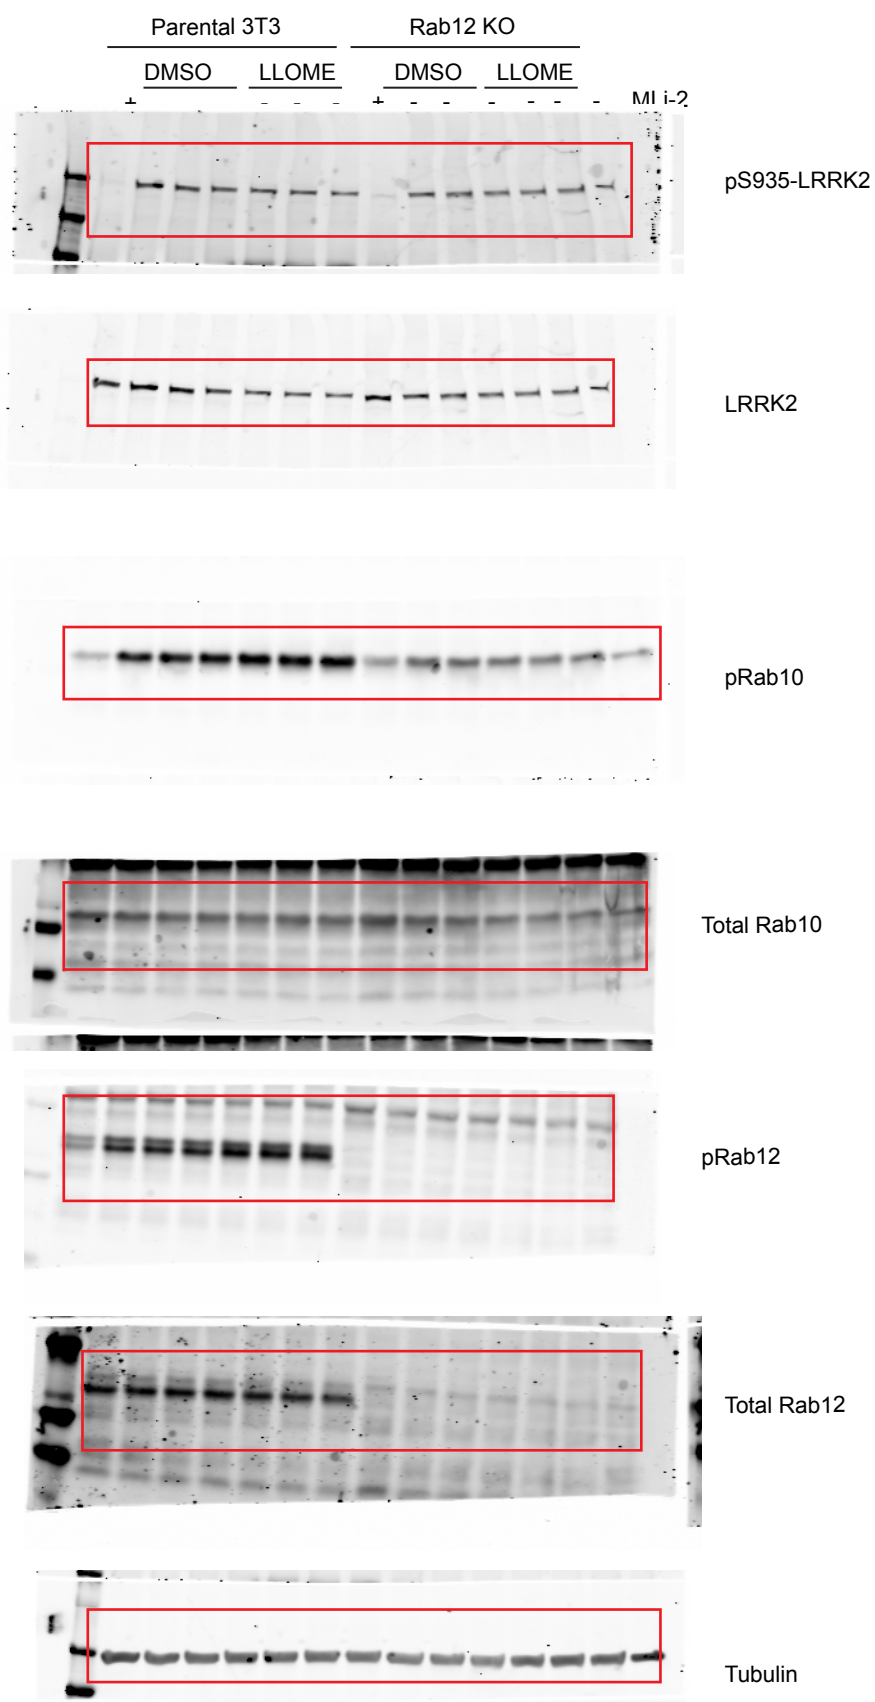

Supplement: fig9-data1 [file elife-87098-fig9-data1-v2.zip]
